# Supplementary material for: Tetrasaccharide iteration synthesis of a heparin-like dodecasaccharide and radiolabelling for in vivo tissue distribution studies
Source: Springer Nature journal article supplement (doi:10.1038/ncomms3016), 2013-07-05
Supplement: 41467_2013_BFncomms3016_MOESM1_ESM.mol [file 41467_2013_BFncomms3016_MOESM1_ESM.mol]

  ChemDraw06041310152D

214206  0  0  0  0  0  0  0  0999 V2000
   11.9691   -8.7769    0.0000 C   0  0  0  0  0  0  0  0  0  0  0  0
   12.3702   -8.0560    0.0000 O   0  0  0  0  0  0  0  0  0  0  0  0
   11.9465   -7.3481    0.0000 C   0  0  0  0  0  0  0  0  0  0  0  0
   12.3476   -6.6272    0.0000 C   0  0  0  0  0  0  0  0  0  0  0  0
   11.9238   -5.9194    0.0000 O   0  0  0  0  0  0  0  0  0  0  0  0
   11.1216   -7.3612    0.0000 C   0  0  0  0  0  0  0  0  0  0  0  0
   10.6978   -6.6534    0.0000 O   0  0  0  0  0  0  0  0  0  0  0  0
   10.7204   -8.0821    0.0000 C   0  0  0  0  0  0  0  0  0  0  0  0
    9.8956   -8.0952    0.0000 O   0  0  0  0  0  0  0  0  0  0  0  0
   11.1442   -8.7900    0.0000 C   0  0  0  0  0  0  0  0  0  0  0  0
   10.7431   -9.5109    0.0000 N   0  0  0  0  0  0  0  0  0  0  0  0
   12.3929   -9.4847    0.0000 O   0  0  0  0  0  0  0  0  0  0  0  0
   13.2018   -9.6322    0.0000 C   0  0  0  0  0  0  0  0  0  0  0  0
   13.4795  -10.4090    0.0000 C   0  0  0  0  0  0  0  0  0  0  0  0
   14.2911  -10.5570    0.0000 O   0  0  0  0  0  0  0  0  0  0  0  0
   14.8250   -9.9281    0.0000 C   0  0  0  0  0  0  0  0  0  0  0  0
   14.5474   -9.1512    0.0000 C   0  0  0  0  0  0  0  0  0  0  0  0
   13.7357   -9.0033    0.0000 C   0  0  0  0  0  0  0  0  0  0  0  0
   12.9473  -11.0358    0.0000 C   0  0  0  0  0  0  0  0  0  0  0  0
   15.0795   -8.5244    0.0000 O   0  0  0  0  0  0  0  0  0  0  0  0
   13.4590   -8.2290    0.0000 O   0  0  0  0  0  0  0  0  0  0  0  0
   12.1384  -10.8884    0.0000 O   0  0  0  0  0  0  0  0  0  0  0  0
   13.2241  -11.8101    0.0000 O   0  5  0  0  0  0  0  0  0  0  0  0
   15.6339  -10.0755    0.0000 O   0  0  0  0  0  0  0  0  0  0  0  0
   15.9564  -10.8594    0.0000 C   0  0  0  0  0  0  0  0  0  0  0  0
   16.7936  -10.9721    0.0000 C   0  0  0  0  0  0  0  0  0  0  0  0
   17.3103  -10.3032    0.0000 O   0  0  0  0  0  0  0  0  0  0  0  0
    9.9182   -9.5240    0.0000 S   0  0  0  0  0  0  0  0  0  0  0  0
    9.9529  -10.3482    0.0000 O   0  0  0  0  0  0  0  0  0  0  0  0
    9.0944   -9.5677    0.0000 O   0  5  0  0  0  0  0  0  0  0  0  0
    9.9255   -8.6990    0.0000 O   0  0  0  0  0  0  0  0  0  0  0  0
    6.9589   -5.2766    0.0000 C   0  0  0  0  0  0  0  0  0  0  0  0
    7.3600   -4.5556    0.0000 O   0  0  0  0  0  0  0  0  0  0  0  0
    6.9362   -3.8478    0.0000 C   0  0  0  0  0  0  0  0  0  0  0  0
    7.3373   -3.1269    0.0000 C   0  0  0  0  0  0  0  0  0  0  0  0
    6.9136   -2.4190    0.0000 O   0  0  0  0  0  0  0  0  0  0  0  0
    6.1113   -3.8609    0.0000 C   0  0  0  0  0  0  0  0  0  0  0  0
    5.6876   -3.1530    0.0000 O   0  0  0  0  0  0  0  0  0  0  0  0
    5.7102   -4.5818    0.0000 C   0  0  0  0  0  0  0  0  0  0  0  0
    4.8853   -4.5949    0.0000 O   0  0  0  0  0  0  0  0  0  0  0  0
    6.1340   -5.2896    0.0000 C   0  0  0  0  0  0  0  0  0  0  0  0
    5.7329   -6.0106    0.0000 N   0  0  0  0  0  0  0  0  0  0  0  0
    7.3827   -5.9844    0.0000 O   0  0  0  0  0  0  0  0  0  0  0  0
    8.1916   -6.1318    0.0000 C   0  0  0  0  0  0  0  0  0  0  0  0
    8.4692   -6.9087    0.0000 C   0  0  0  0  0  0  0  0  0  0  0  0
    9.2809   -7.0567    0.0000 O   0  0  0  0  0  0  0  0  0  0  0  0
    9.8148   -6.4277    0.0000 C   0  0  0  0  0  0  0  0  0  0  0  0
    9.5371   -5.6509    0.0000 C   0  0  0  0  0  0  0  0  0  0  0  0
    8.7255   -5.5029    0.0000 C   0  0  0  0  0  0  0  0  0  0  0  0
    7.9371   -7.5355    0.0000 C   0  0  0  0  0  0  0  0  0  0  0  0
   10.0693   -5.0241    0.0000 O   0  0  0  0  0  0  0  0  0  0  0  0
    8.4488   -4.7287    0.0000 O   0  0  0  0  0  0  0  0  0  0  0  0
    7.1282   -7.3881    0.0000 O   0  0  0  0  0  0  0  0  0  0  0  0
    8.2138   -8.3098    0.0000 O   0  5  0  0  0  0  0  0  0  0  0  0
    4.9080   -6.0236    0.0000 S   0  0  0  0  0  0  0  0  0  0  0  0
    4.9426   -6.8479    0.0000 O   0  0  0  0  0  0  0  0  0  0  0  0
    4.0841   -6.0674    0.0000 O   0  5  0  0  0  0  0  0  0  0  0  0
    4.9153   -5.1987    0.0000 O   0  0  0  0  0  0  0  0  0  0  0  0
    1.9526   -1.8099    0.0000 C   0  0  0  0  0  0  0  0  0  0  0  0
    2.3537   -1.0890    0.0000 O   0  0  0  0  0  0  0  0  0  0  0  0
    1.9300   -0.3811    0.0000 C   0  0  0  0  0  0  0  0  0  0  0  0
    2.3311    0.3398    0.0000 C   0  0  0  0  0  0  0  0  0  0  0  0
    1.9073    1.0476    0.0000 O   0  0  0  0  0  0  0  0  0  0  0  0
    1.1051   -0.3942    0.0000 C   0  0  0  0  0  0  0  0  0  0  0  0
    0.6813    0.3136    0.0000 O   0  0  0  0  0  0  0  0  0  0  0  0
    0.7039   -1.1151    0.0000 C   0  0  0  0  0  0  0  0  0  0  0  0
   -0.1210   -1.1282    0.0000 O   0  0  0  0  0  0  0  0  0  0  0  0
    1.1277   -1.8230    0.0000 C   0  0  0  0  0  0  0  0  0  0  0  0
    0.7266   -2.5439    0.0000 N   0  0  0  0  0  0  0  0  0  0  0  0
    2.3764   -2.5177    0.0000 O   0  0  0  0  0  0  0  0  0  0  0  0
    3.1853   -2.6652    0.0000 C   0  0  0  0  0  0  0  0  0  0  0  0
    3.4630   -3.4421    0.0000 C   0  0  0  0  0  0  0  0  0  0  0  0
    4.2746   -3.5900    0.0000 O   0  0  0  0  0  0  0  0  0  0  0  0
    4.8085   -2.9611    0.0000 C   0  0  0  0  0  0  0  0  0  0  0  0
    4.5308   -2.1842    0.0000 C   0  0  0  0  0  0  0  0  0  0  0  0
    3.7192   -2.0363    0.0000 C   0  0  0  0  0  0  0  0  0  0  0  0
    2.9308   -4.0689    0.0000 C   0  0  0  0  0  0  0  0  0  0  0  0
    5.0630   -1.5574    0.0000 O   0  0  0  0  0  0  0  0  0  0  0  0
    3.4425   -1.2620    0.0000 O   0  0  0  0  0  0  0  0  0  0  0  0
    2.1219   -3.9214    0.0000 O   0  0  0  0  0  0  0  0  0  0  0  0
    3.2076   -4.8431    0.0000 O   0  5  0  0  0  0  0  0  0  0  0  0
   -0.0983   -2.5570    0.0000 S   0  0  0  0  0  0  0  0  0  0  0  0
   -0.0636   -3.3813    0.0000 O   0  0  0  0  0  0  0  0  0  0  0  0
   -0.9221   -2.6007    0.0000 O   0  5  0  0  0  0  0  0  0  0  0  0
   -0.0910   -1.7320    0.0000 O   0  0  0  0  0  0  0  0  0  0  0  0
   -3.0576    1.6904    0.0000 C   0  0  0  0  0  0  0  0  0  0  0  0
   -2.6565    2.4113    0.0000 O   0  0  0  0  0  0  0  0  0  0  0  0
   -3.0803    3.1192    0.0000 C   0  0  0  0  0  0  0  0  0  0  0  0
   -2.6792    3.8401    0.0000 C   0  0  0  0  0  0  0  0  0  0  0  0
   -3.1029    4.5479    0.0000 O   0  0  0  0  0  0  0  0  0  0  0  0
   -3.9052    3.1061    0.0000 C   0  0  0  0  0  0  0  0  0  0  0  0
   -4.3290    3.8139    0.0000 O   0  0  0  0  0  0  0  0  0  0  0  0
   -4.3063    2.3852    0.0000 C   0  0  0  0  0  0  0  0  0  0  0  0
   -5.1312    2.3721    0.0000 O   0  0  0  0  0  0  0  0  0  0  0  0
   -3.8825    1.6773    0.0000 C   0  0  0  0  0  0  0  0  0  0  0  0
   -4.2836    0.9564    0.0000 N   0  0  0  0  0  0  0  0  0  0  0  0
   -2.6338    0.9826    0.0000 O   0  0  0  0  0  0  0  0  0  0  0  0
   -1.8250    0.8351    0.0000 C   0  0  0  0  0  0  0  0  0  0  0  0
   -1.5473    0.0583    0.0000 C   0  0  0  0  0  0  0  0  0  0  0  0
   -0.7356   -0.0897    0.0000 O   0  0  0  0  0  0  0  0  0  0  0  0
   -0.2017    0.5392    0.0000 C   0  0  0  0  0  0  0  0  0  0  0  0
   -0.4794    1.3161    0.0000 C   0  0  0  0  0  0  0  0  0  0  0  0
   -1.2910    1.4640    0.0000 C   0  0  0  0  0  0  0  0  0  0  0  0
   -2.0794   -0.5685    0.0000 C   0  0  0  0  0  0  0  0  0  0  0  0
    0.0528    1.9429    0.0000 O   0  0  0  0  0  0  0  0  0  0  0  0
   -1.5678    2.2383    0.0000 O   0  0  0  0  0  0  0  0  0  0  0  0
   -2.8883   -0.4211    0.0000 O   0  0  0  0  0  0  0  0  0  0  0  0
   -1.8027   -1.3428    0.0000 O   0  5  0  0  0  0  0  0  0  0  0  0
   -5.1085    0.9433    0.0000 S   0  0  0  0  0  0  0  0  0  0  0  0
   -5.0739    0.1191    0.0000 O   0  0  0  0  0  0  0  0  0  0  0  0
   -5.9324    0.8996    0.0000 O   0  5  0  0  0  0  0  0  0  0  0  0
   -5.1012    1.7683    0.0000 O   0  0  0  0  0  0  0  0  0  0  0  0
   -8.0792    5.1849    0.0000 C   0  0  0  0  0  0  0  0  0  0  0  0
   -7.6781    5.9058    0.0000 O   0  0  0  0  0  0  0  0  0  0  0  0
   -8.1019    6.6137    0.0000 C   0  0  0  0  0  0  0  0  0  0  0  0
   -7.7008    7.3346    0.0000 C   0  0  0  0  0  0  0  0  0  0  0  0
   -8.1246    8.0424    0.0000 O   0  0  0  0  0  0  0  0  0  0  0  0
   -8.9268    6.6006    0.0000 C   0  0  0  0  0  0  0  0  0  0  0  0
   -9.3506    7.3084    0.0000 O   0  0  0  0  0  0  0  0  0  0  0  0
   -9.3279    5.8797    0.0000 C   0  0  0  0  0  0  0  0  0  0  0  0
  -10.1528    5.8666    0.0000 O   0  0  0  0  0  0  0  0  0  0  0  0
   -8.9041    5.1718    0.0000 C   0  0  0  0  0  0  0  0  0  0  0  0
   -9.3052    4.4509    0.0000 N   0  0  0  0  0  0  0  0  0  0  0  0
   -7.6555    4.4771    0.0000 O   0  0  0  0  0  0  0  0  0  0  0  0
   -6.8466    4.3296    0.0000 C   0  0  0  0  0  0  0  0  0  0  0  0
   -6.5689    3.5527    0.0000 C   0  0  0  0  0  0  0  0  0  0  0  0
   -5.7573    3.4048    0.0000 O   0  0  0  0  0  0  0  0  0  0  0  0
   -5.2233    4.0337    0.0000 C   0  0  0  0  0  0  0  0  0  0  0  0
   -5.5010    4.8106    0.0000 C   0  0  0  0  0  0  0  0  0  0  0  0
   -6.3126    4.9585    0.0000 C   0  0  0  0  0  0  0  0  0  0  0  0
   -7.1010    2.9259    0.0000 C   0  0  0  0  0  0  0  0  0  0  0  0
   -4.9688    5.4374    0.0000 O   0  0  0  0  0  0  0  0  0  0  0  0
   -6.5894    5.7328    0.0000 O   0  0  0  0  0  0  0  0  0  0  0  0
   -7.9099    3.0734    0.0000 O   0  0  0  0  0  0  0  0  0  0  0  0
   -6.8243    2.1517    0.0000 O   0  5  0  0  0  0  0  0  0  0  0  0
  -10.1301    4.4378    0.0000 S   0  0  0  0  0  0  0  0  0  0  0  0
  -10.0955    3.6135    0.0000 O   0  0  0  0  0  0  0  0  0  0  0  0
  -10.9540    4.3941    0.0000 O   0  5  0  0  0  0  0  0  0  0  0  0
  -10.1228    5.2628    0.0000 O   0  0  0  0  0  0  0  0  0  0  0  0
  -13.0895    8.6852    0.0000 C   0  0  0  0  0  0  0  0  0  0  0  0
  -12.6884    9.4061    0.0000 O   0  0  0  0  0  0  0  0  0  0  0  0
  -13.1121   10.1140    0.0000 C   0  0  0  0  0  0  0  0  0  0  0  0
  -12.7110   10.8349    0.0000 C   0  0  0  0  0  0  0  0  0  0  0  0
  -13.1348   11.5427    0.0000 O   0  0  0  0  0  0  0  0  0  0  0  0
  -13.9370   10.1009    0.0000 C   0  0  0  0  0  0  0  0  0  0  0  0
  -14.3608   10.8087    0.0000 O   0  0  0  0  0  0  0  0  0  0  0  0
  -14.3381    9.3800    0.0000 C   0  0  0  0  0  0  0  0  0  0  0  0
  -15.1630    9.3669    0.0000 O   0  0  0  0  0  0  0  0  0  0  0  0
  -13.9144    8.6721    0.0000 C   0  0  0  0  0  0  0  0  0  0  0  0
  -14.3155    7.9512    0.0000 N   0  0  0  0  0  0  0  0  0  0  0  0
  -12.6657    7.9774    0.0000 O   0  0  0  0  0  0  0  0  0  0  0  0
  -11.8568    7.8299    0.0000 C   0  0  0  0  0  0  0  0  0  0  0  0
  -11.5791    7.0531    0.0000 C   0  0  0  0  0  0  0  0  0  0  0  0
  -10.7675    6.9051    0.0000 O   0  0  0  0  0  0  0  0  0  0  0  0
  -10.2335    7.5340    0.0000 C   0  0  0  0  0  0  0  0  0  0  0  0
  -10.5112    8.3109    0.0000 C   0  0  0  0  0  0  0  0  0  0  0  0
  -11.3229    8.4588    0.0000 C   0  0  0  0  0  0  0  0  0  0  0  0
  -12.1113    6.4263    0.0000 C   0  0  0  0  0  0  0  0  0  0  0  0
   -9.9791    8.9377    0.0000 O   0  0  0  0  0  0  0  0  0  0  0  0
  -11.5996    9.2331    0.0000 O   0  0  0  0  0  0  0  0  0  0  0  0
  -12.9202    6.5737    0.0000 O   0  0  0  0  0  0  0  0  0  0  0  0
  -11.8345    5.6520    0.0000 O   0  5  0  0  0  0  0  0  0  0  0  0
  -15.1404    7.9381    0.0000 S   0  0  0  0  0  0  0  0  0  0  0  0
  -15.1057    7.1139    0.0000 O   0  0  0  0  0  0  0  0  0  0  0  0
  -15.9642    7.8944    0.0000 O   0  5  0  0  0  0  0  0  0  0  0  0
  -15.1331    8.7631    0.0000 O   0  0  0  0  0  0  0  0  0  0  0  0
  -15.2802   11.0863    0.0000 S   0  0  0  0  0  0  0  0  0  0  0  0
  -15.5025   10.2918    0.0000 O   0  0  0  0  0  0  0  0  0  0  0  0
  -16.0771   11.2999    0.0000 O   0  5  0  0  0  0  0  0  0  0  0  0
  -15.0178   11.8685    0.0000 O   0  0  0  0  0  0  0  0  0  0  0  0
   -9.9802    9.9121    0.0000 S   0  0  0  0  0  0  0  0  0  0  0  0
  -10.8051    9.9044    0.0000 O   0  0  0  0  0  0  0  0  0  0  0  0
   -9.9970   10.7370    0.0000 O   0  5  0  0  0  0  0  0  0  0  0  0
   -9.1559    9.8779    0.0000 O   0  0  0  0  0  0  0  0  0  0  0  0
   15.0803   -7.5315    0.0000 S   0  0  0  0  0  0  0  0  0  0  0  0
   14.2554   -7.5393    0.0000 O   0  0  0  0  0  0  0  0  0  0  0  0
   15.0635   -6.7067    0.0000 O   0  5  0  0  0  0  0  0  0  0  0  0
   15.9046   -7.5657    0.0000 O   0  0  0  0  0  0  0  0  0  0  0  0
    0.0253    2.9540    0.0000 S   0  0  0  0  0  0  0  0  0  0  0  0
   -0.7997    2.9462    0.0000 O   0  0  0  0  0  0  0  0  0  0  0  0
    0.0085    3.7788    0.0000 O   0  5  0  0  0  0  0  0  0  0  0  0
    0.8496    2.9198    0.0000 O   0  0  0  0  0  0  0  0  0  0  0  0
   10.0668   -4.0077    0.0000 S   0  0  0  0  0  0  0  0  0  0  0  0
    9.2418   -4.0155    0.0000 O   0  0  0  0  0  0  0  0  0  0  0  0
   10.0499   -3.1829    0.0000 O   0  5  0  0  0  0  0  0  0  0  0  0
   10.8911   -4.0419    0.0000 O   0  0  0  0  0  0  0  0  0  0  0  0
    5.0675   -0.5555    0.0000 S   0  0  0  0  0  0  0  0  0  0  0  0
    4.2426   -0.5633    0.0000 O   0  0  0  0  0  0  0  0  0  0  0  0
    5.0507    0.2693    0.0000 O   0  5  0  0  0  0  0  0  0  0  0  0
    5.8918   -0.5897    0.0000 O   0  0  0  0  0  0  0  0  0  0  0  0
   -4.9883    6.4492    0.0000 S   0  0  0  0  0  0  0  0  0  0  0  0
   -5.8132    6.4414    0.0000 O   0  0  0  0  0  0  0  0  0  0  0  0
   -5.0051    7.2740    0.0000 O   0  5  0  0  0  0  0  0  0  0  0  0
   -4.1640    6.4150    0.0000 O   0  0  0  0  0  0  0  0  0  0  0  0
   17.1069  -11.7353    0.0000 H   2  0  0  0  0  0  0  0  0  0  0  0
   12.2480  -11.8685    0.0000 Na  0  3  0  0  0  0  0  0  0  0  0  0
    7.9650   -9.6196    0.0000 Na  0  3  0  0  0  0  0  0  0  0  0  0
    7.1948   -8.3252    0.0000 Na  0  3  0  0  0  0  0  0  0  0  0  0
    2.9548   -6.1192    0.0000 Na  0  3  0  0  0  0  0  0  0  0  0  0
    2.2315   -4.9015    0.0000 Na  0  3  0  0  0  0  0  0  0  0  0  0
   -2.0515   -2.6526    0.0000 Na  0  3  0  0  0  0  0  0  0  0  0  0
   -2.8217   -1.3582    0.0000 Na  0  3  0  0  0  0  0  0  0  0  0  0
   -7.0617    0.8477    0.0000 Na  0  3  0  0  0  0  0  0  0  0  0  0
   -7.8003    2.0933    0.0000 Na  0  3  0  0  0  0  0  0  0  0  0  0
  -12.0834    4.3422    0.0000 Na  0  3  0  0  0  0  0  0  0  0  0  0
  -12.8535    5.6366    0.0000 Na  0  3  0  0  0  0  0  0  0  0  0  0
  -17.0936    7.8425    0.0000 Na  0  3  0  0  0  0  0  0  0  0  0  0
  -17.3103   11.2564    0.0000 Na  0  3  0  0  0  0  0  0  0  0  0  0
   15.7718   -6.6687    0.0000 Na  0  3  0  0  0  0  0  0  0  0  0  0
   10.7440   -3.1449    0.0000 Na  0  3  0  0  0  0  0  0  0  0  0  0
    5.8450    0.2930    0.0000 Na  0  3  0  0  0  0  0  0  0  0  0  0
    0.7741    3.7738    0.0000 Na  0  3  0  0  0  0  0  0  0  0  0  0
   -4.2967    7.2547    0.0000 Na  0  3  0  0  0  0  0  0  0  0  0  0
   -9.2817   10.7785    0.0000 Na  0  3  0  0  0  0  0  0  0  0  0  0
  1 12  1  6      
  1  2  1  0      
  2  3  1  0      
  3  4  1  1      
  4  5  1  0      
  3  6  1  0      
  6  7  1  6      
  6  8  1  0      
  8  9  1  1      
  8 10  1  0      
  1 10  1  0      
 10 11  1  6      
 13 12  1  1      
 13 14  1  0      
 14 15  1  0      
 15 16  1  0      
 16 17  1  0      
 17 18  1  0      
 18 13  1  0      
 14 19  1  1      
 17 20  1  1      
 18 21  1  6      
 16 24  1  6      
 19 22  2  0      
 19 23  1  0      
 24 25  1  0      
 25 26  1  0      
 26 27  1  0      
 11 28  1  0      
 28 29  2  0      
 28 30  1  0      
 28 31  2  0      
 32 43  1  6      
 32 33  1  0      
 33 34  1  0      
 34 35  1  1      
 35 36  1  0      
 34 37  1  0      
 37 38  1  6      
 37 39  1  0      
 39 40  1  1      
 39 41  1  0      
 32 41  1  0      
 41 42  1  6      
 44 43  1  1      
 44 45  1  0      
 45 46  1  0      
 46 47  1  0      
 47 48  1  0      
 48 49  1  0      
 49 44  1  0      
 45 50  1  1      
 48 51  1  1      
 49 52  1  6      
 50 53  2  0      
 50 54  1  0      
 42 55  1  0      
 55 56  2  0      
 55 57  1  0      
 55 58  2  0      
 47  7  1  6      
 59 70  1  6      
 59 60  1  0      
 60 61  1  0      
 61 62  1  1      
 62 63  1  0      
 61 64  1  0      
 64 65  1  6      
 64 66  1  0      
 66 67  1  1      
 66 68  1  0      
 59 68  1  0      
 68 69  1  6      
 71 70  1  1      
 71 72  1  0      
 72 73  1  0      
 73 74  1  0      
 74 75  1  0      
 75 76  1  0      
 76 71  1  0      
 72 77  1  1      
 75 78  1  1      
 76 79  1  6      
 77 80  2  0      
 77 81  1  0      
 69 82  1  0      
 82 83  2  0      
 82 84  1  0      
 82 85  2  0      
 86 97  1  6      
 86 87  1  0      
 87 88  1  0      
 88 89  1  1      
 89 90  1  0      
 88 91  1  0      
 91 92  1  6      
 91 93  1  0      
 93 94  1  1      
 93 95  1  0      
 86 95  1  0      
 95 96  1  6      
 98 97  1  1      
 98 99  1  0      
 99100  1  0      
100101  1  0      
101102  1  0      
102103  1  0      
103 98  1  0      
 99104  1  1      
102105  1  1      
103106  1  6      
104107  2  0      
104108  1  0      
 96109  1  0      
109110  2  0      
109111  1  0      
109112  2  0      
101 65  1  6      
 74 38  1  6      
113124  1  6      
113114  1  0      
114115  1  0      
115116  1  1      
116117  1  0      
115118  1  0      
118119  1  6      
118120  1  0      
120121  1  1      
120122  1  0      
113122  1  0      
122123  1  6      
125124  1  1      
125126  1  0      
126127  1  0      
127128  1  0      
128129  1  0      
129130  1  0      
130125  1  0      
126131  1  1      
129132  1  1      
130133  1  6      
131134  2  0      
131135  1  0      
123136  1  0      
136137  2  0      
136138  1  0      
136139  2  0      
140151  1  6      
140141  1  0      
141142  1  0      
142143  1  1      
143144  1  0      
142145  1  0      
145146  1  6      
145147  1  0      
147148  1  1      
147149  1  0      
140149  1  0      
149150  1  6      
152151  1  1      
152153  1  0      
153154  1  0      
154155  1  0      
155156  1  0      
156157  1  0      
157152  1  0      
153158  1  1      
156159  1  1      
157160  1  6      
158161  2  0      
158162  1  0      
150163  1  0      
163164  2  0      
163165  1  0      
163166  2  0      
155119  1  6      
128 92  1  6      
167168  2  0      
167169  1  0      
167170  2  0      
146167  1  0      
171172  2  0      
171173  1  0      
171174  2  0      
175176  2  0      
175177  1  0      
175178  2  0      
159171  1  0      
179180  2  0      
179181  1  0      
179182  2  0      
183184  2  0      
183185  1  0      
183186  2  0      
187188  2  0      
187189  1  0      
187190  2  0      
191192  2  0      
191193  1  0      
191194  2  0      
132191  1  0      
105179  1  0      
 78187  1  0      
 51183  1  0      
 20175  1  0      
 26195  1  0      
M  ISO  1 195   3
M  CHG  8  23  -1  30  -1  54  -1  57  -1  81  -1  84  -1 108  -1 111  -1
M  CHG  8 135  -1 138  -1 162  -1 165  -1 169  -1 173  -1 177  -1 181  -1
M  CHG  8 185  -1 189  -1 193  -1 196   1 197   1 198   1 199   1 200   1
M  CHG  8 201   1 202   1 203   1 204   1 205   1 206   1 207   1 208   1
M  CHG  6 209   1 210   1 211   1 212   1 213   1 214   1
M  END
