# Supplementary material for: Tetrasaccharide iteration synthesis of a heparin-like dodecasaccharide and radiolabelling for in vivo tissue distribution studies
Source: Springer Nature journal article supplement (doi:10.1038/ncomms3016), 2013-07-05
Supplement: 41467_2013_BFncomms3016_MOESM5_ESM.mol [file 41467_2013_BFncomms3016_MOESM5_ESM.mol]

  ChemDraw06041310152D

 71 77  0  0  0  0  0  0  0  0999 V2000
   -0.5819   -0.6488    0.0000 C   0  0  0  0  0  0  0  0  0  0  0  0
   -0.1808    0.0721    0.0000 O   0  0  0  0  0  0  0  0  0  0  0  0
   -0.6046    0.7800    0.0000 C   0  0  0  0  0  0  0  0  0  0  0  0
   -0.2034    1.5009    0.0000 C   0  0  0  0  0  0  0  0  0  0  0  0
   -0.6272    2.2087    0.0000 O   0  0  0  0  0  0  0  0  0  0  0  0
   -0.2261    2.9297    0.0000 C   0  0  0  0  0  0  0  0  0  0  0  0
    0.5988    2.9427    0.0000 C   0  0  0  0  0  0  0  0  0  0  0  0
    0.9999    3.6637    0.0000 C   0  0  0  0  0  0  0  0  0  0  0  0
    1.8248    3.6767    0.0000 C   0  0  0  0  0  0  0  0  0  0  0  0
    2.2486    2.9689    0.0000 C   0  0  0  0  0  0  0  0  0  0  0  0
    1.8475    2.2480    0.0000 C   0  0  0  0  0  0  0  0  0  0  0  0
    1.0226    2.2349    0.0000 C   0  0  0  0  0  0  0  0  0  0  0  0
   -1.4295    0.7669    0.0000 C   0  0  0  0  0  0  0  0  0  0  0  0
   -1.8532    1.4747    0.0000 O   0  0  0  0  0  0  0  0  0  0  0  0
   -1.8306    0.0460    0.0000 C   0  0  0  0  0  0  0  0  0  0  0  0
   -2.6555    0.0329    0.0000 O   0  0  0  0  0  0  0  0  0  0  0  0
   -3.4341   -0.2398    0.0000 C   0  0  0  0  0  0  0  0  0  0  0  0
   -3.5873   -1.0505    0.0000 C   0  0  0  0  0  0  0  0  0  0  0  0
   -2.9618   -1.5884    0.0000 C   0  0  0  0  0  0  0  0  0  0  0  0
   -3.1149   -2.3991    0.0000 C   0  0  0  0  0  0  0  0  0  0  0  0
   -3.8936   -2.6718    0.0000 C   0  0  0  0  0  0  0  0  0  0  0  0
   -4.5190   -2.1338    0.0000 C   0  0  0  0  0  0  0  0  0  0  0  0
   -4.3659   -1.3232    0.0000 C   0  0  0  0  0  0  0  0  0  0  0  0
   -1.4068   -0.6619    0.0000 C   0  0  0  0  0  0  0  0  0  0  0  0
   -1.8079   -1.3828    0.0000 N   0  0  0  0  0  0  0  0  0  0  0  0
   -1.6589   -2.1942    0.0000 N   0  3  0  0  0  0  0  0  0  0  0  0
   -1.5099   -3.0057    0.0000 N   0  5  0  0  0  0  0  0  0  0  0  0
   -0.1581   -1.3566    0.0000 O   0  0  0  0  0  0  0  0  0  0  0  0
    0.6508   -1.5041    0.0000 C   0  0  0  0  0  0  0  0  0  0  0  0
    0.9285   -2.2809    0.0000 C   0  0  0  0  0  0  0  0  0  0  0  0
    1.7401   -2.4289    0.0000 O   0  0  0  0  0  0  0  0  0  0  0  0
    2.2740   -1.8000    0.0000 C   0  0  0  0  0  0  0  0  0  0  0  0
    1.9963   -1.0231    0.0000 C   0  0  0  0  0  0  0  0  0  0  0  0
    1.1847   -0.8752    0.0000 C   0  0  0  0  0  0  0  0  0  0  0  0
    0.3963   -2.9077    0.0000 C   0  0  0  0  0  0  0  0  0  0  0  0
    2.5285   -0.3963    0.0000 O   0  0  0  0  0  0  0  0  0  0  0  0
    0.9080   -0.1009    0.0000 O   0  0  0  0  0  0  0  0  0  0  0  0
    1.0338    0.7116    0.0000 C   0  0  0  0  0  0  0  0  0  0  0  0
    3.3374   -0.5438    0.0000 C   0  0  0  0  0  0  0  0  0  0  0  0
    1.8004    1.0089    0.0000 C   0  0  0  0  0  0  0  0  0  0  0  0
    2.4506    0.5012    0.0000 C   0  0  0  0  0  0  0  0  0  0  0  0
    3.2268    0.7786    0.0000 C   0  0  0  0  0  0  0  0  0  0  0  0
    3.3528    1.5638    0.0000 C   0  0  0  0  0  0  0  0  0  0  0  0
    2.7026    2.0716    0.0000 C   0  0  0  0  0  0  0  0  0  0  0  0
    1.9264    1.7942    0.0000 C   0  0  0  0  0  0  0  0  0  0  0  0
    3.8695    0.0830    0.0000 C   0  0  0  0  0  0  0  0  0  0  0  0
    3.6141   -1.3180    0.0000 O   0  0  0  0  0  0  0  0  0  0  0  0
    4.6812   -0.0649    0.0000 C   0  0  0  0  0  0  0  0  0  0  0  0
    5.2151    0.5640    0.0000 C   0  0  0  0  0  0  0  0  0  0  0  0
    4.9374    1.3408    0.0000 C   0  0  0  0  0  0  0  0  0  0  0  0
    4.1258    1.4888    0.0000 C   0  0  0  0  0  0  0  0  0  0  0  0
    3.5918    0.8599    0.0000 C   0  0  0  0  0  0  0  0  0  0  0  0
    3.0829   -1.9474    0.0000 O   0  0  0  0  0  0  0  0  0  0  0  0
   -0.4126   -2.7603    0.0000 O   0  0  0  0  0  0  0  0  0  0  0  0
    0.6731   -3.6820    0.0000 O   0  0  0  0  0  0  0  0  0  0  0  0
    0.1409   -4.3088    0.0000 C   0  0  0  0  0  0  0  0  0  0  0  0
   -2.6781    1.4616    0.0000 C   0  0  0  0  0  0  0  0  0  0  0  0
   -3.1019    2.1695    0.0000 C   0  0  0  0  0  0  0  0  0  0  0  0
   -2.7123    2.8967    0.0000 C   0  0  0  0  0  0  0  0  0  0  0  0
   -3.1472    3.5977    0.0000 C   0  0  0  0  0  0  0  0  0  0  0  0
   -3.9718    3.5977    0.0000 C   0  0  0  0  0  0  0  0  0  0  0  0
   -4.3614    2.8967    0.0000 C   0  0  0  0  0  0  0  0  0  0  0  0
   -3.9265    2.1695    0.0000 C   0  0  0  0  0  0  0  0  0  0  0  0
   -4.3901    4.3088    0.0000 O   0  0  0  0  0  0  0  0  0  0  0  0
   -5.2151    4.3021    0.0000 C   0  0  0  0  0  0  0  0  0  0  0  0
    3.3606   -2.7243    0.0000 C   0  0  0  0  0  0  0  0  0  0  0  0
    2.8267   -3.3532    0.0000 C   0  0  0  0  0  0  0  0  0  0  0  0
    4.1722   -2.8723    0.0000 N   0  0  0  0  0  0  0  0  0  0  0  0
    2.0150   -3.2053    0.0000 Cl  0  0  0  0  0  0  0  0  0  0  0  0
    3.1043   -4.1301    0.0000 Cl  0  0  0  0  0  0  0  0  0  0  0  0
    2.2927   -3.9821    0.0000 Cl  0  0  0  0  0  0  0  0  0  0  0  0
  1 28  1  6      
  1  2  1  0      
  2  3  1  0      
  3  4  1  1      
  4  5  1  0      
  5  6  1  0      
  6  7  1  0      
  7  8  2  0      
  8  9  1  0      
  9 10  2  0      
 10 11  1  0      
 11 12  2  0      
  7 12  1  0      
  3 13  1  0      
 13 14  1  6      
 13 15  1  0      
 15 16  1  1      
 16 17  1  0      
 17 18  1  0      
 18 19  2  0      
 19 20  1  0      
 20 21  2  0      
 21 22  1  0      
 22 23  2  0      
 18 23  1  0      
 15 24  1  0      
  1 24  1  0      
 24 25  1  6      
 25 26  2  0      
 26 27  2  0      
 29 28  1  1      
 29 30  1  0      
 30 31  1  0      
 31 32  1  0      
 32 33  1  0      
 33 34  1  0      
 34 29  1  0      
 30 35  1  1      
 33 36  1  1      
 34 37  1  6      
 32 53  1  0      
 37 38  1  0      
 36 39  1  0      
 38 40  1  0      
 40 41  2  0      
 41 42  1  0      
 42 43  2  0      
 43 44  1  0      
 44 45  2  0      
 45 40  1  0      
 39 46  1  0      
 39 47  2  0      
 46 48  2  0      
 48 49  1  0      
 49 50  2  0      
 50 51  1  0      
 51 52  2  0      
 52 46  1  0      
 35 54  2  0      
 35 55  1  0      
 55 56  1  0      
 14 57  1  0      
 57 58  1  0      
 58 59  2  0      
 59 60  1  0      
 60 61  2  0      
 61 62  1  0      
 62 63  2  0      
 63 58  1  0      
 61 64  1  0      
 64 65  1  0      
 53 66  1  0      
 66 67  1  0      
 66 68  2  0      
 67 69  1  0      
 67 70  1  0      
 67 71  1  0      
M  CHG  2  26   1  27  -1
M  END
