# Supplementary material for: Tetrasaccharide iteration synthesis of a heparin-like dodecasaccharide and radiolabelling for in vivo tissue distribution studies
Source: Springer Nature journal article supplement (doi:10.1038/ncomms3016), 2013-07-05
Supplement: 41467_2013_BFncomms3016_MOESM7_ESM.mol [file 41467_2013_BFncomms3016_MOESM7_ESM.mol]

  ChemDraw06041310152D

126139  0  0  0  0  0  0  0  0999 V2000
   -3.0500    1.0623    0.0000 C   0  0  0  0  0  0  0  0  0  0  0  0
   -2.6489    1.7832    0.0000 O   0  0  0  0  0  0  0  0  0  0  0  0
   -3.0726    2.4911    0.0000 C   0  0  0  0  0  0  0  0  0  0  0  0
   -2.6715    3.2120    0.0000 C   0  0  0  0  0  0  0  0  0  0  0  0
   -3.0953    3.9198    0.0000 O   0  0  0  0  0  0  0  0  0  0  0  0
   -2.6942    4.6407    0.0000 C   0  0  0  0  0  0  0  0  0  0  0  0
   -1.8693    4.6538    0.0000 C   0  0  0  0  0  0  0  0  0  0  0  0
   -1.4682    5.3747    0.0000 C   0  0  0  0  0  0  0  0  0  0  0  0
   -0.6433    5.3878    0.0000 C   0  0  0  0  0  0  0  0  0  0  0  0
   -0.2195    4.6800    0.0000 C   0  0  0  0  0  0  0  0  0  0  0  0
   -0.6206    3.9591    0.0000 C   0  0  0  0  0  0  0  0  0  0  0  0
   -1.4455    3.9460    0.0000 C   0  0  0  0  0  0  0  0  0  0  0  0
   -3.8975    2.4780    0.0000 C   0  0  0  0  0  0  0  0  0  0  0  0
   -4.3213    3.1858    0.0000 O   0  0  0  0  0  0  0  0  0  0  0  0
   -4.2986    1.7571    0.0000 C   0  0  0  0  0  0  0  0  0  0  0  0
   -5.1235    1.7440    0.0000 O   0  0  0  0  0  0  0  0  0  0  0  0
   -5.9022    1.4713    0.0000 C   0  0  0  0  0  0  0  0  0  0  0  0
   -6.0553    0.6606    0.0000 C   0  0  0  0  0  0  0  0  0  0  0  0
   -5.4299    0.1226    0.0000 C   0  0  0  0  0  0  0  0  0  0  0  0
   -5.5830   -0.6880    0.0000 C   0  0  0  0  0  0  0  0  0  0  0  0
   -6.3616   -0.9607    0.0000 C   0  0  0  0  0  0  0  0  0  0  0  0
   -6.9871   -0.4227    0.0000 C   0  0  0  0  0  0  0  0  0  0  0  0
   -6.8340    0.3879    0.0000 C   0  0  0  0  0  0  0  0  0  0  0  0
   -3.8749    1.0492    0.0000 C   0  0  0  0  0  0  0  0  0  0  0  0
   -4.2760    0.3283    0.0000 N   0  0  0  0  0  0  0  0  0  0  0  0
   -4.1270   -0.4831    0.0000 N   0  3  0  0  0  0  0  0  0  0  0  0
   -3.9780   -1.2946    0.0000 N   0  5  0  0  0  0  0  0  0  0  0  0
   -2.6262    0.3545    0.0000 O   0  0  0  0  0  0  0  0  0  0  0  0
   -1.8173    0.2070    0.0000 C   0  0  0  0  0  0  0  0  0  0  0  0
   -1.5396   -0.5699    0.0000 C   0  0  0  0  0  0  0  0  0  0  0  0
   -0.7280   -0.7178    0.0000 O   0  0  0  0  0  0  0  0  0  0  0  0
   -0.1941   -0.0889    0.0000 C   0  0  0  0  0  0  0  0  0  0  0  0
   -0.4717    0.6880    0.0000 C   0  0  0  0  0  0  0  0  0  0  0  0
   -1.2834    0.8359    0.0000 C   0  0  0  0  0  0  0  0  0  0  0  0
   -2.0718   -1.1967    0.0000 C   0  0  0  0  0  0  0  0  0  0  0  0
    0.0604    1.3148    0.0000 O   0  0  0  0  0  0  0  0  0  0  0  0
   -1.5601    1.6102    0.0000 O   0  0  0  0  0  0  0  0  0  0  0  0
   -1.4343    2.4227    0.0000 C   0  0  0  0  0  0  0  0  0  0  0  0
    0.8693    1.1673    0.0000 C   0  0  0  0  0  0  0  0  0  0  0  0
   -0.6677    2.7200    0.0000 C   0  0  0  0  0  0  0  0  0  0  0  0
   -0.0175    2.2122    0.0000 C   0  0  0  0  0  0  0  0  0  0  0  0
    0.7587    2.4897    0.0000 C   0  0  0  0  0  0  0  0  0  0  0  0
    0.8847    3.2749    0.0000 C   0  0  0  0  0  0  0  0  0  0  0  0
    0.2345    3.7827    0.0000 C   0  0  0  0  0  0  0  0  0  0  0  0
   -0.5417    3.5052    0.0000 C   0  0  0  0  0  0  0  0  0  0  0  0
    1.4015    1.7941    0.0000 C   0  0  0  0  0  0  0  0  0  0  0  0
    1.1461    0.3931    0.0000 O   0  0  0  0  0  0  0  0  0  0  0  0
    2.2131    1.6462    0.0000 C   0  0  0  0  0  0  0  0  0  0  0  0
    2.7470    2.2751    0.0000 C   0  0  0  0  0  0  0  0  0  0  0  0
    2.4693    3.0519    0.0000 C   0  0  0  0  0  0  0  0  0  0  0  0
    1.6577    3.1999    0.0000 C   0  0  0  0  0  0  0  0  0  0  0  0
    1.1238    2.5710    0.0000 C   0  0  0  0  0  0  0  0  0  0  0  0
    1.8862   -2.3599    0.0000 C   0  0  0  0  0  0  0  0  0  0  0  0
    2.2873   -1.6390    0.0000 O   0  0  0  0  0  0  0  0  0  0  0  0
    1.8635   -0.9311    0.0000 C   0  0  0  0  0  0  0  0  0  0  0  0
    2.2646   -0.2102    0.0000 C   0  0  0  0  0  0  0  0  0  0  0  0
    1.8409    0.4976    0.0000 O   0  0  0  0  0  0  0  0  0  0  0  0
    2.2420    1.2186    0.0000 C   0  0  0  0  0  0  0  0  0  0  0  0
    3.0669    1.2317    0.0000 C   0  0  0  0  0  0  0  0  0  0  0  0
    3.4680    1.9526    0.0000 C   0  0  0  0  0  0  0  0  0  0  0  0
    4.2929    1.9657    0.0000 C   0  0  0  0  0  0  0  0  0  0  0  0
    4.7167    1.2578    0.0000 C   0  0  0  0  0  0  0  0  0  0  0  0
    4.3155    0.5369    0.0000 C   0  0  0  0  0  0  0  0  0  0  0  0
    3.4907    0.5238    0.0000 C   0  0  0  0  0  0  0  0  0  0  0  0
    1.0386   -0.9442    0.0000 C   0  0  0  0  0  0  0  0  0  0  0  0
    0.6148   -0.2364    0.0000 O   0  0  0  0  0  0  0  0  0  0  0  0
    0.6375   -1.6651    0.0000 C   0  0  0  0  0  0  0  0  0  0  0  0
   -0.1874   -1.6782    0.0000 O   0  0  0  0  0  0  0  0  0  0  0  0
   -0.9660   -1.9509    0.0000 C   0  0  0  0  0  0  0  0  0  0  0  0
   -1.1192   -2.7616    0.0000 C   0  0  0  0  0  0  0  0  0  0  0  0
   -0.4937   -3.2995    0.0000 C   0  0  0  0  0  0  0  0  0  0  0  0
   -0.6469   -4.1102    0.0000 C   0  0  0  0  0  0  0  0  0  0  0  0
   -1.4255   -4.3829    0.0000 C   0  0  0  0  0  0  0  0  0  0  0  0
   -2.0510   -3.8449    0.0000 C   0  0  0  0  0  0  0  0  0  0  0  0
   -1.8978   -3.0343    0.0000 C   0  0  0  0  0  0  0  0  0  0  0  0
    1.0613   -2.3730    0.0000 C   0  0  0  0  0  0  0  0  0  0  0  0
    0.6602   -3.0939    0.0000 N   0  0  0  0  0  0  0  0  0  0  0  0
    0.9311   -3.8731    0.0000 N   0  3  0  0  0  0  0  0  0  0  0  0
    1.2021   -4.6523    0.0000 N   0  5  0  0  0  0  0  0  0  0  0  0
   -2.8807   -1.0492    0.0000 O   0  0  0  0  0  0  0  0  0  0  0  0
   -1.7950   -1.9709    0.0000 O   0  0  0  0  0  0  0  0  0  0  0  0
   -2.3272   -2.5977    0.0000 C   0  0  0  0  0  0  0  0  0  0  0  0
    2.3100   -3.0677    0.0000 O   0  0  0  0  0  0  0  0  0  0  0  0
    3.1189   -3.2152    0.0000 C   0  0  0  0  0  0  0  0  0  0  0  0
    3.3965   -3.9920    0.0000 C   0  0  0  0  0  0  0  0  0  0  0  0
    4.2082   -4.1400    0.0000 O   0  0  0  0  0  0  0  0  0  0  0  0
    4.7421   -3.5111    0.0000 C   0  0  0  0  0  0  0  0  0  0  0  0
    4.4644   -2.7342    0.0000 C   0  0  0  0  0  0  0  0  0  0  0  0
    3.6528   -2.5863    0.0000 C   0  0  0  0  0  0  0  0  0  0  0  0
    2.8644   -4.6188    0.0000 C   0  0  0  0  0  0  0  0  0  0  0  0
    4.9966   -2.1074    0.0000 O   0  0  0  0  0  0  0  0  0  0  0  0
    3.3760   -1.8120    0.0000 O   0  0  0  0  0  0  0  0  0  0  0  0
    3.5019   -0.9995    0.0000 C   0  0  0  0  0  0  0  0  0  0  0  0
    5.8055   -2.2549    0.0000 C   0  0  0  0  0  0  0  0  0  0  0  0
    4.2684   -0.7021    0.0000 C   0  0  0  0  0  0  0  0  0  0  0  0
    4.9187   -1.2099    0.0000 C   0  0  0  0  0  0  0  0  0  0  0  0
    5.6949   -0.9325    0.0000 C   0  0  0  0  0  0  0  0  0  0  0  0
    5.8209   -0.1472    0.0000 C   0  0  0  0  0  0  0  0  0  0  0  0
    5.1706    0.3605    0.0000 C   0  0  0  0  0  0  0  0  0  0  0  0
    4.3944    0.0831    0.0000 C   0  0  0  0  0  0  0  0  0  0  0  0
    6.3376   -1.6281    0.0000 C   0  0  0  0  0  0  0  0  0  0  0  0
    6.0822   -3.0291    0.0000 O   0  0  0  0  0  0  0  0  0  0  0  0
    7.1492   -1.7760    0.0000 C   0  0  0  0  0  0  0  0  0  0  0  0
    7.6832   -1.1471    0.0000 C   0  0  0  0  0  0  0  0  0  0  0  0
    7.4055   -0.3702    0.0000 C   0  0  0  0  0  0  0  0  0  0  0  0
    6.5939   -0.2223    0.0000 C   0  0  0  0  0  0  0  0  0  0  0  0
    6.0599   -0.8512    0.0000 C   0  0  0  0  0  0  0  0  0  0  0  0
    2.0555   -4.4714    0.0000 O   0  0  0  0  0  0  0  0  0  0  0  0
    3.1411   -5.3931    0.0000 O   0  0  0  0  0  0  0  0  0  0  0  0
    2.6090   -6.0199    0.0000 C   0  0  0  0  0  0  0  0  0  0  0  0
    5.5510   -3.6585    0.0000 S   0  0  0  0  0  0  0  0  0  0  0  0
    5.8735   -4.4424    0.0000 C   0  0  0  0  0  0  0  0  0  0  0  0
    5.3696   -5.0957    0.0000 C   0  0  0  0  0  0  0  0  0  0  0  0
    5.6835   -5.8586    0.0000 C   0  0  0  0  0  0  0  0  0  0  0  0
    6.5012   -5.9683    0.0000 C   0  0  0  0  0  0  0  0  0  0  0  0
    7.0050   -5.3150    0.0000 C   0  0  0  0  0  0  0  0  0  0  0  0
    6.6911   -4.5520    0.0000 C   0  0  0  0  0  0  0  0  0  0  0  0
   -5.1462    3.1727    0.0000 C   0  0  0  0  0  0  0  0  0  0  0  0
   -5.5700    3.8806    0.0000 C   0  0  0  0  0  0  0  0  0  0  0  0
   -5.1803    4.6078    0.0000 C   0  0  0  0  0  0  0  0  0  0  0  0
   -5.6153    5.3088    0.0000 C   0  0  0  0  0  0  0  0  0  0  0  0
   -6.4399    5.3088    0.0000 C   0  0  0  0  0  0  0  0  0  0  0  0
   -6.8295    4.6078    0.0000 C   0  0  0  0  0  0  0  0  0  0  0  0
   -6.3946    3.8806    0.0000 C   0  0  0  0  0  0  0  0  0  0  0  0
   -6.8582    6.0199    0.0000 O   0  0  0  0  0  0  0  0  0  0  0  0
   -7.6832    6.0131    0.0000 C   0  0  0  0  0  0  0  0  0  0  0  0
  1 28  1  6      
  1  2  1  0      
  2  3  1  0      
  3  4  1  1      
  4  5  1  0      
  5  6  1  0      
  6  7  1  0      
  7  8  2  0      
  8  9  1  0      
  9 10  2  0      
 10 11  1  0      
 11 12  2  0      
  7 12  1  0      
  3 13  1  0      
 13 14  1  6      
 13 15  1  0      
 15 16  1  1      
 16 17  1  0      
 17 18  1  0      
 18 19  2  0      
 19 20  1  0      
 20 21  2  0      
 21 22  1  0      
 22 23  2  0      
 18 23  1  0      
 15 24  1  0      
  1 24  1  0      
 24 25  1  6      
 25 26  2  0      
 26 27  2  0      
 29 28  1  1      
 29 30  1  0      
 30 31  1  0      
 31 32  1  0      
 32 33  1  0      
 33 34  1  0      
 34 29  1  0      
 30 35  1  1      
 33 36  1  1      
 34 37  1  6      
 32 66  1  6      
 37 38  1  0      
 36 39  1  0      
 38 40  1  0      
 40 41  2  0      
 41 42  1  0      
 42 43  2  0      
 43 44  1  0      
 44 45  2  0      
 45 40  1  0      
 39 46  1  0      
 39 47  2  0      
 46 48  2  0      
 48 49  1  0      
 49 50  2  0      
 50 51  1  0      
 51 52  2  0      
 52 46  1  0      
 53 83  1  6      
 53 54  1  0      
 54 55  1  0      
 55 56  1  1      
 56 57  1  0      
 57 58  1  0      
 58 59  1  0      
 59 60  2  0      
 60 61  1  0      
 61 62  2  0      
 62 63  1  0      
 63 64  2  0      
 59 64  1  0      
 55 65  1  0      
 65 66  1  6      
 65 67  1  0      
 67 68  1  1      
 68 69  1  0      
 69 70  1  0      
 70 71  2  0      
 71 72  1  0      
 72 73  2  0      
 73 74  1  0      
 74 75  2  0      
 70 75  1  0      
 67 76  1  0      
 53 76  1  0      
 76 77  1  6      
 77 78  2  0      
 78 79  2  0      
 35 80  2  0      
 35 81  1  0      
 81 82  1  0      
 84 83  1  1      
 84 85  1  0      
 85 86  1  0      
 86 87  1  0      
 87 88  1  0      
 88 89  1  0      
 89 84  1  0      
 85 90  1  1      
 88 91  1  1      
 89 92  1  6      
 87111  1  0      
 92 93  1  0      
 91 94  1  0      
 93 95  1  0      
 95 96  2  0      
 96 97  1  0      
 97 98  2  0      
 98 99  1  0      
 99100  2  0      
100 95  1  0      
 94101  1  0      
 94102  2  0      
101103  2  0      
103104  1  0      
104105  2  0      
105106  1  0      
106107  2  0      
107101  1  0      
 90108  2  0      
 90109  1  0      
109110  1  0      
111112  1  0      
112113  2  0      
113114  1  0      
114115  2  0      
115116  1  0      
116117  2  0      
117112  1  0      
 14118  1  0      
118119  1  0      
119120  2  0      
120121  1  0      
121122  2  0      
122123  1  0      
123124  2  0      
124119  1  0      
122125  1  0      
125126  1  0      
M  CHG  4  26   1  27  -1  78   1  79  -1
M  END
