# Supplementary material for: Tetrasaccharide iteration synthesis of a heparin-like dodecasaccharide and radiolabelling for in vivo tissue distribution studies
Source: Springer Nature journal article supplement (doi:10.1038/ncomms3016), 2013-07-05
Supplement: 41467_2013_BFncomms3016_MOESM11_ESM.mol [file 41467_2013_BFncomms3016_MOESM11_ESM.mol]

  ChemDraw06041310152D

123135  0  0  0  0  0  0  0  0999 V2000
   -3.3980    1.3783    0.0000 C   0  0  0  0  0  0  0  0  0  0  0  0
   -2.9969    2.0992    0.0000 O   0  0  0  0  0  0  0  0  0  0  0  0
   -3.4207    2.8071    0.0000 C   0  0  0  0  0  0  0  0  0  0  0  0
   -3.0195    3.5280    0.0000 C   0  0  0  0  0  0  0  0  0  0  0  0
   -3.4433    4.2358    0.0000 O   0  0  0  0  0  0  0  0  0  0  0  0
   -3.0422    4.9568    0.0000 C   0  0  0  0  0  0  0  0  0  0  0  0
   -2.2173    4.9698    0.0000 C   0  0  0  0  0  0  0  0  0  0  0  0
   -1.8162    5.6908    0.0000 C   0  0  0  0  0  0  0  0  0  0  0  0
   -0.9913    5.7039    0.0000 C   0  0  0  0  0  0  0  0  0  0  0  0
   -0.5675    4.9960    0.0000 C   0  0  0  0  0  0  0  0  0  0  0  0
   -0.9686    4.2751    0.0000 C   0  0  0  0  0  0  0  0  0  0  0  0
   -1.7935    4.2620    0.0000 C   0  0  0  0  0  0  0  0  0  0  0  0
   -4.2456    2.7940    0.0000 C   0  0  0  0  0  0  0  0  0  0  0  0
   -4.6693    3.5018    0.0000 O   0  0  0  0  0  0  0  0  0  0  0  0
   -4.6467    2.0731    0.0000 C   0  0  0  0  0  0  0  0  0  0  0  0
   -5.4716    2.0600    0.0000 O   0  0  0  0  0  0  0  0  0  0  0  0
   -6.2502    1.7873    0.0000 C   0  0  0  0  0  0  0  0  0  0  0  0
   -6.4034    0.9766    0.0000 C   0  0  0  0  0  0  0  0  0  0  0  0
   -5.7779    0.4387    0.0000 C   0  0  0  0  0  0  0  0  0  0  0  0
   -5.9310   -0.3720    0.0000 C   0  0  0  0  0  0  0  0  0  0  0  0
   -6.7097   -0.6447    0.0000 C   0  0  0  0  0  0  0  0  0  0  0  0
   -7.3351   -0.1067    0.0000 C   0  0  0  0  0  0  0  0  0  0  0  0
   -7.1820    0.7039    0.0000 C   0  0  0  0  0  0  0  0  0  0  0  0
   -4.2229    1.3652    0.0000 C   0  0  0  0  0  0  0  0  0  0  0  0
   -4.6240    0.6443    0.0000 N   0  0  0  0  0  0  0  0  0  0  0  0
   -4.4750   -0.1671    0.0000 N   0  3  0  0  0  0  0  0  0  0  0  0
   -4.3260   -0.9786    0.0000 N   0  5  0  0  0  0  0  0  0  0  0  0
   -2.9742    0.6705    0.0000 O   0  0  0  0  0  0  0  0  0  0  0  0
   -2.1653    0.5230    0.0000 C   0  0  0  0  0  0  0  0  0  0  0  0
   -1.8876   -0.2538    0.0000 C   0  0  0  0  0  0  0  0  0  0  0  0
   -1.0760   -0.4018    0.0000 O   0  0  0  0  0  0  0  0  0  0  0  0
   -0.5421    0.2271    0.0000 C   0  0  0  0  0  0  0  0  0  0  0  0
   -0.8198    1.0040    0.0000 C   0  0  0  0  0  0  0  0  0  0  0  0
   -1.6314    1.1519    0.0000 C   0  0  0  0  0  0  0  0  0  0  0  0
   -2.4198   -0.8806    0.0000 C   0  0  0  0  0  0  0  0  0  0  0  0
   -0.2876    1.6308    0.0000 O   0  0  0  0  0  0  0  0  0  0  0  0
   -1.9081    1.9262    0.0000 O   0  0  0  0  0  0  0  0  0  0  0  0
   -1.7823    2.7387    0.0000 C   0  0  0  0  0  0  0  0  0  0  0  0
    0.5213    1.4833    0.0000 C   0  0  0  0  0  0  0  0  0  0  0  0
   -1.0157    3.0360    0.0000 C   0  0  0  0  0  0  0  0  0  0  0  0
   -0.3655    2.5283    0.0000 C   0  0  0  0  0  0  0  0  0  0  0  0
    0.4107    2.8057    0.0000 C   0  0  0  0  0  0  0  0  0  0  0  0
    0.5367    3.5909    0.0000 C   0  0  0  0  0  0  0  0  0  0  0  0
   -0.1135    4.0987    0.0000 C   0  0  0  0  0  0  0  0  0  0  0  0
   -0.8898    3.8213    0.0000 C   0  0  0  0  0  0  0  0  0  0  0  0
    1.0534    2.1101    0.0000 C   0  0  0  0  0  0  0  0  0  0  0  0
    0.7980    0.7091    0.0000 O   0  0  0  0  0  0  0  0  0  0  0  0
    1.8650    1.9622    0.0000 C   0  0  0  0  0  0  0  0  0  0  0  0
    2.3990    2.5911    0.0000 C   0  0  0  0  0  0  0  0  0  0  0  0
    2.1213    3.3680    0.0000 C   0  0  0  0  0  0  0  0  0  0  0  0
    1.3097    3.5159    0.0000 C   0  0  0  0  0  0  0  0  0  0  0  0
    0.7757    2.8870    0.0000 C   0  0  0  0  0  0  0  0  0  0  0  0
    1.5381   -2.0439    0.0000 C   0  0  0  0  0  0  0  0  0  0  0  0
    1.9393   -1.3229    0.0000 O   0  0  0  0  0  0  0  0  0  0  0  0
    1.5155   -0.6151    0.0000 C   0  0  0  0  0  0  0  0  0  0  0  0
    1.9166    0.1058    0.0000 C   0  0  0  0  0  0  0  0  0  0  0  0
    1.4928    0.8137    0.0000 O   0  0  0  0  0  0  0  0  0  0  0  0
    1.8939    1.5346    0.0000 C   0  0  0  0  0  0  0  0  0  0  0  0
    2.7188    1.5477    0.0000 C   0  0  0  0  0  0  0  0  0  0  0  0
    3.1200    2.2686    0.0000 C   0  0  0  0  0  0  0  0  0  0  0  0
    3.9449    2.2817    0.0000 C   0  0  0  0  0  0  0  0  0  0  0  0
    4.3686    1.5738    0.0000 C   0  0  0  0  0  0  0  0  0  0  0  0
    3.9675    0.8529    0.0000 C   0  0  0  0  0  0  0  0  0  0  0  0
    3.1426    0.8398    0.0000 C   0  0  0  0  0  0  0  0  0  0  0  0
    0.6906   -0.6282    0.0000 C   0  0  0  0  0  0  0  0  0  0  0  0
    0.2668    0.0797    0.0000 O   0  0  0  0  0  0  0  0  0  0  0  0
    0.2895   -1.3491    0.0000 C   0  0  0  0  0  0  0  0  0  0  0  0
   -0.5354   -1.3622    0.0000 O   0  0  0  0  0  0  0  0  0  0  0  0
   -1.3141   -1.6349    0.0000 C   0  0  0  0  0  0  0  0  0  0  0  0
   -1.4672   -2.4455    0.0000 C   0  0  0  0  0  0  0  0  0  0  0  0
   -0.8417   -2.9835    0.0000 C   0  0  0  0  0  0  0  0  0  0  0  0
   -0.9949   -3.7942    0.0000 C   0  0  0  0  0  0  0  0  0  0  0  0
   -1.7735   -4.0669    0.0000 C   0  0  0  0  0  0  0  0  0  0  0  0
   -2.3990   -3.5289    0.0000 C   0  0  0  0  0  0  0  0  0  0  0  0
   -2.2458   -2.7182    0.0000 C   0  0  0  0  0  0  0  0  0  0  0  0
    0.7133   -2.0569    0.0000 C   0  0  0  0  0  0  0  0  0  0  0  0
    0.3121   -2.7779    0.0000 N   0  0  0  0  0  0  0  0  0  0  0  0
    0.5831   -3.5571    0.0000 N   0  3  0  0  0  0  0  0  0  0  0  0
    0.8541   -4.3363    0.0000 N   0  5  0  0  0  0  0  0  0  0  0  0
   -3.2287   -0.7332    0.0000 O   0  0  0  0  0  0  0  0  0  0  0  0
   -2.1430   -1.6549    0.0000 O   0  0  0  0  0  0  0  0  0  0  0  0
   -2.6752   -2.2817    0.0000 C   0  0  0  0  0  0  0  0  0  0  0  0
    1.9619   -2.7517    0.0000 O   0  0  0  0  0  0  0  0  0  0  0  0
    2.7708   -2.8991    0.0000 C   0  0  0  0  0  0  0  0  0  0  0  0
    3.0485   -3.6760    0.0000 C   0  0  0  0  0  0  0  0  0  0  0  0
    3.8601   -3.8240    0.0000 O   0  0  0  0  0  0  0  0  0  0  0  0
    4.3941   -3.1950    0.0000 C   0  0  0  0  0  0  0  0  0  0  0  0
    4.1164   -2.4182    0.0000 C   0  0  0  0  0  0  0  0  0  0  0  0
    3.3048   -2.2702    0.0000 C   0  0  0  0  0  0  0  0  0  0  0  0
    2.5164   -4.3028    0.0000 C   0  0  0  0  0  0  0  0  0  0  0  0
    4.6485   -1.7914    0.0000 O   0  0  0  0  0  0  0  0  0  0  0  0
    3.0280   -1.4960    0.0000 O   0  0  0  0  0  0  0  0  0  0  0  0
    3.1538   -0.6834    0.0000 C   0  0  0  0  0  0  0  0  0  0  0  0
    5.4574   -1.9388    0.0000 C   0  0  0  0  0  0  0  0  0  0  0  0
    3.9204   -0.3861    0.0000 C   0  0  0  0  0  0  0  0  0  0  0  0
    4.5706   -0.8939    0.0000 C   0  0  0  0  0  0  0  0  0  0  0  0
    5.3468   -0.6164    0.0000 C   0  0  0  0  0  0  0  0  0  0  0  0
    5.4728    0.1688    0.0000 C   0  0  0  0  0  0  0  0  0  0  0  0
    4.8226    0.6766    0.0000 C   0  0  0  0  0  0  0  0  0  0  0  0
    4.0464    0.3991    0.0000 C   0  0  0  0  0  0  0  0  0  0  0  0
    5.9896   -1.3120    0.0000 C   0  0  0  0  0  0  0  0  0  0  0  0
    5.7342   -2.7131    0.0000 O   0  0  0  0  0  0  0  0  0  0  0  0
    6.8012   -1.4600    0.0000 C   0  0  0  0  0  0  0  0  0  0  0  0
    7.3351   -0.8311    0.0000 C   0  0  0  0  0  0  0  0  0  0  0  0
    7.0575   -0.0542    0.0000 C   0  0  0  0  0  0  0  0  0  0  0  0
    6.2458    0.0937    0.0000 C   0  0  0  0  0  0  0  0  0  0  0  0
    5.7119   -0.5352    0.0000 C   0  0  0  0  0  0  0  0  0  0  0  0
    1.7075   -4.1554    0.0000 O   0  0  0  0  0  0  0  0  0  0  0  0
    2.7931   -5.0771    0.0000 O   0  0  0  0  0  0  0  0  0  0  0  0
    2.2610   -5.7039    0.0000 C   0  0  0  0  0  0  0  0  0  0  0  0
    5.2030   -3.3425    0.0000 S   0  0  0  0  0  0  0  0  0  0  0  0
    5.5254   -4.1263    0.0000 C   0  0  0  0  0  0  0  0  0  0  0  0
    5.0216   -4.7796    0.0000 C   0  0  0  0  0  0  0  0  0  0  0  0
    5.3355   -5.5426    0.0000 C   0  0  0  0  0  0  0  0  0  0  0  0
    6.1532   -5.6523    0.0000 C   0  0  0  0  0  0  0  0  0  0  0  0
    6.6570   -4.9990    0.0000 C   0  0  0  0  0  0  0  0  0  0  0  0
    6.3431   -4.2360    0.0000 C   0  0  0  0  0  0  0  0  0  0  0  0
   -5.4942    3.4888    0.0000 C   0  0  0  0  0  0  0  0  0  0  0  0
   -5.8954    2.7678    0.0000 O   0  0  0  0  0  0  0  0  0  0  0  0
   -5.9180    4.1966    0.0000 C   0  0  0  0  0  0  0  0  0  0  0  0
   -6.7429    4.1835    0.0000 Cl  0  0  0  0  0  0  0  0  0  0  0  0
   -5.5169    4.9175    0.0000 Cl  0  0  0  0  0  0  0  0  0  0  0  0
   -6.3418    4.9044    0.0000 Cl  0  0  0  0  0  0  0  0  0  0  0  0
  1 28  1  6      
  1  2  1  0      
  2  3  1  0      
  3  4  1  1      
  4  5  1  0      
  5  6  1  0      
  6  7  1  0      
  7  8  2  0      
  8  9  1  0      
  9 10  2  0      
 10 11  1  0      
 11 12  2  0      
  7 12  1  0      
  3 13  1  0      
 13 14  1  6      
 13 15  1  0      
 15 16  1  1      
 16 17  1  0      
 17 18  1  0      
 18 19  2  0      
 19 20  1  0      
 20 21  2  0      
 21 22  1  0      
 22 23  2  0      
 18 23  1  0      
 15 24  1  0      
  1 24  1  0      
 24 25  1  6      
 25 26  2  0      
 26 27  2  0      
 29 28  1  1      
 29 30  1  0      
 30 31  1  0      
 31 32  1  0      
 32 33  1  0      
 33 34  1  0      
 34 29  1  0      
 30 35  1  1      
 33 36  1  1      
 34 37  1  6      
 32 66  1  6      
 37 38  1  0      
 36 39  1  0      
 38 40  1  0      
 40 41  2  0      
 41 42  1  0      
 42 43  2  0      
 43 44  1  0      
 44 45  2  0      
 45 40  1  0      
 39 46  1  0      
 39 47  2  0      
 46 48  2  0      
 48 49  1  0      
 49 50  2  0      
 50 51  1  0      
 51 52  2  0      
 52 46  1  0      
 53 83  1  6      
 53 54  1  0      
 54 55  1  0      
 55 56  1  1      
 56 57  1  0      
 57 58  1  0      
 58 59  1  0      
 59 60  2  0      
 60 61  1  0      
 61 62  2  0      
 62 63  1  0      
 63 64  2  0      
 59 64  1  0      
 55 65  1  0      
 65 66  1  6      
 65 67  1  0      
 67 68  1  1      
 68 69  1  0      
 69 70  1  0      
 70 71  2  0      
 71 72  1  0      
 72 73  2  0      
 73 74  1  0      
 74 75  2  0      
 70 75  1  0      
 67 76  1  0      
 53 76  1  0      
 76 77  1  6      
 77 78  2  0      
 78 79  2  0      
 35 80  2  0      
 35 81  1  0      
 81 82  1  0      
 84 83  1  1      
 84 85  1  0      
 85 86  1  0      
 86 87  1  0      
 87 88  1  0      
 88 89  1  0      
 89 84  1  0      
 85 90  1  1      
 88 91  1  1      
 89 92  1  6      
 87111  1  0      
 92 93  1  0      
 91 94  1  0      
 93 95  1  0      
 95 96  2  0      
 96 97  1  0      
 97 98  2  0      
 98 99  1  0      
 99100  2  0      
100 95  1  0      
 94101  1  0      
 94102  2  0      
101103  2  0      
103104  1  0      
104105  2  0      
105106  1  0      
106107  2  0      
107101  1  0      
 90108  2  0      
 90109  1  0      
109110  1  0      
111112  1  0      
112113  2  0      
113114  1  0      
114115  2  0      
115116  1  0      
116117  2  0      
117112  1  0      
 14118  1  0      
118119  2  0      
118120  1  0      
120121  1  0      
120122  1  0      
120123  1  0      
M  CHG  4  26   1  27  -1  78   1  79  -1
M  END
