# Supplementary material for: Tetrasaccharide iteration synthesis of a heparin-like dodecasaccharide and radiolabelling for in vivo tissue distribution studies
Source: Springer Nature journal article supplement (doi:10.1038/ncomms3016), 2013-07-05
Supplement: 41467_2013_BFncomms3016_MOESM15_ESM.mol [file 41467_2013_BFncomms3016_MOESM15_ESM.mol]

  ChemDraw06041310152D

249275  0  0  0  0  0  0  0  0999 V2000
   -9.8157    4.6820    0.0000 C   0  0  0  0  0  0  0  0  0  0  0  0
   -9.4145    5.4029    0.0000 O   0  0  0  0  0  0  0  0  0  0  0  0
   -9.8383    6.1108    0.0000 C   0  0  0  0  0  0  0  0  0  0  0  0
   -9.4372    6.8317    0.0000 C   0  0  0  0  0  0  0  0  0  0  0  0
   -9.8610    7.5395    0.0000 O   0  0  0  0  0  0  0  0  0  0  0  0
   -9.4599    8.2604    0.0000 C   0  0  0  0  0  0  0  0  0  0  0  0
   -8.6350    8.2735    0.0000 C   0  0  0  0  0  0  0  0  0  0  0  0
   -8.2338    8.9945    0.0000 C   0  0  0  0  0  0  0  0  0  0  0  0
   -7.4089    9.0075    0.0000 C   0  0  0  0  0  0  0  0  0  0  0  0
   -6.9852    8.2997    0.0000 C   0  0  0  0  0  0  0  0  0  0  0  0
   -7.3863    7.5788    0.0000 C   0  0  0  0  0  0  0  0  0  0  0  0
   -8.2112    7.5657    0.0000 C   0  0  0  0  0  0  0  0  0  0  0  0
  -10.6632    6.0977    0.0000 C   0  0  0  0  0  0  0  0  0  0  0  0
  -11.0870    6.8055    0.0000 O   0  0  0  0  0  0  0  0  0  0  0  0
  -11.0643    5.3768    0.0000 C   0  0  0  0  0  0  0  0  0  0  0  0
  -11.8892    5.3637    0.0000 O   0  0  0  0  0  0  0  0  0  0  0  0
  -12.6679    5.0910    0.0000 C   0  0  0  0  0  0  0  0  0  0  0  0
  -12.8210    4.2803    0.0000 C   0  0  0  0  0  0  0  0  0  0  0  0
  -12.1955    3.7424    0.0000 C   0  0  0  0  0  0  0  0  0  0  0  0
  -12.3487    2.9317    0.0000 C   0  0  0  0  0  0  0  0  0  0  0  0
  -13.1273    2.6590    0.0000 C   0  0  0  0  0  0  0  0  0  0  0  0
  -13.7528    3.1970    0.0000 C   0  0  0  0  0  0  0  0  0  0  0  0
  -13.5996    4.0076    0.0000 C   0  0  0  0  0  0  0  0  0  0  0  0
  -10.6406    4.6689    0.0000 C   0  0  0  0  0  0  0  0  0  0  0  0
  -11.0417    3.9480    0.0000 N   0  0  0  0  0  0  0  0  0  0  0  0
  -10.8927    3.1366    0.0000 N   0  3  0  0  0  0  0  0  0  0  0  0
  -10.7437    2.3251    0.0000 N   0  5  0  0  0  0  0  0  0  0  0  0
   -9.3919    3.9742    0.0000 O   0  0  0  0  0  0  0  0  0  0  0  0
   -8.5830    3.8267    0.0000 C   0  0  0  0  0  0  0  0  0  0  0  0
   -8.3053    3.0498    0.0000 C   0  0  0  0  0  0  0  0  0  0  0  0
   -7.4937    2.9019    0.0000 O   0  0  0  0  0  0  0  0  0  0  0  0
   -6.9597    3.5308    0.0000 C   0  0  0  0  0  0  0  0  0  0  0  0
   -7.2374    4.3077    0.0000 C   0  0  0  0  0  0  0  0  0  0  0  0
   -8.0490    4.4556    0.0000 C   0  0  0  0  0  0  0  0  0  0  0  0
   -8.8374    2.4230    0.0000 C   0  0  0  0  0  0  0  0  0  0  0  0
   -6.7053    4.9345    0.0000 O   0  0  0  0  0  0  0  0  0  0  0  0
   -8.3258    5.2299    0.0000 O   0  0  0  0  0  0  0  0  0  0  0  0
   -8.2000    6.0424    0.0000 C   0  0  0  0  0  0  0  0  0  0  0  0
   -5.8964    4.7870    0.0000 C   0  0  0  0  0  0  0  0  0  0  0  0
   -7.4334    6.3397    0.0000 C   0  0  0  0  0  0  0  0  0  0  0  0
   -6.7832    5.8319    0.0000 C   0  0  0  0  0  0  0  0  0  0  0  0
   -6.0070    6.1094    0.0000 C   0  0  0  0  0  0  0  0  0  0  0  0
   -5.8810    6.8946    0.0000 C   0  0  0  0  0  0  0  0  0  0  0  0
   -6.5312    7.4024    0.0000 C   0  0  0  0  0  0  0  0  0  0  0  0
   -7.3074    7.1250    0.0000 C   0  0  0  0  0  0  0  0  0  0  0  0
   -5.3642    5.4138    0.0000 C   0  0  0  0  0  0  0  0  0  0  0  0
   -5.6196    4.0128    0.0000 O   0  0  0  0  0  0  0  0  0  0  0  0
   -4.5526    5.2659    0.0000 C   0  0  0  0  0  0  0  0  0  0  0  0
   -4.0187    5.8948    0.0000 C   0  0  0  0  0  0  0  0  0  0  0  0
   -4.2964    6.6716    0.0000 C   0  0  0  0  0  0  0  0  0  0  0  0
   -5.1080    6.8196    0.0000 C   0  0  0  0  0  0  0  0  0  0  0  0
   -5.6419    6.1907    0.0000 C   0  0  0  0  0  0  0  0  0  0  0  0
   -4.8795    1.2598    0.0000 C   0  0  0  0  0  0  0  0  0  0  0  0
   -4.4784    1.9808    0.0000 O   0  0  0  0  0  0  0  0  0  0  0  0
   -4.9022    2.6886    0.0000 C   0  0  0  0  0  0  0  0  0  0  0  0
   -4.5010    3.4095    0.0000 C   0  0  0  0  0  0  0  0  0  0  0  0
   -4.9248    4.1174    0.0000 O   0  0  0  0  0  0  0  0  0  0  0  0
   -4.5237    4.8383    0.0000 C   0  0  0  0  0  0  0  0  0  0  0  0
   -3.6988    4.8514    0.0000 C   0  0  0  0  0  0  0  0  0  0  0  0
   -3.2977    5.5723    0.0000 C   0  0  0  0  0  0  0  0  0  0  0  0
   -2.4728    5.5854    0.0000 C   0  0  0  0  0  0  0  0  0  0  0  0
   -2.0490    4.8775    0.0000 C   0  0  0  0  0  0  0  0  0  0  0  0
   -2.4501    4.1566    0.0000 C   0  0  0  0  0  0  0  0  0  0  0  0
   -3.2750    4.1435    0.0000 C   0  0  0  0  0  0  0  0  0  0  0  0
   -5.7271    2.6755    0.0000 C   0  0  0  0  0  0  0  0  0  0  0  0
   -6.1508    3.3834    0.0000 O   0  0  0  0  0  0  0  0  0  0  0  0
   -6.1282    1.9546    0.0000 C   0  0  0  0  0  0  0  0  0  0  0  0
   -6.9531    1.9415    0.0000 O   0  0  0  0  0  0  0  0  0  0  0  0
   -7.7317    1.6688    0.0000 C   0  0  0  0  0  0  0  0  0  0  0  0
   -7.8849    0.8582    0.0000 C   0  0  0  0  0  0  0  0  0  0  0  0
   -7.2594    0.3202    0.0000 C   0  0  0  0  0  0  0  0  0  0  0  0
   -7.4125   -0.4905    0.0000 C   0  0  0  0  0  0  0  0  0  0  0  0
   -8.1912   -0.7632    0.0000 C   0  0  0  0  0  0  0  0  0  0  0  0
   -8.8166   -0.2252    0.0000 C   0  0  0  0  0  0  0  0  0  0  0  0
   -8.6635    0.5855    0.0000 C   0  0  0  0  0  0  0  0  0  0  0  0
   -5.7044    1.2467    0.0000 C   0  0  0  0  0  0  0  0  0  0  0  0
   -6.1055    0.5258    0.0000 N   0  0  0  0  0  0  0  0  0  0  0  0
   -5.8346   -0.2534    0.0000 N   0  3  0  0  0  0  0  0  0  0  0  0
   -5.5636   -1.0326    0.0000 N   0  5  0  0  0  0  0  0  0  0  0  0
   -9.6463    2.5705    0.0000 O   0  0  0  0  0  0  0  0  0  0  0  0
   -8.5607    1.6488    0.0000 O   0  0  0  0  0  0  0  0  0  0  0  0
   -9.0928    1.0220    0.0000 C   0  0  0  0  0  0  0  0  0  0  0  0
   -4.4557    0.5520    0.0000 O   0  0  0  0  0  0  0  0  0  0  0  0
   -3.6468    0.4045    0.0000 C   0  0  0  0  0  0  0  0  0  0  0  0
   -3.3692   -0.3723    0.0000 C   0  0  0  0  0  0  0  0  0  0  0  0
   -2.5575   -0.5203    0.0000 O   0  0  0  0  0  0  0  0  0  0  0  0
   -2.0236    0.1086    0.0000 C   0  0  0  0  0  0  0  0  0  0  0  0
   -2.3013    0.8855    0.0000 C   0  0  0  0  0  0  0  0  0  0  0  0
   -3.1129    1.0335    0.0000 C   0  0  0  0  0  0  0  0  0  0  0  0
   -3.9013   -0.9991    0.0000 C   0  0  0  0  0  0  0  0  0  0  0  0
   -1.7691    1.5123    0.0000 O   0  0  0  0  0  0  0  0  0  0  0  0
   -3.3896    1.8077    0.0000 O   0  0  0  0  0  0  0  0  0  0  0  0
   -3.2638    2.6202    0.0000 C   0  0  0  0  0  0  0  0  0  0  0  0
   -0.9602    1.3648    0.0000 C   0  0  0  0  0  0  0  0  0  0  0  0
   -2.4972    2.9176    0.0000 C   0  0  0  0  0  0  0  0  0  0  0  0
   -1.8470    2.4098    0.0000 C   0  0  0  0  0  0  0  0  0  0  0  0
   -1.0708    2.6872    0.0000 C   0  0  0  0  0  0  0  0  0  0  0  0
   -0.9448    3.4725    0.0000 C   0  0  0  0  0  0  0  0  0  0  0  0
   -1.5950    3.9802    0.0000 C   0  0  0  0  0  0  0  0  0  0  0  0
   -2.3713    3.7028    0.0000 C   0  0  0  0  0  0  0  0  0  0  0  0
   -0.4281    1.9916    0.0000 C   0  0  0  0  0  0  0  0  0  0  0  0
   -0.6835    0.5906    0.0000 O   0  0  0  0  0  0  0  0  0  0  0  0
    0.3835    1.8437    0.0000 C   0  0  0  0  0  0  0  0  0  0  0  0
    0.9175    2.4726    0.0000 C   0  0  0  0  0  0  0  0  0  0  0  0
    0.6398    3.2495    0.0000 C   0  0  0  0  0  0  0  0  0  0  0  0
   -0.1718    3.3974    0.0000 C   0  0  0  0  0  0  0  0  0  0  0  0
   -0.7058    2.7685    0.0000 C   0  0  0  0  0  0  0  0  0  0  0  0
    0.0566   -2.1623    0.0000 C   0  0  0  0  0  0  0  0  0  0  0  0
    0.4578   -1.4414    0.0000 O   0  0  0  0  0  0  0  0  0  0  0  0
    0.0340   -0.7336    0.0000 C   0  0  0  0  0  0  0  0  0  0  0  0
    0.4351   -0.0127    0.0000 C   0  0  0  0  0  0  0  0  0  0  0  0
    0.0113    0.6952    0.0000 O   0  0  0  0  0  0  0  0  0  0  0  0
    0.4124    1.4161    0.0000 C   0  0  0  0  0  0  0  0  0  0  0  0
    1.2373    1.4292    0.0000 C   0  0  0  0  0  0  0  0  0  0  0  0
    1.6385    2.1501    0.0000 C   0  0  0  0  0  0  0  0  0  0  0  0
    2.4634    2.1632    0.0000 C   0  0  0  0  0  0  0  0  0  0  0  0
    2.8871    1.4554    0.0000 C   0  0  0  0  0  0  0  0  0  0  0  0
    2.4860    0.7344    0.0000 C   0  0  0  0  0  0  0  0  0  0  0  0
    1.6611    0.7214    0.0000 C   0  0  0  0  0  0  0  0  0  0  0  0
   -0.7909   -0.7467    0.0000 C   0  0  0  0  0  0  0  0  0  0  0  0
   -1.2147   -0.0388    0.0000 O   0  0  0  0  0  0  0  0  0  0  0  0
   -1.1920   -1.4676    0.0000 C   0  0  0  0  0  0  0  0  0  0  0  0
   -2.0169   -1.4807    0.0000 O   0  0  0  0  0  0  0  0  0  0  0  0
   -2.7956   -1.7534    0.0000 C   0  0  0  0  0  0  0  0  0  0  0  0
   -2.9487   -2.5640    0.0000 C   0  0  0  0  0  0  0  0  0  0  0  0
   -2.3232   -3.1020    0.0000 C   0  0  0  0  0  0  0  0  0  0  0  0
   -2.4764   -3.9126    0.0000 C   0  0  0  0  0  0  0  0  0  0  0  0
   -3.2550   -4.1853    0.0000 C   0  0  0  0  0  0  0  0  0  0  0  0
   -3.8805   -3.6474    0.0000 C   0  0  0  0  0  0  0  0  0  0  0  0
   -3.7273   -2.8367    0.0000 C   0  0  0  0  0  0  0  0  0  0  0  0
   -0.7683   -2.1754    0.0000 C   0  0  0  0  0  0  0  0  0  0  0  0
   -1.1694   -2.8963    0.0000 N   0  0  0  0  0  0  0  0  0  0  0  0
   -1.0204   -3.7078    0.0000 N   0  3  0  0  0  0  0  0  0  0  0  0
   -0.8713   -4.5192    0.0000 N   0  5  0  0  0  0  0  0  0  0  0  0
   -4.7102   -0.8517    0.0000 O   0  0  0  0  0  0  0  0  0  0  0  0
   -3.6245   -1.7734    0.0000 O   0  0  0  0  0  0  0  0  0  0  0  0
   -4.1567   -2.4002    0.0000 C   0  0  0  0  0  0  0  0  0  0  0  0
    0.4804   -2.8702    0.0000 O   0  0  0  0  0  0  0  0  0  0  0  0
    1.2893   -3.0176    0.0000 C   0  0  0  0  0  0  0  0  0  0  0  0
    1.5670   -3.7945    0.0000 C   0  0  0  0  0  0  0  0  0  0  0  0
    2.3786   -3.9424    0.0000 O   0  0  0  0  0  0  0  0  0  0  0  0
    2.9126   -3.3135    0.0000 C   0  0  0  0  0  0  0  0  0  0  0  0
    2.6349   -2.5367    0.0000 C   0  0  0  0  0  0  0  0  0  0  0  0
    1.8233   -2.3887    0.0000 C   0  0  0  0  0  0  0  0  0  0  0  0
    1.0349   -4.4213    0.0000 C   0  0  0  0  0  0  0  0  0  0  0  0
    3.1670   -1.9099    0.0000 O   0  0  0  0  0  0  0  0  0  0  0  0
    1.5465   -1.6145    0.0000 O   0  0  0  0  0  0  0  0  0  0  0  0
    1.6723   -0.8019    0.0000 C   0  0  0  0  0  0  0  0  0  0  0  0
    3.9759   -2.0573    0.0000 C   0  0  0  0  0  0  0  0  0  0  0  0
    2.4389   -0.5046    0.0000 C   0  0  0  0  0  0  0  0  0  0  0  0
    3.0891   -1.0124    0.0000 C   0  0  0  0  0  0  0  0  0  0  0  0
    3.8653   -0.7349    0.0000 C   0  0  0  0  0  0  0  0  0  0  0  0
    3.9913    0.0503    0.0000 C   0  0  0  0  0  0  0  0  0  0  0  0
    3.3411    0.5581    0.0000 C   0  0  0  0  0  0  0  0  0  0  0  0
    2.5649    0.2806    0.0000 C   0  0  0  0  0  0  0  0  0  0  0  0
    4.5081   -1.4305    0.0000 C   0  0  0  0  0  0  0  0  0  0  0  0
    4.2527   -2.8316    0.0000 O   0  0  0  0  0  0  0  0  0  0  0  0
    5.3197   -1.5785    0.0000 C   0  0  0  0  0  0  0  0  0  0  0  0
    5.8536   -0.9496    0.0000 C   0  0  0  0  0  0  0  0  0  0  0  0
    5.5760   -0.1727    0.0000 C   0  0  0  0  0  0  0  0  0  0  0  0
    4.7643   -0.0247    0.0000 C   0  0  0  0  0  0  0  0  0  0  0  0
    4.2304   -0.6537    0.0000 C   0  0  0  0  0  0  0  0  0  0  0  0
    4.9928   -5.5845    0.0000 C   0  0  0  0  0  0  0  0  0  0  0  0
    5.3939   -4.8636    0.0000 O   0  0  0  0  0  0  0  0  0  0  0  0
    4.9701   -4.1557    0.0000 C   0  0  0  0  0  0  0  0  0  0  0  0
    5.3713   -3.4348    0.0000 C   0  0  0  0  0  0  0  0  0  0  0  0
    4.9475   -2.7270    0.0000 O   0  0  0  0  0  0  0  0  0  0  0  0
    5.3486   -2.0061    0.0000 C   0  0  0  0  0  0  0  0  0  0  0  0
    6.1735   -1.9930    0.0000 C   0  0  0  0  0  0  0  0  0  0  0  0
    6.5746   -1.2721    0.0000 C   0  0  0  0  0  0  0  0  0  0  0  0
    7.3995   -1.2590    0.0000 C   0  0  0  0  0  0  0  0  0  0  0  0
    7.8233   -1.9668    0.0000 C   0  0  0  0  0  0  0  0  0  0  0  0
    7.4222   -2.6877    0.0000 C   0  0  0  0  0  0  0  0  0  0  0  0
    6.5973   -2.7008    0.0000 C   0  0  0  0  0  0  0  0  0  0  0  0
    4.1452   -4.1688    0.0000 C   0  0  0  0  0  0  0  0  0  0  0  0
    3.7215   -3.4610    0.0000 O   0  0  0  0  0  0  0  0  0  0  0  0
    3.7441   -4.8897    0.0000 C   0  0  0  0  0  0  0  0  0  0  0  0
    2.9192   -4.9028    0.0000 O   0  0  0  0  0  0  0  0  0  0  0  0
    2.1406   -5.1755    0.0000 C   0  0  0  0  0  0  0  0  0  0  0  0
    1.9874   -5.9862    0.0000 C   0  0  0  0  0  0  0  0  0  0  0  0
    2.6129   -6.5241    0.0000 C   0  0  0  0  0  0  0  0  0  0  0  0
    2.4598   -7.3348    0.0000 C   0  0  0  0  0  0  0  0  0  0  0  0
    1.6811   -7.6075    0.0000 C   0  0  0  0  0  0  0  0  0  0  0  0
    1.0557   -7.0695    0.0000 C   0  0  0  0  0  0  0  0  0  0  0  0
    1.2088   -6.2589    0.0000 C   0  0  0  0  0  0  0  0  0  0  0  0
    4.1679   -5.5976    0.0000 C   0  0  0  0  0  0  0  0  0  0  0  0
    3.7668   -6.3185    0.0000 N   0  0  0  0  0  0  0  0  0  0  0  0
    4.0378   -7.0977    0.0000 N   0  3  0  0  0  0  0  0  0  0  0  0
    4.3087   -7.8770    0.0000 N   0  5  0  0  0  0  0  0  0  0  0  0
    0.2260   -4.2738    0.0000 O   0  0  0  0  0  0  0  0  0  0  0  0
    1.3116   -5.1955    0.0000 O   0  0  0  0  0  0  0  0  0  0  0  0
    0.7795   -5.8223    0.0000 C   0  0  0  0  0  0  0  0  0  0  0  0
    5.4166   -6.2923    0.0000 O   0  0  0  0  0  0  0  0  0  0  0  0
    6.2255   -6.4398    0.0000 C   0  0  0  0  0  0  0  0  0  0  0  0
    6.5032   -7.2167    0.0000 C   0  0  0  0  0  0  0  0  0  0  0  0
    7.3148   -7.3646    0.0000 O   0  0  0  0  0  0  0  0  0  0  0  0
    7.8487   -6.7357    0.0000 C   0  0  0  0  0  0  0  0  0  0  0  0
    7.5710   -5.9588    0.0000 C   0  0  0  0  0  0  0  0  0  0  0  0
    6.7594   -5.8109    0.0000 C   0  0  0  0  0  0  0  0  0  0  0  0
    5.9710   -7.8435    0.0000 C   0  0  0  0  0  0  0  0  0  0  0  0
    8.1032   -5.3320    0.0000 O   0  0  0  0  0  0  0  0  0  0  0  0
    6.4827   -5.0366    0.0000 O   0  0  0  0  0  0  0  0  0  0  0  0
    6.6085   -4.2241    0.0000 C   0  0  0  0  0  0  0  0  0  0  0  0
    8.9121   -5.4795    0.0000 C   0  0  0  0  0  0  0  0  0  0  0  0
    7.3751   -3.9268    0.0000 C   0  0  0  0  0  0  0  0  0  0  0  0
    8.0253   -4.4346    0.0000 C   0  0  0  0  0  0  0  0  0  0  0  0
    8.8015   -4.1571    0.0000 C   0  0  0  0  0  0  0  0  0  0  0  0
    8.9275   -3.3719    0.0000 C   0  0  0  0  0  0  0  0  0  0  0  0
    8.2773   -2.8641    0.0000 C   0  0  0  0  0  0  0  0  0  0  0  0
    7.5011   -3.1415    0.0000 C   0  0  0  0  0  0  0  0  0  0  0  0
    9.4442   -4.8527    0.0000 C   0  0  0  0  0  0  0  0  0  0  0  0
    9.1888   -6.2537    0.0000 O   0  0  0  0  0  0  0  0  0  0  0  0
   10.2558   -5.0006    0.0000 C   0  0  0  0  0  0  0  0  0  0  0  0
   10.7898   -4.3717    0.0000 C   0  0  0  0  0  0  0  0  0  0  0  0
   10.5121   -3.5949    0.0000 C   0  0  0  0  0  0  0  0  0  0  0  0
    9.7005   -3.4469    0.0000 C   0  0  0  0  0  0  0  0  0  0  0  0
    9.1665   -4.0758    0.0000 C   0  0  0  0  0  0  0  0  0  0  0  0
    5.1621   -7.6960    0.0000 O   0  0  0  0  0  0  0  0  0  0  0  0
    6.2478   -8.6177    0.0000 O   0  0  0  0  0  0  0  0  0  0  0  0
    5.7156   -9.2445    0.0000 C   0  0  0  0  0  0  0  0  0  0  0  0
    8.6576   -6.8832    0.0000 O   0  0  0  0  0  0  0  0  0  0  0  0
    8.9801   -7.6670    0.0000 C   0  0  0  0  0  0  0  0  0  0  0  0
    9.8173   -7.7798    0.0000 C   0  0  0  0  0  0  0  0  0  0  0  0
   10.1386   -8.5613    0.0000 C   0  0  0  0  0  0  0  0  0  0  0  0
   10.3340   -7.1109    0.0000 O   0  0  0  0  0  0  0  0  0  0  0  0
   11.6413   -6.5461    0.0000 C   0  0  0  0  0  0  0  0  0  0  0  0
   12.4580   -6.6411    0.0000 C   0  0  0  0  0  0  0  0  0  0  0  0
   12.9487   -5.9813    0.0000 C   0  0  0  0  0  0  0  0  0  0  0  0
   12.6226   -5.2265    0.0000 C   0  0  0  0  0  0  0  0  0  0  0  0
   11.8059   -5.1315    0.0000 C   0  0  0  0  0  0  0  0  0  0  0  0
   11.3152   -5.7913    0.0000 C   0  0  0  0  0  0  0  0  0  0  0  0
   11.1507   -7.2059    0.0000 C   0  0  0  0  0  0  0  0  0  0  0  0
   10.9766   -8.6740    0.0000 O   0  0  0  0  0  0  0  0  0  0  0  0
   12.1194   -9.5238    0.0000 C   0  0  0  0  0  0  0  0  0  0  0  0
   12.4454  -10.2786    0.0000 C   0  0  0  0  0  0  0  0  0  0  0  0
   13.2622  -10.3736    0.0000 C   0  0  0  0  0  0  0  0  0  0  0  0
   13.7528   -9.7138    0.0000 C   0  0  0  0  0  0  0  0  0  0  0  0
   13.4267   -8.9590    0.0000 C   0  0  0  0  0  0  0  0  0  0  0  0
   12.6100   -8.8640    0.0000 C   0  0  0  0  0  0  0  0  0  0  0  0
   11.3026   -9.4288    0.0000 C   0  0  0  0  0  0  0  0  0  0  0  0
  -10.6859    7.5264    0.0000 C   0  0  0  0  0  0  0  0  0  0  0  0
  -11.1097    8.2343    0.0000 C   0  0  0  0  0  0  0  0  0  0  0  0
  -10.7200    8.9615    0.0000 C   0  0  0  0  0  0  0  0  0  0  0  0
  -11.1550    9.6625    0.0000 C   0  0  0  0  0  0  0  0  0  0  0  0
  -11.9796    9.6625    0.0000 C   0  0  0  0  0  0  0  0  0  0  0  0
  -12.3692    8.9615    0.0000 C   0  0  0  0  0  0  0  0  0  0  0  0
  -11.9342    8.2343    0.0000 C   0  0  0  0  0  0  0  0  0  0  0  0
  -12.3979   10.3736    0.0000 O   0  0  0  0  0  0  0  0  0  0  0  0
  -13.2228   10.3669    0.0000 C   0  0  0  0  0  0  0  0  0  0  0  0
  1 28  1  6      
  1  2  1  0      
  2  3  1  0      
  3  4  1  1      
  4  5  1  0      
  5  6  1  0      
  6  7  1  0      
  7  8  2  0      
  8  9  1  0      
  9 10  2  0      
 10 11  1  0      
 11 12  2  0      
  7 12  1  0      
  3 13  1  0      
 13 14  1  6      
 13 15  1  0      
 15 16  1  1      
 16 17  1  0      
 17 18  1  0      
 18 19  2  0      
 19 20  1  0      
 20 21  2  0      
 21 22  1  0      
 22 23  2  0      
 18 23  1  0      
 15 24  1  0      
  1 24  1  0      
 24 25  1  6      
 25 26  2  0      
 26 27  2  0      
 29 28  1  1      
 29 30  1  0      
 30 31  1  0      
 31 32  1  0      
 32 33  1  0      
 33 34  1  0      
 34 29  1  0      
 30 35  1  1      
 33 36  1  1      
 34 37  1  6      
 32 66  1  6      
 37 38  1  0      
 36 39  1  0      
 38 40  1  0      
 40 41  2  0      
 41 42  1  0      
 42 43  2  0      
 43 44  1  0      
 44 45  2  0      
 45 40  1  0      
 39 46  1  0      
 39 47  2  0      
 46 48  2  0      
 48 49  1  0      
 49 50  2  0      
 50 51  1  0      
 51 52  2  0      
 52 46  1  0      
 53 83  1  6      
 53 54  1  0      
 54 55  1  0      
 55 56  1  1      
 56 57  1  0      
 57 58  1  0      
 58 59  1  0      
 59 60  2  0      
 60 61  1  0      
 61 62  2  0      
 62 63  1  0      
 63 64  2  0      
 59 64  1  0      
 55 65  1  0      
 65 66  1  6      
 65 67  1  0      
 67 68  1  1      
 68 69  1  0      
 69 70  1  0      
 70 71  2  0      
 71 72  1  0      
 72 73  2  0      
 73 74  1  0      
 74 75  2  0      
 70 75  1  0      
 67 76  1  0      
 53 76  1  0      
 76 77  1  6      
 77 78  2  0      
 78 79  2  0      
 35 80  2  0      
 35 81  1  0      
 81 82  1  0      
 84 83  1  1      
 84 85  1  0      
 85 86  1  0      
 86 87  1  0      
 87 88  1  0      
 88 89  1  0      
 89 84  1  0      
 85 90  1  1      
 88 91  1  1      
 89 92  1  6      
 87121  1  6      
 92 93  1  0      
 91 94  1  0      
 93 95  1  0      
 95 96  2  0      
 96 97  1  0      
 97 98  2  0      
 98 99  1  0      
 99100  2  0      
100 95  1  0      
 94101  1  0      
 94102  2  0      
101103  2  0      
103104  1  0      
104105  2  0      
105106  1  0      
106107  2  0      
107101  1  0      
108138  1  6      
108109  1  0      
109110  1  0      
110111  1  1      
111112  1  0      
112113  1  0      
113114  1  0      
114115  2  0      
115116  1  0      
116117  2  0      
117118  1  0      
118119  2  0      
114119  1  0      
110120  1  0      
120121  1  6      
120122  1  0      
122123  1  1      
123124  1  0      
124125  1  0      
125126  2  0      
126127  1  0      
127128  2  0      
128129  1  0      
129130  2  0      
125130  1  0      
122131  1  0      
108131  1  0      
131132  1  6      
132133  2  0      
133134  2  0      
 90135  2  0      
 90136  1  0      
136137  1  0      
139138  1  1      
139140  1  0      
140141  1  0      
141142  1  0      
142143  1  0      
143144  1  0      
144139  1  0      
140145  1  1      
143146  1  1      
144147  1  6      
142176  1  6      
147148  1  0      
146149  1  0      
148150  1  0      
150151  2  0      
151152  1  0      
152153  2  0      
153154  1  0      
154155  2  0      
155150  1  0      
149156  1  0      
149157  2  0      
156158  2  0      
158159  1  0      
159160  2  0      
160161  1  0      
161162  2  0      
162156  1  0      
163193  1  6      
163164  1  0      
164165  1  0      
165166  1  1      
166167  1  0      
167168  1  0      
168169  1  0      
169170  2  0      
170171  1  0      
171172  2  0      
172173  1  0      
173174  2  0      
169174  1  0      
165175  1  0      
175176  1  6      
175177  1  0      
177178  1  1      
178179  1  0      
179180  1  0      
180181  2  0      
181182  1  0      
182183  2  0      
183184  1  0      
184185  2  0      
180185  1  0      
177186  1  0      
163186  1  0      
186187  1  6      
187188  2  0      
188189  2  0      
145190  2  0      
145191  1  0      
191192  1  0      
194193  1  1      
194195  1  0      
195196  1  0      
196197  1  0      
197198  1  0      
198199  1  0      
199194  1  0      
195200  1  1      
198201  1  1      
199202  1  6      
197221  1  6      
202203  1  0      
201204  1  0      
203205  1  0      
205206  2  0      
206207  1  0      
207208  2  0      
208209  1  0      
209210  2  0      
210205  1  0      
204211  1  0      
204212  2  0      
211213  2  0      
213214  1  0      
214215  2  0      
215216  1  0      
216217  2  0      
217211  1  0      
200218  2  0      
200219  1  0      
219220  1  0      
221222  1  0      
222223  1  0      
223224  1  0      
224233  1  0      
223225  1  6      
225232  1  0      
226227  2  0      
227228  1  0      
228229  2  0      
229230  1  0      
230231  2  0      
226231  1  0      
226232  1  0      
233240  1  0      
234235  2  0      
235236  1  0      
236237  2  0      
237238  1  0      
238239  2  0      
234239  1  0      
234240  1  0      
 14241  1  0      
241242  1  0      
242243  2  0      
243244  1  0      
244245  2  0      
245246  1  0      
246247  2  0      
247242  1  0      
245248  1  0      
248249  1  0      
M  CHG  8  26   1  27  -1  78   1  79  -1 133   1 134  -1 188   1 189  -1
M  END
