# Supplementary material for: Tetrasaccharide iteration synthesis of a heparin-like dodecasaccharide and radiolabelling for in vivo tissue distribution studies
Source: Springer Nature journal article supplement (doi:10.1038/ncomms3016), 2013-07-05
Supplement: 41467_2013_BFncomms3016_MOESM19_ESM.mol [file 41467_2013_BFncomms3016_MOESM19_ESM.mol]

  ChemDraw06041310152D

240265  0  0  0  0  0  0  0  0999 V2000
   -9.8157    5.3650    0.0000 C   0  0  0  0  0  0  0  0  0  0  0  0
   -9.4145    6.0859    0.0000 O   0  0  0  0  0  0  0  0  0  0  0  0
   -9.8383    6.7938    0.0000 C   0  0  0  0  0  0  0  0  0  0  0  0
   -9.4372    7.5147    0.0000 C   0  0  0  0  0  0  0  0  0  0  0  0
   -9.8610    8.2226    0.0000 O   0  0  0  0  0  0  0  0  0  0  0  0
   -9.4599    8.9435    0.0000 C   0  0  0  0  0  0  0  0  0  0  0  0
   -8.6350    8.9566    0.0000 C   0  0  0  0  0  0  0  0  0  0  0  0
   -8.2338    9.6775    0.0000 C   0  0  0  0  0  0  0  0  0  0  0  0
   -7.4089    9.6906    0.0000 C   0  0  0  0  0  0  0  0  0  0  0  0
   -6.9852    8.9827    0.0000 C   0  0  0  0  0  0  0  0  0  0  0  0
   -7.3863    8.2618    0.0000 C   0  0  0  0  0  0  0  0  0  0  0  0
   -8.2112    8.2487    0.0000 C   0  0  0  0  0  0  0  0  0  0  0  0
  -10.6632    6.7807    0.0000 C   0  0  0  0  0  0  0  0  0  0  0  0
  -11.0870    7.4885    0.0000 O   0  0  0  0  0  0  0  0  0  0  0  0
  -11.0643    6.0598    0.0000 C   0  0  0  0  0  0  0  0  0  0  0  0
  -11.8892    6.0467    0.0000 O   0  0  0  0  0  0  0  0  0  0  0  0
  -12.6679    5.7740    0.0000 C   0  0  0  0  0  0  0  0  0  0  0  0
  -12.8210    4.9633    0.0000 C   0  0  0  0  0  0  0  0  0  0  0  0
  -12.1955    4.4254    0.0000 C   0  0  0  0  0  0  0  0  0  0  0  0
  -12.3487    3.6147    0.0000 C   0  0  0  0  0  0  0  0  0  0  0  0
  -13.1273    3.3420    0.0000 C   0  0  0  0  0  0  0  0  0  0  0  0
  -13.7528    3.8800    0.0000 C   0  0  0  0  0  0  0  0  0  0  0  0
  -13.5996    4.6907    0.0000 C   0  0  0  0  0  0  0  0  0  0  0  0
  -10.6406    5.3519    0.0000 C   0  0  0  0  0  0  0  0  0  0  0  0
  -11.0417    4.6310    0.0000 N   0  0  0  0  0  0  0  0  0  0  0  0
  -10.8927    3.8196    0.0000 N   0  3  0  0  0  0  0  0  0  0  0  0
  -10.7437    3.0082    0.0000 N   0  5  0  0  0  0  0  0  0  0  0  0
   -9.3919    4.6572    0.0000 O   0  0  0  0  0  0  0  0  0  0  0  0
   -8.5830    4.5097    0.0000 C   0  0  0  0  0  0  0  0  0  0  0  0
   -8.3053    3.7329    0.0000 C   0  0  0  0  0  0  0  0  0  0  0  0
   -7.4937    3.5849    0.0000 O   0  0  0  0  0  0  0  0  0  0  0  0
   -6.9597    4.2138    0.0000 C   0  0  0  0  0  0  0  0  0  0  0  0
   -7.2374    4.9907    0.0000 C   0  0  0  0  0  0  0  0  0  0  0  0
   -8.0490    5.1386    0.0000 C   0  0  0  0  0  0  0  0  0  0  0  0
   -8.8374    3.1061    0.0000 C   0  0  0  0  0  0  0  0  0  0  0  0
   -6.7053    5.6175    0.0000 O   0  0  0  0  0  0  0  0  0  0  0  0
   -8.3258    5.9129    0.0000 O   0  0  0  0  0  0  0  0  0  0  0  0
   -8.2000    6.7254    0.0000 C   0  0  0  0  0  0  0  0  0  0  0  0
   -5.8964    5.4700    0.0000 C   0  0  0  0  0  0  0  0  0  0  0  0
   -7.4334    7.0228    0.0000 C   0  0  0  0  0  0  0  0  0  0  0  0
   -6.7832    6.5150    0.0000 C   0  0  0  0  0  0  0  0  0  0  0  0
   -6.0070    6.7924    0.0000 C   0  0  0  0  0  0  0  0  0  0  0  0
   -5.8810    7.5777    0.0000 C   0  0  0  0  0  0  0  0  0  0  0  0
   -6.5312    8.0854    0.0000 C   0  0  0  0  0  0  0  0  0  0  0  0
   -7.3074    7.8080    0.0000 C   0  0  0  0  0  0  0  0  0  0  0  0
   -5.3642    6.0968    0.0000 C   0  0  0  0  0  0  0  0  0  0  0  0
   -5.6196    4.6958    0.0000 O   0  0  0  0  0  0  0  0  0  0  0  0
   -4.5526    5.9489    0.0000 C   0  0  0  0  0  0  0  0  0  0  0  0
   -4.0187    6.5778    0.0000 C   0  0  0  0  0  0  0  0  0  0  0  0
   -4.2964    7.3547    0.0000 C   0  0  0  0  0  0  0  0  0  0  0  0
   -5.1080    7.5026    0.0000 C   0  0  0  0  0  0  0  0  0  0  0  0
   -5.6419    6.8737    0.0000 C   0  0  0  0  0  0  0  0  0  0  0  0
   -4.8795    1.9429    0.0000 C   0  0  0  0  0  0  0  0  0  0  0  0
   -4.4784    2.6638    0.0000 O   0  0  0  0  0  0  0  0  0  0  0  0
   -4.9022    3.3716    0.0000 C   0  0  0  0  0  0  0  0  0  0  0  0
   -4.5010    4.0925    0.0000 C   0  0  0  0  0  0  0  0  0  0  0  0
   -4.9248    4.8004    0.0000 O   0  0  0  0  0  0  0  0  0  0  0  0
   -4.5237    5.5213    0.0000 C   0  0  0  0  0  0  0  0  0  0  0  0
   -3.6988    5.5344    0.0000 C   0  0  0  0  0  0  0  0  0  0  0  0
   -3.2977    6.2553    0.0000 C   0  0  0  0  0  0  0  0  0  0  0  0
   -2.4728    6.2684    0.0000 C   0  0  0  0  0  0  0  0  0  0  0  0
   -2.0490    5.5606    0.0000 C   0  0  0  0  0  0  0  0  0  0  0  0
   -2.4501    4.8396    0.0000 C   0  0  0  0  0  0  0  0  0  0  0  0
   -3.2750    4.8265    0.0000 C   0  0  0  0  0  0  0  0  0  0  0  0
   -5.7271    3.3585    0.0000 C   0  0  0  0  0  0  0  0  0  0  0  0
   -6.1508    4.0664    0.0000 O   0  0  0  0  0  0  0  0  0  0  0  0
   -6.1282    2.6376    0.0000 C   0  0  0  0  0  0  0  0  0  0  0  0
   -6.9531    2.6245    0.0000 O   0  0  0  0  0  0  0  0  0  0  0  0
   -7.7317    2.3518    0.0000 C   0  0  0  0  0  0  0  0  0  0  0  0
   -7.8849    1.5412    0.0000 C   0  0  0  0  0  0  0  0  0  0  0  0
   -7.2594    1.0032    0.0000 C   0  0  0  0  0  0  0  0  0  0  0  0
   -7.4125    0.1926    0.0000 C   0  0  0  0  0  0  0  0  0  0  0  0
   -8.1912   -0.0801    0.0000 C   0  0  0  0  0  0  0  0  0  0  0  0
   -8.8166    0.4578    0.0000 C   0  0  0  0  0  0  0  0  0  0  0  0
   -8.6635    1.2685    0.0000 C   0  0  0  0  0  0  0  0  0  0  0  0
   -5.7044    1.9298    0.0000 C   0  0  0  0  0  0  0  0  0  0  0  0
   -6.1055    1.2089    0.0000 N   0  0  0  0  0  0  0  0  0  0  0  0
   -5.8346    0.4296    0.0000 N   0  3  0  0  0  0  0  0  0  0  0  0
   -5.5636   -0.3496    0.0000 N   0  5  0  0  0  0  0  0  0  0  0  0
   -9.6463    3.2535    0.0000 O   0  0  0  0  0  0  0  0  0  0  0  0
   -8.5607    2.3318    0.0000 O   0  0  0  0  0  0  0  0  0  0  0  0
   -9.0928    1.7050    0.0000 C   0  0  0  0  0  0  0  0  0  0  0  0
   -4.4557    1.2350    0.0000 O   0  0  0  0  0  0  0  0  0  0  0  0
   -3.6468    1.0876    0.0000 C   0  0  0  0  0  0  0  0  0  0  0  0
   -3.3692    0.3107    0.0000 C   0  0  0  0  0  0  0  0  0  0  0  0
   -2.5575    0.1628    0.0000 O   0  0  0  0  0  0  0  0  0  0  0  0
   -2.0236    0.7917    0.0000 C   0  0  0  0  0  0  0  0  0  0  0  0
   -2.3013    1.5685    0.0000 C   0  0  0  0  0  0  0  0  0  0  0  0
   -3.1129    1.7165    0.0000 C   0  0  0  0  0  0  0  0  0  0  0  0
   -3.9013   -0.3161    0.0000 C   0  0  0  0  0  0  0  0  0  0  0  0
   -1.7691    2.1953    0.0000 O   0  0  0  0  0  0  0  0  0  0  0  0
   -3.3896    2.4907    0.0000 O   0  0  0  0  0  0  0  0  0  0  0  0
   -3.2638    3.3033    0.0000 C   0  0  0  0  0  0  0  0  0  0  0  0
   -0.9602    2.0479    0.0000 C   0  0  0  0  0  0  0  0  0  0  0  0
   -2.4972    3.6006    0.0000 C   0  0  0  0  0  0  0  0  0  0  0  0
   -1.8470    3.0928    0.0000 C   0  0  0  0  0  0  0  0  0  0  0  0
   -1.0708    3.3703    0.0000 C   0  0  0  0  0  0  0  0  0  0  0  0
   -0.9448    4.1555    0.0000 C   0  0  0  0  0  0  0  0  0  0  0  0
   -1.5950    4.6633    0.0000 C   0  0  0  0  0  0  0  0  0  0  0  0
   -2.3713    4.3858    0.0000 C   0  0  0  0  0  0  0  0  0  0  0  0
   -0.4281    2.6747    0.0000 C   0  0  0  0  0  0  0  0  0  0  0  0
   -0.6835    1.2736    0.0000 O   0  0  0  0  0  0  0  0  0  0  0  0
    0.3835    2.5267    0.0000 C   0  0  0  0  0  0  0  0  0  0  0  0
    0.9175    3.1556    0.0000 C   0  0  0  0  0  0  0  0  0  0  0  0
    0.6398    3.9325    0.0000 C   0  0  0  0  0  0  0  0  0  0  0  0
   -0.1718    4.0804    0.0000 C   0  0  0  0  0  0  0  0  0  0  0  0
   -0.7058    3.4515    0.0000 C   0  0  0  0  0  0  0  0  0  0  0  0
    0.0566   -1.4793    0.0000 C   0  0  0  0  0  0  0  0  0  0  0  0
    0.4578   -0.7584    0.0000 O   0  0  0  0  0  0  0  0  0  0  0  0
    0.0340   -0.0505    0.0000 C   0  0  0  0  0  0  0  0  0  0  0  0
    0.4351    0.6704    0.0000 C   0  0  0  0  0  0  0  0  0  0  0  0
    0.0113    1.3782    0.0000 O   0  0  0  0  0  0  0  0  0  0  0  0
    0.4124    2.0991    0.0000 C   0  0  0  0  0  0  0  0  0  0  0  0
    1.2373    2.1122    0.0000 C   0  0  0  0  0  0  0  0  0  0  0  0
    1.6385    2.8331    0.0000 C   0  0  0  0  0  0  0  0  0  0  0  0
    2.4634    2.8462    0.0000 C   0  0  0  0  0  0  0  0  0  0  0  0
    2.8871    2.1384    0.0000 C   0  0  0  0  0  0  0  0  0  0  0  0
    2.4860    1.4175    0.0000 C   0  0  0  0  0  0  0  0  0  0  0  0
    1.6611    1.4044    0.0000 C   0  0  0  0  0  0  0  0  0  0  0  0
   -0.7909   -0.0636    0.0000 C   0  0  0  0  0  0  0  0  0  0  0  0
   -1.2147    0.6442    0.0000 O   0  0  0  0  0  0  0  0  0  0  0  0
   -1.1920   -0.7846    0.0000 C   0  0  0  0  0  0  0  0  0  0  0  0
   -2.0169   -0.7976    0.0000 O   0  0  0  0  0  0  0  0  0  0  0  0
   -2.7956   -1.0703    0.0000 C   0  0  0  0  0  0  0  0  0  0  0  0
   -2.9487   -1.8810    0.0000 C   0  0  0  0  0  0  0  0  0  0  0  0
   -2.3232   -2.4190    0.0000 C   0  0  0  0  0  0  0  0  0  0  0  0
   -2.4764   -3.2296    0.0000 C   0  0  0  0  0  0  0  0  0  0  0  0
   -3.2550   -3.5023    0.0000 C   0  0  0  0  0  0  0  0  0  0  0  0
   -3.8805   -2.9643    0.0000 C   0  0  0  0  0  0  0  0  0  0  0  0
   -3.7273   -2.1537    0.0000 C   0  0  0  0  0  0  0  0  0  0  0  0
   -0.7683   -1.4924    0.0000 C   0  0  0  0  0  0  0  0  0  0  0  0
   -1.1694   -2.2133    0.0000 N   0  0  0  0  0  0  0  0  0  0  0  0
   -1.0204   -3.0247    0.0000 N   0  3  0  0  0  0  0  0  0  0  0  0
   -0.8713   -3.8362    0.0000 N   0  5  0  0  0  0  0  0  0  0  0  0
   -4.7102   -0.1686    0.0000 O   0  0  0  0  0  0  0  0  0  0  0  0
   -3.6245   -1.0903    0.0000 O   0  0  0  0  0  0  0  0  0  0  0  0
   -4.1567   -1.7171    0.0000 C   0  0  0  0  0  0  0  0  0  0  0  0
    0.4804   -2.1871    0.0000 O   0  0  0  0  0  0  0  0  0  0  0  0
    1.2893   -2.3346    0.0000 C   0  0  0  0  0  0  0  0  0  0  0  0
    1.5670   -3.1115    0.0000 C   0  0  0  0  0  0  0  0  0  0  0  0
    2.3786   -3.2594    0.0000 O   0  0  0  0  0  0  0  0  0  0  0  0
    2.9126   -2.6305    0.0000 C   0  0  0  0  0  0  0  0  0  0  0  0
    2.6349   -1.8536    0.0000 C   0  0  0  0  0  0  0  0  0  0  0  0
    1.8233   -1.7057    0.0000 C   0  0  0  0  0  0  0  0  0  0  0  0
    1.0349   -3.7383    0.0000 C   0  0  0  0  0  0  0  0  0  0  0  0
    3.1670   -1.2268    0.0000 O   0  0  0  0  0  0  0  0  0  0  0  0
    1.5465   -0.9314    0.0000 O   0  0  0  0  0  0  0  0  0  0  0  0
    1.6723   -0.1189    0.0000 C   0  0  0  0  0  0  0  0  0  0  0  0
    3.9759   -1.3743    0.0000 C   0  0  0  0  0  0  0  0  0  0  0  0
    2.4389    0.1784    0.0000 C   0  0  0  0  0  0  0  0  0  0  0  0
    3.0891   -0.3294    0.0000 C   0  0  0  0  0  0  0  0  0  0  0  0
    3.8653   -0.0519    0.0000 C   0  0  0  0  0  0  0  0  0  0  0  0
    3.9913    0.7333    0.0000 C   0  0  0  0  0  0  0  0  0  0  0  0
    3.3411    1.2411    0.0000 C   0  0  0  0  0  0  0  0  0  0  0  0
    2.5649    0.9636    0.0000 C   0  0  0  0  0  0  0  0  0  0  0  0
    4.5081   -0.7475    0.0000 C   0  0  0  0  0  0  0  0  0  0  0  0
    4.2527   -2.1485    0.0000 O   0  0  0  0  0  0  0  0  0  0  0  0
    5.3197   -0.8954    0.0000 C   0  0  0  0  0  0  0  0  0  0  0  0
    5.8536   -0.2665    0.0000 C   0  0  0  0  0  0  0  0  0  0  0  0
    5.5760    0.5103    0.0000 C   0  0  0  0  0  0  0  0  0  0  0  0
    4.7643    0.6583    0.0000 C   0  0  0  0  0  0  0  0  0  0  0  0
    4.2304    0.0294    0.0000 C   0  0  0  0  0  0  0  0  0  0  0  0
    4.9928   -4.9015    0.0000 C   0  0  0  0  0  0  0  0  0  0  0  0
    5.3939   -4.1806    0.0000 O   0  0  0  0  0  0  0  0  0  0  0  0
    4.9701   -3.4727    0.0000 C   0  0  0  0  0  0  0  0  0  0  0  0
    5.3713   -2.7518    0.0000 C   0  0  0  0  0  0  0  0  0  0  0  0
    4.9475   -2.0440    0.0000 O   0  0  0  0  0  0  0  0  0  0  0  0
    5.3486   -1.3230    0.0000 C   0  0  0  0  0  0  0  0  0  0  0  0
    6.1735   -1.3099    0.0000 C   0  0  0  0  0  0  0  0  0  0  0  0
    6.5746   -0.5890    0.0000 C   0  0  0  0  0  0  0  0  0  0  0  0
    7.3995   -0.5759    0.0000 C   0  0  0  0  0  0  0  0  0  0  0  0
    7.8233   -1.2838    0.0000 C   0  0  0  0  0  0  0  0  0  0  0  0
    7.4222   -2.0047    0.0000 C   0  0  0  0  0  0  0  0  0  0  0  0
    6.5973   -2.0178    0.0000 C   0  0  0  0  0  0  0  0  0  0  0  0
    4.1452   -3.4858    0.0000 C   0  0  0  0  0  0  0  0  0  0  0  0
    3.7215   -2.7780    0.0000 O   0  0  0  0  0  0  0  0  0  0  0  0
    3.7441   -4.2067    0.0000 C   0  0  0  0  0  0  0  0  0  0  0  0
    2.9192   -4.2198    0.0000 O   0  0  0  0  0  0  0  0  0  0  0  0
    2.1406   -4.4925    0.0000 C   0  0  0  0  0  0  0  0  0  0  0  0
    1.9874   -5.3032    0.0000 C   0  0  0  0  0  0  0  0  0  0  0  0
    2.6129   -5.8411    0.0000 C   0  0  0  0  0  0  0  0  0  0  0  0
    2.4598   -6.6518    0.0000 C   0  0  0  0  0  0  0  0  0  0  0  0
    1.6811   -6.9245    0.0000 C   0  0  0  0  0  0  0  0  0  0  0  0
    1.0557   -6.3865    0.0000 C   0  0  0  0  0  0  0  0  0  0  0  0
    1.2088   -5.5759    0.0000 C   0  0  0  0  0  0  0  0  0  0  0  0
    4.1679   -4.9146    0.0000 C   0  0  0  0  0  0  0  0  0  0  0  0
    3.7668   -5.6355    0.0000 N   0  0  0  0  0  0  0  0  0  0  0  0
    4.0378   -6.4147    0.0000 N   0  3  0  0  0  0  0  0  0  0  0  0
    4.3087   -7.1939    0.0000 N   0  5  0  0  0  0  0  0  0  0  0  0
    0.2260   -3.5908    0.0000 O   0  0  0  0  0  0  0  0  0  0  0  0
    1.3116   -4.5125    0.0000 O   0  0  0  0  0  0  0  0  0  0  0  0
    0.7795   -5.1393    0.0000 C   0  0  0  0  0  0  0  0  0  0  0  0
    5.4166   -5.6093    0.0000 O   0  0  0  0  0  0  0  0  0  0  0  0
    6.2255   -5.7568    0.0000 C   0  0  0  0  0  0  0  0  0  0  0  0
    6.5032   -6.5336    0.0000 C   0  0  0  0  0  0  0  0  0  0  0  0
    7.3148   -6.6816    0.0000 O   0  0  0  0  0  0  0  0  0  0  0  0
    7.8487   -6.0527    0.0000 C   0  0  0  0  0  0  0  0  0  0  0  0
    7.5710   -5.2758    0.0000 C   0  0  0  0  0  0  0  0  0  0  0  0
    6.7594   -5.1279    0.0000 C   0  0  0  0  0  0  0  0  0  0  0  0
    5.9710   -7.1604    0.0000 C   0  0  0  0  0  0  0  0  0  0  0  0
    8.1032   -4.6490    0.0000 O   0  0  0  0  0  0  0  0  0  0  0  0
    6.4827   -4.3536    0.0000 O   0  0  0  0  0  0  0  0  0  0  0  0
    6.6085   -3.5411    0.0000 C   0  0  0  0  0  0  0  0  0  0  0  0
    8.9121   -4.7965    0.0000 C   0  0  0  0  0  0  0  0  0  0  0  0
    7.3751   -3.2437    0.0000 C   0  0  0  0  0  0  0  0  0  0  0  0
    8.0253   -3.7515    0.0000 C   0  0  0  0  0  0  0  0  0  0  0  0
    8.8015   -3.4741    0.0000 C   0  0  0  0  0  0  0  0  0  0  0  0
    8.9275   -2.6888    0.0000 C   0  0  0  0  0  0  0  0  0  0  0  0
    8.2773   -2.1811    0.0000 C   0  0  0  0  0  0  0  0  0  0  0  0
    7.5011   -2.4585    0.0000 C   0  0  0  0  0  0  0  0  0  0  0  0
    9.4442   -4.1697    0.0000 C   0  0  0  0  0  0  0  0  0  0  0  0
    9.1888   -5.5707    0.0000 O   0  0  0  0  0  0  0  0  0  0  0  0
   10.2558   -4.3176    0.0000 C   0  0  0  0  0  0  0  0  0  0  0  0
   10.7898   -3.6887    0.0000 C   0  0  0  0  0  0  0  0  0  0  0  0
   10.5121   -2.9118    0.0000 C   0  0  0  0  0  0  0  0  0  0  0  0
    9.7005   -2.7639    0.0000 C   0  0  0  0  0  0  0  0  0  0  0  0
    9.1665   -3.3928    0.0000 C   0  0  0  0  0  0  0  0  0  0  0  0
    5.1621   -7.0130    0.0000 O   0  0  0  0  0  0  0  0  0  0  0  0
    6.2478   -7.9347    0.0000 O   0  0  0  0  0  0  0  0  0  0  0  0
    5.7156   -8.5615    0.0000 C   0  0  0  0  0  0  0  0  0  0  0  0
    8.6576   -6.2001    0.0000 O   0  0  0  0  0  0  0  0  0  0  0  0
    8.9801   -6.9840    0.0000 C   0  0  0  0  0  0  0  0  0  0  0  0
    9.8173   -7.0967    0.0000 C   0  0  0  0  0  0  0  0  0  0  0  0
   10.1386   -7.8783    0.0000 C   0  0  0  0  0  0  0  0  0  0  0  0
   10.3340   -6.4278    0.0000 O   0  0  0  0  0  0  0  0  0  0  0  0
   11.6413   -5.8630    0.0000 C   0  0  0  0  0  0  0  0  0  0  0  0
   12.4580   -5.9580    0.0000 C   0  0  0  0  0  0  0  0  0  0  0  0
   12.9487   -5.2982    0.0000 C   0  0  0  0  0  0  0  0  0  0  0  0
   12.6226   -4.5434    0.0000 C   0  0  0  0  0  0  0  0  0  0  0  0
   11.8059   -4.4484    0.0000 C   0  0  0  0  0  0  0  0  0  0  0  0
   11.3152   -5.1082    0.0000 C   0  0  0  0  0  0  0  0  0  0  0  0
   11.1507   -6.5228    0.0000 C   0  0  0  0  0  0  0  0  0  0  0  0
   10.9766   -7.9909    0.0000 O   0  0  0  0  0  0  0  0  0  0  0  0
   12.1194   -8.8408    0.0000 C   0  0  0  0  0  0  0  0  0  0  0  0
   12.4454   -9.5956    0.0000 C   0  0  0  0  0  0  0  0  0  0  0  0
   13.2622   -9.6906    0.0000 C   0  0  0  0  0  0  0  0  0  0  0  0
   13.7528   -9.0308    0.0000 C   0  0  0  0  0  0  0  0  0  0  0  0
   13.4267   -8.2760    0.0000 C   0  0  0  0  0  0  0  0  0  0  0  0
   12.6100   -8.1810    0.0000 C   0  0  0  0  0  0  0  0  0  0  0  0
   11.3026   -8.7457    0.0000 C   0  0  0  0  0  0  0  0  0  0  0  0
  1 28  1  6      
  1  2  1  0      
  2  3  1  0      
  3  4  1  1      
  4  5  1  0      
  5  6  1  0      
  6  7  1  0      
  7  8  2  0      
  8  9  1  0      
  9 10  2  0      
 10 11  1  0      
 11 12  2  0      
  7 12  1  0      
  3 13  1  0      
 13 14  1  6      
 13 15  1  0      
 15 16  1  1      
 16 17  1  0      
 17 18  1  0      
 18 19  2  0      
 19 20  1  0      
 20 21  2  0      
 21 22  1  0      
 22 23  2  0      
 18 23  1  0      
 15 24  1  0      
  1 24  1  0      
 24 25  1  6      
 25 26  2  0      
 26 27  2  0      
 29 28  1  1      
 29 30  1  0      
 30 31  1  0      
 31 32  1  0      
 32 33  1  0      
 33 34  1  0      
 34 29  1  0      
 30 35  1  1      
 33 36  1  1      
 34 37  1  6      
 32 66  1  6      
 37 38  1  0      
 36 39  1  0      
 38 40  1  0      
 40 41  2  0      
 41 42  1  0      
 42 43  2  0      
 43 44  1  0      
 44 45  2  0      
 45 40  1  0      
 39 46  1  0      
 39 47  2  0      
 46 48  2  0      
 48 49  1  0      
 49 50  2  0      
 50 51  1  0      
 51 52  2  0      
 52 46  1  0      
 53 83  1  6      
 53 54  1  0      
 54 55  1  0      
 55 56  1  1      
 56 57  1  0      
 57 58  1  0      
 58 59  1  0      
 59 60  2  0      
 60 61  1  0      
 61 62  2  0      
 62 63  1  0      
 63 64  2  0      
 59 64  1  0      
 55 65  1  0      
 65 66  1  6      
 65 67  1  0      
 67 68  1  1      
 68 69  1  0      
 69 70  1  0      
 70 71  2  0      
 71 72  1  0      
 72 73  2  0      
 73 74  1  0      
 74 75  2  0      
 70 75  1  0      
 67 76  1  0      
 53 76  1  0      
 76 77  1  6      
 77 78  2  0      
 78 79  2  0      
 35 80  2  0      
 35 81  1  0      
 81 82  1  0      
 84 83  1  1      
 84 85  1  0      
 85 86  1  0      
 86 87  1  0      
 87 88  1  0      
 88 89  1  0      
 89 84  1  0      
 85 90  1  1      
 88 91  1  1      
 89 92  1  6      
 87121  1  6      
 92 93  1  0      
 91 94  1  0      
 93 95  1  0      
 95 96  2  0      
 96 97  1  0      
 97 98  2  0      
 98 99  1  0      
 99100  2  0      
100 95  1  0      
 94101  1  0      
 94102  2  0      
101103  2  0      
103104  1  0      
104105  2  0      
105106  1  0      
106107  2  0      
107101  1  0      
108138  1  6      
108109  1  0      
109110  1  0      
110111  1  1      
111112  1  0      
112113  1  0      
113114  1  0      
114115  2  0      
115116  1  0      
116117  2  0      
117118  1  0      
118119  2  0      
114119  1  0      
110120  1  0      
120121  1  6      
120122  1  0      
122123  1  1      
123124  1  0      
124125  1  0      
125126  2  0      
126127  1  0      
127128  2  0      
128129  1  0      
129130  2  0      
125130  1  0      
122131  1  0      
108131  1  0      
131132  1  6      
132133  2  0      
133134  2  0      
 90135  2  0      
 90136  1  0      
136137  1  0      
139138  1  1      
139140  1  0      
140141  1  0      
141142  1  0      
142143  1  0      
143144  1  0      
144139  1  0      
140145  1  1      
143146  1  1      
144147  1  6      
142176  1  6      
147148  1  0      
146149  1  0      
148150  1  0      
150151  2  0      
151152  1  0      
152153  2  0      
153154  1  0      
154155  2  0      
155150  1  0      
149156  1  0      
149157  2  0      
156158  2  0      
158159  1  0      
159160  2  0      
160161  1  0      
161162  2  0      
162156  1  0      
163193  1  6      
163164  1  0      
164165  1  0      
165166  1  1      
166167  1  0      
167168  1  0      
168169  1  0      
169170  2  0      
170171  1  0      
171172  2  0      
172173  1  0      
173174  2  0      
169174  1  0      
165175  1  0      
175176  1  6      
175177  1  0      
177178  1  1      
178179  1  0      
179180  1  0      
180181  2  0      
181182  1  0      
182183  2  0      
183184  1  0      
184185  2  0      
180185  1  0      
177186  1  0      
163186  1  0      
186187  1  6      
187188  2  0      
188189  2  0      
145190  2  0      
145191  1  0      
191192  1  0      
194193  1  1      
194195  1  0      
195196  1  0      
196197  1  0      
197198  1  0      
198199  1  0      
199194  1  0      
195200  1  1      
198201  1  1      
199202  1  6      
197221  1  6      
202203  1  0      
201204  1  0      
203205  1  0      
205206  2  0      
206207  1  0      
207208  2  0      
208209  1  0      
209210  2  0      
210205  1  0      
204211  1  0      
204212  2  0      
211213  2  0      
213214  1  0      
214215  2  0      
215216  1  0      
216217  2  0      
217211  1  0      
200218  2  0      
200219  1  0      
219220  1  0      
221222  1  0      
222223  1  0      
223224  1  0      
224233  1  0      
223225  1  6      
225232  1  0      
226227  2  0      
227228  1  0      
228229  2  0      
229230  1  0      
230231  2  0      
226231  1  0      
226232  1  0      
233240  1  0      
234235  2  0      
235236  1  0      
236237  2  0      
237238  1  0      
238239  2  0      
234239  1  0      
234240  1  0      
M  CHG  8  26   1  27  -1  78   1  79  -1 133   1 134  -1 188   1 189  -1
M  END
