# Supplementary material for: Tetrasaccharide iteration synthesis of a heparin-like dodecasaccharide and radiolabelling for in vivo tissue distribution studies
Source: Springer Nature journal article supplement (doi:10.1038/ncomms3016), 2013-07-05
Supplement: 41467_2013_BFncomms3016_MOESM21_ESM.mol [file 41467_2013_BFncomms3016_MOESM21_ESM.mol]

  ChemDraw06041310152D

356393  0  0  0  0  0  0  0  0999 V2000
  -13.9348    7.3221    0.0000 O   0  0  0  0  0  0  0  0  0  0  0  0
  -14.2125    8.0989    0.0000 C   0  0  0  0  0  0  0  0  0  0  0  0
  -13.6785    8.7279    0.0000 O   0  0  0  0  0  0  0  0  0  0  0  0
  -13.9562    9.5047    0.0000 C   0  0  0  0  0  0  0  0  0  0  0  0
  -13.4223   10.1336    0.0000 C   0  0  0  0  0  0  0  0  0  0  0  0
  -13.6999   10.9105    0.0000 O   0  0  0  0  0  0  0  0  0  0  0  0
  -13.1660   11.5394    0.0000 C   0  0  0  0  0  0  0  0  0  0  0  0
  -13.4437   12.3163    0.0000 C   0  0  0  0  0  0  0  0  0  0  0  0
  -12.9097   12.9452    0.0000 C   0  0  0  0  0  0  0  0  0  0  0  0
  -13.1874   13.7221    0.0000 C   0  0  0  0  0  0  0  0  0  0  0  0
  -13.9991   13.8700    0.0000 C   0  0  0  0  0  0  0  0  0  0  0  0
  -14.5330   13.2411    0.0000 C   0  0  0  0  0  0  0  0  0  0  0  0
  -14.2553   12.4642    0.0000 C   0  0  0  0  0  0  0  0  0  0  0  0
  -14.7678    9.6527    0.0000 C   0  0  0  0  0  0  0  0  0  0  0  0
  -15.0455   10.4295    0.0000 O   0  0  0  0  0  0  0  0  0  0  0  0
  -15.8571   10.5775    0.0000 C   0  0  0  0  0  0  0  0  0  0  0  0
  -16.1348   11.3543    0.0000 C   0  0  0  0  0  0  0  0  0  0  0  0
  -15.6009   11.9833    0.0000 Cl  0  0  0  0  0  0  0  0  0  0  0  0
  -16.4125   12.1312    0.0000 Cl  0  0  0  0  0  0  0  0  0  0  0  0
  -16.9464   11.5023    0.0000 Cl  0  0  0  0  0  0  0  0  0  0  0  0
  -16.3911    9.9486    0.0000 O   0  0  0  0  0  0  0  0  0  0  0  0
  -15.3018    9.0238    0.0000 C   0  0  0  0  0  0  0  0  0  0  0  0
  -16.1134    9.1717    0.0000 O   0  0  0  0  0  0  0  0  0  0  0  0
  -16.6473    8.5428    0.0000 C   0  0  0  0  0  0  0  0  0  0  0  0
  -17.4590    8.6907    0.0000 C   0  0  0  0  0  0  0  0  0  0  0  0
  -17.7366    9.4676    0.0000 C   0  0  0  0  0  0  0  0  0  0  0  0
  -18.5483    9.6156    0.0000 C   0  0  0  0  0  0  0  0  0  0  0  0
  -19.0822    8.9866    0.0000 C   0  0  0  0  0  0  0  0  0  0  0  0
  -18.8045    8.2098    0.0000 C   0  0  0  0  0  0  0  0  0  0  0  0
  -17.9929    8.0618    0.0000 C   0  0  0  0  0  0  0  0  0  0  0  0
  -15.0241    8.2469    0.0000 C   0  0  0  0  0  0  0  0  0  0  0  0
  -15.5580    7.6180    0.0000 N   0  0  0  0  0  0  0  0  0  0  0  0
  -16.3697    7.7659    0.0000 N   0  3  0  0  0  0  0  0  0  0  0  0
  -17.1813    7.9139    0.0000 N   0  5  0  0  0  0  0  0  0  0  0  0
  -13.1259    7.1746    0.0000 C   0  0  0  0  0  0  0  0  0  0  0  0
  -12.8482    6.3978    0.0000 C   0  0  0  0  0  0  0  0  0  0  0  0
  -12.0366    6.2498    0.0000 O   0  0  0  0  0  0  0  0  0  0  0  0
  -11.5026    6.8787    0.0000 C   0  0  0  0  0  0  0  0  0  0  0  0
  -11.7803    7.6556    0.0000 C   0  0  0  0  0  0  0  0  0  0  0  0
  -12.5919    7.8035    0.0000 C   0  0  0  0  0  0  0  0  0  0  0  0
  -13.3803    5.7710    0.0000 C   0  0  0  0  0  0  0  0  0  0  0  0
  -11.2482    8.2824    0.0000 O   0  0  0  0  0  0  0  0  0  0  0  0
  -12.8687    8.5778    0.0000 O   0  0  0  0  0  0  0  0  0  0  0  0
  -12.7429    9.3903    0.0000 C   0  0  0  0  0  0  0  0  0  0  0  0
  -10.4393    8.1349    0.0000 C   0  0  0  0  0  0  0  0  0  0  0  0
  -11.9763    9.6877    0.0000 C   0  0  0  0  0  0  0  0  0  0  0  0
  -11.3261    9.1799    0.0000 C   0  0  0  0  0  0  0  0  0  0  0  0
  -10.5499    9.4573    0.0000 C   0  0  0  0  0  0  0  0  0  0  0  0
  -10.4239   10.2426    0.0000 C   0  0  0  0  0  0  0  0  0  0  0  0
  -11.0741   10.7503    0.0000 C   0  0  0  0  0  0  0  0  0  0  0  0
  -11.8503   10.4729    0.0000 C   0  0  0  0  0  0  0  0  0  0  0  0
   -9.9071    8.7617    0.0000 C   0  0  0  0  0  0  0  0  0  0  0  0
  -10.1625    7.3607    0.0000 O   0  0  0  0  0  0  0  0  0  0  0  0
   -9.0955    8.6138    0.0000 C   0  0  0  0  0  0  0  0  0  0  0  0
   -8.5616    9.2427    0.0000 C   0  0  0  0  0  0  0  0  0  0  0  0
   -8.8392   10.0196    0.0000 C   0  0  0  0  0  0  0  0  0  0  0  0
   -9.6509   10.1675    0.0000 C   0  0  0  0  0  0  0  0  0  0  0  0
  -10.1848    9.5386    0.0000 C   0  0  0  0  0  0  0  0  0  0  0  0
   -9.4224    4.6078    0.0000 C   0  0  0  0  0  0  0  0  0  0  0  0
   -9.0213    5.3287    0.0000 O   0  0  0  0  0  0  0  0  0  0  0  0
   -9.4451    6.0365    0.0000 C   0  0  0  0  0  0  0  0  0  0  0  0
   -9.0439    6.7574    0.0000 C   0  0  0  0  0  0  0  0  0  0  0  0
   -9.4677    7.4653    0.0000 O   0  0  0  0  0  0  0  0  0  0  0  0
   -9.0666    8.1862    0.0000 C   0  0  0  0  0  0  0  0  0  0  0  0
   -8.2417    8.1993    0.0000 C   0  0  0  0  0  0  0  0  0  0  0  0
   -7.8406    8.9202    0.0000 C   0  0  0  0  0  0  0  0  0  0  0  0
   -7.0157    8.9333    0.0000 C   0  0  0  0  0  0  0  0  0  0  0  0
   -6.5919    8.2254    0.0000 C   0  0  0  0  0  0  0  0  0  0  0  0
   -6.9930    7.5045    0.0000 C   0  0  0  0  0  0  0  0  0  0  0  0
   -7.8179    7.4914    0.0000 C   0  0  0  0  0  0  0  0  0  0  0  0
  -10.2700    6.0234    0.0000 C   0  0  0  0  0  0  0  0  0  0  0  0
  -10.6937    6.7313    0.0000 O   0  0  0  0  0  0  0  0  0  0  0  0
  -10.6711    5.3025    0.0000 C   0  0  0  0  0  0  0  0  0  0  0  0
  -11.4960    5.2894    0.0000 O   0  0  0  0  0  0  0  0  0  0  0  0
  -12.2746    5.0167    0.0000 C   0  0  0  0  0  0  0  0  0  0  0  0
  -12.4278    4.2061    0.0000 C   0  0  0  0  0  0  0  0  0  0  0  0
  -11.8023    3.6681    0.0000 C   0  0  0  0  0  0  0  0  0  0  0  0
  -11.9554    2.8574    0.0000 C   0  0  0  0  0  0  0  0  0  0  0  0
  -12.7341    2.5848    0.0000 C   0  0  0  0  0  0  0  0  0  0  0  0
  -13.3595    3.1227    0.0000 C   0  0  0  0  0  0  0  0  0  0  0  0
  -13.2064    3.9334    0.0000 C   0  0  0  0  0  0  0  0  0  0  0  0
  -10.2473    4.5947    0.0000 C   0  0  0  0  0  0  0  0  0  0  0  0
  -10.6484    3.8737    0.0000 N   0  0  0  0  0  0  0  0  0  0  0  0
  -10.3774    3.0945    0.0000 N   0  3  0  0  0  0  0  0  0  0  0  0
  -10.1065    2.3153    0.0000 N   0  5  0  0  0  0  0  0  0  0  0  0
  -14.1892    5.9184    0.0000 O   0  0  0  0  0  0  0  0  0  0  0  0
  -13.1036    4.9967    0.0000 O   0  0  0  0  0  0  0  0  0  0  0  0
  -13.6357    4.3699    0.0000 C   0  0  0  0  0  0  0  0  0  0  0  0
   -8.9986    3.8999    0.0000 O   0  0  0  0  0  0  0  0  0  0  0  0
   -8.1897    3.7525    0.0000 C   0  0  0  0  0  0  0  0  0  0  0  0
   -7.9120    2.9756    0.0000 C   0  0  0  0  0  0  0  0  0  0  0  0
   -7.1004    2.8276    0.0000 O   0  0  0  0  0  0  0  0  0  0  0  0
   -6.5665    3.4566    0.0000 C   0  0  0  0  0  0  0  0  0  0  0  0
   -6.8442    4.2334    0.0000 C   0  0  0  0  0  0  0  0  0  0  0  0
   -7.6558    4.3814    0.0000 C   0  0  0  0  0  0  0  0  0  0  0  0
   -8.4442    2.3488    0.0000 C   0  0  0  0  0  0  0  0  0  0  0  0
   -6.3120    4.8602    0.0000 O   0  0  0  0  0  0  0  0  0  0  0  0
   -7.9325    5.1556    0.0000 O   0  0  0  0  0  0  0  0  0  0  0  0
   -7.8067    5.9682    0.0000 C   0  0  0  0  0  0  0  0  0  0  0  0
   -5.5031    4.7128    0.0000 C   0  0  0  0  0  0  0  0  0  0  0  0
   -7.0401    6.2655    0.0000 C   0  0  0  0  0  0  0  0  0  0  0  0
   -6.3899    5.7577    0.0000 C   0  0  0  0  0  0  0  0  0  0  0  0
   -5.6137    6.0352    0.0000 C   0  0  0  0  0  0  0  0  0  0  0  0
   -5.4877    6.8204    0.0000 C   0  0  0  0  0  0  0  0  0  0  0  0
   -6.1379    7.3282    0.0000 C   0  0  0  0  0  0  0  0  0  0  0  0
   -6.9141    7.0507    0.0000 C   0  0  0  0  0  0  0  0  0  0  0  0
   -4.9710    5.3396    0.0000 C   0  0  0  0  0  0  0  0  0  0  0  0
   -5.2264    3.9385    0.0000 O   0  0  0  0  0  0  0  0  0  0  0  0
   -4.1593    5.1916    0.0000 C   0  0  0  0  0  0  0  0  0  0  0  0
   -3.6254    5.8205    0.0000 C   0  0  0  0  0  0  0  0  0  0  0  0
   -3.9031    6.5974    0.0000 C   0  0  0  0  0  0  0  0  0  0  0  0
   -4.7147    6.7453    0.0000 C   0  0  0  0  0  0  0  0  0  0  0  0
   -5.2487    6.1164    0.0000 C   0  0  0  0  0  0  0  0  0  0  0  0
   -4.4862    1.1856    0.0000 C   0  0  0  0  0  0  0  0  0  0  0  0
   -4.0851    1.9065    0.0000 O   0  0  0  0  0  0  0  0  0  0  0  0
   -4.5089    2.6143    0.0000 C   0  0  0  0  0  0  0  0  0  0  0  0
   -4.1078    3.3353    0.0000 C   0  0  0  0  0  0  0  0  0  0  0  0
   -4.5316    4.0431    0.0000 O   0  0  0  0  0  0  0  0  0  0  0  0
   -4.1304    4.7640    0.0000 C   0  0  0  0  0  0  0  0  0  0  0  0
   -3.3055    4.7771    0.0000 C   0  0  0  0  0  0  0  0  0  0  0  0
   -2.9044    5.4980    0.0000 C   0  0  0  0  0  0  0  0  0  0  0  0
   -2.0795    5.5111    0.0000 C   0  0  0  0  0  0  0  0  0  0  0  0
   -1.6558    4.8033    0.0000 C   0  0  0  0  0  0  0  0  0  0  0  0
   -2.0569    4.0824    0.0000 C   0  0  0  0  0  0  0  0  0  0  0  0
   -2.8818    4.0693    0.0000 C   0  0  0  0  0  0  0  0  0  0  0  0
   -5.3338    2.6013    0.0000 C   0  0  0  0  0  0  0  0  0  0  0  0
   -5.7576    3.3091    0.0000 O   0  0  0  0  0  0  0  0  0  0  0  0
   -5.7349    1.8803    0.0000 C   0  0  0  0  0  0  0  0  0  0  0  0
   -6.5598    1.8673    0.0000 O   0  0  0  0  0  0  0  0  0  0  0  0
   -7.3384    1.5946    0.0000 C   0  0  0  0  0  0  0  0  0  0  0  0
   -7.4916    0.7839    0.0000 C   0  0  0  0  0  0  0  0  0  0  0  0
   -6.8661    0.2459    0.0000 C   0  0  0  0  0  0  0  0  0  0  0  0
   -7.0193   -0.5647    0.0000 C   0  0  0  0  0  0  0  0  0  0  0  0
   -7.7979   -0.8374    0.0000 C   0  0  0  0  0  0  0  0  0  0  0  0
   -8.4234   -0.2994    0.0000 C   0  0  0  0  0  0  0  0  0  0  0  0
   -8.2702    0.5112    0.0000 C   0  0  0  0  0  0  0  0  0  0  0  0
   -5.3111    1.1725    0.0000 C   0  0  0  0  0  0  0  0  0  0  0  0
   -5.7123    0.4516    0.0000 N   0  0  0  0  0  0  0  0  0  0  0  0
   -5.5632   -0.3599    0.0000 N   0  3  0  0  0  0  0  0  0  0  0  0
   -5.4142   -1.1713    0.0000 N   0  5  0  0  0  0  0  0  0  0  0  0
   -9.2531    2.4963    0.0000 O   0  0  0  0  0  0  0  0  0  0  0  0
   -8.1674    1.5745    0.0000 O   0  0  0  0  0  0  0  0  0  0  0  0
   -8.6996    0.9478    0.0000 C   0  0  0  0  0  0  0  0  0  0  0  0
   -4.0625    0.4777    0.0000 O   0  0  0  0  0  0  0  0  0  0  0  0
   -3.2536    0.3303    0.0000 C   0  0  0  0  0  0  0  0  0  0  0  0
   -2.9759   -0.4466    0.0000 C   0  0  0  0  0  0  0  0  0  0  0  0
   -2.1643   -0.5945    0.0000 O   0  0  0  0  0  0  0  0  0  0  0  0
   -1.6303    0.0344    0.0000 C   0  0  0  0  0  0  0  0  0  0  0  0
   -1.9080    0.8113    0.0000 C   0  0  0  0  0  0  0  0  0  0  0  0
   -2.7196    0.9592    0.0000 C   0  0  0  0  0  0  0  0  0  0  0  0
   -3.5080   -1.0734    0.0000 C   0  0  0  0  0  0  0  0  0  0  0  0
   -1.3759    1.4381    0.0000 O   0  0  0  0  0  0  0  0  0  0  0  0
   -2.9964    1.7335    0.0000 O   0  0  0  0  0  0  0  0  0  0  0  0
   -2.8706    2.5460    0.0000 C   0  0  0  0  0  0  0  0  0  0  0  0
   -0.5670    1.2906    0.0000 C   0  0  0  0  0  0  0  0  0  0  0  0
   -2.1040    2.8433    0.0000 C   0  0  0  0  0  0  0  0  0  0  0  0
   -1.4538    2.3355    0.0000 C   0  0  0  0  0  0  0  0  0  0  0  0
   -0.6775    2.6130    0.0000 C   0  0  0  0  0  0  0  0  0  0  0  0
   -0.5516    3.3982    0.0000 C   0  0  0  0  0  0  0  0  0  0  0  0
   -1.2018    3.9060    0.0000 C   0  0  0  0  0  0  0  0  0  0  0  0
   -1.9780    3.6285    0.0000 C   0  0  0  0  0  0  0  0  0  0  0  0
   -0.0348    1.9174    0.0000 C   0  0  0  0  0  0  0  0  0  0  0  0
   -0.2902    0.5164    0.0000 O   0  0  0  0  0  0  0  0  0  0  0  0
    0.7768    1.7694    0.0000 C   0  0  0  0  0  0  0  0  0  0  0  0
    1.3107    2.3984    0.0000 C   0  0  0  0  0  0  0  0  0  0  0  0
    1.0331    3.1752    0.0000 C   0  0  0  0  0  0  0  0  0  0  0  0
    0.2214    3.3232    0.0000 C   0  0  0  0  0  0  0  0  0  0  0  0
   -0.3125    2.6943    0.0000 C   0  0  0  0  0  0  0  0  0  0  0  0
    0.4499   -2.2366    0.0000 C   0  0  0  0  0  0  0  0  0  0  0  0
    0.8510   -1.5157    0.0000 O   0  0  0  0  0  0  0  0  0  0  0  0
    0.4272   -0.8078    0.0000 C   0  0  0  0  0  0  0  0  0  0  0  0
    0.8284   -0.0869    0.0000 C   0  0  0  0  0  0  0  0  0  0  0  0
    0.4046    0.6209    0.0000 O   0  0  0  0  0  0  0  0  0  0  0  0
    0.8057    1.3419    0.0000 C   0  0  0  0  0  0  0  0  0  0  0  0
    1.6306    1.3549    0.0000 C   0  0  0  0  0  0  0  0  0  0  0  0
    2.0317    2.0759    0.0000 C   0  0  0  0  0  0  0  0  0  0  0  0
    2.8566    2.0890    0.0000 C   0  0  0  0  0  0  0  0  0  0  0  0
    3.2804    1.3811    0.0000 C   0  0  0  0  0  0  0  0  0  0  0  0
    2.8793    0.6602    0.0000 C   0  0  0  0  0  0  0  0  0  0  0  0
    2.0544    0.6471    0.0000 C   0  0  0  0  0  0  0  0  0  0  0  0
   -0.3976   -0.8209    0.0000 C   0  0  0  0  0  0  0  0  0  0  0  0
   -0.8214   -0.1131    0.0000 O   0  0  0  0  0  0  0  0  0  0  0  0
   -0.7988   -1.5418    0.0000 C   0  0  0  0  0  0  0  0  0  0  0  0
   -1.6237   -1.5549    0.0000 O   0  0  0  0  0  0  0  0  0  0  0  0
   -2.4023   -1.8276    0.0000 C   0  0  0  0  0  0  0  0  0  0  0  0
   -2.5554   -2.6383    0.0000 C   0  0  0  0  0  0  0  0  0  0  0  0
   -1.9300   -3.1762    0.0000 C   0  0  0  0  0  0  0  0  0  0  0  0
   -2.0831   -3.9869    0.0000 C   0  0  0  0  0  0  0  0  0  0  0  0
   -2.8618   -4.2596    0.0000 C   0  0  0  0  0  0  0  0  0  0  0  0
   -3.4872   -3.7216    0.0000 C   0  0  0  0  0  0  0  0  0  0  0  0
   -3.3341   -2.9110    0.0000 C   0  0  0  0  0  0  0  0  0  0  0  0
   -0.3750   -2.2497    0.0000 C   0  0  0  0  0  0  0  0  0  0  0  0
   -0.7761   -2.9706    0.0000 N   0  0  0  0  0  0  0  0  0  0  0  0
   -0.5051   -3.7498    0.0000 N   0  3  0  0  0  0  0  0  0  0  0  0
   -0.2342   -4.5290    0.0000 N   0  5  0  0  0  0  0  0  0  0  0  0
   -4.3169   -0.9259    0.0000 O   0  0  0  0  0  0  0  0  0  0  0  0
   -3.2313   -1.8476    0.0000 O   0  0  0  0  0  0  0  0  0  0  0  0
   -3.7634   -2.4744    0.0000 C   0  0  0  0  0  0  0  0  0  0  0  0
    0.8737   -2.9444    0.0000 O   0  0  0  0  0  0  0  0  0  0  0  0
    1.6826   -3.0919    0.0000 C   0  0  0  0  0  0  0  0  0  0  0  0
    1.9603   -3.8687    0.0000 C   0  0  0  0  0  0  0  0  0  0  0  0
    2.7719   -4.0167    0.0000 O   0  0  0  0  0  0  0  0  0  0  0  0
    3.3058   -3.3878    0.0000 C   0  0  0  0  0  0  0  0  0  0  0  0
    3.0281   -2.6109    0.0000 C   0  0  0  0  0  0  0  0  0  0  0  0
    2.2165   -2.4630    0.0000 C   0  0  0  0  0  0  0  0  0  0  0  0
    1.4281   -4.4955    0.0000 C   0  0  0  0  0  0  0  0  0  0  0  0
    3.5603   -1.9841    0.0000 O   0  0  0  0  0  0  0  0  0  0  0  0
    1.9398   -1.6887    0.0000 O   0  0  0  0  0  0  0  0  0  0  0  0
    2.0656   -0.8762    0.0000 C   0  0  0  0  0  0  0  0  0  0  0  0
    4.3692   -2.1316    0.0000 C   0  0  0  0  0  0  0  0  0  0  0  0
    2.8322   -0.5789    0.0000 C   0  0  0  0  0  0  0  0  0  0  0  0
    3.4824   -1.0866    0.0000 C   0  0  0  0  0  0  0  0  0  0  0  0
    4.2586   -0.8092    0.0000 C   0  0  0  0  0  0  0  0  0  0  0  0
    4.3846   -0.0239    0.0000 C   0  0  0  0  0  0  0  0  0  0  0  0
    3.7344    0.4838    0.0000 C   0  0  0  0  0  0  0  0  0  0  0  0
    2.9582    0.2064    0.0000 C   0  0  0  0  0  0  0  0  0  0  0  0
    4.9013   -1.5048    0.0000 C   0  0  0  0  0  0  0  0  0  0  0  0
    4.6459   -2.9058    0.0000 O   0  0  0  0  0  0  0  0  0  0  0  0
    5.7130   -1.6527    0.0000 C   0  0  0  0  0  0  0  0  0  0  0  0
    6.2469   -1.0238    0.0000 C   0  0  0  0  0  0  0  0  0  0  0  0
    5.9692   -0.2469    0.0000 C   0  0  0  0  0  0  0  0  0  0  0  0
    5.1576   -0.0990    0.0000 C   0  0  0  0  0  0  0  0  0  0  0  0
    4.6236   -0.7279    0.0000 C   0  0  0  0  0  0  0  0  0  0  0  0
    5.3861   -5.6587    0.0000 C   0  0  0  0  0  0  0  0  0  0  0  0
    5.7872   -4.9378    0.0000 O   0  0  0  0  0  0  0  0  0  0  0  0
    5.3634   -4.2300    0.0000 C   0  0  0  0  0  0  0  0  0  0  0  0
    5.7645   -3.5091    0.0000 C   0  0  0  0  0  0  0  0  0  0  0  0
    5.3407   -2.8012    0.0000 O   0  0  0  0  0  0  0  0  0  0  0  0
    5.7419   -2.0803    0.0000 C   0  0  0  0  0  0  0  0  0  0  0  0
    6.5668   -2.0672    0.0000 C   0  0  0  0  0  0  0  0  0  0  0  0
    6.9679   -1.3463    0.0000 C   0  0  0  0  0  0  0  0  0  0  0  0
    7.7928   -1.3332    0.0000 C   0  0  0  0  0  0  0  0  0  0  0  0
    8.2166   -2.0411    0.0000 C   0  0  0  0  0  0  0  0  0  0  0  0
    7.8154   -2.7620    0.0000 C   0  0  0  0  0  0  0  0  0  0  0  0
    6.9905   -2.7751    0.0000 C   0  0  0  0  0  0  0  0  0  0  0  0
    4.5385   -4.2431    0.0000 C   0  0  0  0  0  0  0  0  0  0  0  0
    4.1147   -3.5352    0.0000 O   0  0  0  0  0  0  0  0  0  0  0  0
    4.1374   -4.9640    0.0000 C   0  0  0  0  0  0  0  0  0  0  0  0
    3.3125   -4.9771    0.0000 O   0  0  0  0  0  0  0  0  0  0  0  0
    2.5339   -5.2498    0.0000 C   0  0  0  0  0  0  0  0  0  0  0  0
    2.3807   -6.0604    0.0000 C   0  0  0  0  0  0  0  0  0  0  0  0
    3.0062   -6.5984    0.0000 C   0  0  0  0  0  0  0  0  0  0  0  0
    2.8530   -7.4091    0.0000 C   0  0  0  0  0  0  0  0  0  0  0  0
    2.0744   -7.6817    0.0000 C   0  0  0  0  0  0  0  0  0  0  0  0
    1.4489   -7.1438    0.0000 C   0  0  0  0  0  0  0  0  0  0  0  0
    1.6021   -6.3331    0.0000 C   0  0  0  0  0  0  0  0  0  0  0  0
    4.5612   -5.6718    0.0000 C   0  0  0  0  0  0  0  0  0  0  0  0
    4.1600   -6.3928    0.0000 N   0  0  0  0  0  0  0  0  0  0  0  0
    4.3091   -7.2042    0.0000 N   0  3  0  0  0  0  0  0  0  0  0  0
    4.4581   -8.0156    0.0000 N   0  5  0  0  0  0  0  0  0  0  0  0
    0.6192   -4.3481    0.0000 O   0  0  0  0  0  0  0  0  0  0  0  0
    1.7049   -5.2698    0.0000 O   0  0  0  0  0  0  0  0  0  0  0  0
    1.1727   -5.8966    0.0000 C   0  0  0  0  0  0  0  0  0  0  0  0
    5.8098   -6.3666    0.0000 O   0  0  0  0  0  0  0  0  0  0  0  0
    6.6187   -6.5140    0.0000 C   0  0  0  0  0  0  0  0  0  0  0  0
    6.8964   -7.2909    0.0000 C   0  0  0  0  0  0  0  0  0  0  0  0
    7.7080   -7.4389    0.0000 O   0  0  0  0  0  0  0  0  0  0  0  0
    8.2420   -6.8099    0.0000 C   0  0  0  0  0  0  0  0  0  0  0  0
    7.9643   -6.0331    0.0000 C   0  0  0  0  0  0  0  0  0  0  0  0
    7.1527   -5.8851    0.0000 C   0  0  0  0  0  0  0  0  0  0  0  0
    6.3643   -7.9177    0.0000 C   0  0  0  0  0  0  0  0  0  0  0  0
    8.4964   -5.4063    0.0000 O   0  0  0  0  0  0  0  0  0  0  0  0
    6.8759   -5.1109    0.0000 O   0  0  0  0  0  0  0  0  0  0  0  0
    7.0017   -4.2983    0.0000 C   0  0  0  0  0  0  0  0  0  0  0  0
    9.3053   -5.5537    0.0000 C   0  0  0  0  0  0  0  0  0  0  0  0
    7.7683   -4.0010    0.0000 C   0  0  0  0  0  0  0  0  0  0  0  0
    8.4185   -4.5088    0.0000 C   0  0  0  0  0  0  0  0  0  0  0  0
    9.1948   -4.2313    0.0000 C   0  0  0  0  0  0  0  0  0  0  0  0
    9.3208   -3.4461    0.0000 C   0  0  0  0  0  0  0  0  0  0  0  0
    8.6705   -2.9383    0.0000 C   0  0  0  0  0  0  0  0  0  0  0  0
    7.8943   -3.2158    0.0000 C   0  0  0  0  0  0  0  0  0  0  0  0
    9.8375   -4.9269    0.0000 C   0  0  0  0  0  0  0  0  0  0  0  0
    9.5821   -6.3280    0.0000 O   0  0  0  0  0  0  0  0  0  0  0  0
   10.6491   -5.0749    0.0000 C   0  0  0  0  0  0  0  0  0  0  0  0
   11.1831   -4.4460    0.0000 C   0  0  0  0  0  0  0  0  0  0  0  0
   10.9054   -3.6691    0.0000 C   0  0  0  0  0  0  0  0  0  0  0  0
   10.0937   -3.5212    0.0000 C   0  0  0  0  0  0  0  0  0  0  0  0
    9.5598   -4.1501    0.0000 C   0  0  0  0  0  0  0  0  0  0  0  0
   10.3222   -9.0809    0.0000 C   0  0  0  0  0  0  0  0  0  0  0  0
   10.7233   -8.3600    0.0000 O   0  0  0  0  0  0  0  0  0  0  0  0
   10.2996   -7.6522    0.0000 C   0  0  0  0  0  0  0  0  0  0  0  0
   10.7007   -6.9312    0.0000 C   0  0  0  0  0  0  0  0  0  0  0  0
   10.2769   -6.2234    0.0000 O   0  0  0  0  0  0  0  0  0  0  0  0
   10.6780   -5.5025    0.0000 C   0  0  0  0  0  0  0  0  0  0  0  0
   11.5029   -5.4894    0.0000 C   0  0  0  0  0  0  0  0  0  0  0  0
   11.9040   -4.7685    0.0000 C   0  0  0  0  0  0  0  0  0  0  0  0
   12.7289   -4.7554    0.0000 C   0  0  0  0  0  0  0  0  0  0  0  0
   13.1527   -5.4632    0.0000 C   0  0  0  0  0  0  0  0  0  0  0  0
   12.7516   -6.1841    0.0000 C   0  0  0  0  0  0  0  0  0  0  0  0
   11.9267   -6.1972    0.0000 C   0  0  0  0  0  0  0  0  0  0  0  0
    9.4747   -7.6652    0.0000 C   0  0  0  0  0  0  0  0  0  0  0  0
    9.0509   -6.9574    0.0000 O   0  0  0  0  0  0  0  0  0  0  0  0
    9.0735   -8.3862    0.0000 C   0  0  0  0  0  0  0  0  0  0  0  0
    8.2486   -8.3992    0.0000 O   0  0  0  0  0  0  0  0  0  0  0  0
    7.4700   -8.6719    0.0000 C   0  0  0  0  0  0  0  0  0  0  0  0
    7.3169   -9.4826    0.0000 C   0  0  0  0  0  0  0  0  0  0  0  0
    7.9423  -10.0206    0.0000 C   0  0  0  0  0  0  0  0  0  0  0  0
    7.7892  -10.8312    0.0000 C   0  0  0  0  0  0  0  0  0  0  0  0
    7.0106  -11.1039    0.0000 C   0  0  0  0  0  0  0  0  0  0  0  0
    6.3851  -10.5660    0.0000 C   0  0  0  0  0  0  0  0  0  0  0  0
    6.5382   -9.7553    0.0000 C   0  0  0  0  0  0  0  0  0  0  0  0
    9.4973   -9.0940    0.0000 C   0  0  0  0  0  0  0  0  0  0  0  0
    9.0962   -9.8149    0.0000 N   0  0  0  0  0  0  0  0  0  0  0  0
    9.3672  -10.5942    0.0000 N   0  3  0  0  0  0  0  0  0  0  0  0
    9.6381  -11.3734    0.0000 N   0  5  0  0  0  0  0  0  0  0  0  0
    5.5554   -7.7703    0.0000 O   0  0  0  0  0  0  0  0  0  0  0  0
    6.6410   -8.6920    0.0000 O   0  0  0  0  0  0  0  0  0  0  0  0
    6.1089   -9.3188    0.0000 C   0  0  0  0  0  0  0  0  0  0  0  0
   10.7460   -9.7888    0.0000 O   0  0  0  0  0  0  0  0  0  0  0  0
   11.5549   -9.9362    0.0000 C   0  0  0  0  0  0  0  0  0  0  0  0
   11.8326  -10.7131    0.0000 C   0  0  0  0  0  0  0  0  0  0  0  0
   12.6442  -10.8610    0.0000 O   0  0  0  0  0  0  0  0  0  0  0  0
   13.1781  -10.2321    0.0000 C   0  0  0  0  0  0  0  0  0  0  0  0
   12.9005   -9.4552    0.0000 C   0  0  0  0  0  0  0  0  0  0  0  0
   12.0888   -9.3073    0.0000 C   0  0  0  0  0  0  0  0  0  0  0  0
   11.3004  -11.3399    0.0000 C   0  0  0  0  0  0  0  0  0  0  0  0
   13.4326   -8.8285    0.0000 O   0  0  0  0  0  0  0  0  0  0  0  0
   11.8121   -8.5330    0.0000 O   0  0  0  0  0  0  0  0  0  0  0  0
   11.9379   -7.7205    0.0000 C   0  0  0  0  0  0  0  0  0  0  0  0
   14.2415   -8.9759    0.0000 C   0  0  0  0  0  0  0  0  0  0  0  0
   12.7045   -7.4232    0.0000 C   0  0  0  0  0  0  0  0  0  0  0  0
   13.3547   -7.9310    0.0000 C   0  0  0  0  0  0  0  0  0  0  0  0
   14.1309   -7.6535    0.0000 C   0  0  0  0  0  0  0  0  0  0  0  0
   14.2569   -6.8683    0.0000 C   0  0  0  0  0  0  0  0  0  0  0  0
   13.6067   -6.3605    0.0000 C   0  0  0  0  0  0  0  0  0  0  0  0
   12.8305   -6.6380    0.0000 C   0  0  0  0  0  0  0  0  0  0  0  0
   14.7736   -8.3491    0.0000 C   0  0  0  0  0  0  0  0  0  0  0  0
   14.5182   -9.7502    0.0000 O   0  0  0  0  0  0  0  0  0  0  0  0
   15.5853   -8.4971    0.0000 C   0  0  0  0  0  0  0  0  0  0  0  0
   16.1192   -7.8681    0.0000 C   0  0  0  0  0  0  0  0  0  0  0  0
   15.8415   -7.0913    0.0000 C   0  0  0  0  0  0  0  0  0  0  0  0
   15.0299   -6.9433    0.0000 C   0  0  0  0  0  0  0  0  0  0  0  0
   14.4960   -7.5722    0.0000 C   0  0  0  0  0  0  0  0  0  0  0  0
   10.4915  -11.1924    0.0000 O   0  0  0  0  0  0  0  0  0  0  0  0
   11.5772  -12.1141    0.0000 O   0  0  0  0  0  0  0  0  0  0  0  0
   11.0450  -12.7409    0.0000 C   0  0  0  0  0  0  0  0  0  0  0  0
   13.9870  -10.3796    0.0000 O   0  0  0  0  0  0  0  0  0  0  0  0
   14.3095  -11.1634    0.0000 C   0  0  0  0  0  0  0  0  0  0  0  0
   15.1467  -11.2762    0.0000 C   0  0  0  0  0  0  0  0  0  0  0  0
   15.4680  -12.0577    0.0000 C   0  0  0  0  0  0  0  0  0  0  0  0
   15.6634  -10.6073    0.0000 O   0  0  0  0  0  0  0  0  0  0  0  0
   16.9707  -10.0425    0.0000 C   0  0  0  0  0  0  0  0  0  0  0  0
   17.7874  -10.1375    0.0000 C   0  0  0  0  0  0  0  0  0  0  0  0
   18.2781   -9.4777    0.0000 C   0  0  0  0  0  0  0  0  0  0  0  0
   17.9520   -8.7229    0.0000 C   0  0  0  0  0  0  0  0  0  0  0  0
   17.1353   -8.6279    0.0000 C   0  0  0  0  0  0  0  0  0  0  0  0
   16.6447   -9.2877    0.0000 C   0  0  0  0  0  0  0  0  0  0  0  0
   16.4801  -10.7023    0.0000 C   0  0  0  0  0  0  0  0  0  0  0  0
   16.3060  -12.1704    0.0000 O   0  0  0  0  0  0  0  0  0  0  0  0
   17.4488  -13.0202    0.0000 C   0  0  0  0  0  0  0  0  0  0  0  0
   17.7749  -13.7750    0.0000 C   0  0  0  0  0  0  0  0  0  0  0  0
   18.5916  -13.8700    0.0000 C   0  0  0  0  0  0  0  0  0  0  0  0
   19.0822  -13.2102    0.0000 C   0  0  0  0  0  0  0  0  0  0  0  0
   18.7561  -12.4554    0.0000 C   0  0  0  0  0  0  0  0  0  0  0  0
   17.9394  -12.3604    0.0000 C   0  0  0  0  0  0  0  0  0  0  0  0
   16.6321  -12.9252    0.0000 C   0  0  0  0  0  0  0  0  0  0  0  0
  2  1  1  6      
  2  3  1  0      
  3  4  1  0      
  4  5  1  1      
  5  6  1  0      
  6  7  1  0      
  7  8  1  0      
  8  9  2  0      
  9 10  1  0      
 10 11  2  0      
 11 12  1  0      
 12 13  2  0      
  8 13  1  0      
  4 14  1  0      
 14 15  1  6      
 15 16  1  0      
 16 17  1  0      
 17 18  1  0      
 17 19  1  0      
 17 20  1  0      
 16 21  2  0      
 14 22  1  0      
 22 23  1  1      
 23 24  1  0      
 24 25  1  0      
 25 26  2  0      
 26 27  1  0      
 27 28  2  0      
 28 29  1  0      
 29 30  2  0      
 25 30  1  0      
 22 31  1  0      
  2 31  1  0      
 31 32  1  6      
 32 33  2  0      
 33 34  2  0      
 35  1  1  1      
 35 36  1  0      
 36 37  1  0      
 37 38  1  0      
 38 39  1  0      
 39 40  1  0      
 40 35  1  0      
 36 41  1  1      
 39 42  1  1      
 40 43  1  6      
 38 72  1  6      
 43 44  1  0      
 42 45  1  0      
 44 46  1  0      
 46 47  2  0      
 47 48  1  0      
 48 49  2  0      
 49 50  1  0      
 50 51  2  0      
 51 46  1  0      
 45 52  1  0      
 45 53  2  0      
 52 54  2  0      
 54 55  1  0      
 55 56  2  0      
 56 57  1  0      
 57 58  2  0      
 58 52  1  0      
 59 89  1  6      
 59 60  1  0      
 60 61  1  0      
 61 62  1  1      
 62 63  1  0      
 63 64  1  0      
 64 65  1  0      
 65 66  2  0      
 66 67  1  0      
 67 68  2  0      
 68 69  1  0      
 69 70  2  0      
 65 70  1  0      
 61 71  1  0      
 71 72  1  6      
 71 73  1  0      
 73 74  1  1      
 74 75  1  0      
 75 76  1  0      
 76 77  2  0      
 77 78  1  0      
 78 79  2  0      
 79 80  1  0      
 80 81  2  0      
 76 81  1  0      
 73 82  1  0      
 59 82  1  0      
 82 83  1  6      
 83 84  2  0      
 84 85  2  0      
 41 86  2  0      
 41 87  1  0      
 87 88  1  0      
 90 89  1  1      
 90 91  1  0      
 91 92  1  0      
 92 93  1  0      
 93 94  1  0      
 94 95  1  0      
 95 90  1  0      
 91 96  1  1      
 94 97  1  1      
 95 98  1  6      
 93127  1  6      
 98 99  1  0      
 97100  1  0      
 99101  1  0      
101102  2  0      
102103  1  0      
103104  2  0      
104105  1  0      
105106  2  0      
106101  1  0      
100107  1  0      
100108  2  0      
107109  2  0      
109110  1  0      
110111  2  0      
111112  1  0      
112113  2  0      
113107  1  0      
114144  1  6      
114115  1  0      
115116  1  0      
116117  1  1      
117118  1  0      
118119  1  0      
119120  1  0      
120121  2  0      
121122  1  0      
122123  2  0      
123124  1  0      
124125  2  0      
120125  1  0      
116126  1  0      
126127  1  6      
126128  1  0      
128129  1  1      
129130  1  0      
130131  1  0      
131132  2  0      
132133  1  0      
133134  2  0      
134135  1  0      
135136  2  0      
131136  1  0      
128137  1  0      
114137  1  0      
137138  1  6      
138139  2  0      
139140  2  0      
 96141  2  0      
 96142  1  0      
142143  1  0      
145144  1  1      
145146  1  0      
146147  1  0      
147148  1  0      
148149  1  0      
149150  1  0      
150145  1  0      
146151  1  1      
149152  1  1      
150153  1  6      
148182  1  6      
153154  1  0      
152155  1  0      
154156  1  0      
156157  2  0      
157158  1  0      
158159  2  0      
159160  1  0      
160161  2  0      
161156  1  0      
155162  1  0      
155163  2  0      
162164  2  0      
164165  1  0      
165166  2  0      
166167  1  0      
167168  2  0      
168162  1  0      
169199  1  6      
169170  1  0      
170171  1  0      
171172  1  1      
172173  1  0      
173174  1  0      
174175  1  0      
175176  2  0      
176177  1  0      
177178  2  0      
178179  1  0      
179180  2  0      
175180  1  0      
171181  1  0      
181182  1  6      
181183  1  0      
183184  1  1      
184185  1  0      
185186  1  0      
186187  2  0      
187188  1  0      
188189  2  0      
189190  1  0      
190191  2  0      
186191  1  0      
183192  1  0      
169192  1  0      
192193  1  6      
193194  2  0      
194195  2  0      
151196  2  0      
151197  1  0      
197198  1  0      
200199  1  1      
200201  1  0      
201202  1  0      
202203  1  0      
203204  1  0      
204205  1  0      
205200  1  0      
201206  1  1      
204207  1  1      
205208  1  6      
203237  1  6      
208209  1  0      
207210  1  0      
209211  1  0      
211212  2  0      
212213  1  0      
213214  2  0      
214215  1  0      
215216  2  0      
216211  1  0      
210217  1  0      
210218  2  0      
217219  2  0      
219220  1  0      
220221  2  0      
221222  1  0      
222223  2  0      
223217  1  0      
224254  1  6      
224225  1  0      
225226  1  0      
226227  1  1      
227228  1  0      
228229  1  0      
229230  1  0      
230231  2  0      
231232  1  0      
232233  2  0      
233234  1  0      
234235  2  0      
230235  1  0      
226236  1  0      
236237  1  6      
236238  1  0      
238239  1  1      
239240  1  0      
240241  1  0      
241242  2  0      
242243  1  0      
243244  2  0      
244245  1  0      
245246  2  0      
241246  1  0      
238247  1  0      
224247  1  0      
247248  1  6      
248249  2  0      
249250  2  0      
206251  2  0      
206252  1  0      
252253  1  0      
255254  1  1      
255256  1  0      
256257  1  0      
257258  1  0      
258259  1  0      
259260  1  0      
260255  1  0      
256261  1  1      
259262  1  1      
260263  1  6      
258292  1  6      
263264  1  0      
262265  1  0      
264266  1  0      
266267  2  0      
267268  1  0      
268269  2  0      
269270  1  0      
270271  2  0      
271266  1  0      
265272  1  0      
265273  2  0      
272274  2  0      
274275  1  0      
275276  2  0      
276277  1  0      
277278  2  0      
278272  1  0      
279309  1  6      
279280  1  0      
280281  1  0      
281282  1  1      
282283  1  0      
283284  1  0      
284285  1  0      
285286  2  0      
286287  1  0      
287288  2  0      
288289  1  0      
289290  2  0      
285290  1  0      
281291  1  0      
291292  1  6      
291293  1  0      
293294  1  1      
294295  1  0      
295296  1  0      
296297  2  0      
297298  1  0      
298299  2  0      
299300  1  0      
300301  2  0      
296301  1  0      
293302  1  0      
279302  1  0      
302303  1  6      
303304  2  0      
304305  2  0      
261306  2  0      
261307  1  0      
307308  1  0      
310309  1  1      
310311  1  0      
311312  1  0      
312313  1  0      
313314  1  0      
314315  1  0      
315310  1  0      
311316  1  1      
314317  1  1      
315318  1  6      
313337  1  6      
318319  1  0      
317320  1  0      
319321  1  0      
321322  2  0      
322323  1  0      
323324  2  0      
324325  1  0      
325326  2  0      
326321  1  0      
320327  1  0      
320328  2  0      
327329  2  0      
329330  1  0      
330331  2  0      
331332  1  0      
332333  2  0      
333327  1  0      
316334  2  0      
316335  1  0      
335336  1  0      
337338  1  0      
338339  1  0      
339340  1  0      
340349  1  0      
339341  1  6      
341348  1  0      
342343  2  0      
343344  1  0      
344345  2  0      
345346  1  0      
346347  2  0      
342347  1  0      
342348  1  0      
349356  1  0      
350351  2  0      
351352  1  0      
352353  2  0      
353354  1  0      
354355  2  0      
350355  1  0      
350356  1  0      
M  CHG  8  33   1  34  -1  84   1  85  -1 139   1 140  -1 194   1 195  -1
M  CHG  4 249   1 250  -1 304   1 305  -1
M  END
