# Supplementary material for: Tetrasaccharide iteration synthesis of a heparin-like dodecasaccharide and radiolabelling for in vivo tissue distribution studies
Source: Springer Nature journal article supplement (doi:10.1038/ncomms3016), 2013-07-05
Supplement: 41467_2013_BFncomms3016_MOESM23_ESM.mol [file 41467_2013_BFncomms3016_MOESM23_ESM.mol]

  ChemDraw06041310152D

215207  0  0  0  0  0  0  0  0999 V2000
   10.4226   -3.1449    0.0000 Na  0  3  0  0  0  0  0  0  0  0  0  0
    5.5237    0.2930    0.0000 Na  0  3  0  0  0  0  0  0  0  0  0  0
    0.4528    3.7738    0.0000 Na  0  3  0  0  0  0  0  0  0  0  0  0
   -4.6180    7.2547    0.0000 Na  0  3  0  0  0  0  0  0  0  0  0  0
   -9.6030   10.7785    0.0000 Na  0  3  0  0  0  0  0  0  0  0  0  0
   15.4505   -6.6687    0.0000 Na  0  3  0  0  0  0  0  0  0  0  0  0
  -17.6316   11.2564    0.0000 Na  0  3  0  0  0  0  0  0  0  0  0  0
   -8.1216    2.0933    0.0000 Na  0  3  0  0  0  0  0  0  0  0  0  0
  -12.4047    4.3422    0.0000 Na  0  3  0  0  0  0  0  0  0  0  0  0
  -13.1748    5.6366    0.0000 Na  0  3  0  0  0  0  0  0  0  0  0  0
  -17.4149    7.8425    0.0000 Na  0  3  0  0  0  0  0  0  0  0  0  0
    1.9102   -4.9015    0.0000 Na  0  3  0  0  0  0  0  0  0  0  0  0
   -2.3728   -2.6526    0.0000 Na  0  3  0  0  0  0  0  0  0  0  0  0
   -3.1430   -1.3582    0.0000 Na  0  3  0  0  0  0  0  0  0  0  0  0
   -7.3830    0.8477    0.0000 Na  0  3  0  0  0  0  0  0  0  0  0  0
   11.6478   -8.7769    0.0000 C   0  0  0  0  0  0  0  0  0  0  0  0
   12.0489   -8.0560    0.0000 O   0  0  0  0  0  0  0  0  0  0  0  0
   11.6252   -7.3481    0.0000 C   0  0  0  0  0  0  0  0  0  0  0  0
   12.0263   -6.6272    0.0000 C   0  0  0  0  0  0  0  0  0  0  0  0
   11.6025   -5.9194    0.0000 O   0  0  0  0  0  0  0  0  0  0  0  0
   10.8003   -7.3612    0.0000 C   0  0  0  0  0  0  0  0  0  0  0  0
   10.3765   -6.6534    0.0000 O   0  0  0  0  0  0  0  0  0  0  0  0
   10.3991   -8.0821    0.0000 C   0  0  0  0  0  0  0  0  0  0  0  0
    9.5743   -8.0952    0.0000 O   0  0  0  0  0  0  0  0  0  0  0  0
   10.8229   -8.7900    0.0000 C   0  0  0  0  0  0  0  0  0  0  0  0
   10.4218   -9.5109    0.0000 N   0  0  0  0  0  0  0  0  0  0  0  0
   12.0716   -9.4847    0.0000 O   0  0  0  0  0  0  0  0  0  0  0  0
   12.8805   -9.6322    0.0000 C   0  0  0  0  0  0  0  0  0  0  0  0
   13.1582  -10.4090    0.0000 C   0  0  0  0  0  0  0  0  0  0  0  0
   13.9698  -10.5570    0.0000 O   0  0  0  0  0  0  0  0  0  0  0  0
   14.5037   -9.9281    0.0000 C   0  0  0  0  0  0  0  0  0  0  0  0
   14.2261   -9.1512    0.0000 C   0  0  0  0  0  0  0  0  0  0  0  0
   13.4144   -9.0033    0.0000 C   0  0  0  0  0  0  0  0  0  0  0  0
   12.6260  -11.0358    0.0000 C   0  0  0  0  0  0  0  0  0  0  0  0
   14.7582   -8.5244    0.0000 O   0  0  0  0  0  0  0  0  0  0  0  0
   13.1377   -8.2290    0.0000 O   0  0  0  0  0  0  0  0  0  0  0  0
   11.8171  -10.8884    0.0000 O   0  0  0  0  0  0  0  0  0  0  0  0
   12.9028  -11.8101    0.0000 O   0  5  0  0  0  0  0  0  0  0  0  0
   15.3126  -10.0755    0.0000 O   0  0  0  0  0  0  0  0  0  0  0  0
   15.6351  -10.8594    0.0000 C   0  0  0  0  0  0  0  0  0  0  0  0
   16.4723  -10.9721    0.0000 C   0  0  0  0  0  0  0  0  0  0  0  0
   16.7936  -11.7537    0.0000 C   0  0  0  0  0  0  0  0  0  0  0  0
   16.9890  -10.3032    0.0000 O   0  0  0  0  0  0  0  0  0  0  0  0
   17.6316  -11.8663    0.0000 O   0  0  0  0  0  0  0  0  0  0  0  0
    9.5969   -9.5240    0.0000 S   0  0  0  0  0  0  0  0  0  0  0  0
    9.6316  -10.3482    0.0000 O   0  0  0  0  0  0  0  0  0  0  0  0
    8.7731   -9.5677    0.0000 O   0  5  0  0  0  0  0  0  0  0  0  0
    9.6042   -8.6990    0.0000 O   0  0  0  0  0  0  0  0  0  0  0  0
    6.6376   -5.2766    0.0000 C   0  0  0  0  0  0  0  0  0  0  0  0
    7.0387   -4.5556    0.0000 O   0  0  0  0  0  0  0  0  0  0  0  0
    6.6149   -3.8478    0.0000 C   0  0  0  0  0  0  0  0  0  0  0  0
    7.0160   -3.1269    0.0000 C   0  0  0  0  0  0  0  0  0  0  0  0
    6.5923   -2.4190    0.0000 O   0  0  0  0  0  0  0  0  0  0  0  0
    5.7900   -3.8609    0.0000 C   0  0  0  0  0  0  0  0  0  0  0  0
    5.3663   -3.1530    0.0000 O   0  0  0  0  0  0  0  0  0  0  0  0
    5.3889   -4.5818    0.0000 C   0  0  0  0  0  0  0  0  0  0  0  0
    4.5640   -4.5949    0.0000 O   0  0  0  0  0  0  0  0  0  0  0  0
    5.8127   -5.2896    0.0000 C   0  0  0  0  0  0  0  0  0  0  0  0
    5.4116   -6.0106    0.0000 N   0  0  0  0  0  0  0  0  0  0  0  0
    7.0614   -5.9844    0.0000 O   0  0  0  0  0  0  0  0  0  0  0  0
    7.8703   -6.1318    0.0000 C   0  0  0  0  0  0  0  0  0  0  0  0
    8.1479   -6.9087    0.0000 C   0  0  0  0  0  0  0  0  0  0  0  0
    8.9596   -7.0567    0.0000 O   0  0  0  0  0  0  0  0  0  0  0  0
    9.4935   -6.4277    0.0000 C   0  0  0  0  0  0  0  0  0  0  0  0
    9.2158   -5.6509    0.0000 C   0  0  0  0  0  0  0  0  0  0  0  0
    8.4042   -5.5029    0.0000 C   0  0  0  0  0  0  0  0  0  0  0  0
    7.6158   -7.5355    0.0000 C   0  0  0  0  0  0  0  0  0  0  0  0
    9.7480   -5.0241    0.0000 O   0  0  0  0  0  0  0  0  0  0  0  0
    8.1274   -4.7287    0.0000 O   0  0  0  0  0  0  0  0  0  0  0  0
    6.8069   -7.3881    0.0000 O   0  0  0  0  0  0  0  0  0  0  0  0
    7.8925   -8.3098    0.0000 O   0  5  0  0  0  0  0  0  0  0  0  0
    4.5867   -6.0236    0.0000 S   0  0  0  0  0  0  0  0  0  0  0  0
    4.6213   -6.8479    0.0000 O   0  0  0  0  0  0  0  0  0  0  0  0
    3.7628   -6.0674    0.0000 O   0  5  0  0  0  0  0  0  0  0  0  0
    4.5940   -5.1987    0.0000 O   0  0  0  0  0  0  0  0  0  0  0  0
    1.6313   -1.8099    0.0000 C   0  0  0  0  0  0  0  0  0  0  0  0
    2.0324   -1.0890    0.0000 O   0  0  0  0  0  0  0  0  0  0  0  0
    1.6087   -0.3811    0.0000 C   0  0  0  0  0  0  0  0  0  0  0  0
    2.0098    0.3398    0.0000 C   0  0  0  0  0  0  0  0  0  0  0  0
    1.5860    1.0476    0.0000 O   0  0  0  0  0  0  0  0  0  0  0  0
    0.7838   -0.3942    0.0000 C   0  0  0  0  0  0  0  0  0  0  0  0
    0.3600    0.3136    0.0000 O   0  0  0  0  0  0  0  0  0  0  0  0
    0.3826   -1.1151    0.0000 C   0  0  0  0  0  0  0  0  0  0  0  0
   -0.4423   -1.1282    0.0000 O   0  0  0  0  0  0  0  0  0  0  0  0
    0.8064   -1.8230    0.0000 C   0  0  0  0  0  0  0  0  0  0  0  0
    0.4053   -2.5439    0.0000 N   0  0  0  0  0  0  0  0  0  0  0  0
    2.0551   -2.5177    0.0000 O   0  0  0  0  0  0  0  0  0  0  0  0
    2.8640   -2.6652    0.0000 C   0  0  0  0  0  0  0  0  0  0  0  0
    3.1417   -3.4421    0.0000 C   0  0  0  0  0  0  0  0  0  0  0  0
    3.9533   -3.5900    0.0000 O   0  0  0  0  0  0  0  0  0  0  0  0
    4.4872   -2.9611    0.0000 C   0  0  0  0  0  0  0  0  0  0  0  0
    4.2095   -2.1842    0.0000 C   0  0  0  0  0  0  0  0  0  0  0  0
    3.3979   -2.0363    0.0000 C   0  0  0  0  0  0  0  0  0  0  0  0
    2.6095   -4.0689    0.0000 C   0  0  0  0  0  0  0  0  0  0  0  0
    4.7417   -1.5574    0.0000 O   0  0  0  0  0  0  0  0  0  0  0  0
    3.1212   -1.2620    0.0000 O   0  0  0  0  0  0  0  0  0  0  0  0
    1.8006   -3.9214    0.0000 O   0  0  0  0  0  0  0  0  0  0  0  0
    2.8863   -4.8431    0.0000 O   0  5  0  0  0  0  0  0  0  0  0  0
   -0.4196   -2.5570    0.0000 S   0  0  0  0  0  0  0  0  0  0  0  0
   -0.3849   -3.3813    0.0000 O   0  0  0  0  0  0  0  0  0  0  0  0
   -1.2434   -2.6007    0.0000 O   0  5  0  0  0  0  0  0  0  0  0  0
   -0.4123   -1.7320    0.0000 O   0  0  0  0  0  0  0  0  0  0  0  0
   -3.3789    1.6904    0.0000 C   0  0  0  0  0  0  0  0  0  0  0  0
   -2.9778    2.4113    0.0000 O   0  0  0  0  0  0  0  0  0  0  0  0
   -3.4016    3.1192    0.0000 C   0  0  0  0  0  0  0  0  0  0  0  0
   -3.0005    3.8401    0.0000 C   0  0  0  0  0  0  0  0  0  0  0  0
   -3.4242    4.5479    0.0000 O   0  0  0  0  0  0  0  0  0  0  0  0
   -4.2265    3.1061    0.0000 C   0  0  0  0  0  0  0  0  0  0  0  0
   -4.6503    3.8139    0.0000 O   0  0  0  0  0  0  0  0  0  0  0  0
   -4.6276    2.3852    0.0000 C   0  0  0  0  0  0  0  0  0  0  0  0
   -5.4525    2.3721    0.0000 O   0  0  0  0  0  0  0  0  0  0  0  0
   -4.2038    1.6773    0.0000 C   0  0  0  0  0  0  0  0  0  0  0  0
   -4.6049    0.9564    0.0000 N   0  0  0  0  0  0  0  0  0  0  0  0
   -2.9551    0.9826    0.0000 O   0  0  0  0  0  0  0  0  0  0  0  0
   -2.1463    0.8351    0.0000 C   0  0  0  0  0  0  0  0  0  0  0  0
   -1.8686    0.0583    0.0000 C   0  0  0  0  0  0  0  0  0  0  0  0
   -1.0569   -0.0897    0.0000 O   0  0  0  0  0  0  0  0  0  0  0  0
   -0.5230    0.5392    0.0000 C   0  0  0  0  0  0  0  0  0  0  0  0
   -0.8007    1.3161    0.0000 C   0  0  0  0  0  0  0  0  0  0  0  0
   -1.6123    1.4640    0.0000 C   0  0  0  0  0  0  0  0  0  0  0  0
   -2.4007   -0.5685    0.0000 C   0  0  0  0  0  0  0  0  0  0  0  0
   -0.2685    1.9429    0.0000 O   0  0  0  0  0  0  0  0  0  0  0  0
   -1.8891    2.2383    0.0000 O   0  0  0  0  0  0  0  0  0  0  0  0
   -3.2096   -0.4211    0.0000 O   0  0  0  0  0  0  0  0  0  0  0  0
   -2.1240   -1.3428    0.0000 O   0  5  0  0  0  0  0  0  0  0  0  0
   -5.4298    0.9433    0.0000 S   0  0  0  0  0  0  0  0  0  0  0  0
   -5.3952    0.1191    0.0000 O   0  0  0  0  0  0  0  0  0  0  0  0
   -6.2537    0.8996    0.0000 O   0  5  0  0  0  0  0  0  0  0  0  0
   -5.4225    1.7683    0.0000 O   0  0  0  0  0  0  0  0  0  0  0  0
   -8.4005    5.1849    0.0000 C   0  0  0  0  0  0  0  0  0  0  0  0
   -7.9994    5.9058    0.0000 O   0  0  0  0  0  0  0  0  0  0  0  0
   -8.4232    6.6137    0.0000 C   0  0  0  0  0  0  0  0  0  0  0  0
   -8.0221    7.3346    0.0000 C   0  0  0  0  0  0  0  0  0  0  0  0
   -8.4459    8.0424    0.0000 O   0  0  0  0  0  0  0  0  0  0  0  0
   -9.2481    6.6006    0.0000 C   0  0  0  0  0  0  0  0  0  0  0  0
   -9.6719    7.3084    0.0000 O   0  0  0  0  0  0  0  0  0  0  0  0
   -9.6492    5.8797    0.0000 C   0  0  0  0  0  0  0  0  0  0  0  0
  -10.4741    5.8666    0.0000 O   0  0  0  0  0  0  0  0  0  0  0  0
   -9.2254    5.1718    0.0000 C   0  0  0  0  0  0  0  0  0  0  0  0
   -9.6265    4.4509    0.0000 N   0  0  0  0  0  0  0  0  0  0  0  0
   -7.9768    4.4771    0.0000 O   0  0  0  0  0  0  0  0  0  0  0  0
   -7.1679    4.3296    0.0000 C   0  0  0  0  0  0  0  0  0  0  0  0
   -6.8902    3.5527    0.0000 C   0  0  0  0  0  0  0  0  0  0  0  0
   -6.0786    3.4048    0.0000 O   0  0  0  0  0  0  0  0  0  0  0  0
   -5.5446    4.0337    0.0000 C   0  0  0  0  0  0  0  0  0  0  0  0
   -5.8223    4.8106    0.0000 C   0  0  0  0  0  0  0  0  0  0  0  0
   -6.6339    4.9585    0.0000 C   0  0  0  0  0  0  0  0  0  0  0  0
   -7.4223    2.9259    0.0000 C   0  0  0  0  0  0  0  0  0  0  0  0
   -5.2901    5.4374    0.0000 O   0  0  0  0  0  0  0  0  0  0  0  0
   -6.9107    5.7328    0.0000 O   0  0  0  0  0  0  0  0  0  0  0  0
   -8.2312    3.0734    0.0000 O   0  0  0  0  0  0  0  0  0  0  0  0
   -7.1456    2.1517    0.0000 O   0  5  0  0  0  0  0  0  0  0  0  0
  -10.4514    4.4378    0.0000 S   0  0  0  0  0  0  0  0  0  0  0  0
  -10.4168    3.6135    0.0000 O   0  0  0  0  0  0  0  0  0  0  0  0
  -11.2753    4.3941    0.0000 O   0  5  0  0  0  0  0  0  0  0  0  0
  -10.4441    5.2628    0.0000 O   0  0  0  0  0  0  0  0  0  0  0  0
  -13.4108    8.6852    0.0000 C   0  0  0  0  0  0  0  0  0  0  0  0
  -13.0097    9.4061    0.0000 O   0  0  0  0  0  0  0  0  0  0  0  0
  -13.4334   10.1140    0.0000 C   0  0  0  0  0  0  0  0  0  0  0  0
  -13.0323   10.8349    0.0000 C   0  0  0  0  0  0  0  0  0  0  0  0
  -13.4561   11.5427    0.0000 O   0  0  0  0  0  0  0  0  0  0  0  0
  -14.2583   10.1009    0.0000 C   0  0  0  0  0  0  0  0  0  0  0  0
  -14.6821   10.8087    0.0000 O   0  0  0  0  0  0  0  0  0  0  0  0
  -14.6594    9.3800    0.0000 C   0  0  0  0  0  0  0  0  0  0  0  0
  -15.4843    9.3669    0.0000 O   0  0  0  0  0  0  0  0  0  0  0  0
  -14.2357    8.6721    0.0000 C   0  0  0  0  0  0  0  0  0  0  0  0
  -14.6368    7.9512    0.0000 N   0  0  0  0  0  0  0  0  0  0  0  0
  -12.9870    7.9774    0.0000 O   0  0  0  0  0  0  0  0  0  0  0  0
  -12.1781    7.8299    0.0000 C   0  0  0  0  0  0  0  0  0  0  0  0
  -11.9004    7.0531    0.0000 C   0  0  0  0  0  0  0  0  0  0  0  0
  -11.0888    6.9051    0.0000 O   0  0  0  0  0  0  0  0  0  0  0  0
  -10.5548    7.5340    0.0000 C   0  0  0  0  0  0  0  0  0  0  0  0
  -10.8325    8.3109    0.0000 C   0  0  0  0  0  0  0  0  0  0  0  0
  -11.6442    8.4588    0.0000 C   0  0  0  0  0  0  0  0  0  0  0  0
  -12.4326    6.4263    0.0000 C   0  0  0  0  0  0  0  0  0  0  0  0
  -10.3004    8.9377    0.0000 O   0  0  0  0  0  0  0  0  0  0  0  0
  -11.9209    9.2331    0.0000 O   0  0  0  0  0  0  0  0  0  0  0  0
  -13.2415    6.5737    0.0000 O   0  0  0  0  0  0  0  0  0  0  0  0
  -12.1558    5.6520    0.0000 O   0  5  0  0  0  0  0  0  0  0  0  0
  -15.4617    7.9381    0.0000 S   0  0  0  0  0  0  0  0  0  0  0  0
  -15.4270    7.1139    0.0000 O   0  0  0  0  0  0  0  0  0  0  0  0
  -16.2855    7.8944    0.0000 O   0  5  0  0  0  0  0  0  0  0  0  0
  -15.4544    8.7631    0.0000 O   0  0  0  0  0  0  0  0  0  0  0  0
  -15.6015   11.0863    0.0000 S   0  0  0  0  0  0  0  0  0  0  0  0
  -15.8238   10.2918    0.0000 O   0  0  0  0  0  0  0  0  0  0  0  0
  -16.3984   11.2999    0.0000 O   0  5  0  0  0  0  0  0  0  0  0  0
  -15.3391   11.8685    0.0000 O   0  0  0  0  0  0  0  0  0  0  0  0
  -10.3015    9.9121    0.0000 S   0  0  0  0  0  0  0  0  0  0  0  0
  -11.1264    9.9044    0.0000 O   0  0  0  0  0  0  0  0  0  0  0  0
  -10.3183   10.7370    0.0000 O   0  5  0  0  0  0  0  0  0  0  0  0
   -9.4772    9.8779    0.0000 O   0  0  0  0  0  0  0  0  0  0  0  0
   14.7590   -7.5315    0.0000 S   0  0  0  0  0  0  0  0  0  0  0  0
   13.9341   -7.5393    0.0000 O   0  0  0  0  0  0  0  0  0  0  0  0
   14.7422   -6.7067    0.0000 O   0  5  0  0  0  0  0  0  0  0  0  0
   15.5833   -7.5657    0.0000 O   0  0  0  0  0  0  0  0  0  0  0  0
   -0.2960    2.9540    0.0000 S   0  0  0  0  0  0  0  0  0  0  0  0
   -1.1210    2.9462    0.0000 O   0  0  0  0  0  0  0  0  0  0  0  0
   -0.3128    3.7788    0.0000 O   0  5  0  0  0  0  0  0  0  0  0  0
    0.5283    2.9198    0.0000 O   0  0  0  0  0  0  0  0  0  0  0  0
    9.7455   -4.0077    0.0000 S   0  0  0  0  0  0  0  0  0  0  0  0
    8.9205   -4.0155    0.0000 O   0  0  0  0  0  0  0  0  0  0  0  0
    9.7286   -3.1829    0.0000 O   0  5  0  0  0  0  0  0  0  0  0  0
   10.5698   -4.0419    0.0000 O   0  0  0  0  0  0  0  0  0  0  0  0
    4.7462   -0.5555    0.0000 S   0  0  0  0  0  0  0  0  0  0  0  0
    3.9213   -0.5633    0.0000 O   0  0  0  0  0  0  0  0  0  0  0  0
    4.7294    0.2693    0.0000 O   0  5  0  0  0  0  0  0  0  0  0  0
    5.5705   -0.5897    0.0000 O   0  0  0  0  0  0  0  0  0  0  0  0
   -5.3096    6.4492    0.0000 S   0  0  0  0  0  0  0  0  0  0  0  0
   -6.1345    6.4414    0.0000 O   0  0  0  0  0  0  0  0  0  0  0  0
   -5.3264    7.2740    0.0000 O   0  5  0  0  0  0  0  0  0  0  0  0
   -4.4853    6.4150    0.0000 O   0  0  0  0  0  0  0  0  0  0  0  0
   11.9267  -11.8685    0.0000 Na  0  3  0  0  0  0  0  0  0  0  0  0
    7.6437   -9.6196    0.0000 Na  0  3  0  0  0  0  0  0  0  0  0  0
    6.8735   -8.3252    0.0000 Na  0  3  0  0  0  0  0  0  0  0  0  0
    2.6335   -6.1192    0.0000 Na  0  3  0  0  0  0  0  0  0  0  0  0
 16 27  1  6      
 16 17  1  0      
 17 18  1  0      
 18 19  1  1      
 19 20  1  0      
 18 21  1  0      
 21 22  1  6      
 21 23  1  0      
 23 24  1  1      
 23 25  1  0      
 16 25  1  0      
 25 26  1  6      
 28 27  1  1      
 28 29  1  0      
 29 30  1  0      
 30 31  1  0      
 31 32  1  0      
 32 33  1  0      
 33 28  1  0      
 29 34  1  1      
 32 35  1  1      
 33 36  1  6      
 31 39  1  6      
 34 37  2  0      
 34 38  1  0      
 39 40  1  0      
 40 41  1  0      
 41 42  1  0      
 42 44  1  0      
 41 43  1  6      
 26 45  1  0      
 45 46  2  0      
 45 47  1  0      
 45 48  2  0      
 49 60  1  6      
 49 50  1  0      
 50 51  1  0      
 51 52  1  1      
 52 53  1  0      
 51 54  1  0      
 54 55  1  6      
 54 56  1  0      
 56 57  1  1      
 56 58  1  0      
 49 58  1  0      
 58 59  1  6      
 61 60  1  1      
 61 62  1  0      
 62 63  1  0      
 63 64  1  0      
 64 65  1  0      
 65 66  1  0      
 66 61  1  0      
 62 67  1  1      
 65 68  1  1      
 66 69  1  6      
 67 70  2  0      
 67 71  1  0      
 59 72  1  0      
 72 73  2  0      
 72 74  1  0      
 72 75  2  0      
 64 22  1  6      
 76 87  1  6      
 76 77  1  0      
 77 78  1  0      
 78 79  1  1      
 79 80  1  0      
 78 81  1  0      
 81 82  1  6      
 81 83  1  0      
 83 84  1  1      
 83 85  1  0      
 76 85  1  0      
 85 86  1  6      
 88 87  1  1      
 88 89  1  0      
 89 90  1  0      
 90 91  1  0      
 91 92  1  0      
 92 93  1  0      
 93 88  1  0      
 89 94  1  1      
 92 95  1  1      
 93 96  1  6      
 94 97  2  0      
 94 98  1  0      
 86 99  1  0      
 99100  2  0      
 99101  1  0      
 99102  2  0      
103114  1  6      
103104  1  0      
104105  1  0      
105106  1  1      
106107  1  0      
105108  1  0      
108109  1  6      
108110  1  0      
110111  1  1      
110112  1  0      
103112  1  0      
112113  1  6      
115114  1  1      
115116  1  0      
116117  1  0      
117118  1  0      
118119  1  0      
119120  1  0      
120115  1  0      
116121  1  1      
119122  1  1      
120123  1  6      
121124  2  0      
121125  1  0      
113126  1  0      
126127  2  0      
126128  1  0      
126129  2  0      
118 82  1  6      
 91 55  1  6      
130141  1  6      
130131  1  0      
131132  1  0      
132133  1  1      
133134  1  0      
132135  1  0      
135136  1  6      
135137  1  0      
137138  1  1      
137139  1  0      
130139  1  0      
139140  1  6      
142141  1  1      
142143  1  0      
143144  1  0      
144145  1  0      
145146  1  0      
146147  1  0      
147142  1  0      
143148  1  1      
146149  1  1      
147150  1  6      
148151  2  0      
148152  1  0      
140153  1  0      
153154  2  0      
153155  1  0      
153156  2  0      
157168  1  6      
157158  1  0      
158159  1  0      
159160  1  1      
160161  1  0      
159162  1  0      
162163  1  6      
162164  1  0      
164165  1  1      
164166  1  0      
157166  1  0      
166167  1  6      
169168  1  1      
169170  1  0      
170171  1  0      
171172  1  0      
172173  1  0      
173174  1  0      
174169  1  0      
170175  1  1      
173176  1  1      
174177  1  6      
175178  2  0      
175179  1  0      
167180  1  0      
180181  2  0      
180182  1  0      
180183  2  0      
172136  1  6      
145109  1  6      
184185  2  0      
184186  1  0      
184187  2  0      
163184  1  0      
188189  2  0      
188190  1  0      
188191  2  0      
192193  2  0      
192194  1  0      
192195  2  0      
176188  1  0      
196197  2  0      
196198  1  0      
196199  2  0      
200201  2  0      
200202  1  0      
200203  2  0      
204205  2  0      
204206  1  0      
204207  2  0      
208209  2  0      
208210  1  0      
208211  2  0      
149208  1  0      
122196  1  0      
 95204  1  0      
 68200  1  0      
 35192  1  0      
M  CHG  8   1   1   2   1   3   1   4   1   5   1   6   1   7   1   8   1
M  CHG  8   9   1  10   1  11   1  12   1  13   1  14   1  15   1  38  -1
M  CHG  8  47  -1  71  -1  74  -1  98  -1 101  -1 125  -1 128  -1 152  -1
M  CHG  8 155  -1 179  -1 182  -1 186  -1 190  -1 194  -1 198  -1 202  -1
M  CHG  6 206  -1 210  -1 212   1 213   1 214   1 215   1
M  END
