# Supplementary material for: Tetrasaccharide iteration synthesis of a heparin-like dodecasaccharide and radiolabelling for in vivo tissue distribution studies
Source: PubMed Central journal article supplement — Nat Commun. 2013 Jul 5;4:2016. doi: 10.1038/ncomms3016 (PMC3715853; doi:10.1038/ncomms3016), 2013-07-05
Supplement: ncomms3016-s1.pdf [file ncomms3016-s1.pdf]

## Supplementary Information

# Tetrasaccharide iteration synthesis of a heparin-like dodecasaccharide and radiolabelling for *in vivo* tissue distribution studies

Steen U. Hansen,<sup>1</sup> Gavin J. Miller,<sup>1</sup> Claire Cole,<sup>2</sup> Graham Rushton,<sup>2</sup> Egle Avizienyte,<sup>2</sup> Gordon C. Jayson<sup>x2</sup> and John M. Gardiner<sup>x1\*</sup>

<sup>1</sup>*Manchester Institute of Biotechnology, School of Chemistry, Faculty of EPS, The University of Manchester 131 Princess Street, , Manchester M1 7DN, UK.*

<sup>2</sup>*School of Cancer and Enabling Sciences, The University of Manchester, Wilmslow Road, Manchester M20 4BX, UK.*  
*Correspondence and requests for materials should be addressed to [gardiner@manchester.ac.uk](mailto:gardiner@manchester.ac.uk)*

### Supplementary figures

NMR and Mass spectra

### Supplementary methods

Synthesis of oligosaccharides

# Supplementary figures

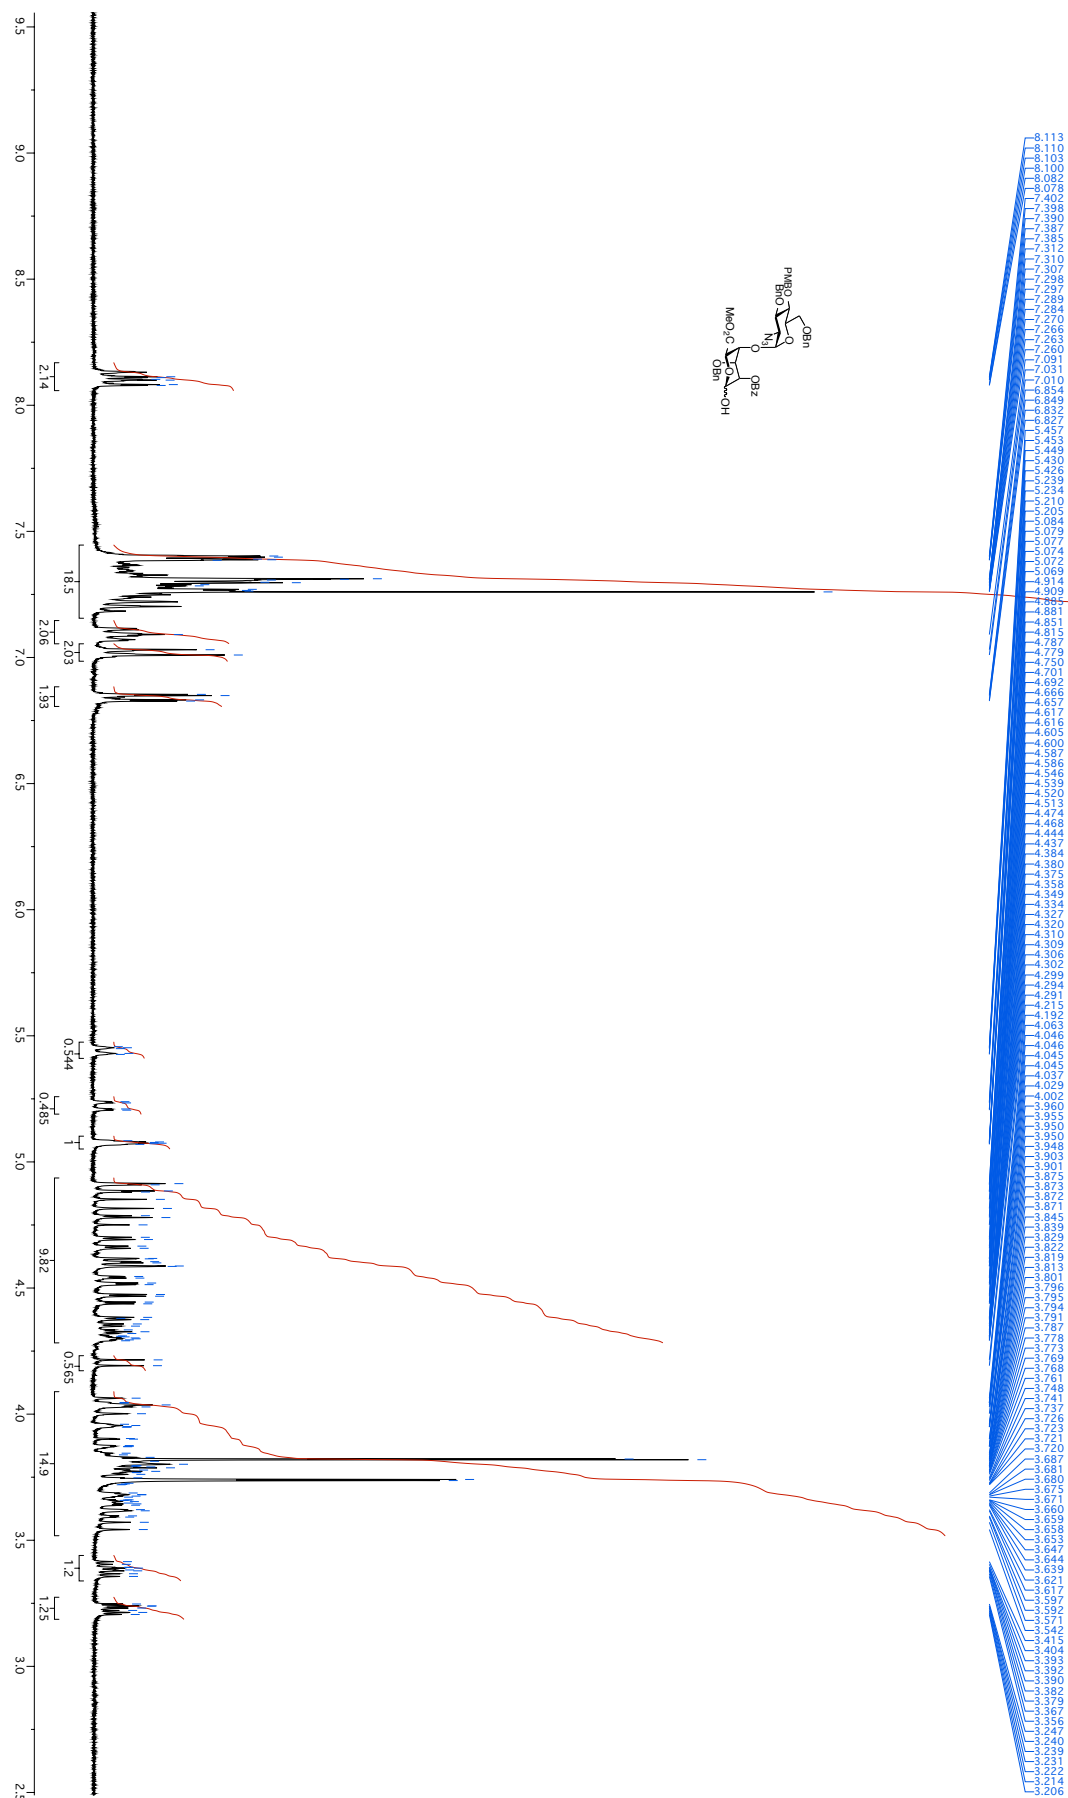

Supplementary Figure S1. <sup>1</sup>H NMR (400 MHz; CDCl<sub>3</sub>) spectrum for 3.

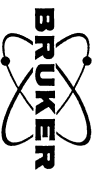

Current Data Parameters  
 NAME Jun28-2011-9and6  
 PROCNO 41

F2 - Acquisition Parameters  
 Date\_ 2011.05.20  
 Time 15.50  
 INSTRUM spect  
 PROBHD 5 mm Multinuc1  
 PULPROG zgpg30  
 TD 65536  
 SFO1 400.1319553 MHz  
 SOLVENT CDCl3

NS 1  
 DS 4  
 SWH 3063.728 Hz  
 FIDRES 1.459560 Hz  
 AQ 0.33428836 sec  
 RG 163.128  
 SFO2 100.628150 MHz  
 DE 6.00 usec  
 TE 300.0 K  
 D0 0.00000000 sec  
 d1 0.00000000 sec  
 d13 0.00000000 sec  
 D16 0.00020000 sec  
 INO 0.00032640 sec

===== CHANNEL f1 =====  
 NUC1 1H  
 P0 10.00 usec  
 PL1 -0.00 dB  
 SFO1 400.1319553 MHz

===== CHANNEL =====  
 GRNM1 GADUENT CHANNEL  
 SFO2 100.628150 MHz  
 GRNM2 SINE:100  
 GEZ1 10.00 %  
 GEZ2 10.00 %  
 F2 1000.00 usec

F1 - Acquisition Parameters  
 NFO 124  
 SFO1 400.132 MHz  
 FIDRES 23.935356 Hz  
 SN 7.657 ppm  
 FWHM05 QF

F2 - Processing parameters  
 SI 1024  
 SF 400.1300382 MHz  
 SSB 0  
 LB 0.00 Hz  
 GB 0  
 FC 1.40

F1 - Processing parameters  
 SI 1024  
 SF 400.1300382 MHz  
 SSB 0  
 MVM 0  
 SSB 0  
 LB 0.00 Hz  
 GB 0

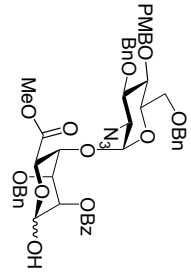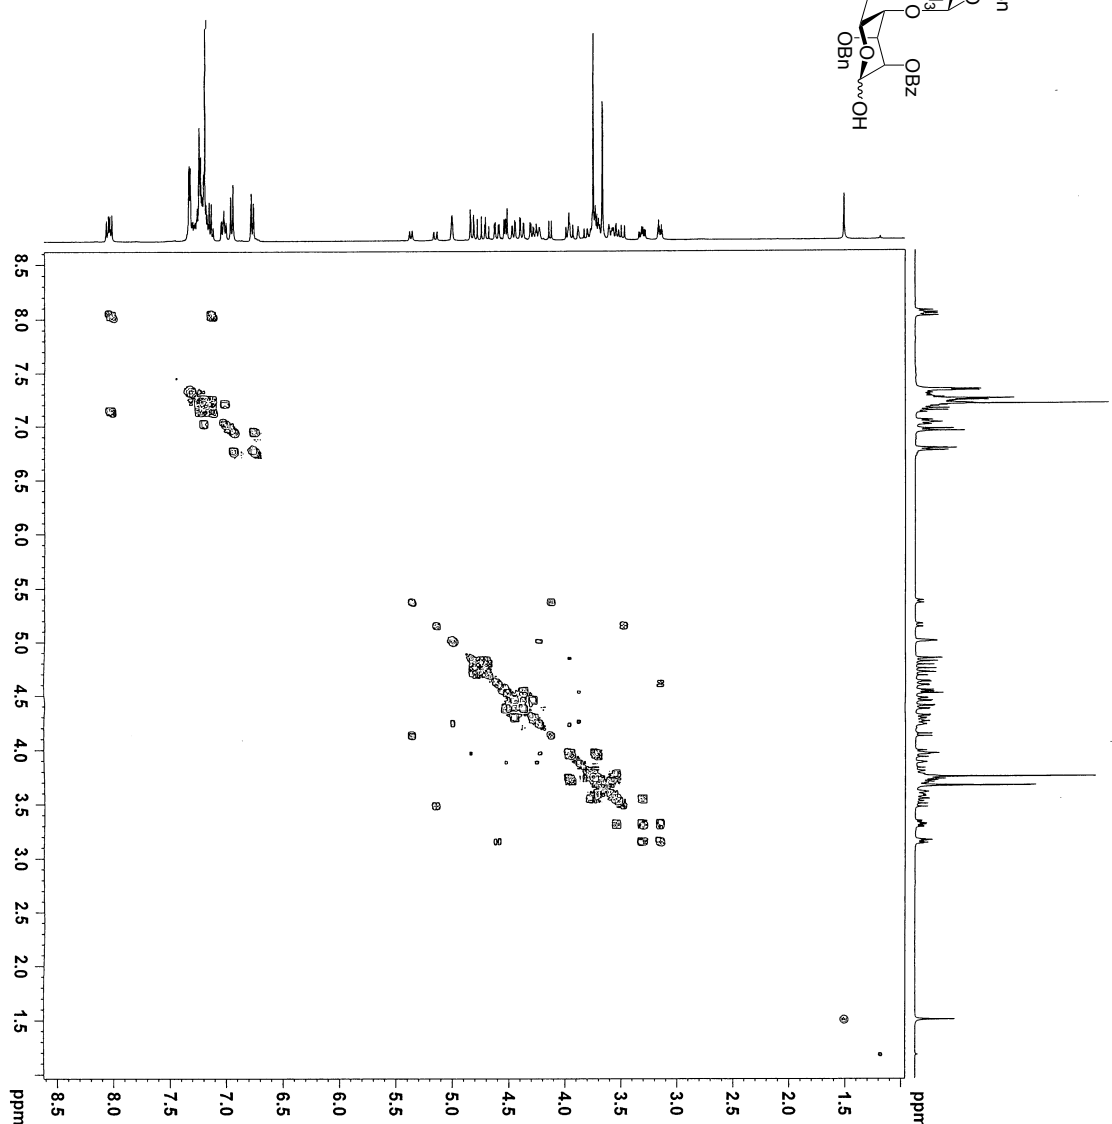

Supplementary Figure S2. COSY NMR spectrum for 3.

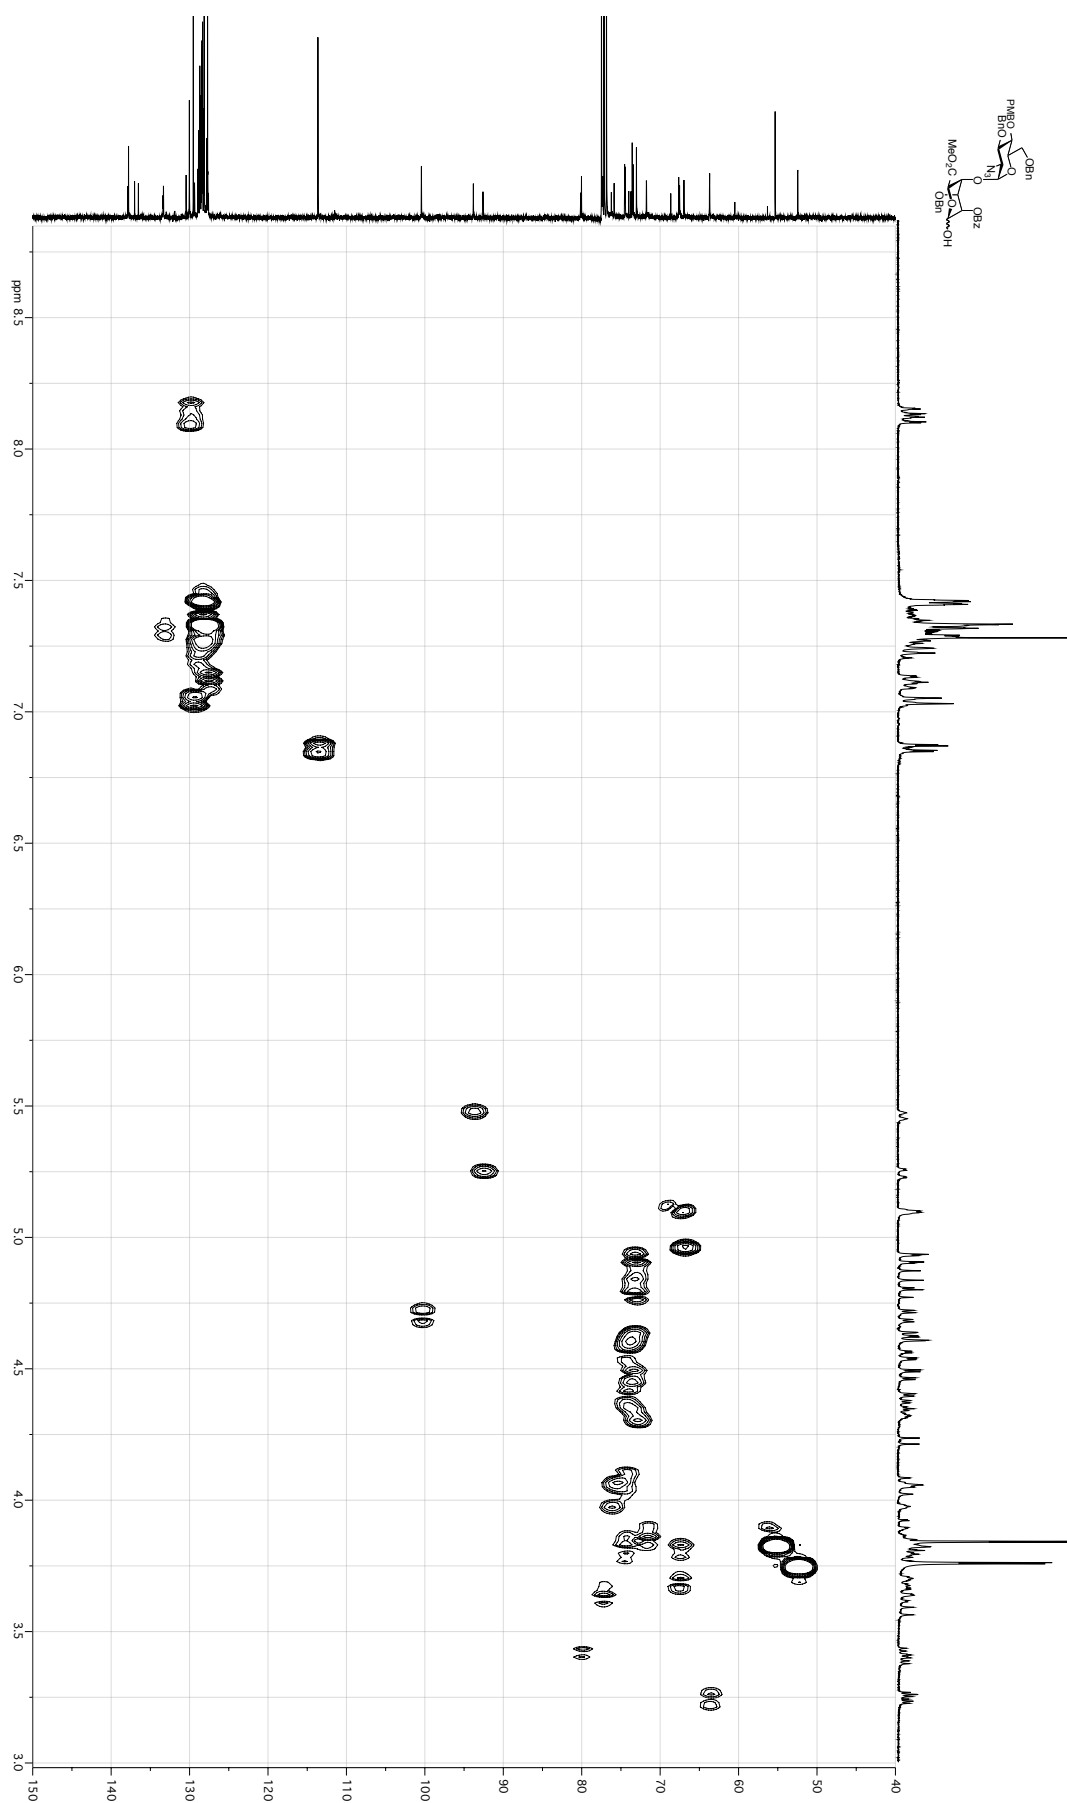

Supplementary Figure S3. HMQC NMR spectrum for 3.



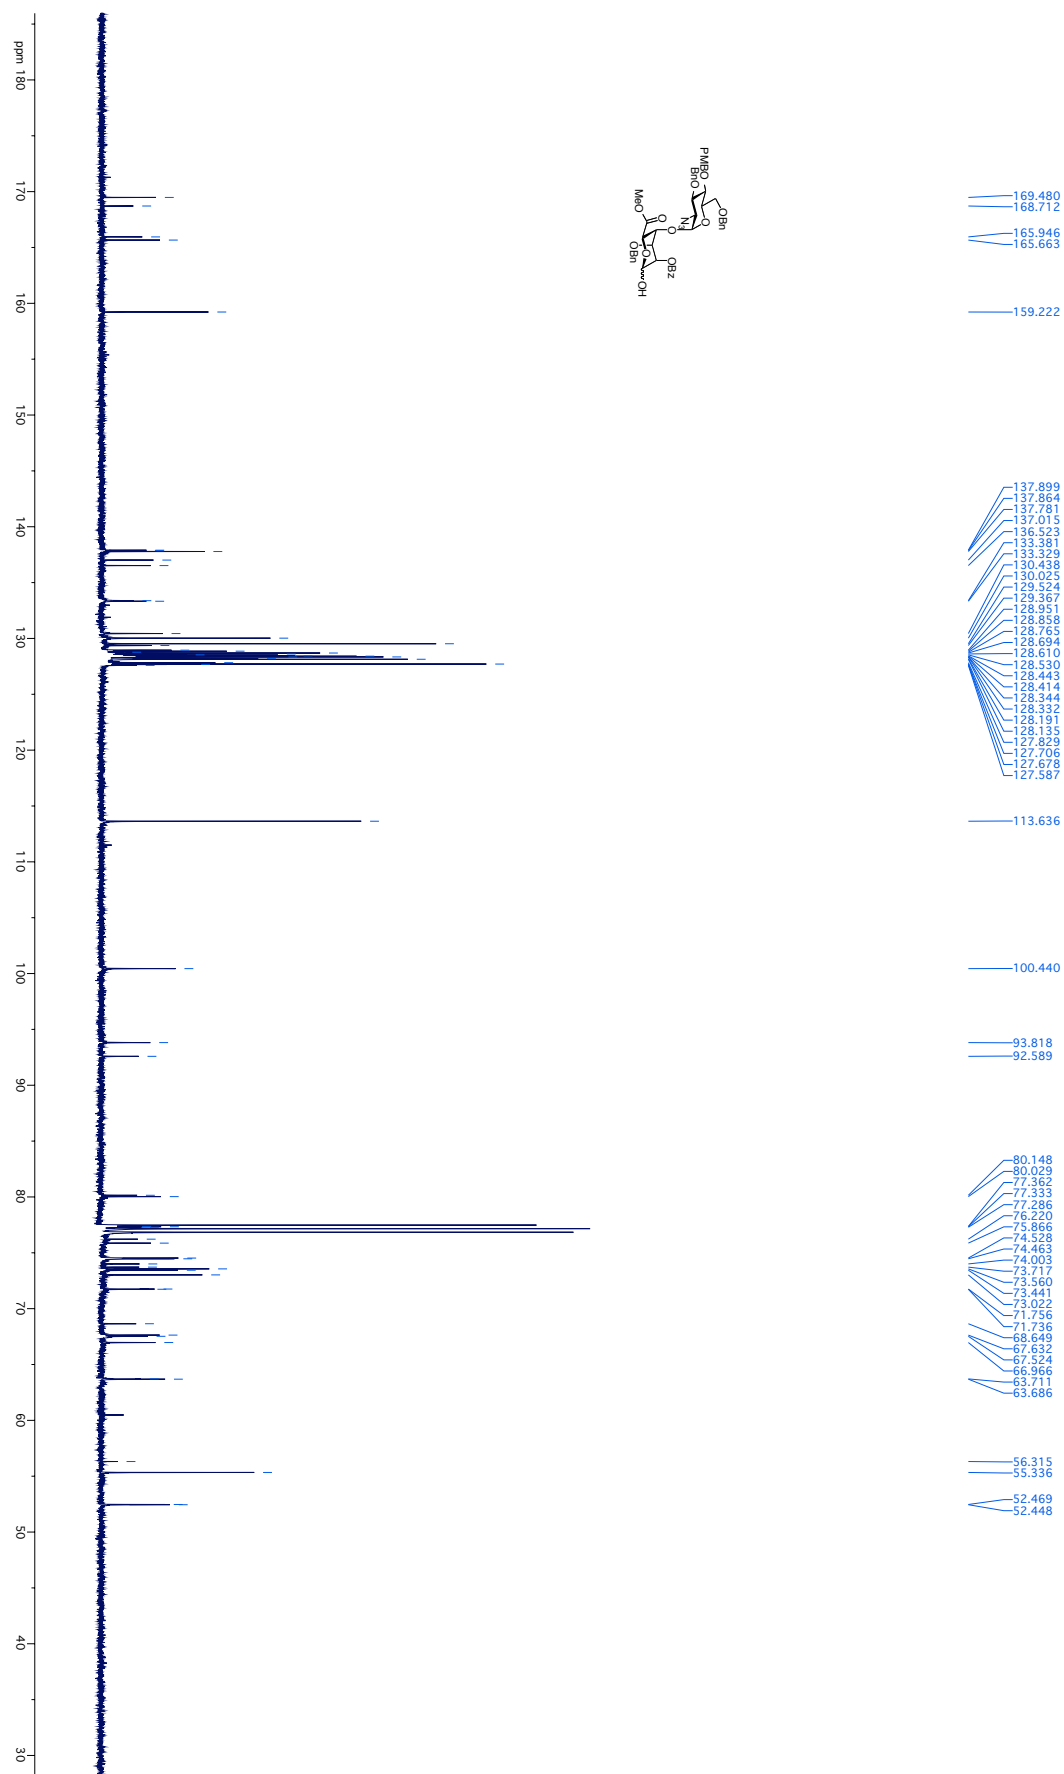

Supplementary Figure S4.  $^{13}\text{C}$  NMR (100 MHz;  $\text{CDCl}_3$ ) spectrum for 3.

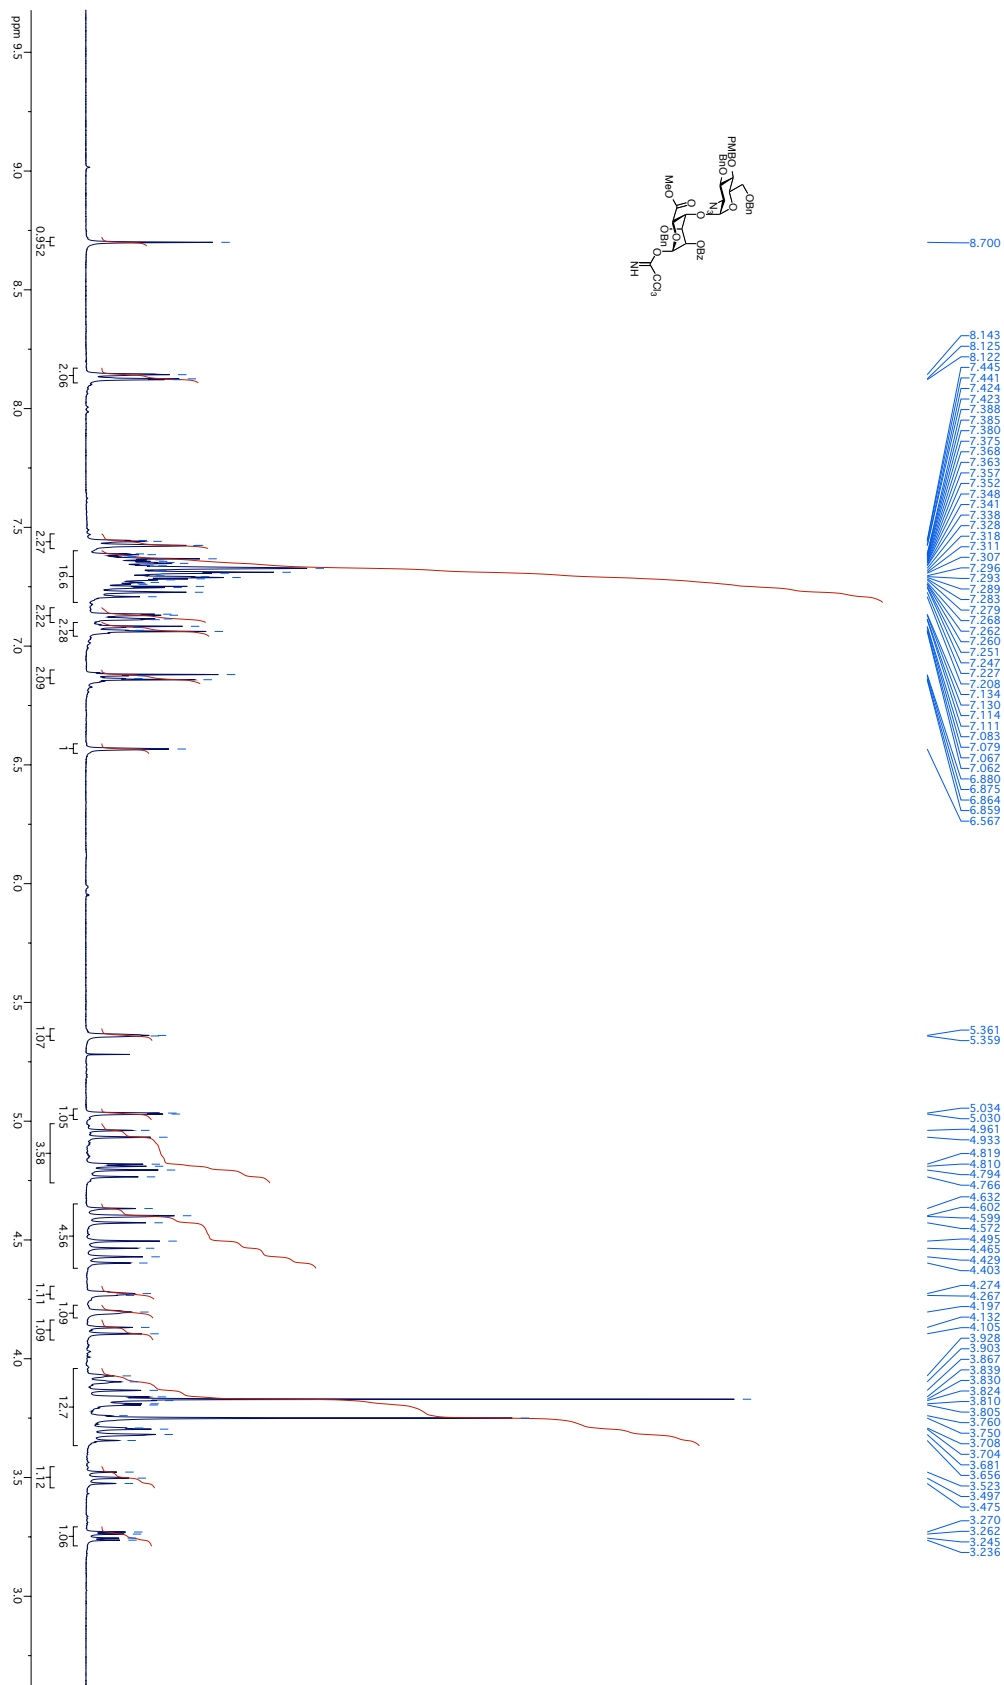

Supplementary Figure S5.  $^1\text{H NMR}$  (400 MHz;  $\text{CDCl}_3$ ) spectrum for  $\alpha$ -4.

SU97A

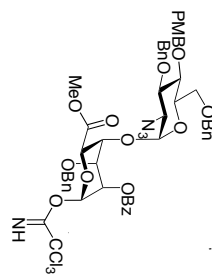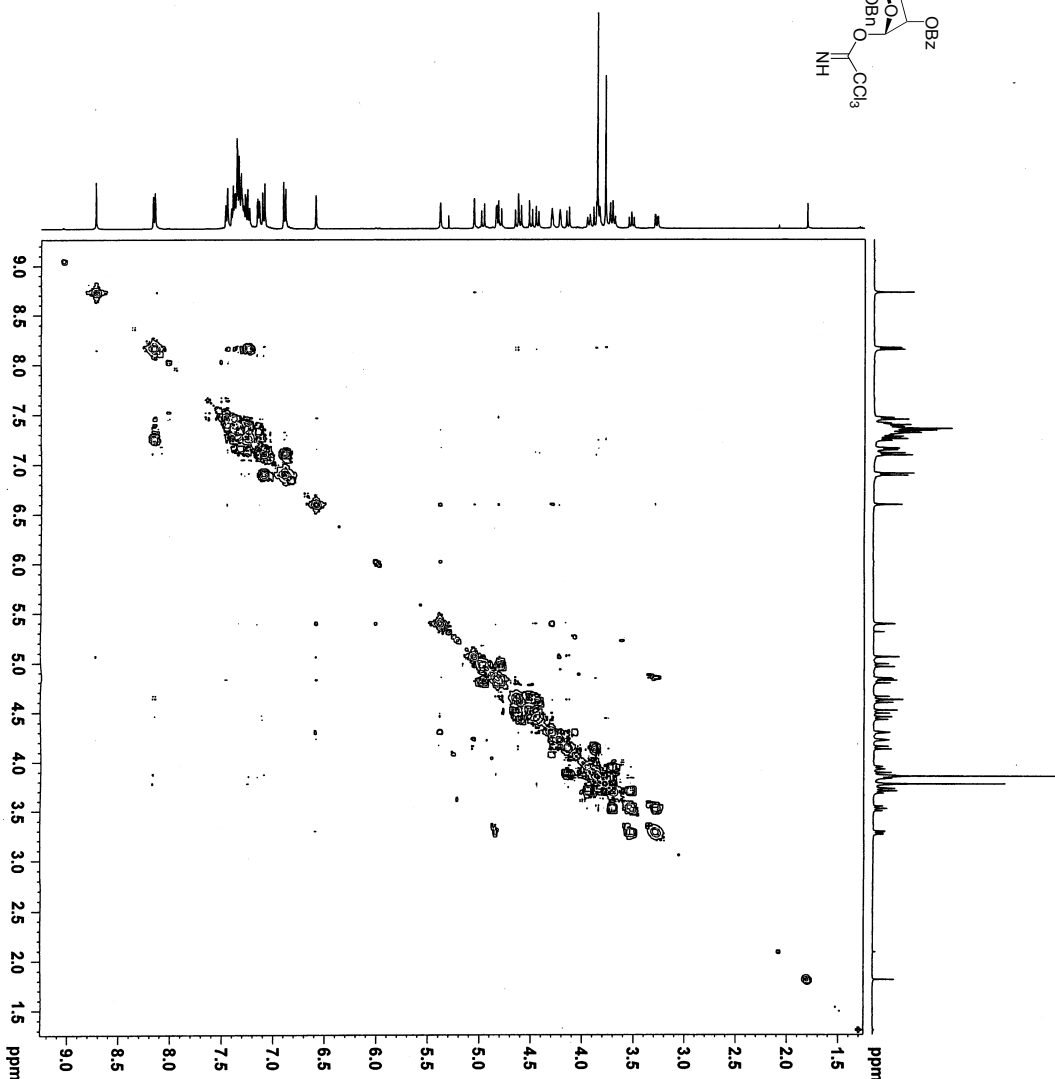

Current Data Parameters  
 EXPNO 2  
 PROCNO 1  
 F2 - Acquisition Parameters  
 Date\_ 20120617  
 Time 14:41  
 INSTRUM spect  
 PULPROG zgpg30  
 TD 65536  
 NS 2048  
 DS 8  
 SWH 3205.128 Hz  
 FWHM 135.520 Hz  
 AQ 0.319280 sec  
 SFO1 400.1321048 MHz  
 RG 1024  
 INEPT 25.4  
 DE 156.000  
 TE 300.0 K  
 D1 0.00000300 sec  
 D13 0.00000400 sec  
 D15 0.00020000 sec  
 INO 0.00031200 sec  
 CHANNEL f1  
 NUC1 1H  
 P1 10.00 usec  
 PL1 -0.10 dB  
 SFO1 400.1321048 MHz  
 GRAB1 GRAB1 CHANNEL  
 GRAB2 SINE 100  
 GP42 10.00 usec  
 P16 1000.00 usec  
 F1 - Acquisition Parameters  
 MD 128  
 TD1 400.1321048 MHz  
 SFO1 400.1321048 MHz  
 SF 25.4 usec  
 SW 8.010 ppm  
 FWHM 0F  
 F2 - Processing Parameters  
 SI 1024  
 SF 400.1300000 MHz  
 SE 3196  
 SSB 0.00 Hz  
 LB 0  
 GB 1.40  
 PC  
 F1 - Processing Parameters  
 SI 1024  
 SF 400.1300000 MHz  
 SE 3196  
 SSB 0.00 Hz  
 CB 0

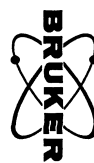

Supplementary Figure S6. COSY NMR spectrum for  $\alpha$ -4.



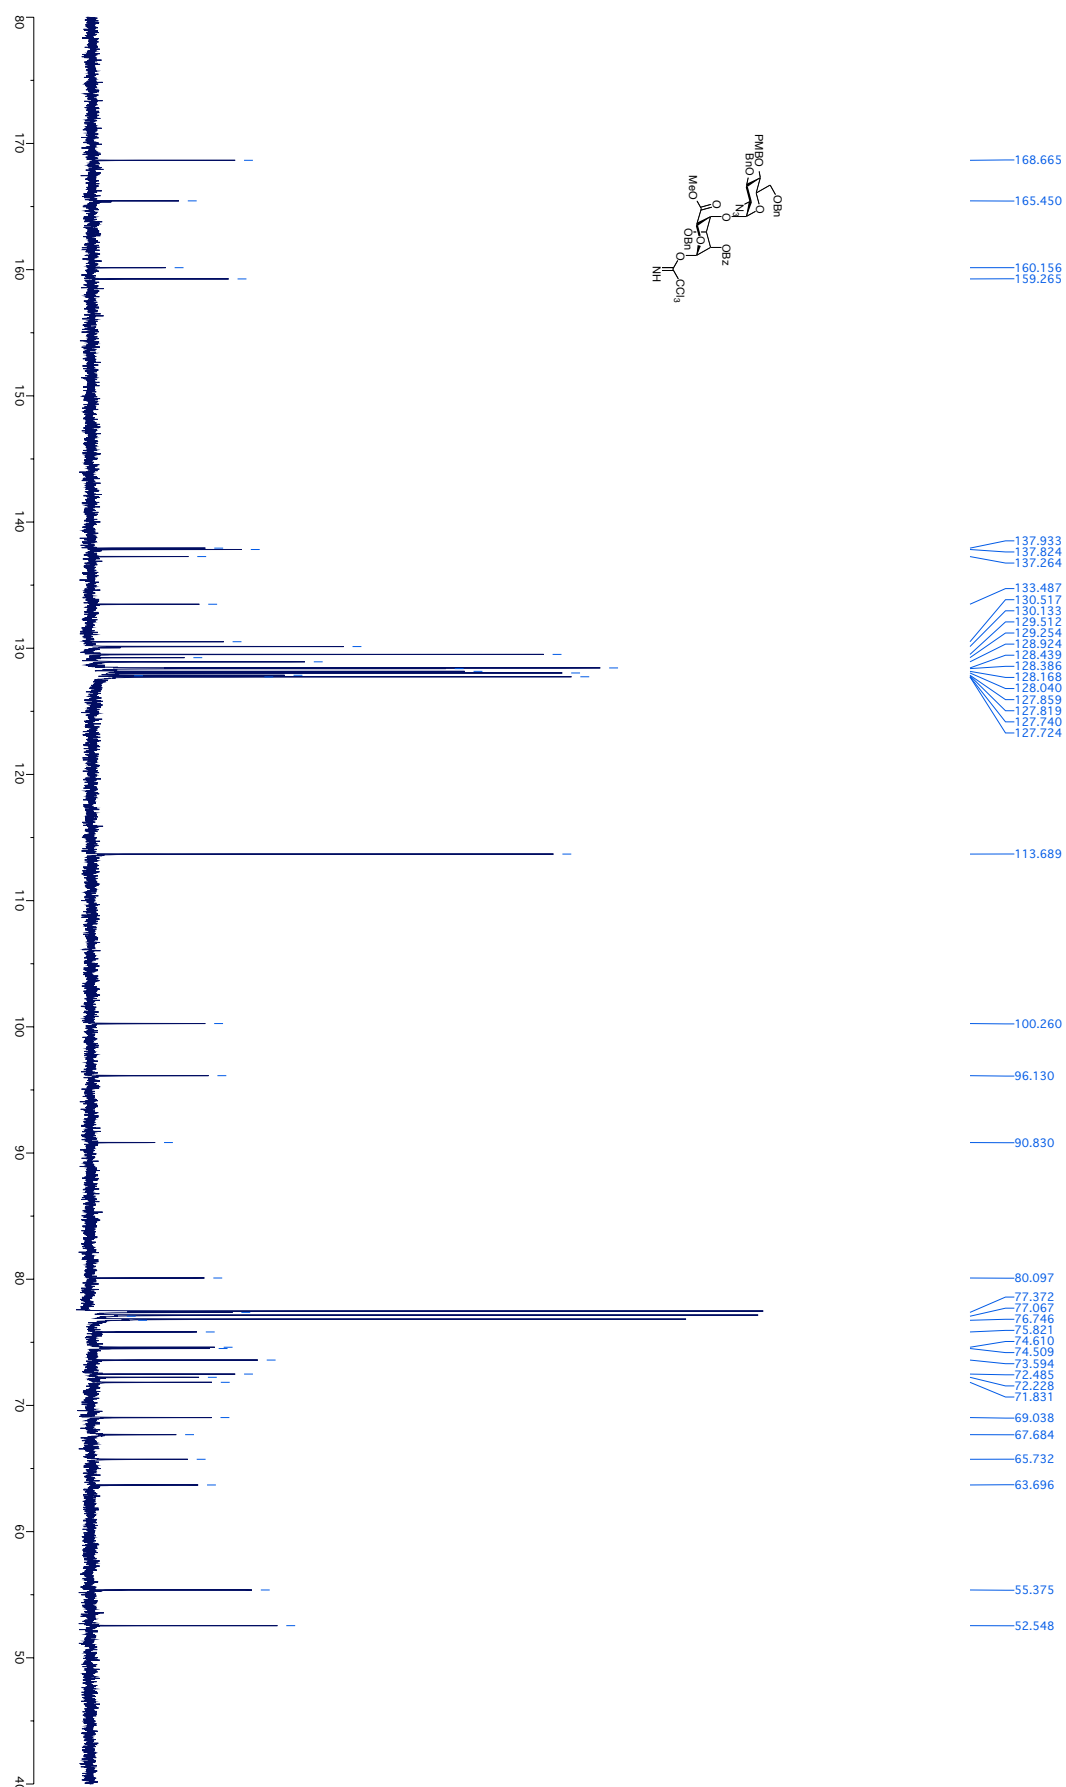

Supplementary Figure S8.  $^{13}\text{C}$  NMR (100 MHz;  $\text{CDCl}_3$ ) spectrum for  $\alpha$ -4.



SU997B

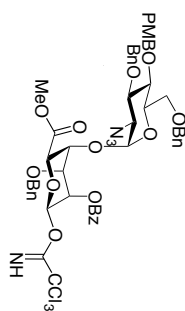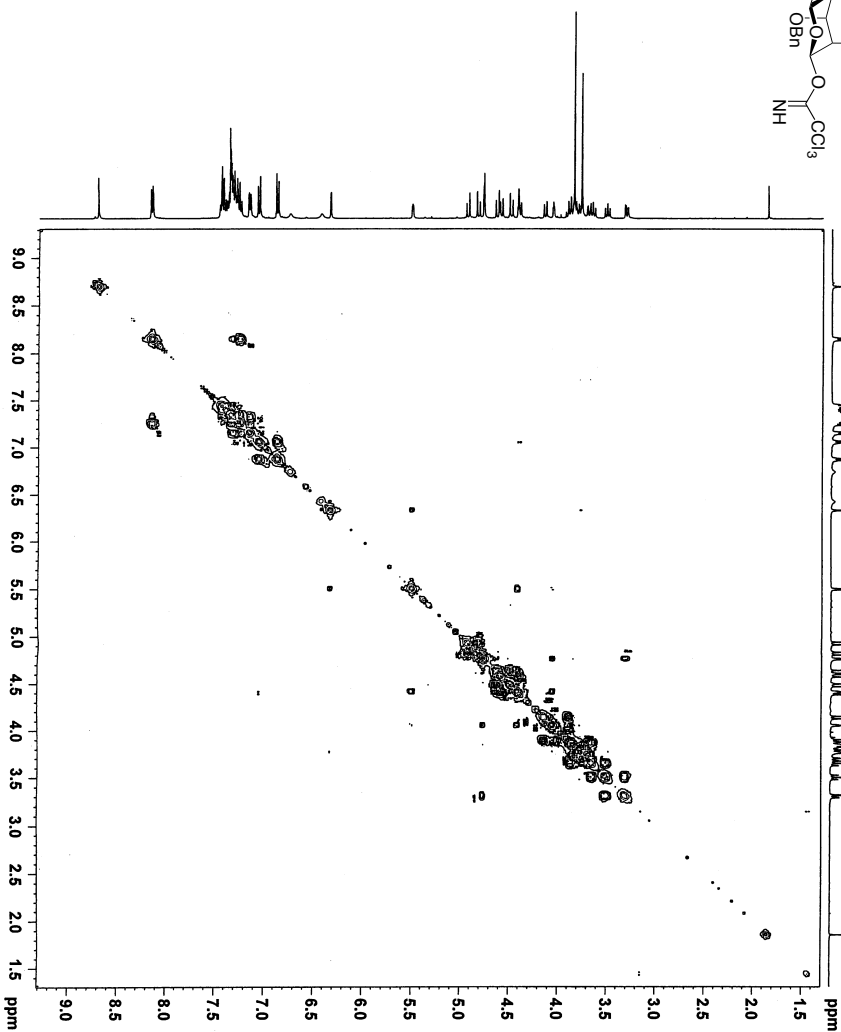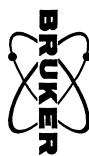

Current Data Parameters  
 NAME Jun17-2012-sandf  
 EXPNO 31  
 PROCNO 1  
 F2 - Acquisition Parameters  
 Date\_ 20111121  
 Time 20:15:21  
 INSTRUM 5 mm Nal spect  
 PULPROG zgpg30  
 TD 2048  
 FIDRES 0.0922000  
 SOLVENT CDCl3  
 NS 8  
 DS 4  
 SFR 1205.128 Hz  
 AQ 0.01666667 sec  
 HZ 0.319380 sec  
 RG 26.5  
 DE 15.00 usec  
 TE 300.0 K  
 D1 1.35000000 sec  
 DI 0.00000000 sec  
 D16 0.00020000 sec  
 D10 0.19025000 sec  
 CHANNEL F1  
 NUC1 13C  
 P0 10.00 usec  
 P1 10.00 usec  
 SFO1 400.132133 MHz  
 GRADIENT CHANNELS  
 GRNAM1 ZONE1  
 GRNAM2 SINE100  
 STW1 10.00 usec  
 STW2 10.00 usec  
 P16 1000.00 usec  
 F1 - Acquisition parameters  
 MD 128  
 TD 409.1321 MHz  
 SFOBS 204.0641 MHz  
 SF 8.010 Ppm  
 FWHM 0.9  
 F2 - Processing parameters  
 SI 400.1321 MHz  
 SF 400.1321 MHz  
 MDW 0.00 Hz  
 SSB 0.00 Hz  
 LB 1.40  
 PC 1.40  
 F1 - Processing parameters  
 SI 1024  
 MC2 400.1321000 MHz  
 MDW 0.00 Hz  
 SSB 0.00 Hz  
 LB 0.00 Hz  
 GB 0.00 Hz

Supplementary Figure S10. COSY NMR spectrum for  $\beta$ -4





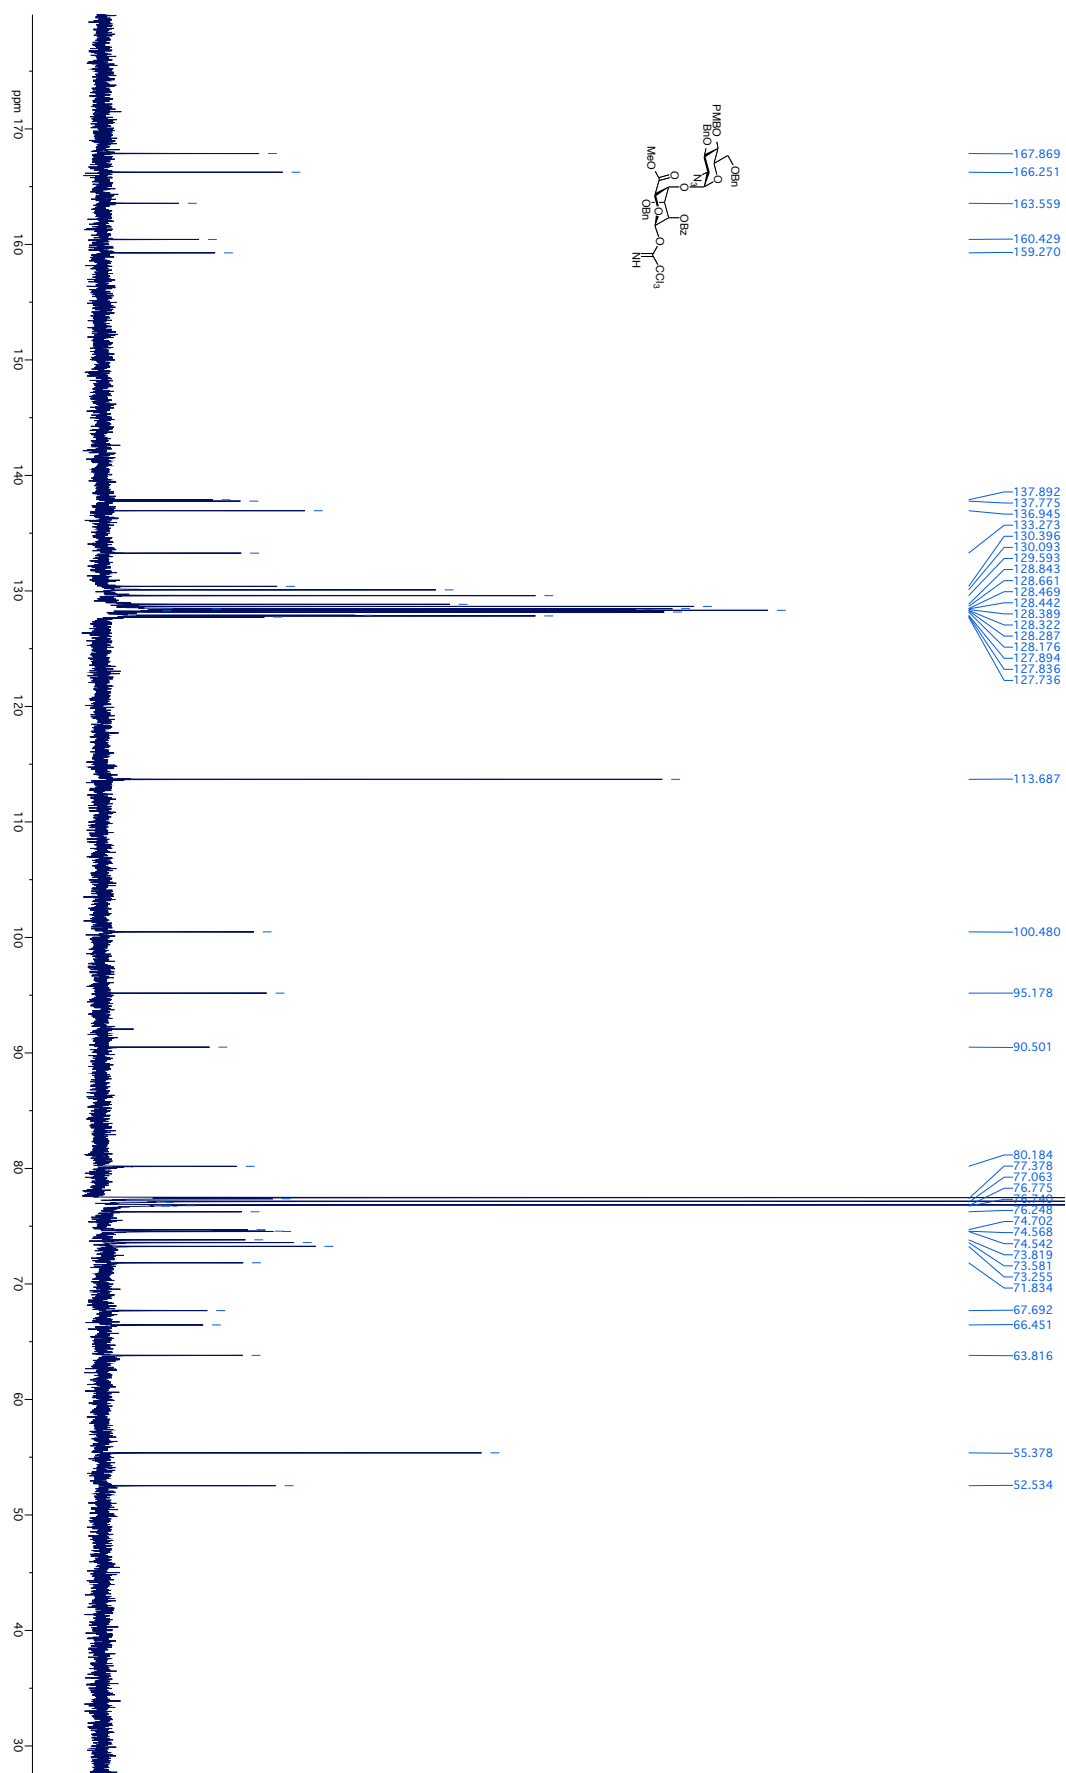

Supplementary Figure S12.  $^{13}\text{C}$  NMR (100 MHz;  $\text{CDCl}_3$ ) spectrum for  $\beta$ -4

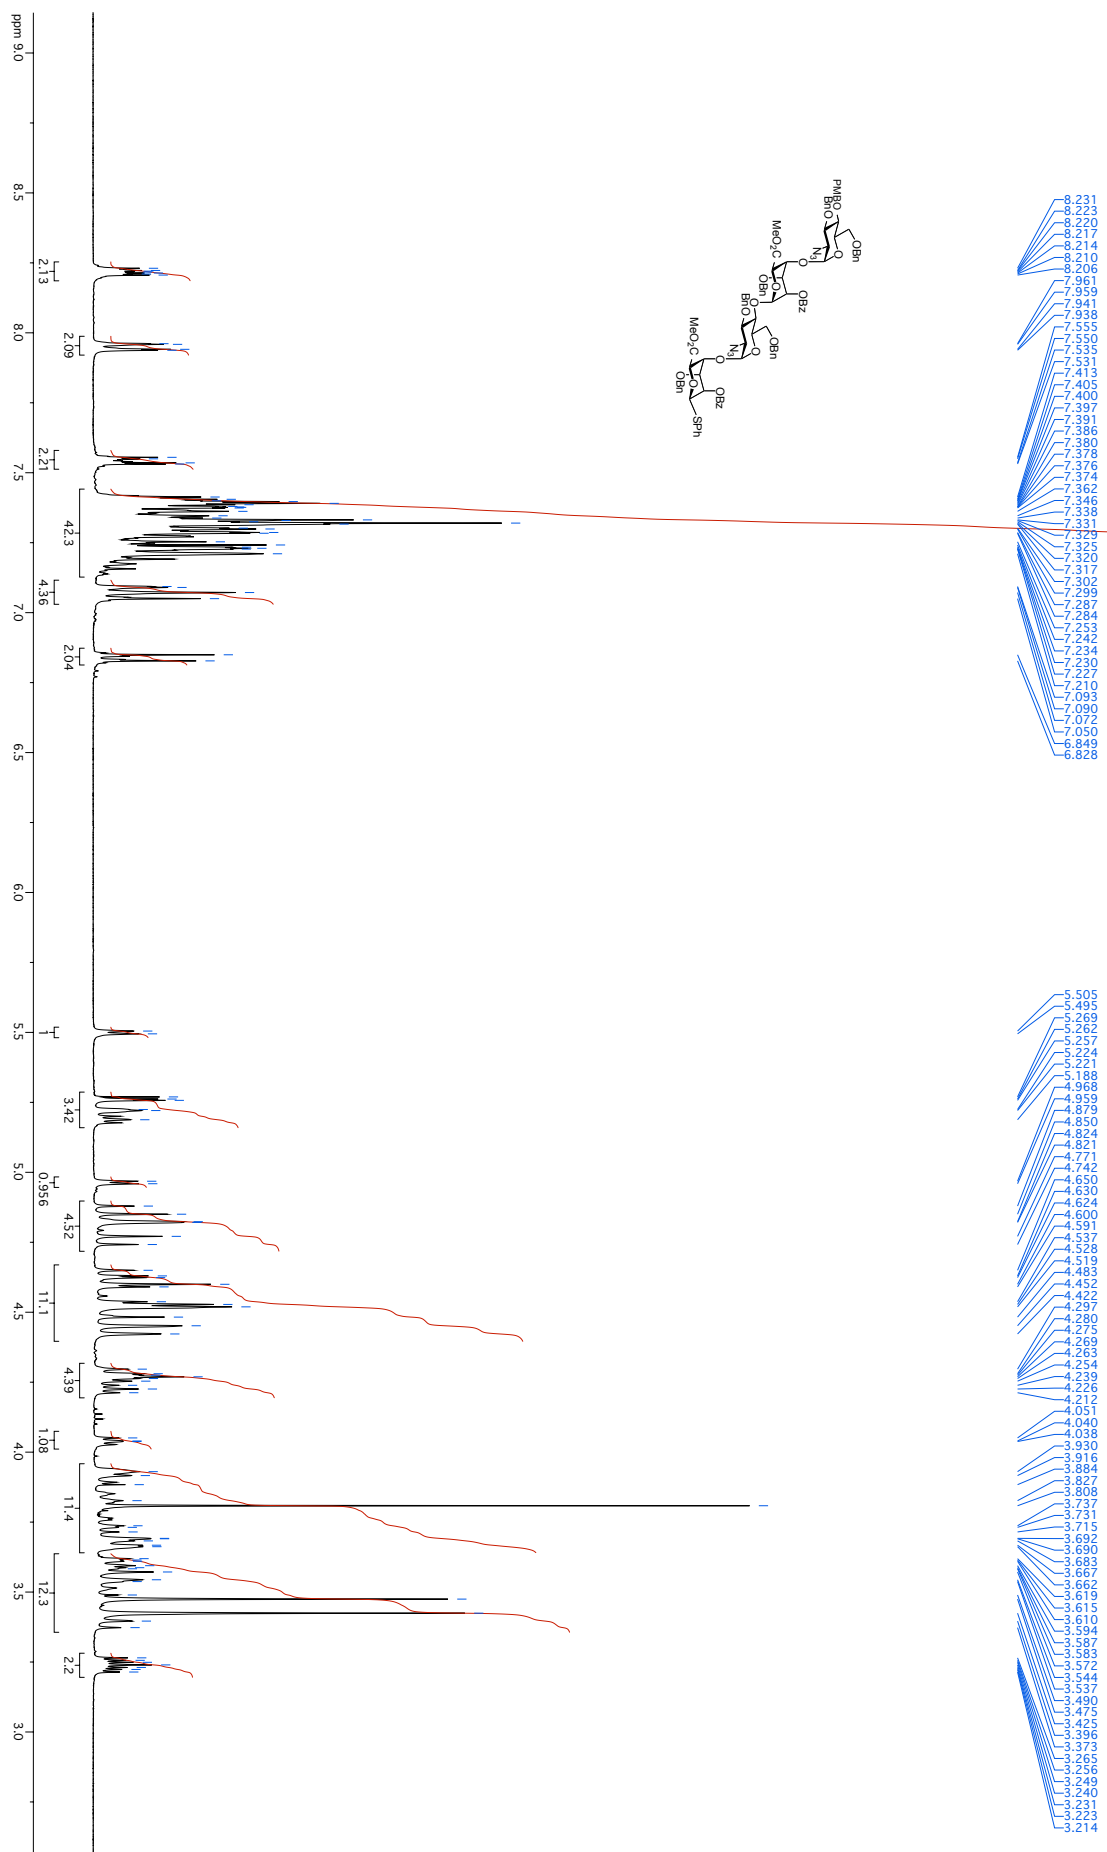

Supplementary Figure S13.  $^1\text{H}$  NMR (400 MHz;  $\text{CDCl}_3$ ) spectrum for  $\beta$ -6

SU998

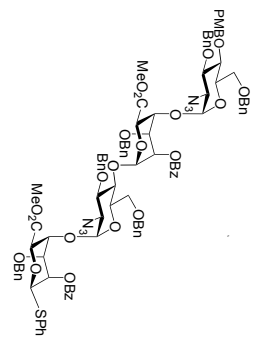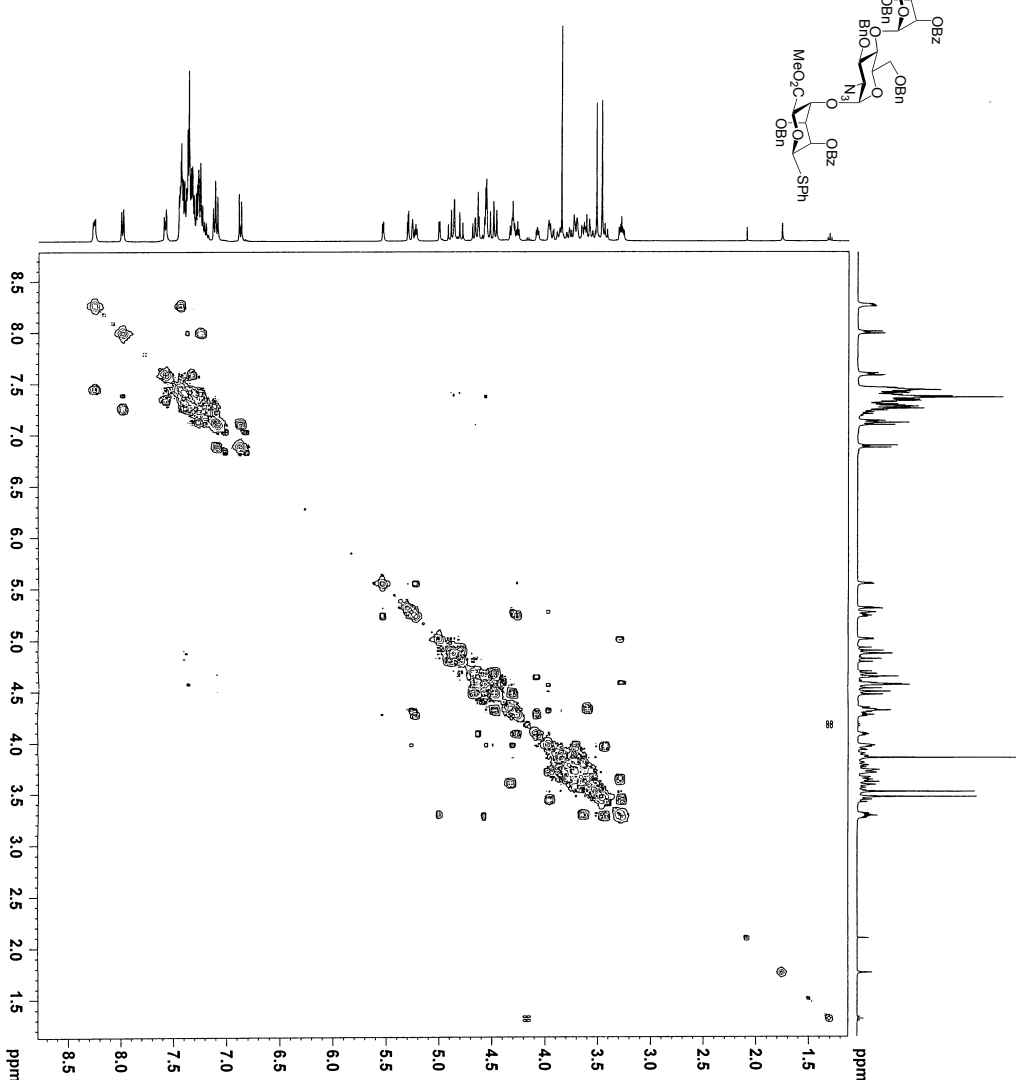

```

Current Data Parameters
NAME      Jan15-2009-DG
EXPNO    1
PROCNO   1
F2 - Acquisition Parameters
File      20090115
Time      23.51
INSTRUM  spect
PROBHD   5 mm NML
PULPROG  zgpg30
TD        65536
SOLVENT  CDCl3
NS        8
DS        8
SWH       3063.726 Hz
AQ        0.3347836 sec
RG         22.6
WDW        163.200 usec
SSB         0.00000000 sec
GB          0.00000000 sec
PC          233.2 K
TE          0.00000000 sec
D16        0.00020000 sec
D18        0.00026400 sec
===== CHANNEL f1 =====
NUC1       1H
P1         10.00 usec
PL         -0.10 dB
SFO1       400.1319839 MHz
===== GRADIENT CHANNEL =====
GNUM1     1
SINE      100
GAMMA2    0.00 %
GR22      10.00 %
P16       1000.00 usec
F1 - Acquisition Parameters
NUC1       1H
P1         10.00 usec
PL         -0.10 dB
SFO1       400.1319839 MHz
===== CHANNEL f2 =====
GNUM2     1
SINE      100
GAMMA2    0.00 %
GR22      10.00 %
P16       1000.00 usec
F2 - Processing parameters
SI         1024
SF         400.1300000 MHz
WDW        0.00 Hz
SSB         0.00 Hz
GB          0.00 Hz
PC          1.40
F1 - Processing parameters
SI         1024
SF         400.1300000 MHz
WDW        0.00 Hz
SSB         0.00 Hz
GB          0.00 Hz
  
```

Supplementary Figure S14. COSY NMR spectrum for  $\beta$ -6

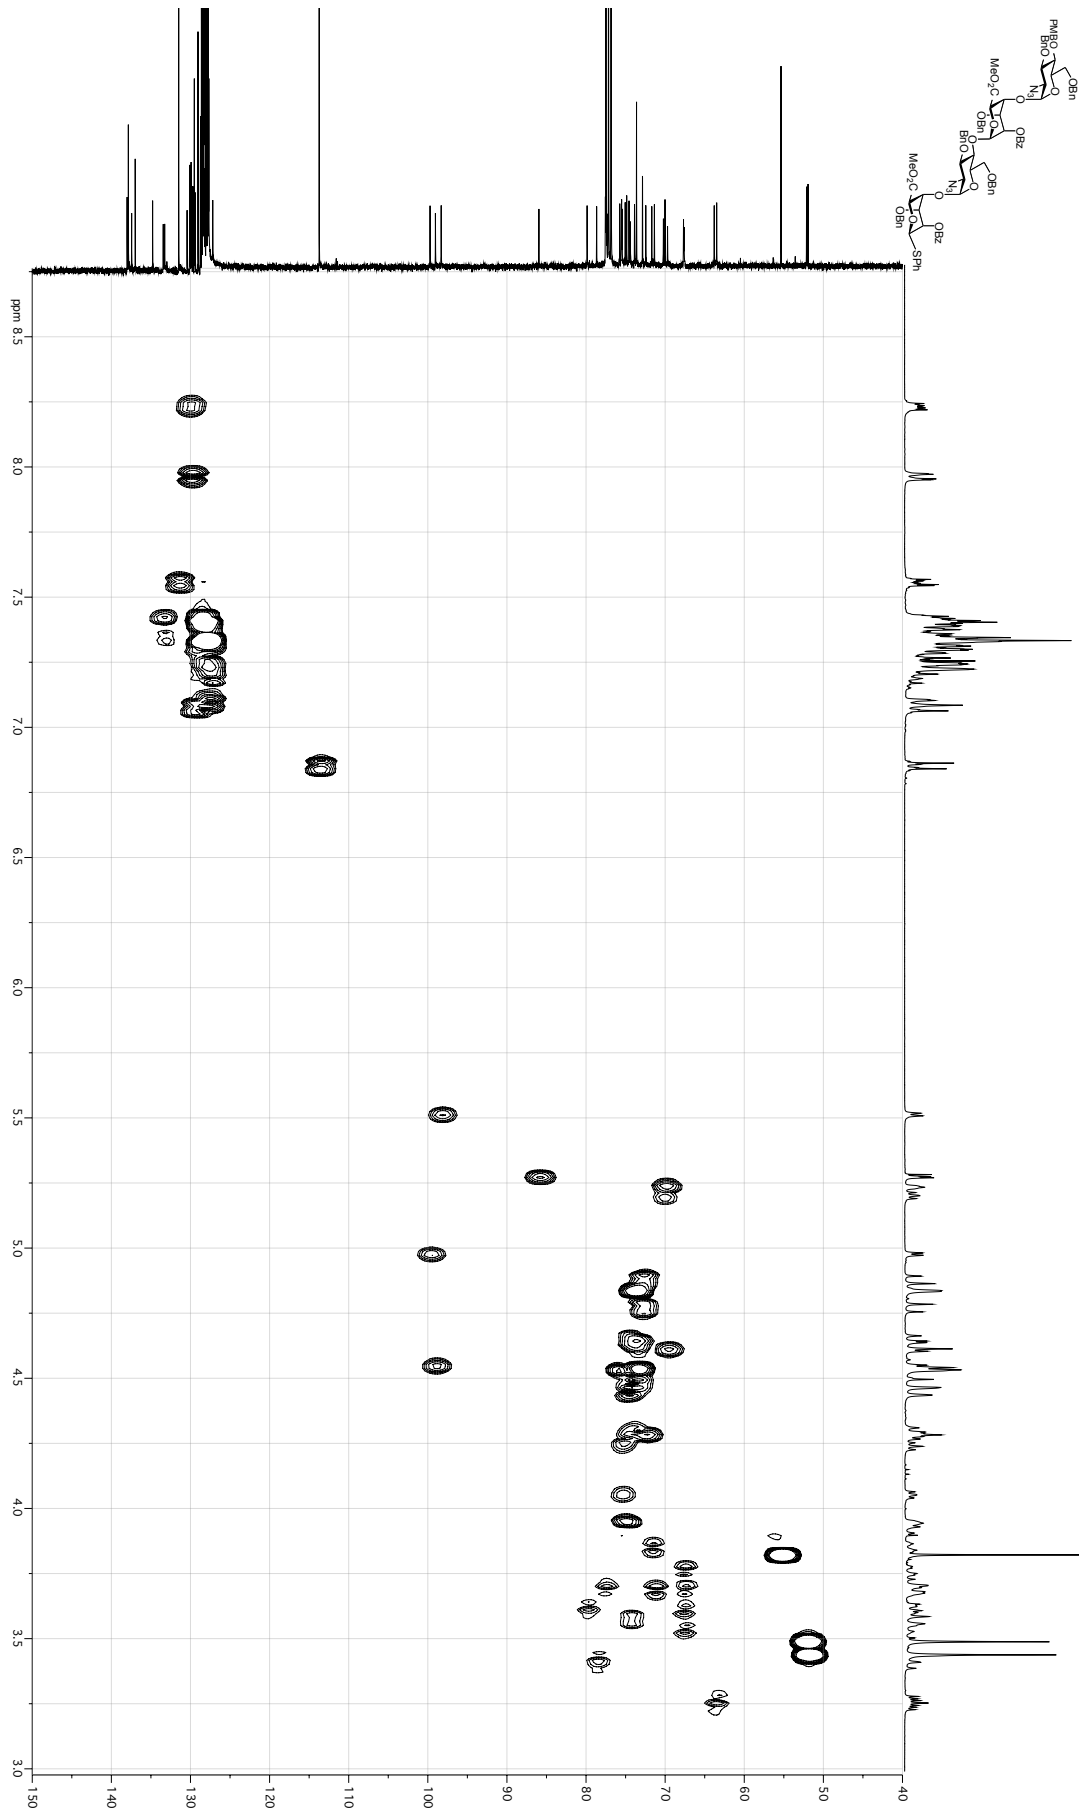

Supplementary Figure S15. HMQC NMR spectrum for  $\beta$ -6

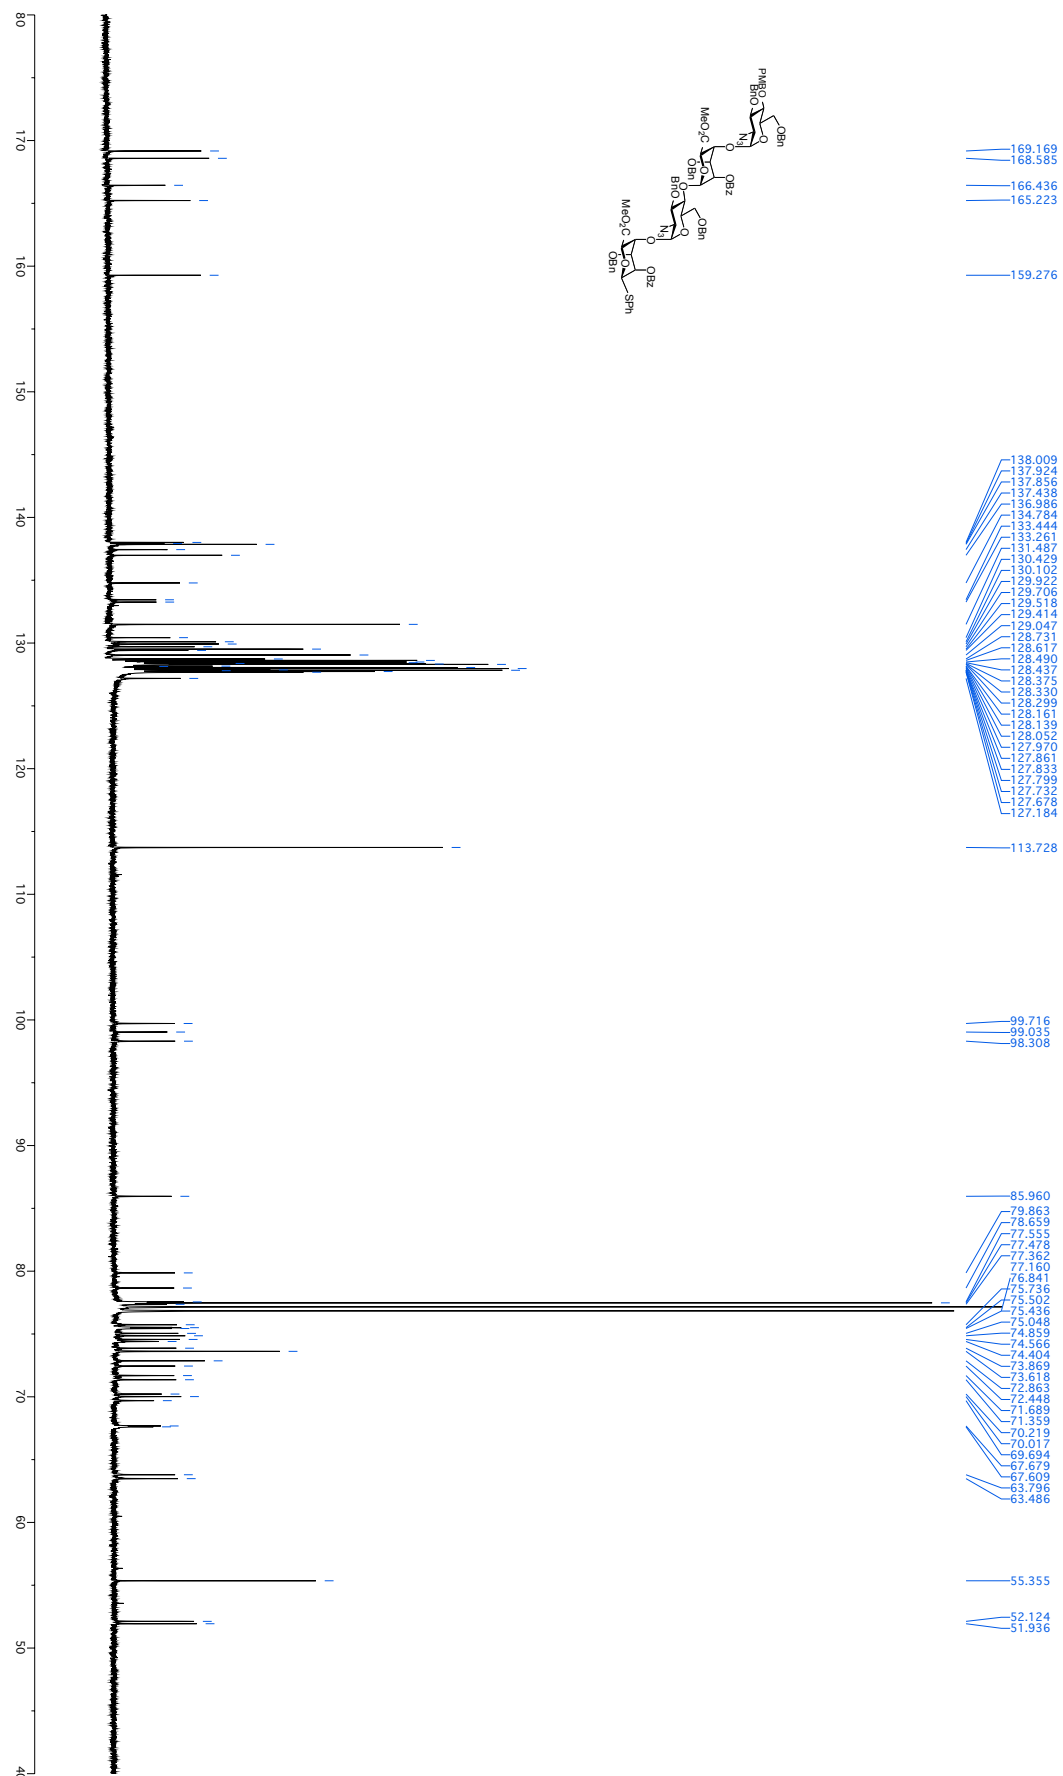

<sup>1</sup> Supplementary Figure S16. <sup>13</sup>C NMR (100 MHz; CDCl<sub>3</sub>) spectrum for  $\beta$ -6

MANGAR136-OV-HNESP #92-104 RT: 1.98-2.32 AV: 13 SM: 7G NL: 6.72E6  
T: FTMS + p NSI Full ms [200.00-4000.00]

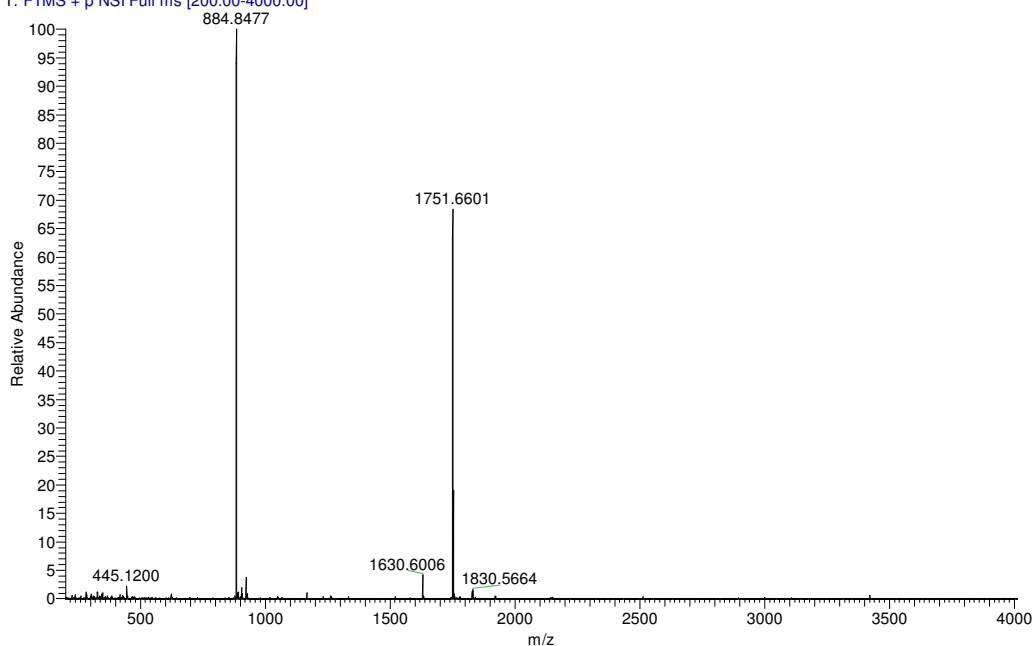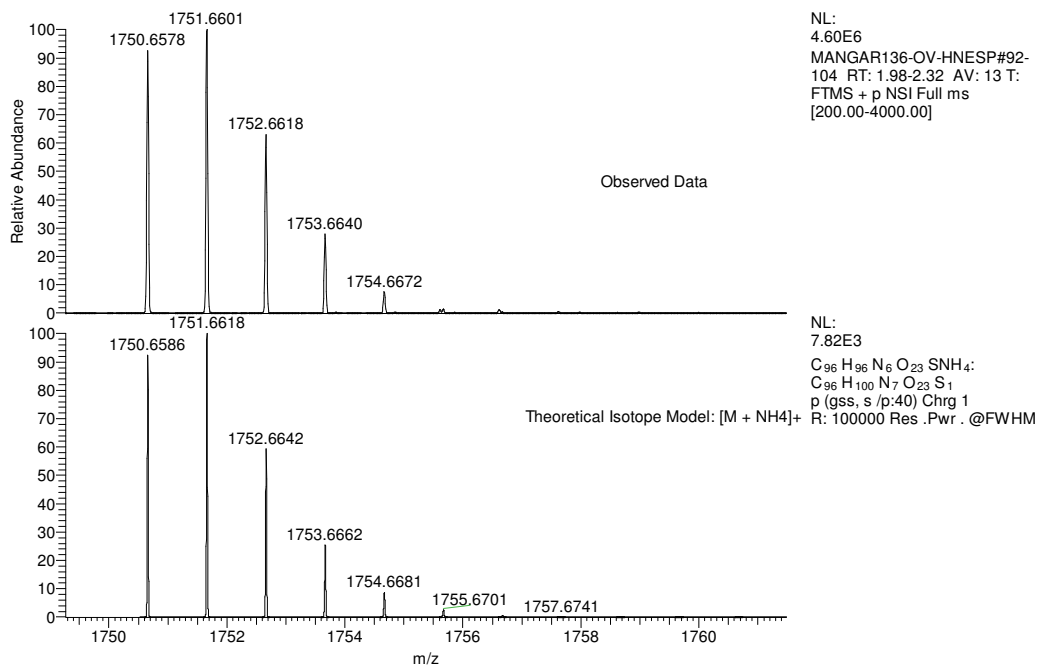

Supplementary Figure S17. HFT MS spectrum for  $\beta$ -6

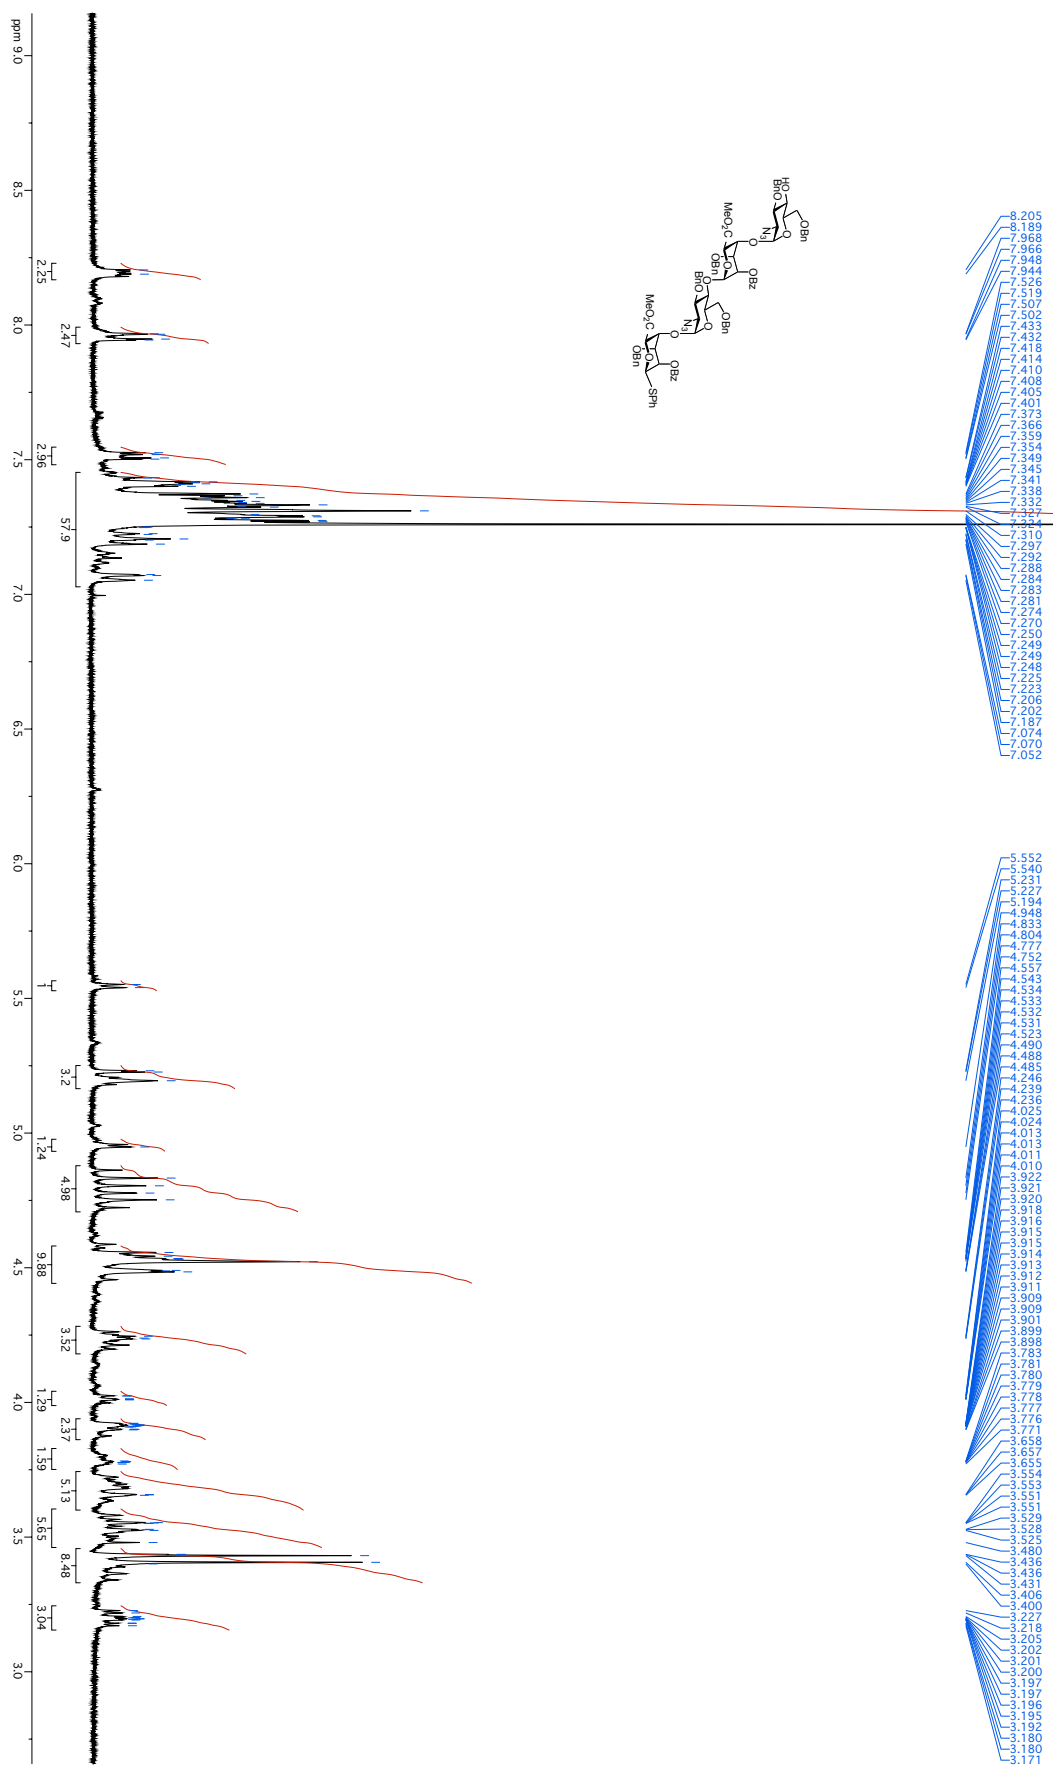

Supplementary Figure S18.  $^1\text{H}$  (400 MHz,  $\text{CDCl}_3$ ) NMR spectrum for  $\beta$ -7

SU1246

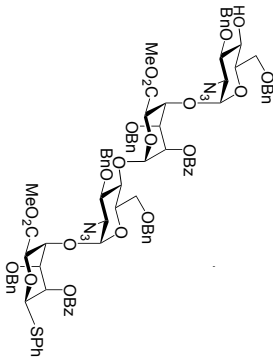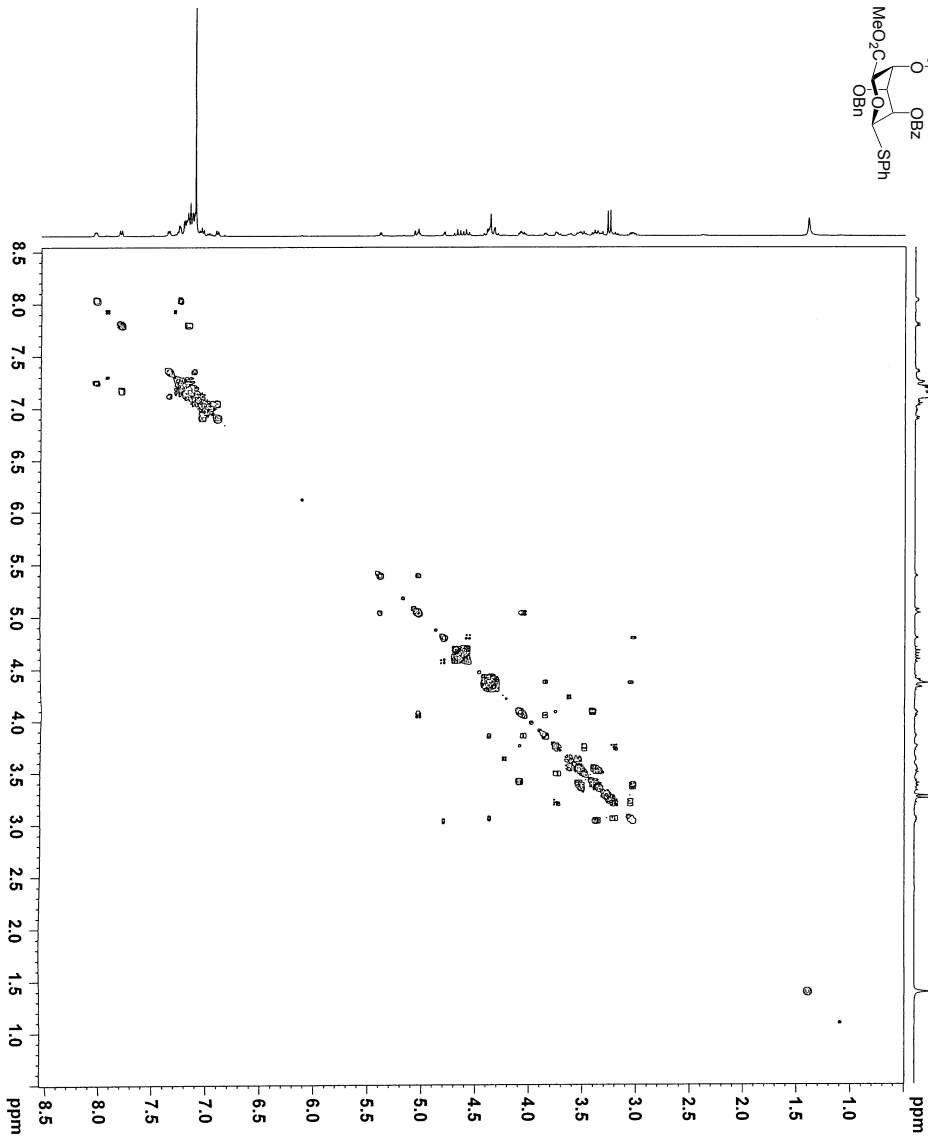

Current Data Parameters  
 Name SU1246-2012-941  
 EXPNO 41  
 PROCNO 1  
 F2 - Acquisition Parameters  
 Date\_ 20120328  
 Time 12.08  
 INSTRUM spect  
 F2PROB 5 mm NMR  
 PULPROG zgpg30  
 TD 65536  
 SFO1 400.1318809 MHz  
 SOLVENT CDCl3  
 NS 4  
 DS 4  
 SWH 3221.649 Hz  
 FIDRES 1.573071 Hz  
 AQ 0.3178926 sec  
 RG 155.200  
 DW 155.200 usec  
 DE 6.00 usec  
 TE 300.2 K  
 TR 0.0002000 sec  
 D1 1.36134502 sec  
 d13 0.00000400 sec  
 D16 0.00020000 sec  
 INO 0.00031040 sec  
 ===== CHANNEL f1 =====  
 NUC1 1H  
 P1 10.00 usec  
 PL1 0.00 dB  
 F1 400.1318809 MHz  
 SFO1 400.1318809 MHz  
 ===== GRADIENT CHANNEL =====  
 GPCP1 SINE 10.00 usec  
 GPCP2 SINE 10.00 usec  
 GPCP3 SINE 10.00 usec  
 P15 1000.00 usec  
 F1 - Acquisition parameters  
 MD 128  
 SI 128  
 SF01 400.1319 MHz  
 FIDRES 25.169136 Hz  
 SM 8.051 ppm  
 RMK006 Q1  
 F2 - Processing parameters  
 SI 1024  
 SF 400.1300727 MHz  
 MDW SINE  
 SSB 0  
 LB 0.00 Hz  
 GB 0  
 TC 1.40  
 F1 - Processing parameters  
 SI 1024  
 SF 400.1300727 MHz  
 MDW SINE  
 SSB 0  
 LB 0.00 Hz  
 GB 0  
 TC 1.40

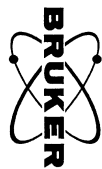

Supplementary Figure S19. COSY NMR spectrum for  $\beta$ -7



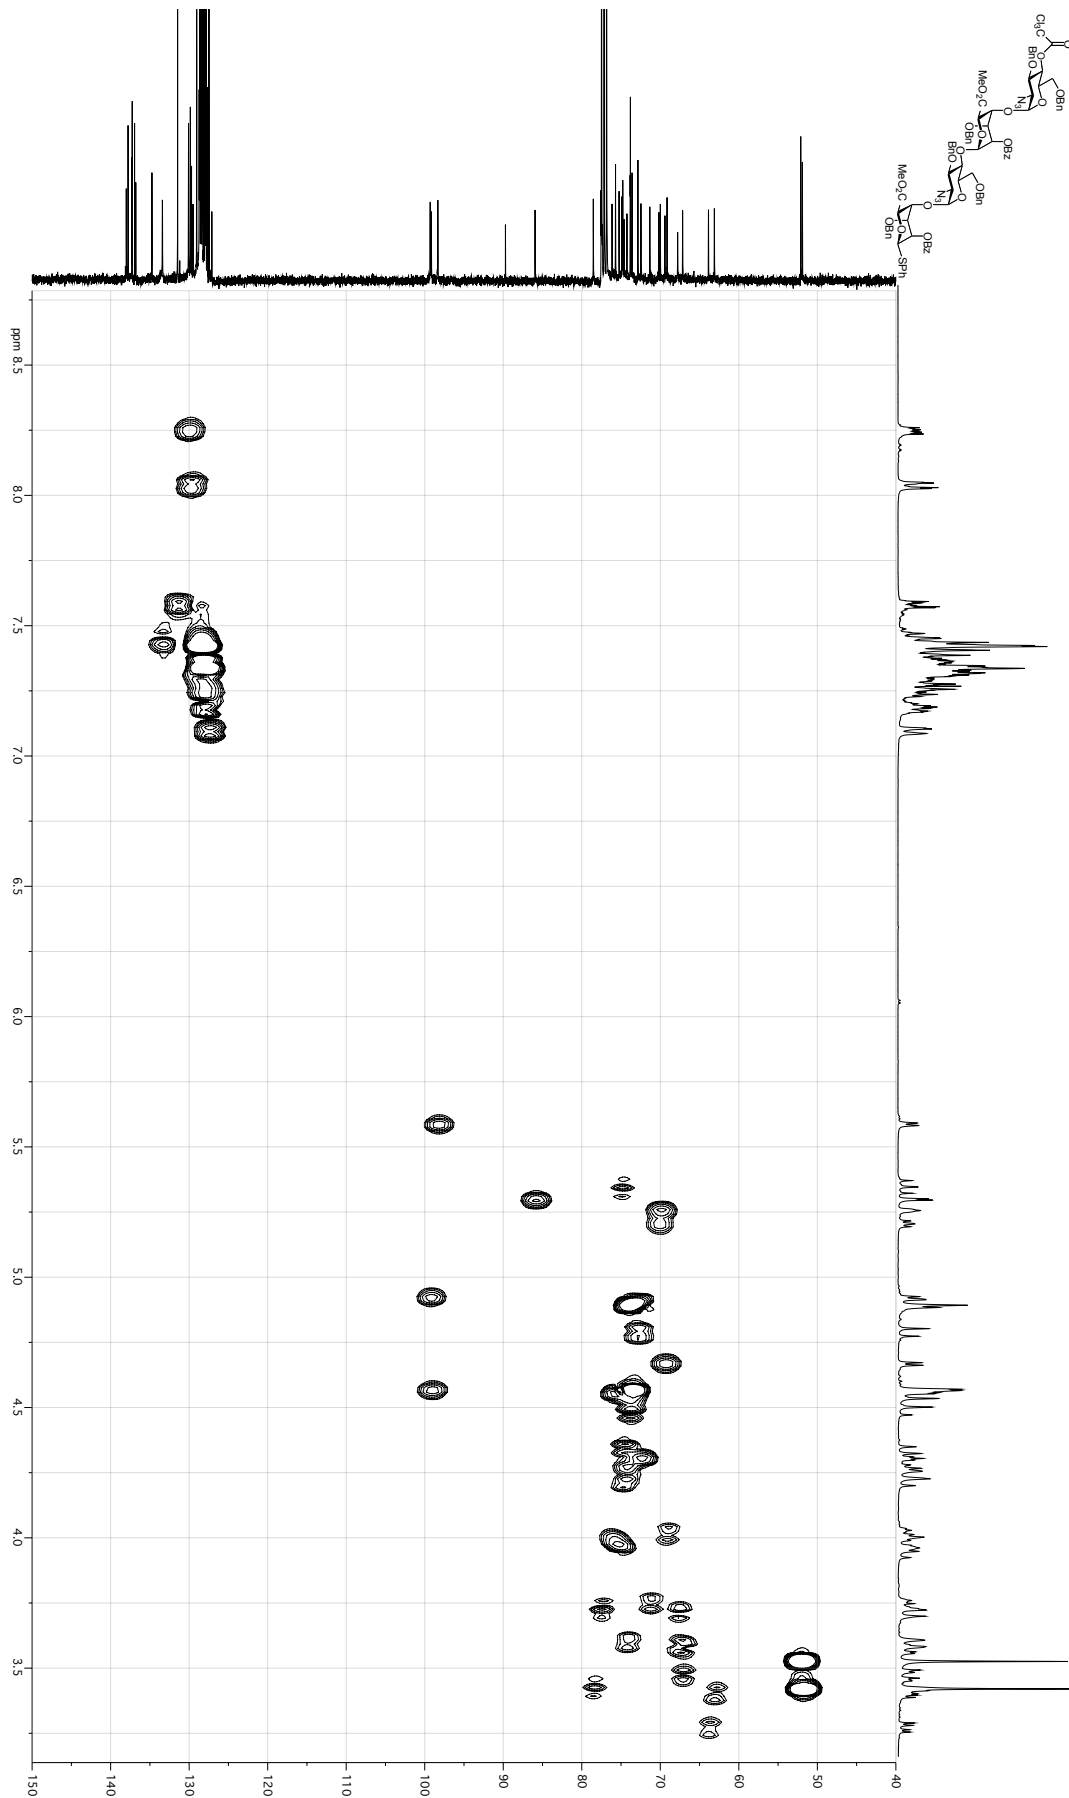

Supplementary Figure S20. HMBC NMR spectrum for  $\beta$ -7

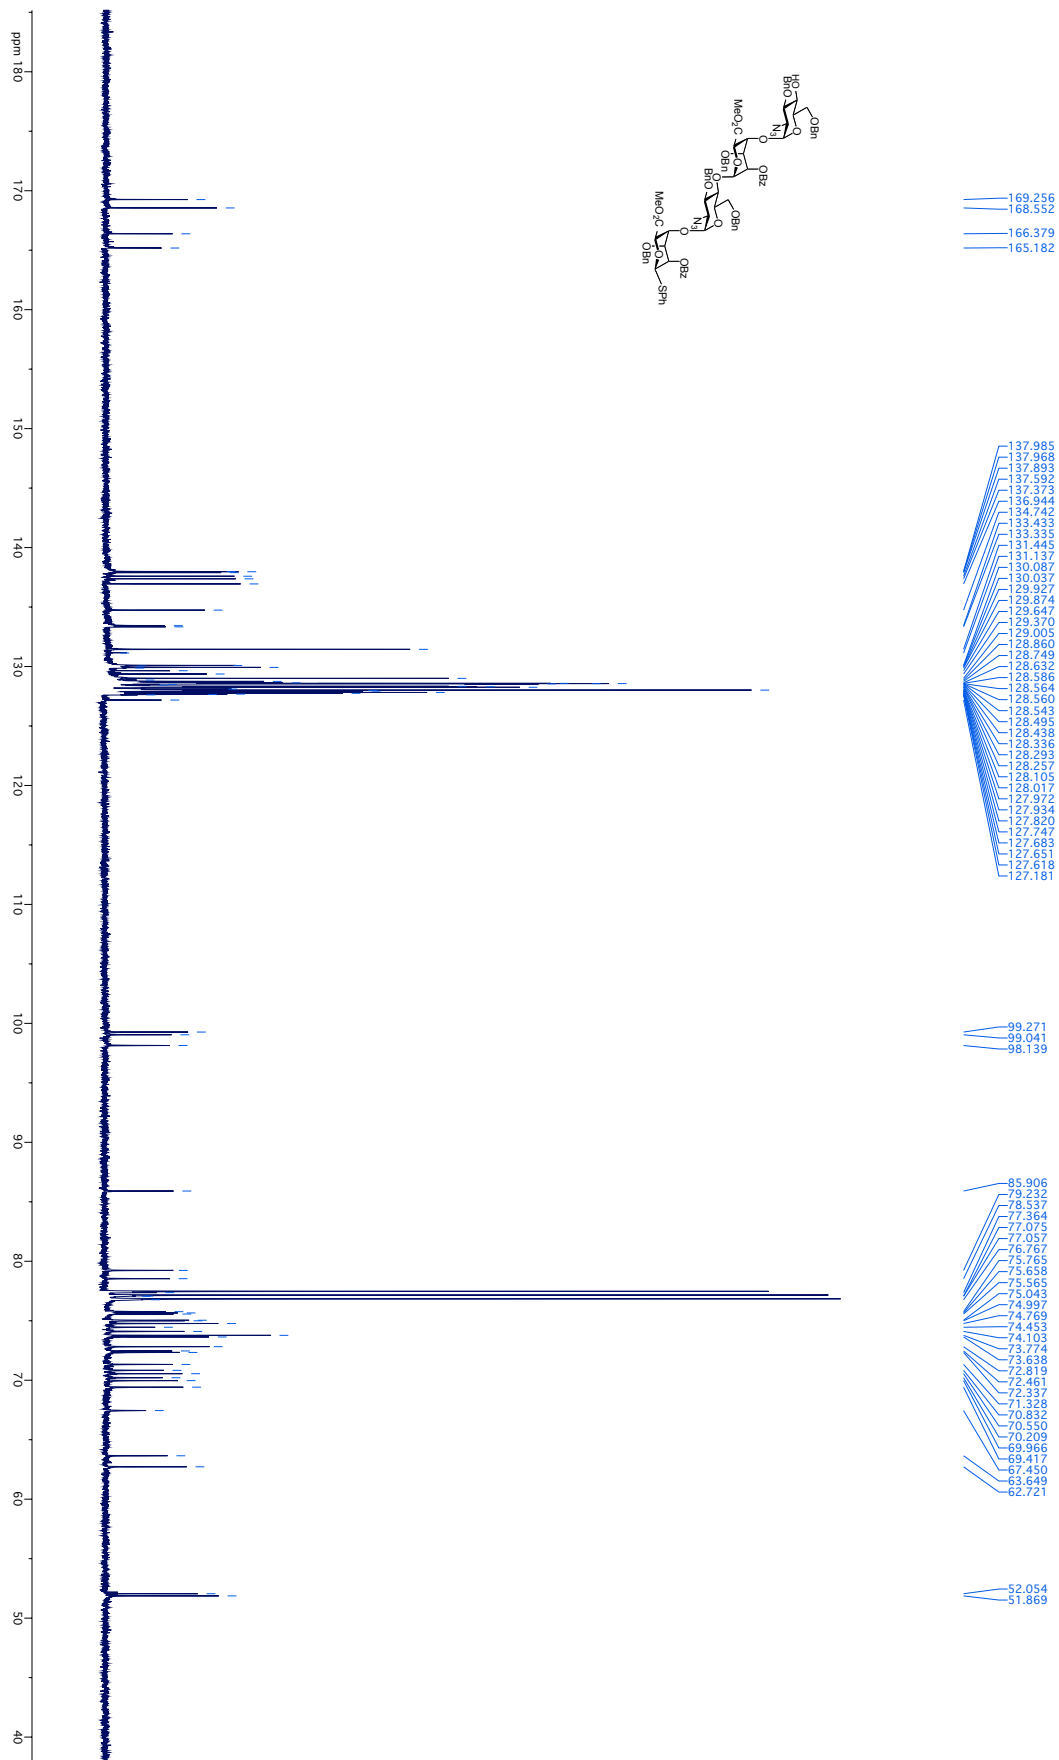

Supplementary Figure S21.  $H^{13}C$  NMR (100 MHz;  $CDCl_3$ ) spectrum for  $\beta$ -7

MANGAR137-OV-HNESP #92-102 RT: 2.05-2.34 AV: 11 SM: 7G NL: 3.16E6  
T: FTMS + p NSI Full ms [200.00-4000.00]

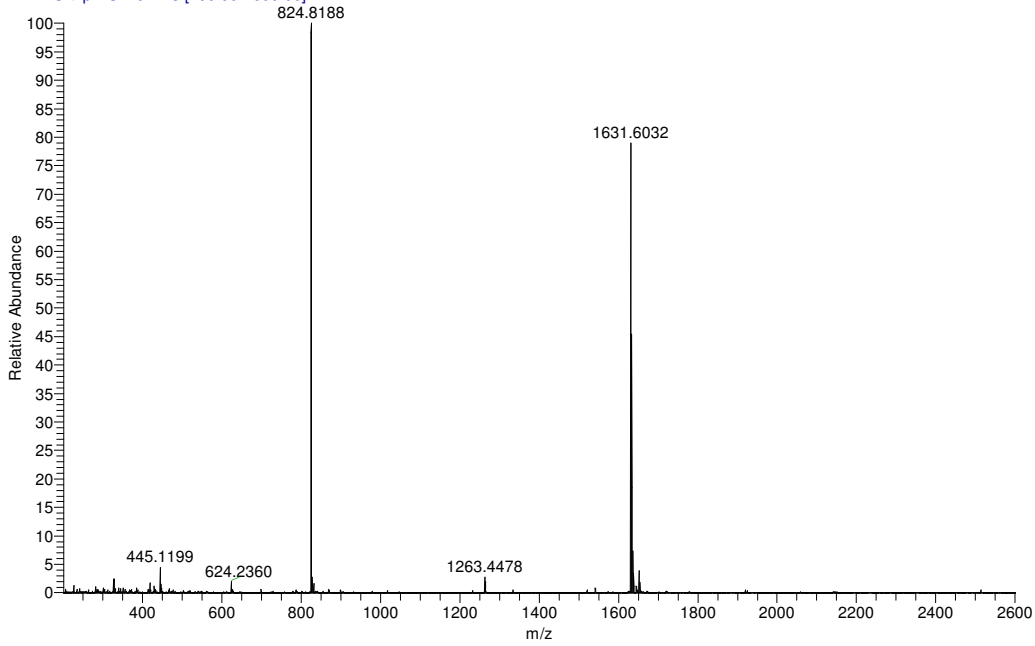

SM: 7G

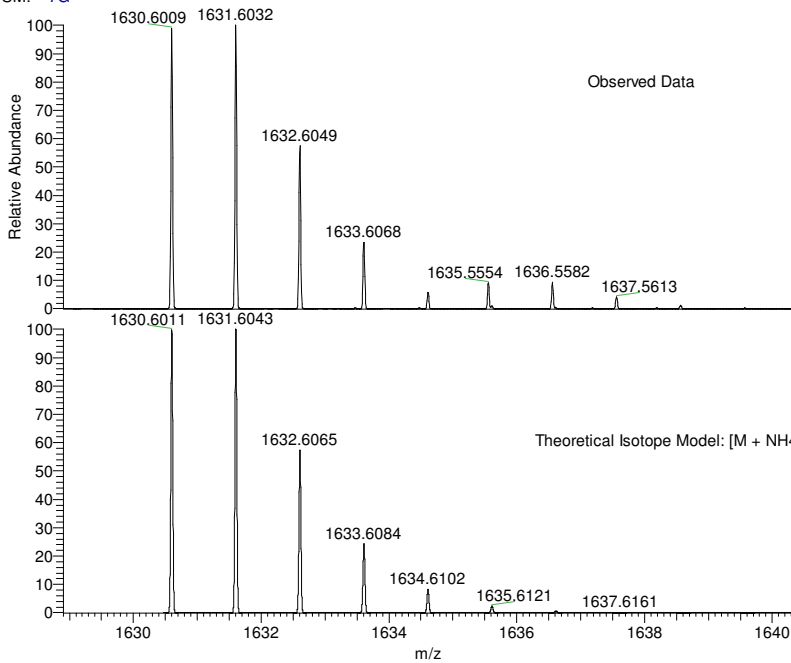

NL:  
2.49E6  
MANGAR137-OV-HNESP#92-  
102 RT: 2.05-2.34 AV: 11 T:  
FTMS + p NSI Full ms  
[200.00-4000.00]

NL:  
7.91E3  
C<sub>88</sub>H<sub>88</sub>N<sub>6</sub>O<sub>22</sub>SNH<sub>4</sub>:  
C<sub>88</sub>H<sub>92</sub>N<sub>7</sub>O<sub>22</sub>S<sub>1</sub>  
p (gss, s /p:40) Chrg 1  
R: 50000 Res .Pwr . @FWHM

Supplementary Figure S22. HFT MS spectrum for  $\beta$ -7.

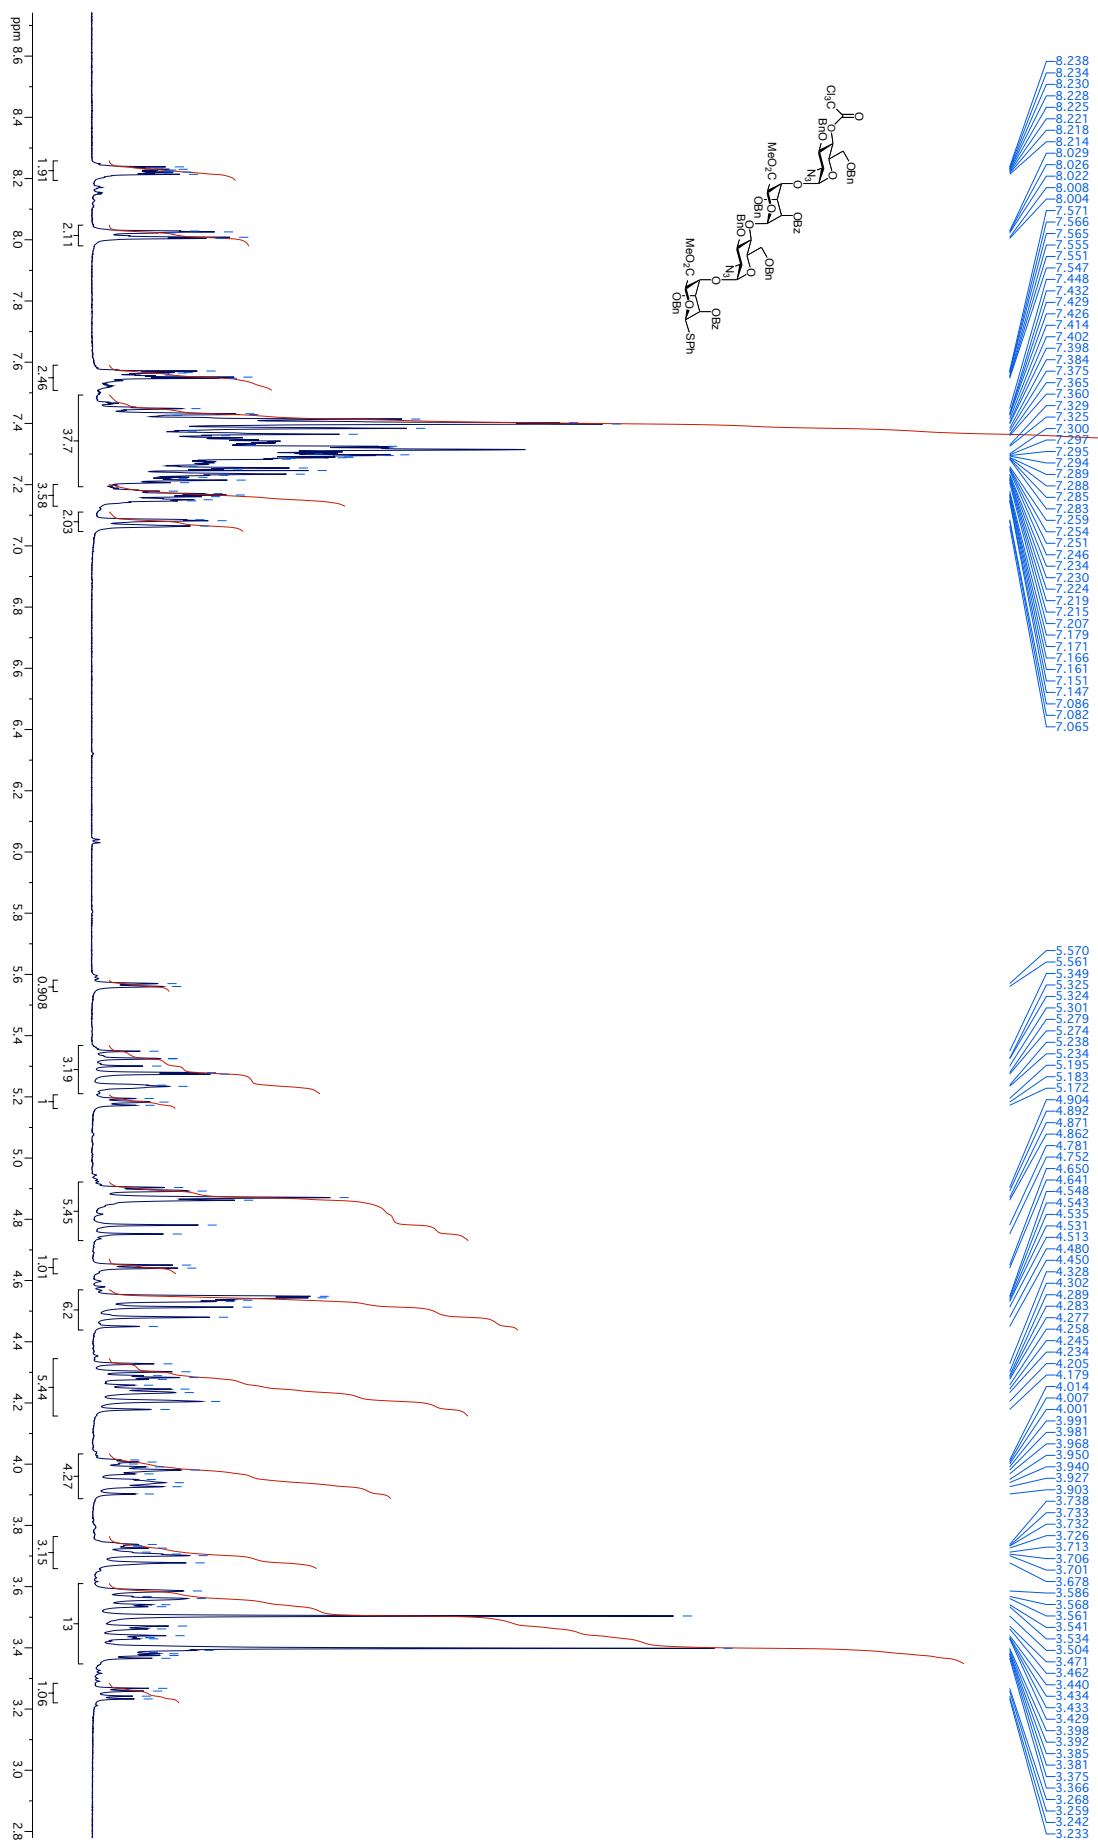

Supplementary Figure S23.  $^1\text{H}$  NMR (400 MHz;  $\text{CDCl}_3$ ) spectrum for  $\beta$ -8

SU1522

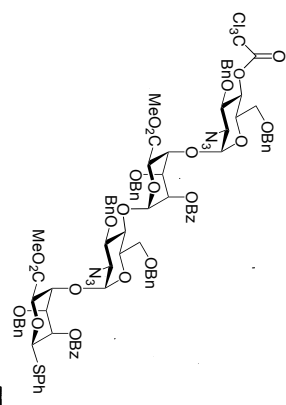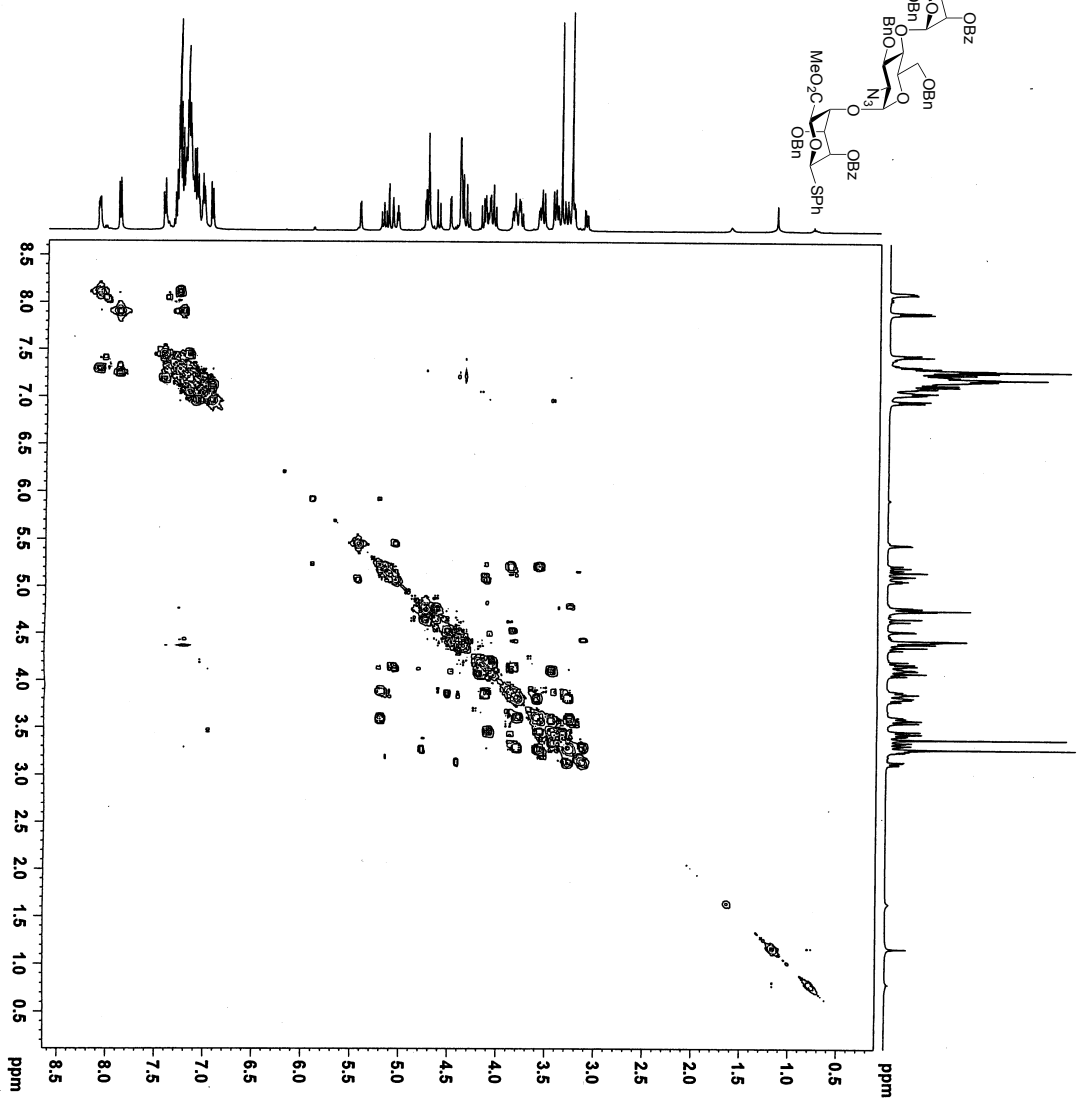

Current Data Parameters  
 EXNO Jun20-2012-3mns  
 PROCNO 1  
 F2 - Acquisition Parameters  
 Date\_ 20120620  
 Time 22.02  
 INSTRUM 5 mm Hs1H1H2  
 PULPROG zgpg30  
 TD 2048  
 FIDRES 0.0022000  
 AQ 0.00229280  
 SOLVENT CDCl3  
 DS 8  
 SWH 3415.301 Hz  
 FIDRES 1.65927 Hz  
 A 0.25957 sec  
 RG 16  
 DW 146.400 usec  
 DE 6.00 usec  
 TE 300.2 K  
 D0 0.00000000 sec  
 D1 1.31957704 sec  
 D15 0.00020000 sec  
 D16 0.00020000 sec  
 INO 0.00029280 sec  
 ===== CHANNEL f1 =====  
 NUC1 1H  
 P0 10.00 usec  
 F1 10.00 usec  
 SFO1 400.1318111 MHz  
 ===== GRADIENT CHANNEL =====  
 GPM1M 10.00 usec  
 GPM1S 10.00 usec  
 GPM1T 10.00 usec  
 GPM1F 10.00 usec  
 GPM1E 10000.00 usec  
 F1 - Acquisition Parameters  
 TD 128  
 T0 1.20  
 SFO1 400.1318 MHz  
 FIDRES 26.682035 Hz  
 F2 - Processing parameters  
 SF 400.1306584 MHz  
 WDW EM  
 SSB 0  
 GB 0.00 Hz  
 PC 1.40  
 F1 - Processing parameters  
 SI 1024  
 MC2 QF  
 SF 400.1306584 MHz  
 WDW EM  
 SSB 0  
 GB 0.00 Hz

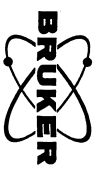

Supplementary Figure S24. COSY NMR spectrum for  $\beta$ -8

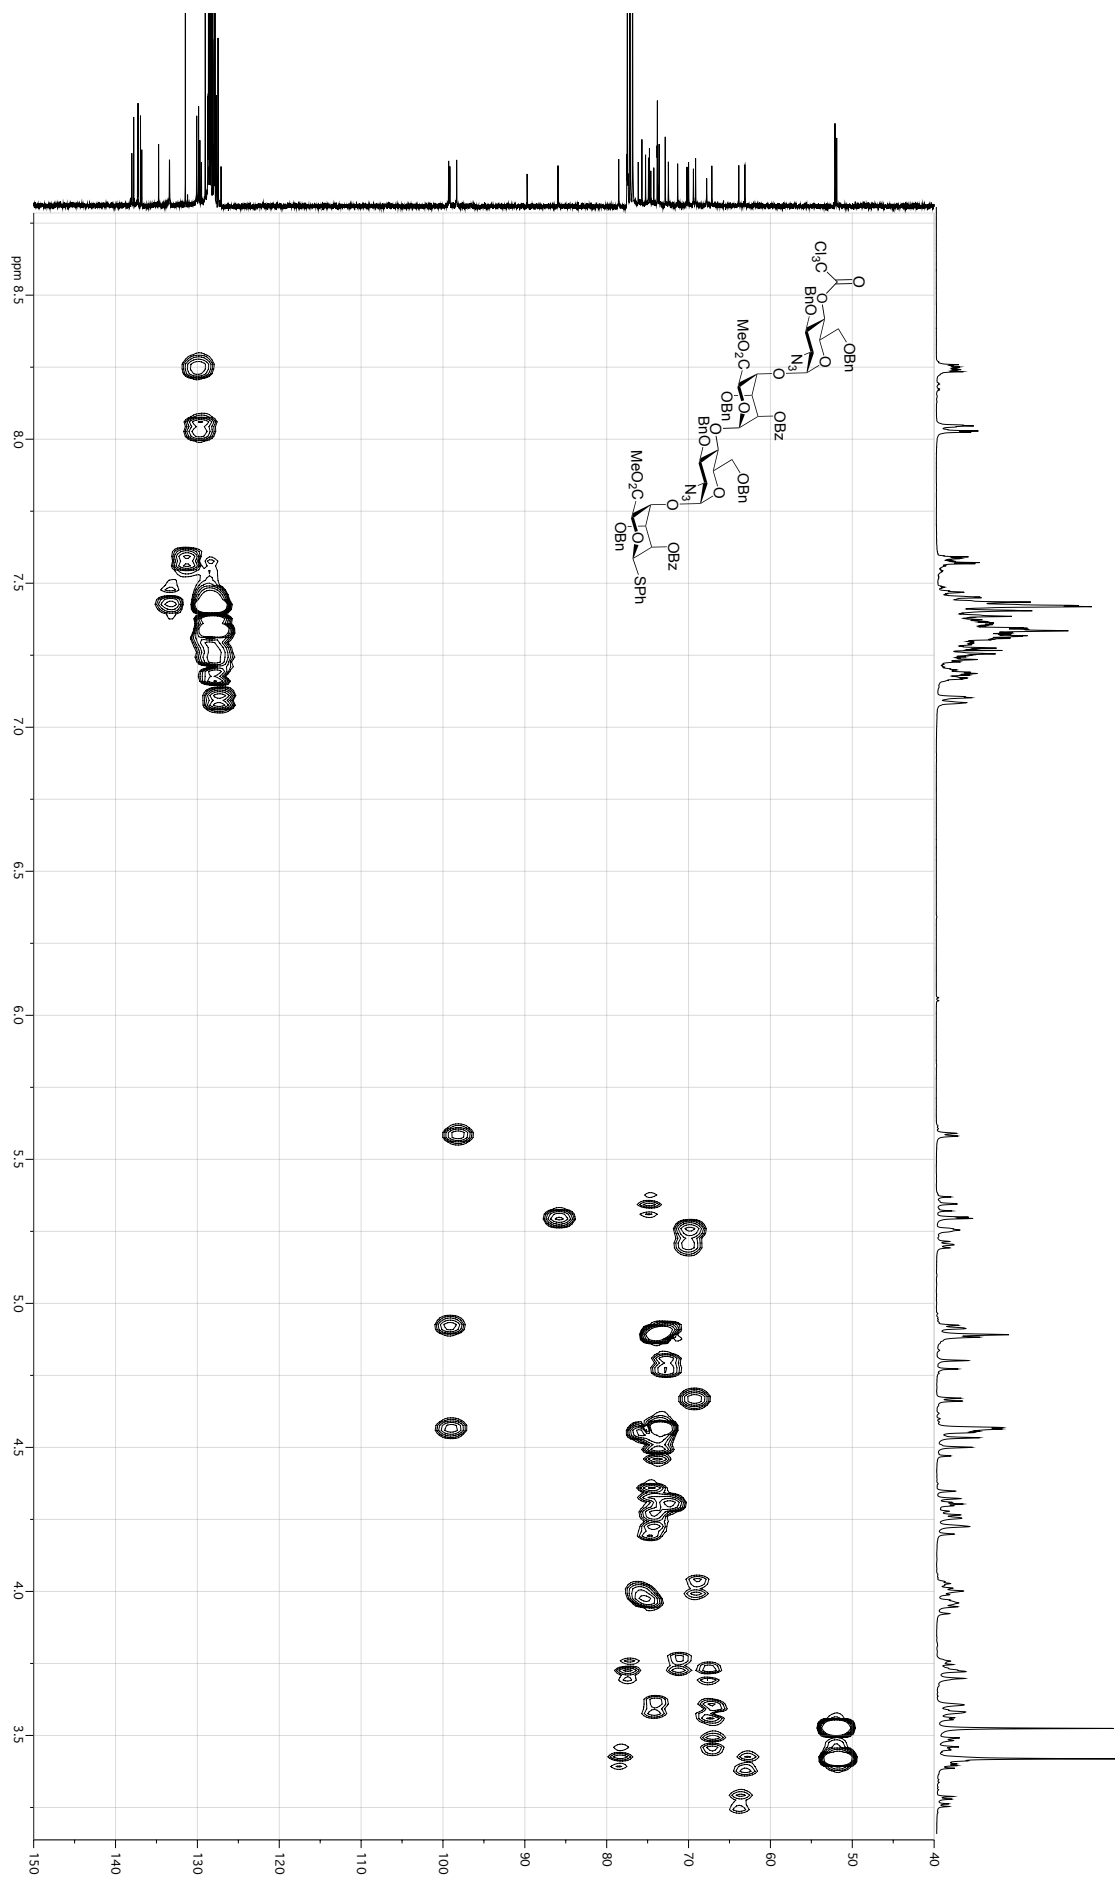

Supplementary Figure S25. HMPC NMR spectrum for  $\beta$ -8



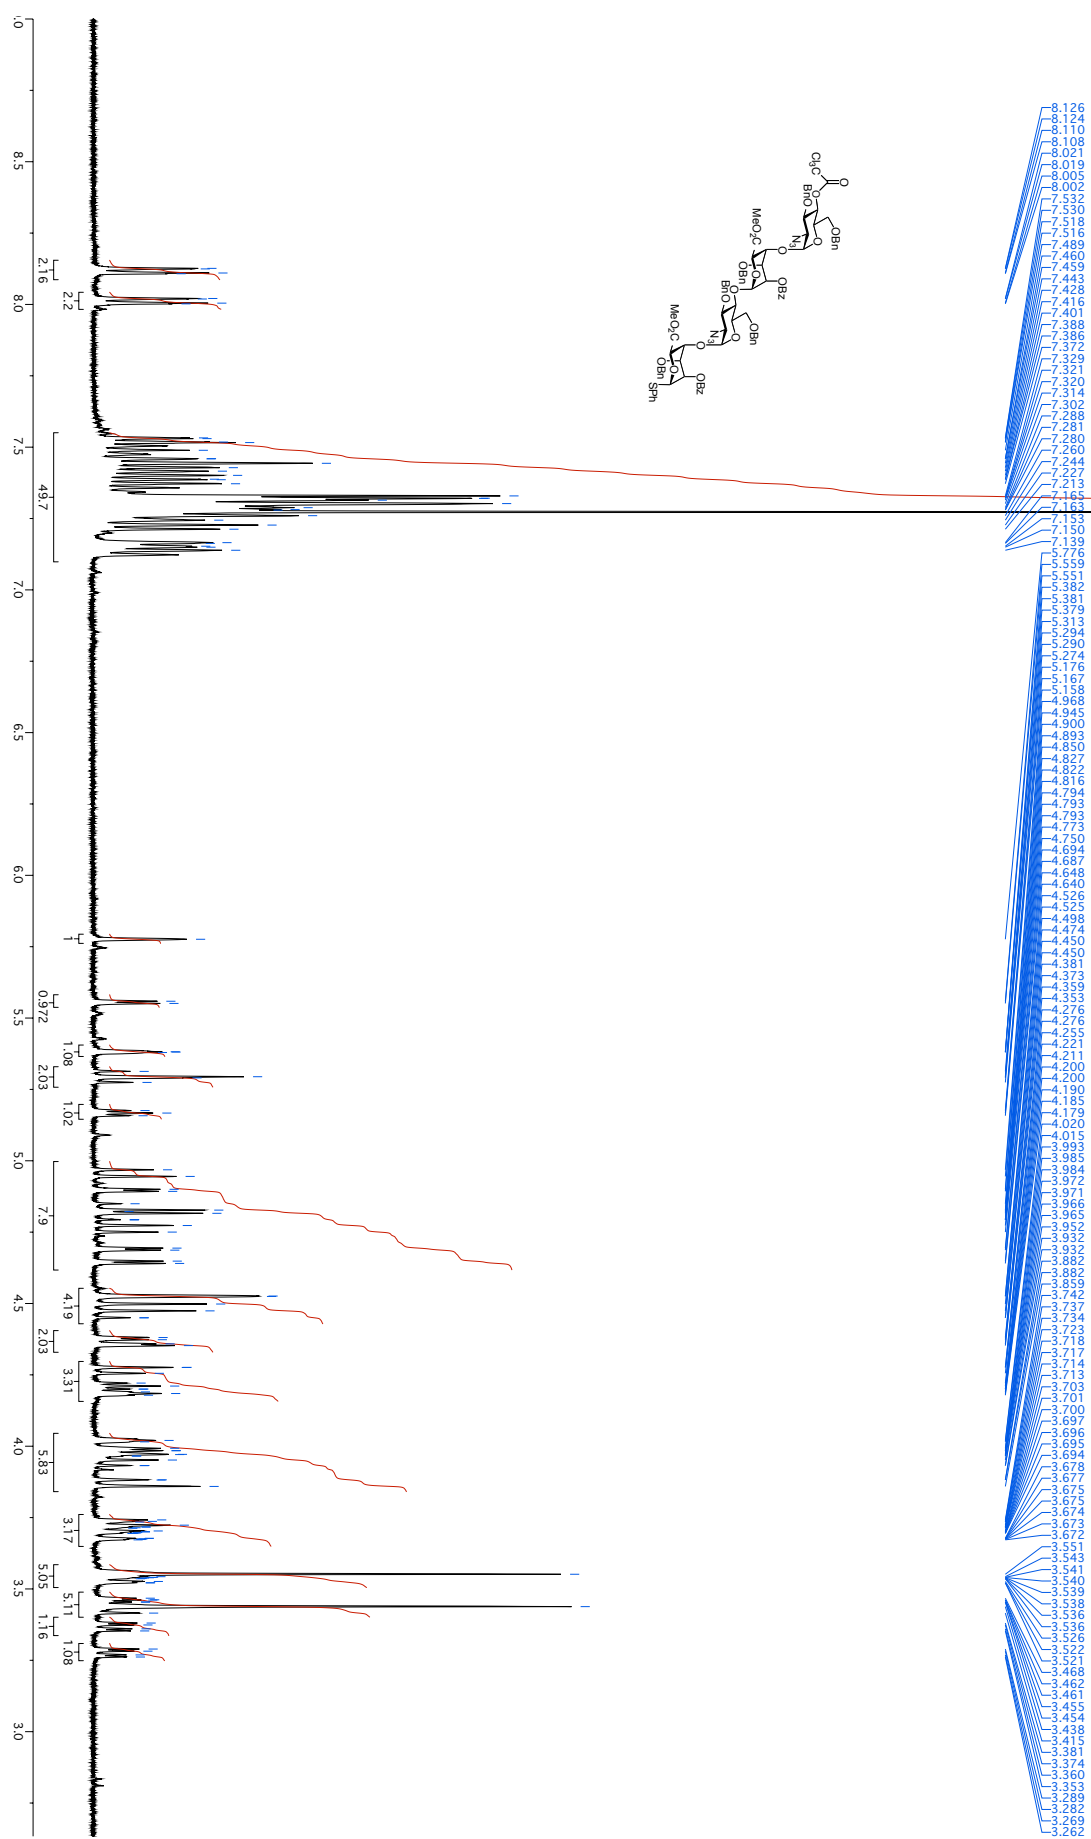



SU1297

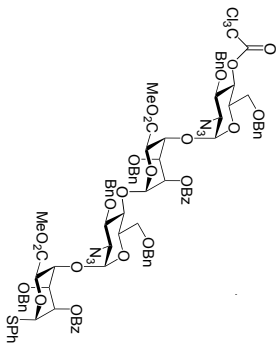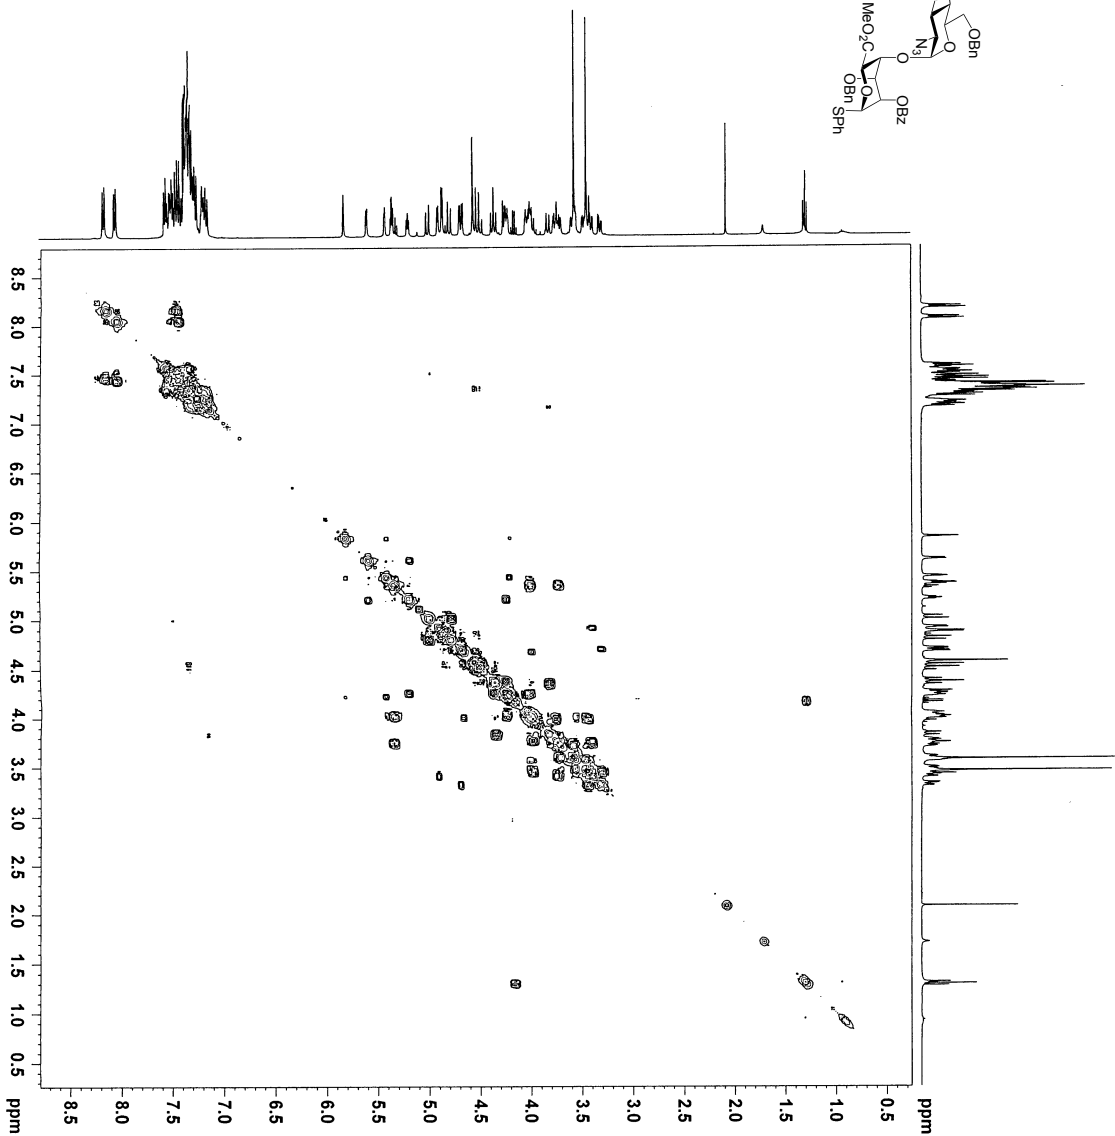

Current Data Parameters  
 NAME: SU1297-2010-S-7  
 EXPTNO: 11  
 PROCNO: 1  
 F2 - Acquisition Parameters  
 Date\_Time: 20100528 1.04  
 INSTRUM: spect  
 F2PROC: 5 mm NMR spect  
 PULPROG: cosypprf  
 TD: 2048  
 SOLVENT: CDCl3  
 NS: 1  
 DS: 1  
 SMH: 3415.301 Hz  
 FIDRES: 1.667627 Hz  
 AQ: 0.299772 sec  
 SFO1: 400.1318116 MHz  
 F2: 400.1318116 MHz  
 IMW: 146.400 usec  
 DE: 6.00 usec  
 TE: 295.2 K  
 D1: 0.00020000 sec  
 D13: 1.3797704 sec  
 D16: 0.00020000 sec  
 INO: 0.00029280 sec  
 CHANNEL: FI  
 NUC1: 1H  
 P1: 10.00 usec  
 PL1: 0.00 dB  
 PL2: -1.10 dB  
 SFO1: 400.1318116 MHz  
 GRNAM1: GRANDIRP CHANNEL  
 SINE: 100  
 GRNAM2: SINE:100  
 GRNAM3: SINE:100  
 GEZ1: 10.00 %  
 GEZ2: 10.00 %  
 I18: 1000.00 usec  
 F1 - Acquisition parameters  
 MD: 121  
 SFO1: 400.1318 MHz  
 FIDRES: 26.682035 Hz  
 SFO: 8.535 ppm  
 F2 - Processing parameters  
 SI: 1024  
 SF: 400.130000 MHz  
 NRG: 3100  
 SSB: 0  
 LB: 0.00 Hz  
 GB: 0  
 PC: 1.40  
 F1 - Processing parameters  
 SI: 1024  
 SF: 400.130000 MHz  
 NRG: 3100  
 SSB: 0  
 LB: 0.00 Hz  
 GB: 0

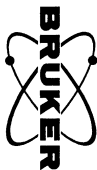

Supplementary Figure S28. COSY NMR spectrum for  $\alpha$ -8

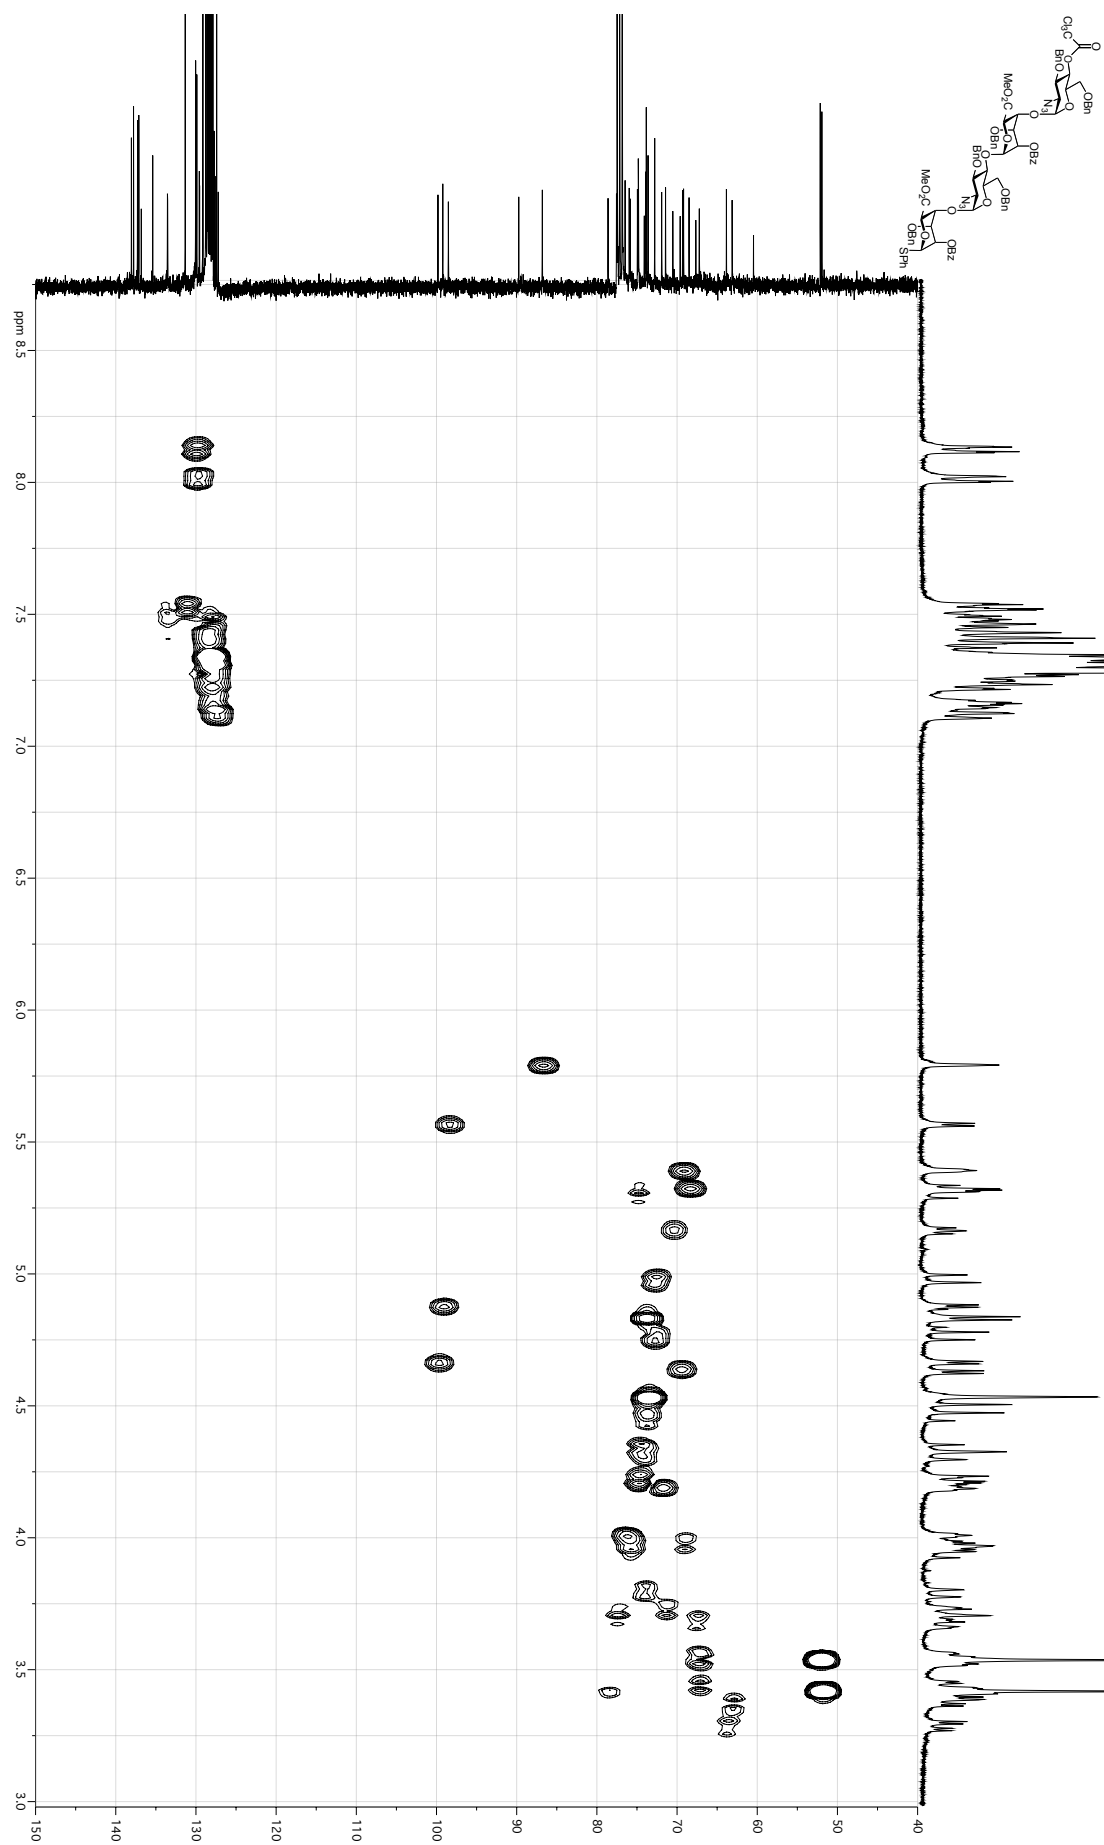

Supplementary Figure S29. HMQC NMR spectrum for  $\alpha$ -8

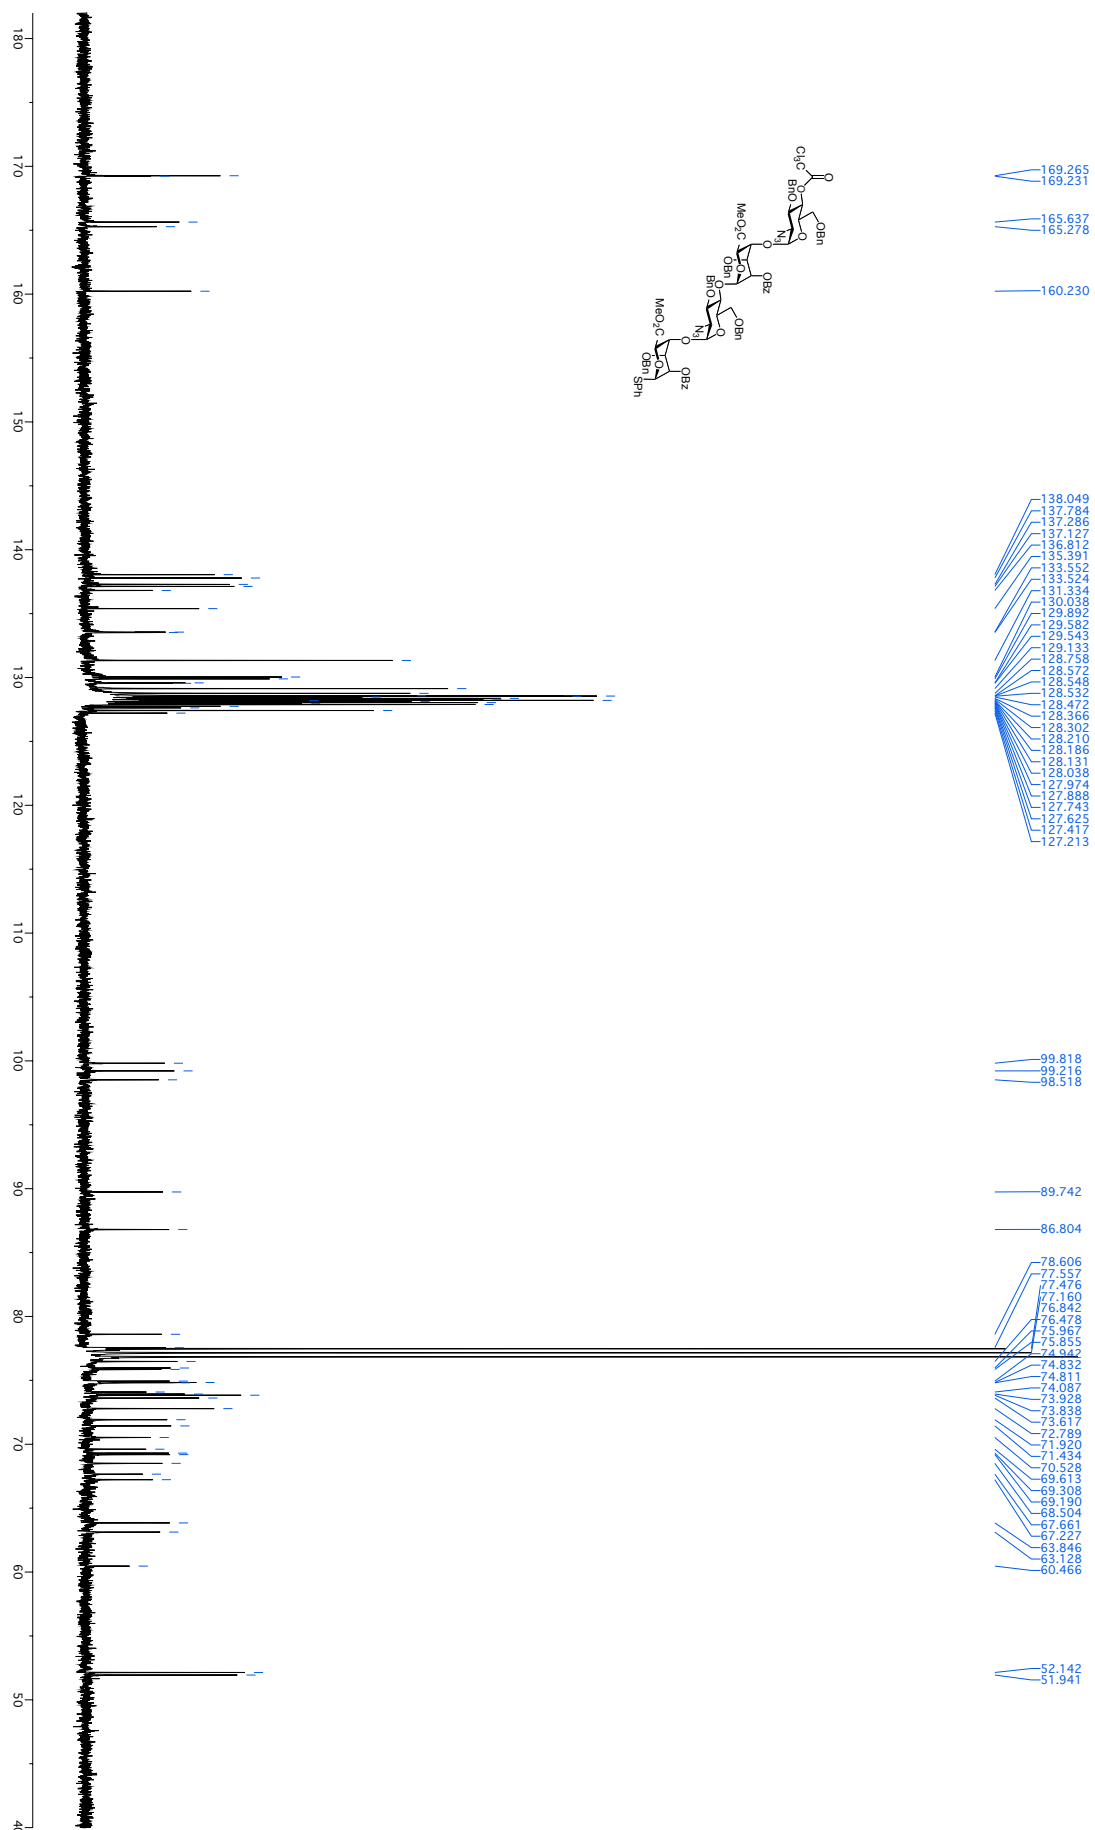

Supplementary Figure S30.  $^{13}\text{C}$  NMR (100 MHz;  $\text{CDCl}_3$ ) spectrum for  $\alpha$ -8

EPSRC National Mass Spectrometry Service Centre (NMSSC), Swansea

<<MANGAR154-VM-MAP\_0001>> Voyager Spec #1=>AdvBC(64,0.5,0.1)=>NF0.7[BP = 1781.5, 7730]

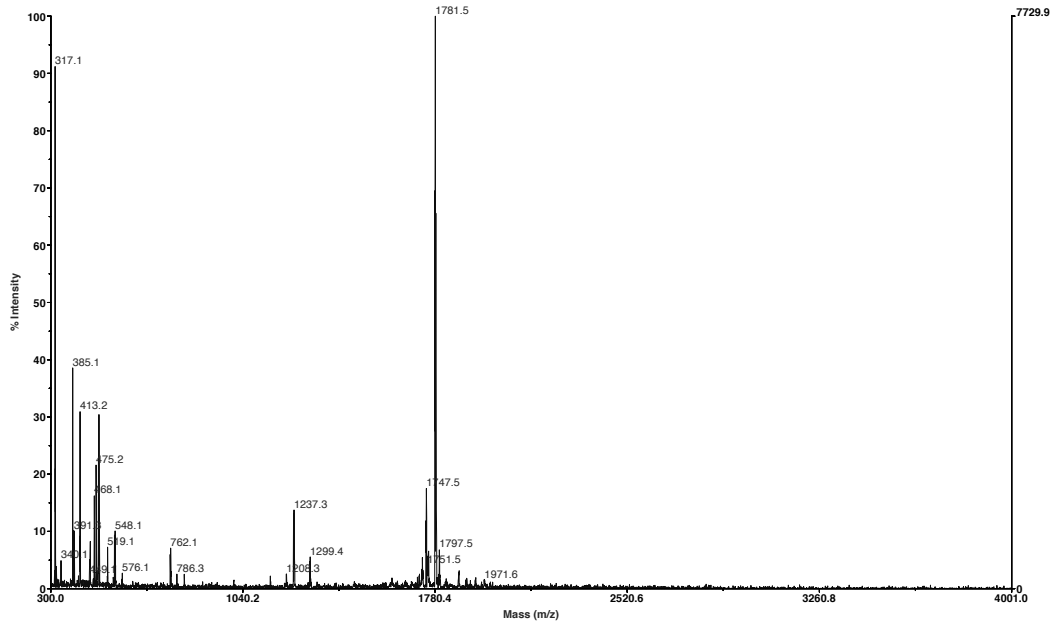

Acquired: 18:14:00, May 09, 2012  
Hansen SU1297 MW=1756?? DCM PosRef [1:49] (Dith;DCM) +NaOAc  
D:\2012\May12\MANGAR154-VM-MAP\_0001.dat

Printed: 09:35, May 10, 2012

EPSRC National Mass Spectrometry Service Centre (NMSSC), Swansea

<<MANGAR154-VM-MAP\_0001>> Voyager Spec #1=>AdvBC(64,0.5,0.1)=>NF0.7[BP = 1781.5, 7730]

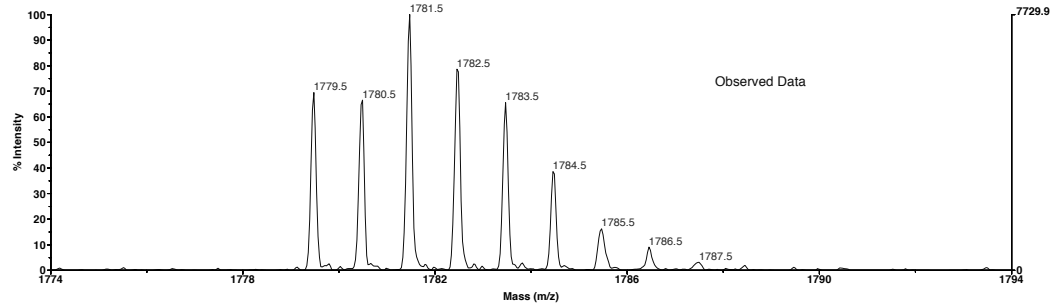

ISO:C90H87Cl3N6O23SNa

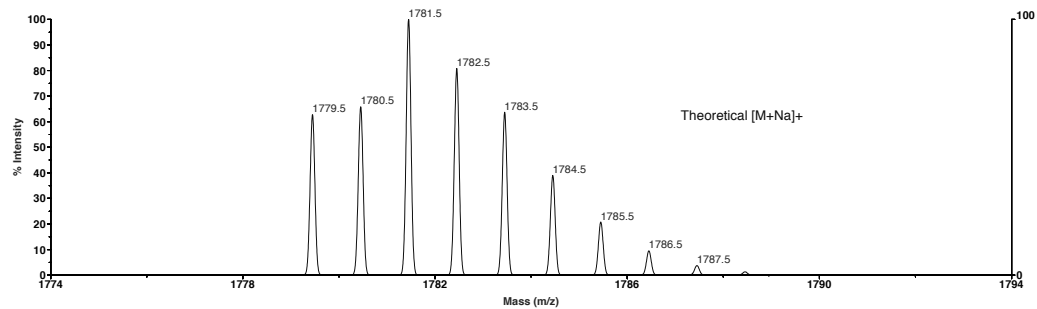

Acquired: 18:14:00, May 09, 2012  
Hansen SU1297 MW=1756?? DCM PosRef [1:49] (Dith;DCM) +NaOAc  
D:\2012\May12\MANGAR154-VM-MAP\_0001.dat

Printed: 09:37, May 10, 2012

Supplementary Figure S31. MALDI-TOF spectrum for  $\alpha$ -8

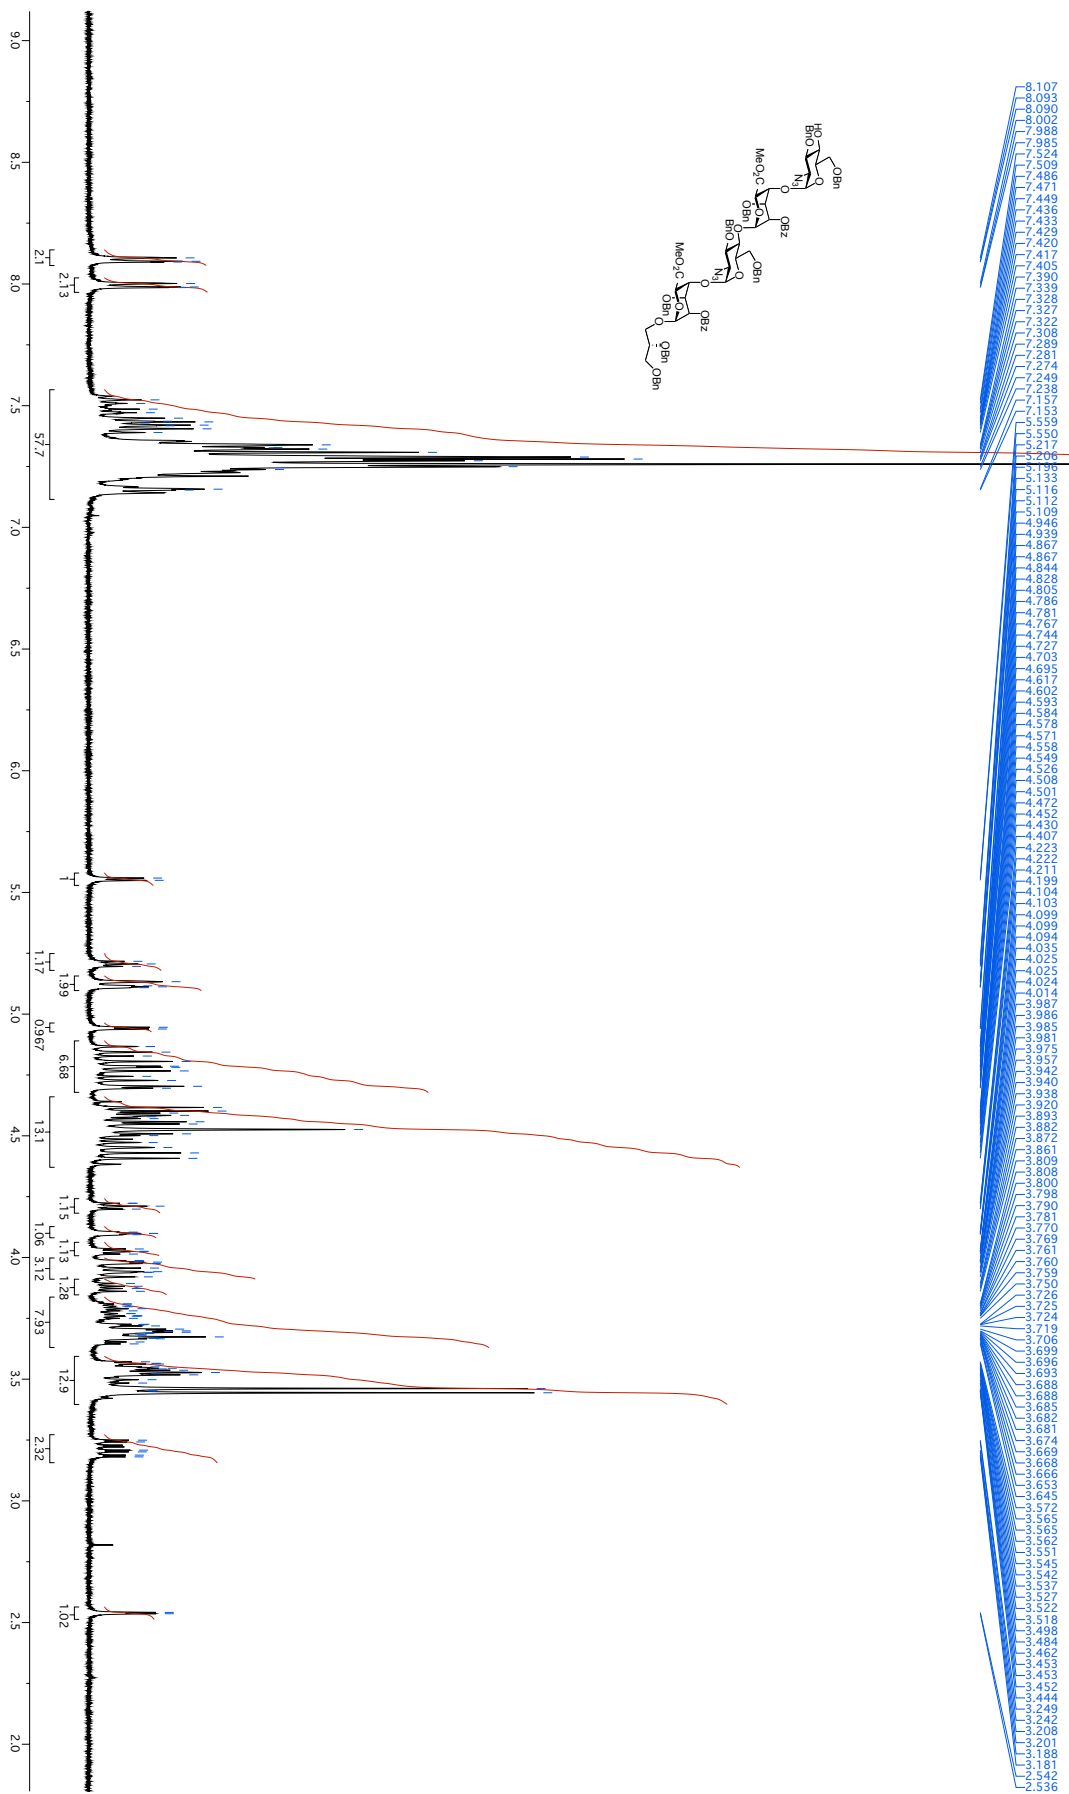

Supplementary Figure S32. <sup>1</sup>H NMR (500 MHz; CDCl<sub>3</sub>) spectrum for 9

SU1290B

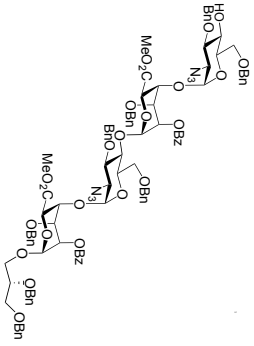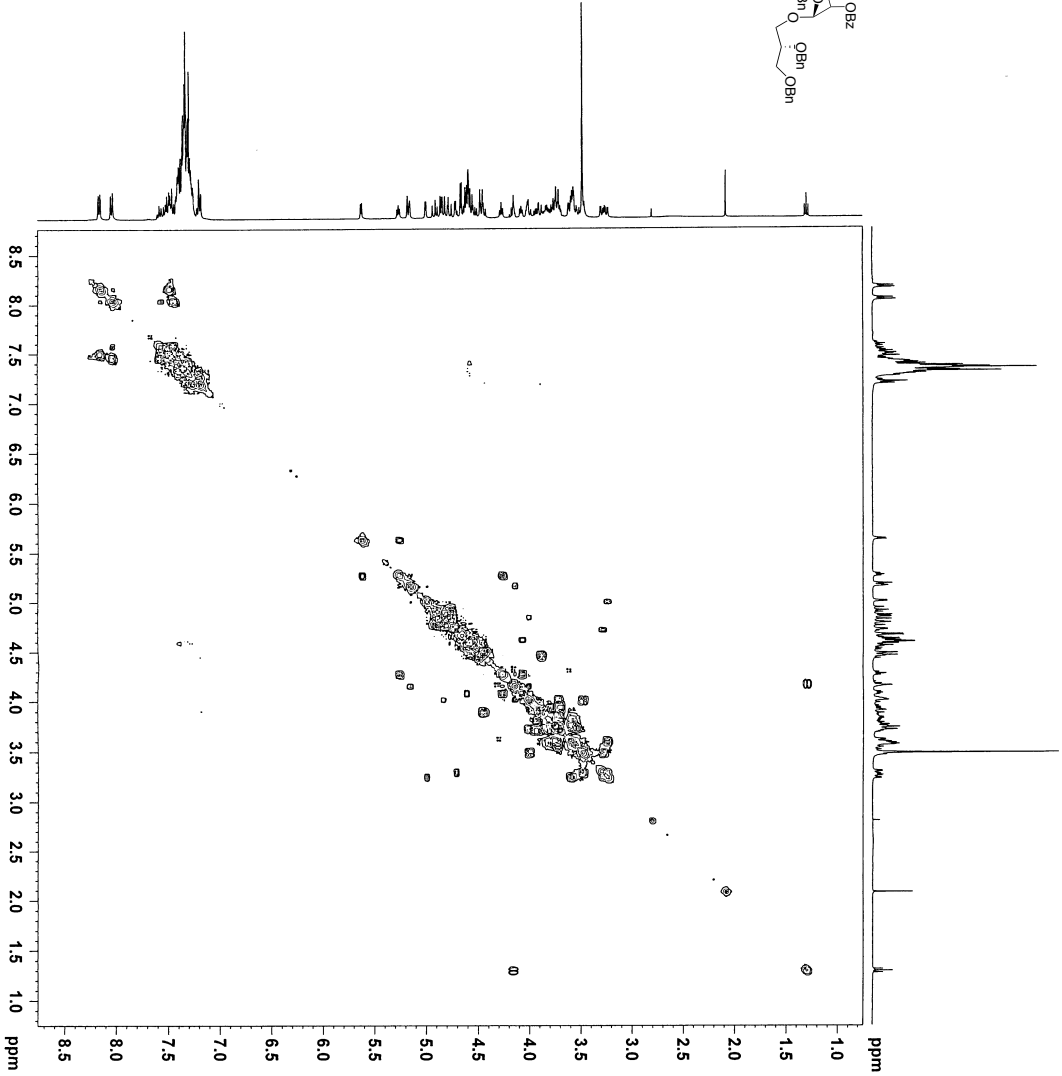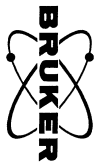

Current Data Parameters  
 NAME May98-2010-5-G  
 EXPNO 1  
 PROCNO 1  
 F2 - Acquisition Parameters  
 Date\_ 20100508  
 Time 19.41  
 INSTRUM spect  
 PULPROG zgpg30  
 TD 2048  
 SOLVENT CDCl<sub>3</sub>  
 NS 6  
 DS 8  
 SWH 3205.128 Hz  
 FIDRES 0.1355380 Hz  
 RG 25.4  
 OX 156.000 usec  
 PZ 294.2 K usec  
 TE 294.2 K usec  
 D0 0.00000300 sec  
 D1 0.25000000 sec  
 D16 0.00000000 sec  
 INO 0.00031200 sec  
 CHANNEL f1  
 NUC1 <sup>1</sup>H  
 P0 10.00 usec  
 PL1 -0.10 dB  
 SFO1 400.1319029 MHz  
 ----- GRADIENT CHANNEL -----  
 GRNNA1 SINE:100  
 GRNZ1 10.00 %  
 GRZ2 10.00 %  
 P16 1000.00 usec  
 F1 - Acquisition parameters  
 NQ0  
 TD 128  
 SFO 400.1319 MHz  
 SM FIDRES 23.0010 ppm  
 F2 - Processing parameters  
 SI 1024  
 SF 400.1300000 MHz  
 WDW SINC  
 LB 0.00 Hz  
 GB 0  
 PC 1.40  
 F1 - Processing parameters  
 SI 1024  
 SF 400.1300000 MHz  
 WDW SINC  
 SSB 0  
 CB 0

Supplementary Figure S33. COSY NMR spectrum for 9

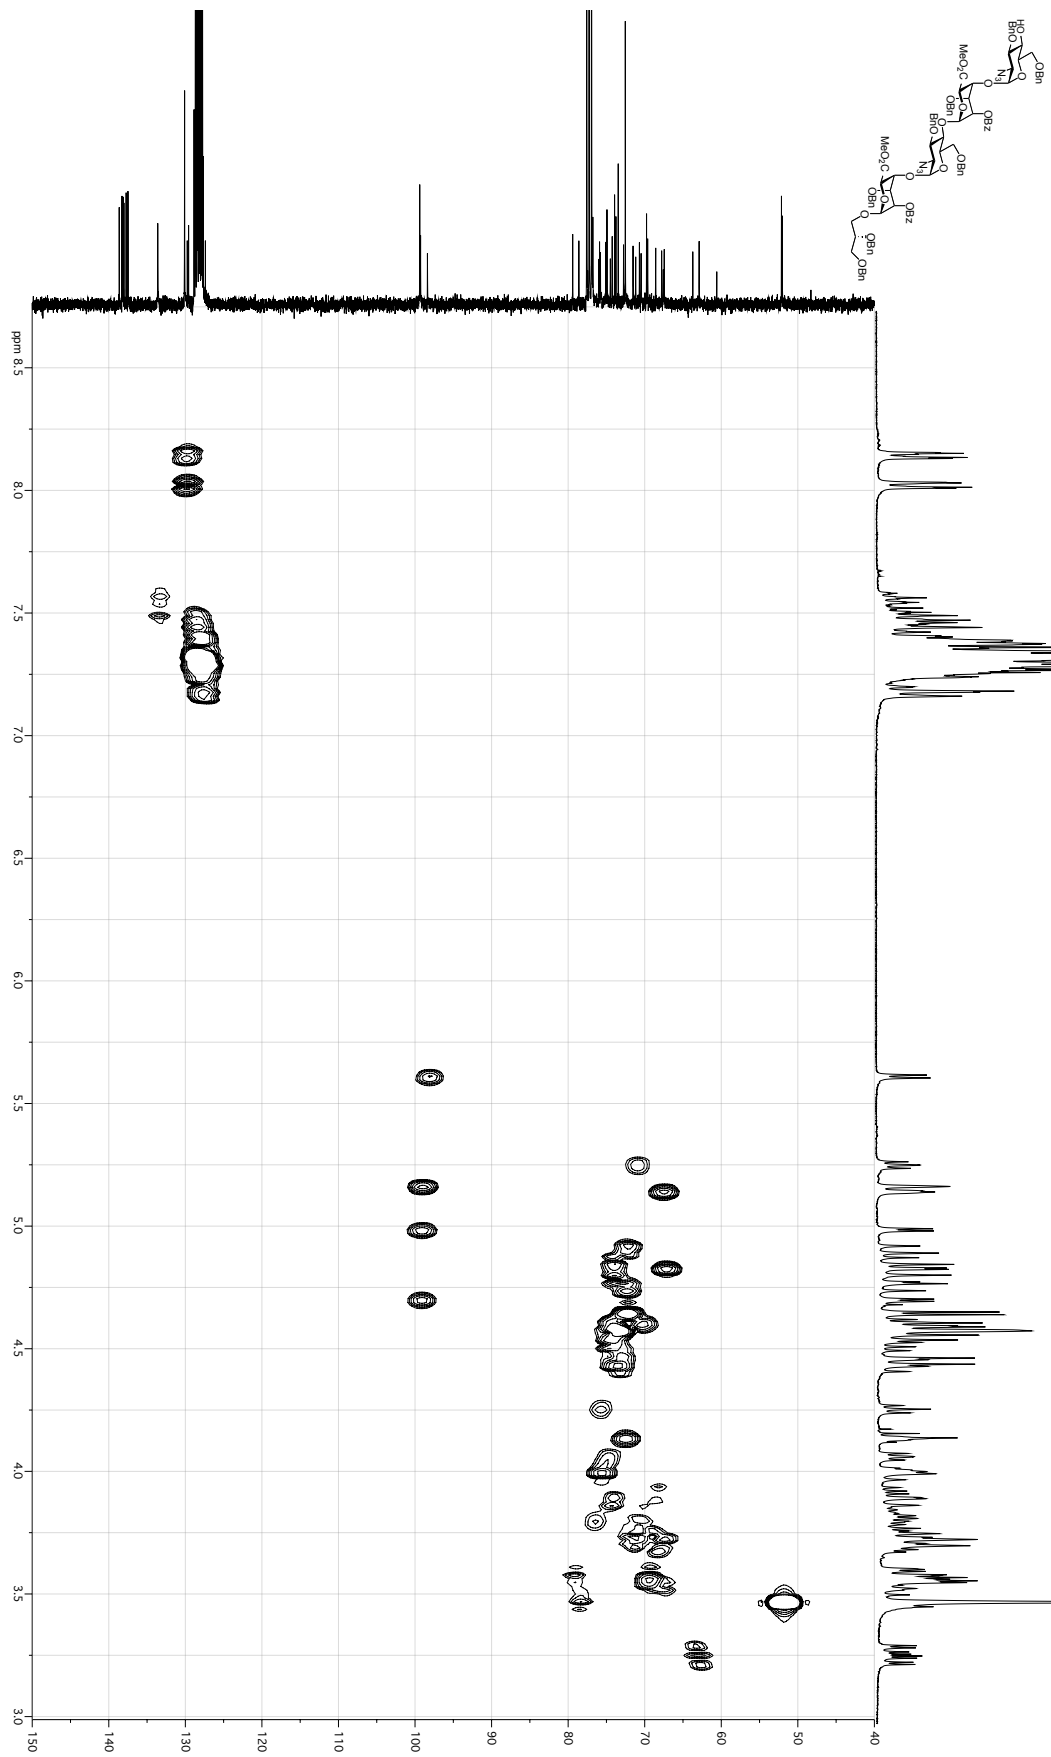

Supplementary Figure S34. HMBC NMR spectrum for 9

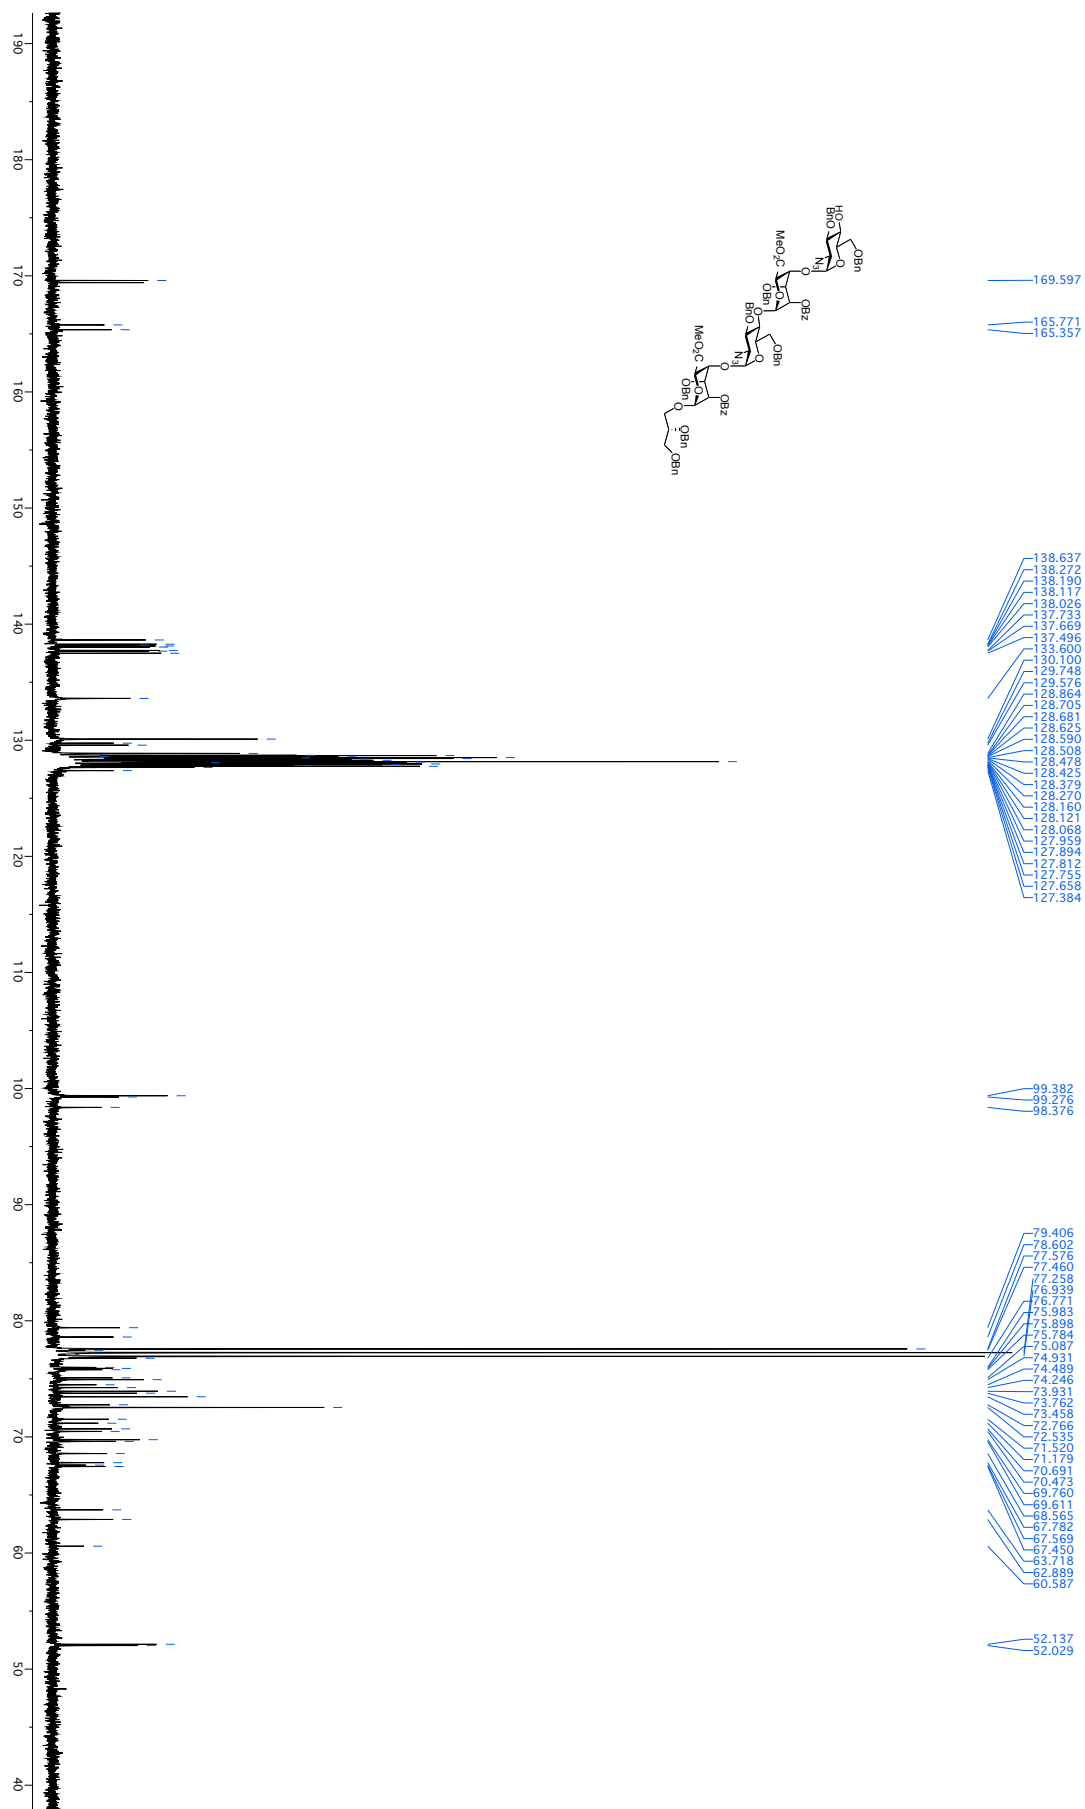

Supplementary Figure S35. <sup>13</sup>C NMR (100 MHz; CDCl<sub>3</sub>) spectrum for 9



MANGAR139-OV-HNESP #92-106 RT: 2.03-2.43 AV: 15 SM: 7G NL: 2.95E6  
T: FTMS + p NSI Full ms [200.00-4000.00]

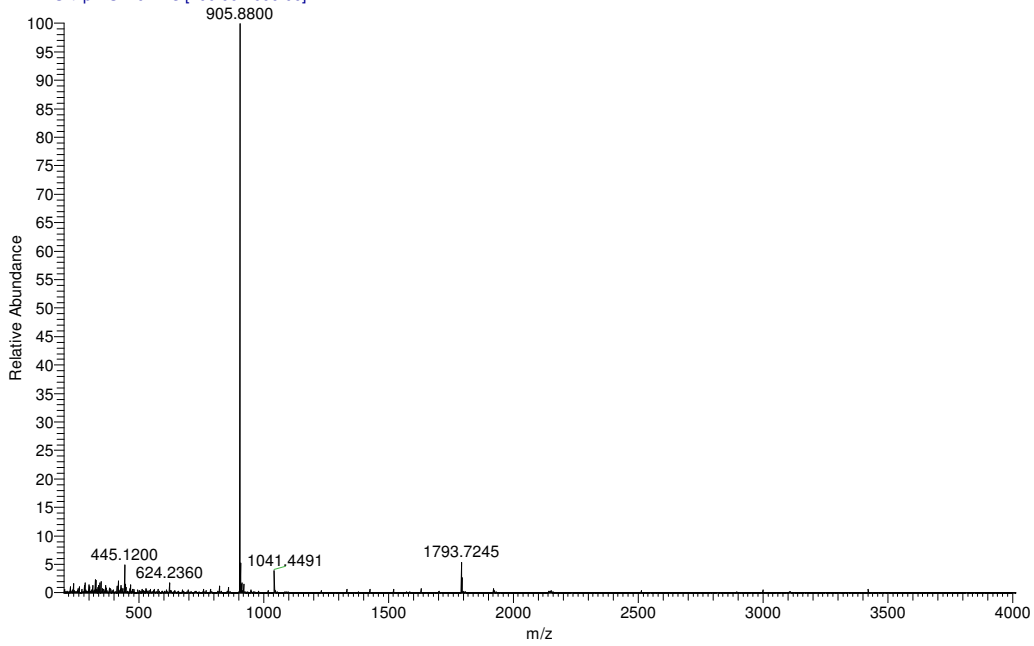

SM: 7G

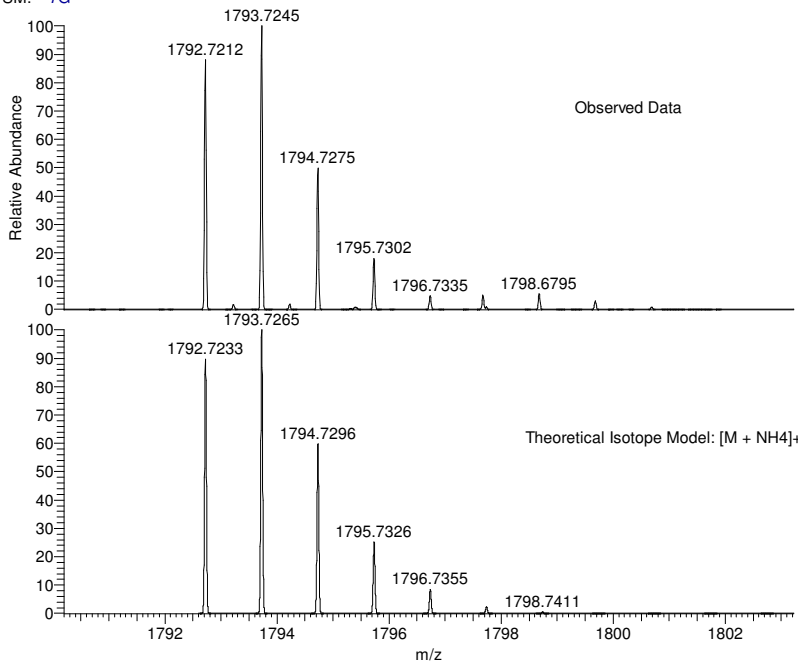

NL:  
1.57E5  
MANGAR139-OV-HNESP#92-  
106 RT: 2.03-2.43 AV: 15 T:  
FTMS + p NSI Full ms  
[200.00-4000.00]

NL:  
8.18E3  
C<sub>99</sub>H<sub>102</sub>N<sub>6</sub>O<sub>25</sub>NH<sub>4</sub>:  
C<sub>99</sub>H<sub>106</sub>N<sub>7</sub>O<sub>25</sub>  
p (gss, s /p:40) Chrg 1  
R: 50000 Res .Pwr .@FWHM

Supplementary Figure S36. FT MS spectrum for 9

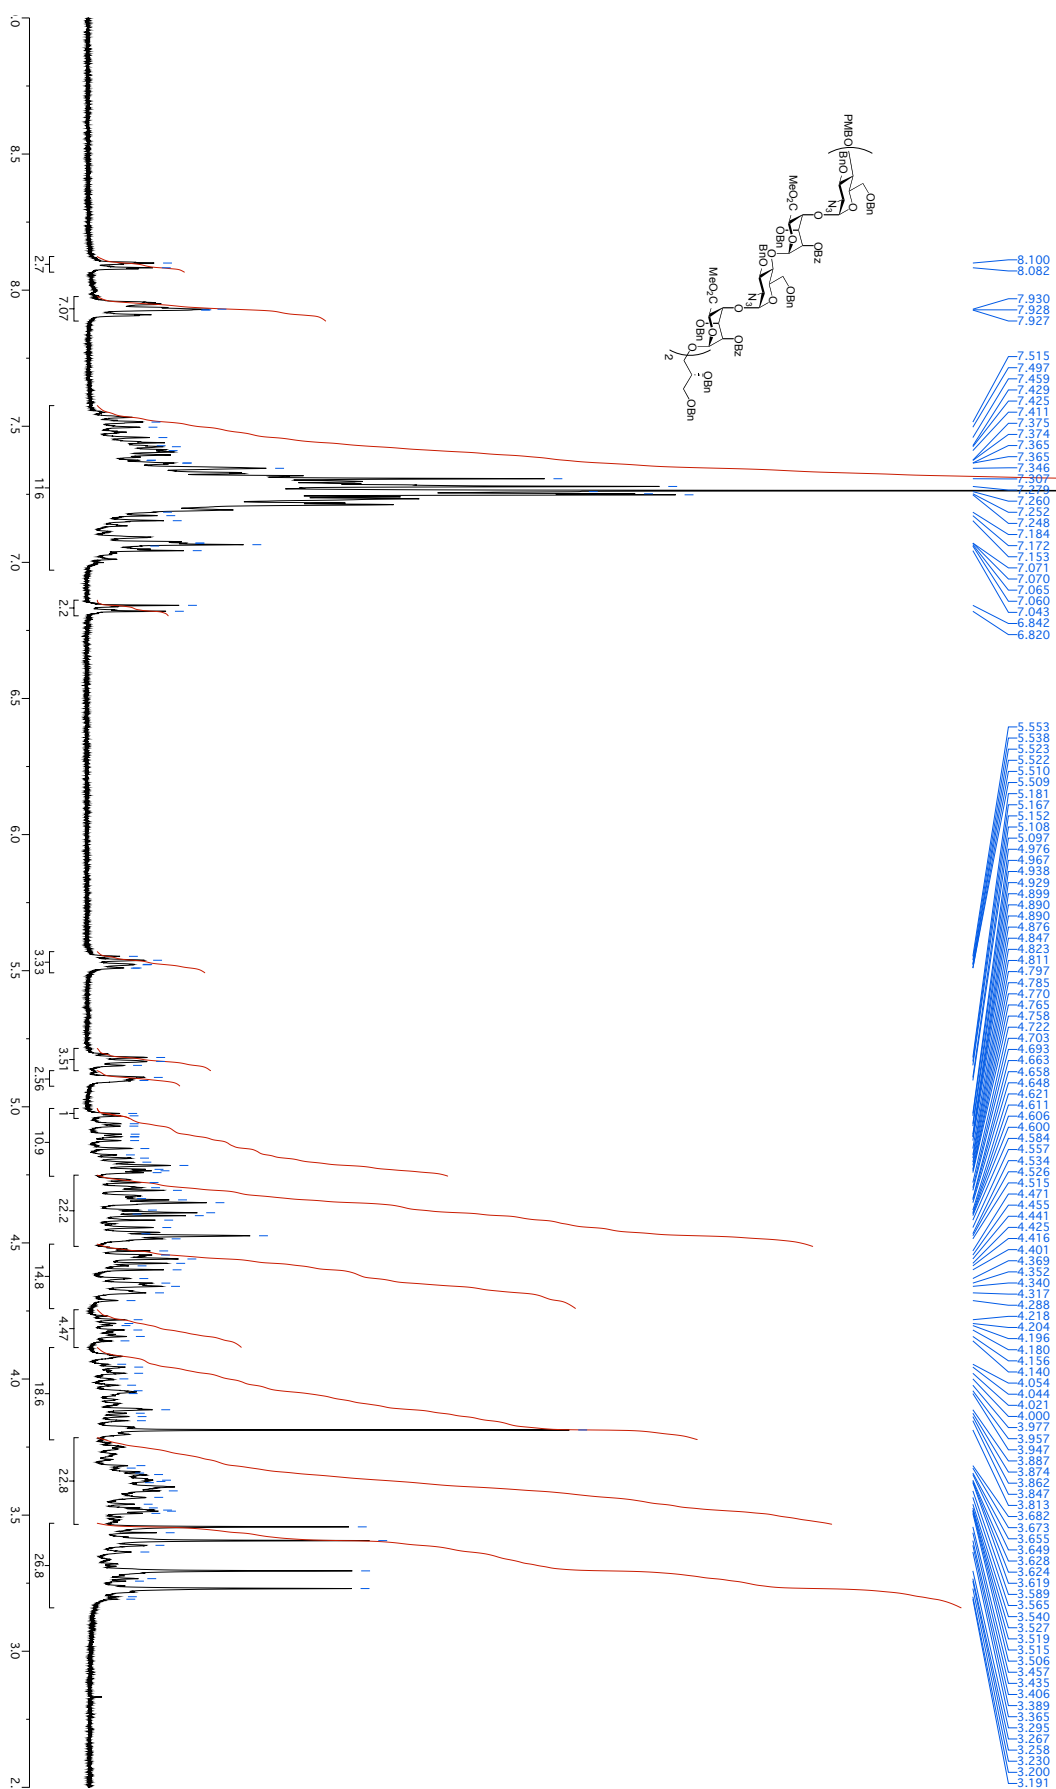

Supplementary Figure S37. <sup>1</sup>H NMR (400 MHz; CDCl<sub>3</sub>) spectrum for 10

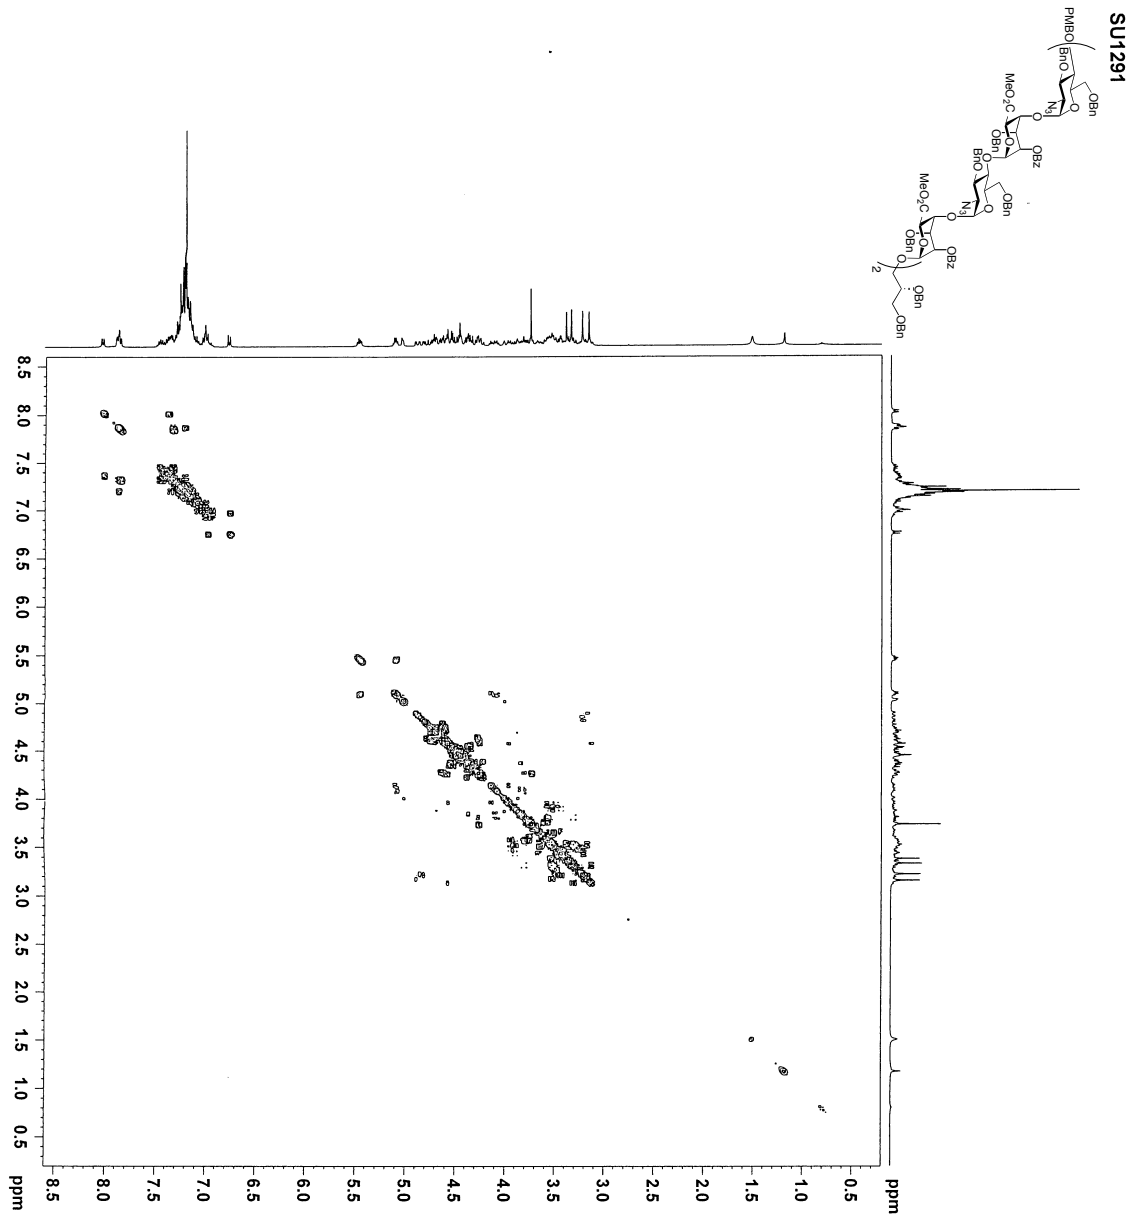

**BRUKER**

Current Data Parameters  
 Name: SU1291  
 EXNO: 31  
 PROCNO: 1

F2 - Acquisition Parameters  
 Date\_: 20120228  
 Time: 11.55  
 INSTRUM: spect  
 PULPROG: zgpg30  
 PU1PROG: ccsygpqf  
 TD: 2048  
 NS: 2048  
 DS: 8  
 SWH: 3460.215 Hz  
 FWHM: 12.000 Hz  
 AQ: 0.3047924 sec  
 RG: 114  
 DM: 148.800 usec  
 DE: 5.000 usec  
 TE: 300.0 K  
 D0: 0.00000000 sec  
 d1: 1.37000000 sec  
 d11: 0.00000000 sec  
 D16: 0.00020000 sec  
 INO: 0.00029760 sec

===== CHANNEL f1 =====  
 NUC1: 1H  
 P1: 10.00 usec  
 PL1: 0.00 dB  
 SFO1: 400.1317998 MHz

===== GRADIENT CHANNEL =====  
 GGRM1: SINE:100  
 GPR1: 10.00 usec  
 GPR2: 10.00 usec  
 PL2: 0.00 dB  
 PL6: 1000.00 usec

F1 - Acquisition parameters  
 SI: 128  
 TD: 128  
 SFO1: 400.1318 MHz  
 FIDRES: 26.251680 Hz  
 SF: 400.1318 MHz  
 OF: 0.00000000 ppm  
 FMODE: OF

F2 - Processing parameters  
 SI: 128  
 SF: 400.1300389 MHz  
 WTM: SINE  
 SSB: 0.00 Hz  
 LB: 1.40 Hz  
 GB: 0.00 Hz  
 PC: 1.40

F1 - Processing parameters  
 SI: 1024  
 MC2: OF  
 SF: 400.1300389 MHz  
 WTM: SINE  
 SSB: 0.00 Hz  
 LB: 0.00 Hz  
 GB: 0

Supplementary Figure S38. COSY NMR spectrum for 10

SU1291 MW=3397?  
(DCM)/MeOH + NH4OAc  
EP SRC National Centre Swansea  
LTQ Orbitrap XL  
Steen Hansen  
01/05/2012 13:24:09

MANGAR156-OJ-HNESP #89-109 RT: 1.92-2.49 AV: 21 SM: 7G NL: 2.26E6  
T: FTMS + p NSI Full ms [200.00-4000.00]

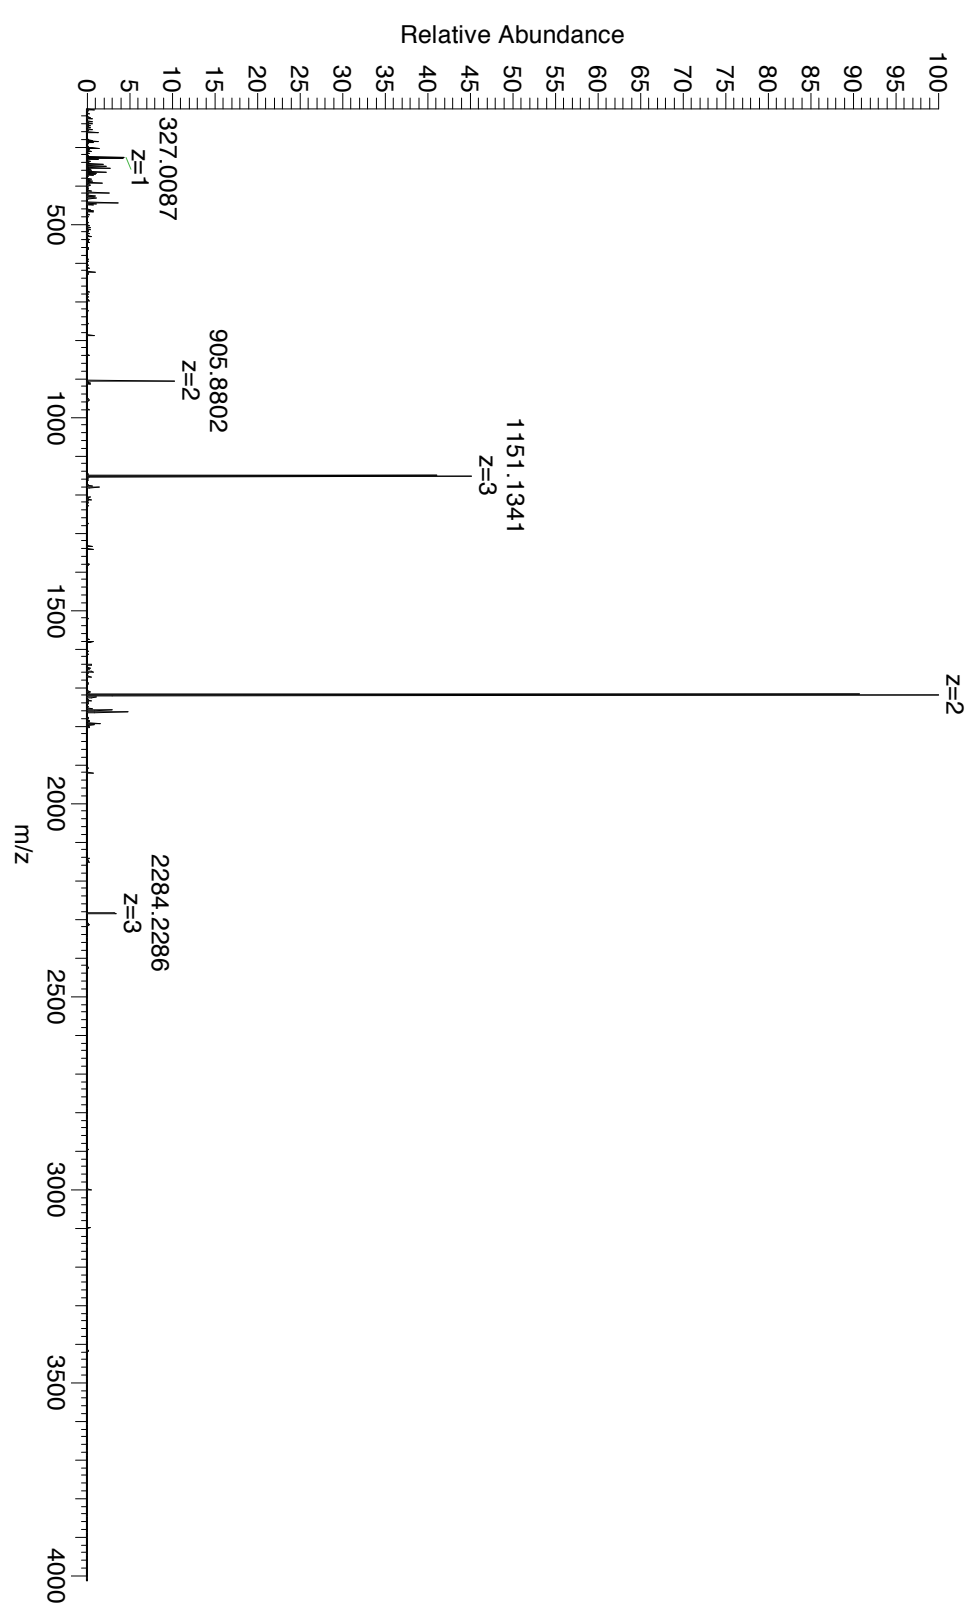

Supplementary Figure S39. FT MS spectrum for 10



SU1303

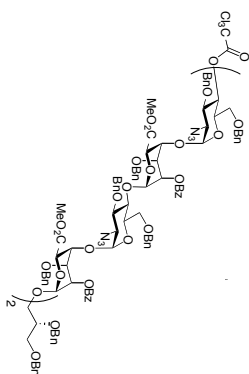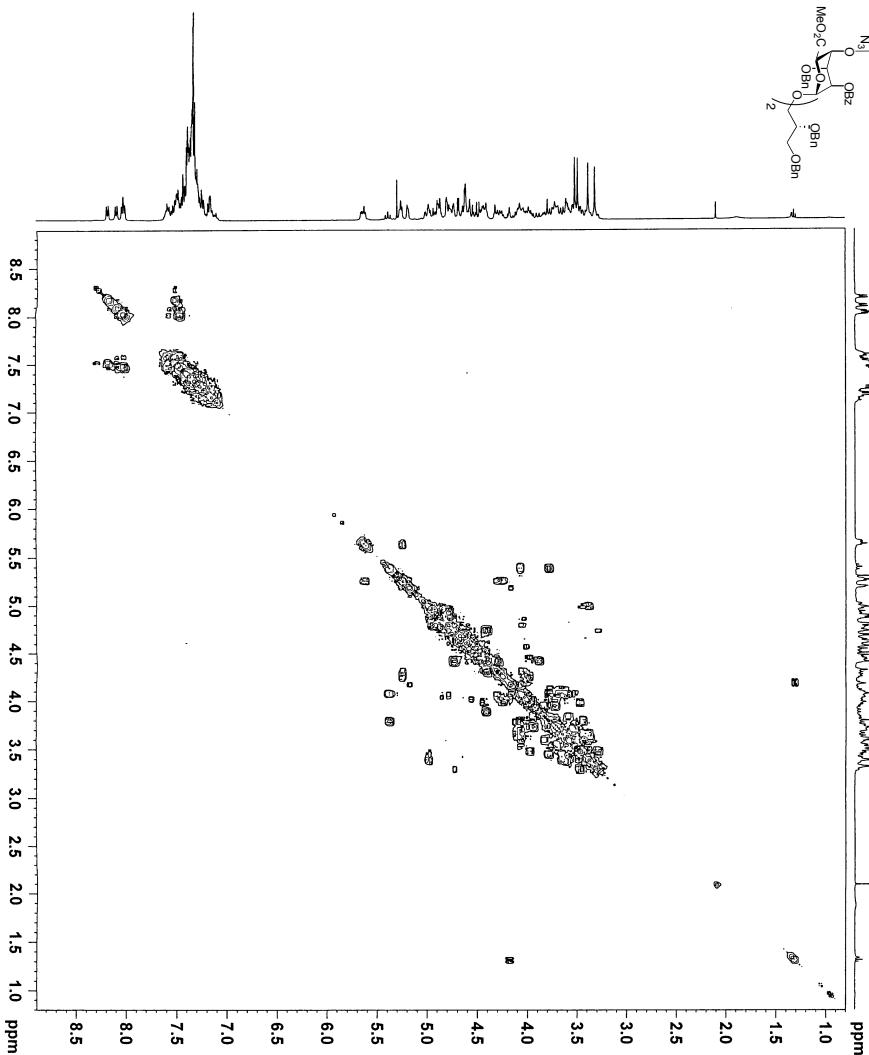

Current Data Parameters  
 EXNO 10  
 PROCNO 11  
 F2 - Acquisition Parameters  
 Date\_ 20100605  
 Time 16.58  
 Run 1  
 Prgnm 5 mm hmltnc1  
 Prbnd 5 mm hmltnc1  
 PULPROG carygpgf  
 TD 6548  
 SFO 400  
 SOLVENT cdcl3  
 NS 1  
 DS 1  
 FIDRES 328.348 Hz  
 FTRES 1.581222 Hz  
 AQ 0.3162612 sec  
 AC 14.43  
 DC 14.43  
 DE 5.00 usec  
 TE 294.2 K  
 T1 0.60000000 sec  
 T1RHO 0.00000000 sec  
 d13 1.3619304 sec  
 D16 0.00020000 sec  
 ANS 0.00000000 sec  
 ===== CHANNEL f1 =====  
 NU1 1  
 P1 10.00 usec  
 PL 0.00 dB  
 PR1 9.10 dB  
 SFO1 400.13992 MHz  
 ===== CHANNEL =====  
 GRADIENT CHANNEL =====  
 GPCP1 10.00 usec  
 GPCP2 10.00 usec  
 GPCP3 10.00 usec  
 GPCP4 10.00 usec  
 GPCP5 10.00 usec  
 F1 - Acquisition parameters  
 TD 128  
 SFO1 400.1319 MHz  
 SF 25.229547 Hz  
 FIDRES 0.147 ppm  
 OF 0  
 F2 - Processing parameters  
 SI 1024  
 SF 400.130000 MHz  
 WDW SINE  
 SSB 0  
 GB 0  
 PC 1.40  
 F1 - Processing parameters  
 SI 1024  
 SF 400.130000 MHz  
 WDW SINE  
 SSB 0  
 GB 0

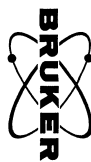

Supplementary Figure S41. COSY NMR spectrum for 11

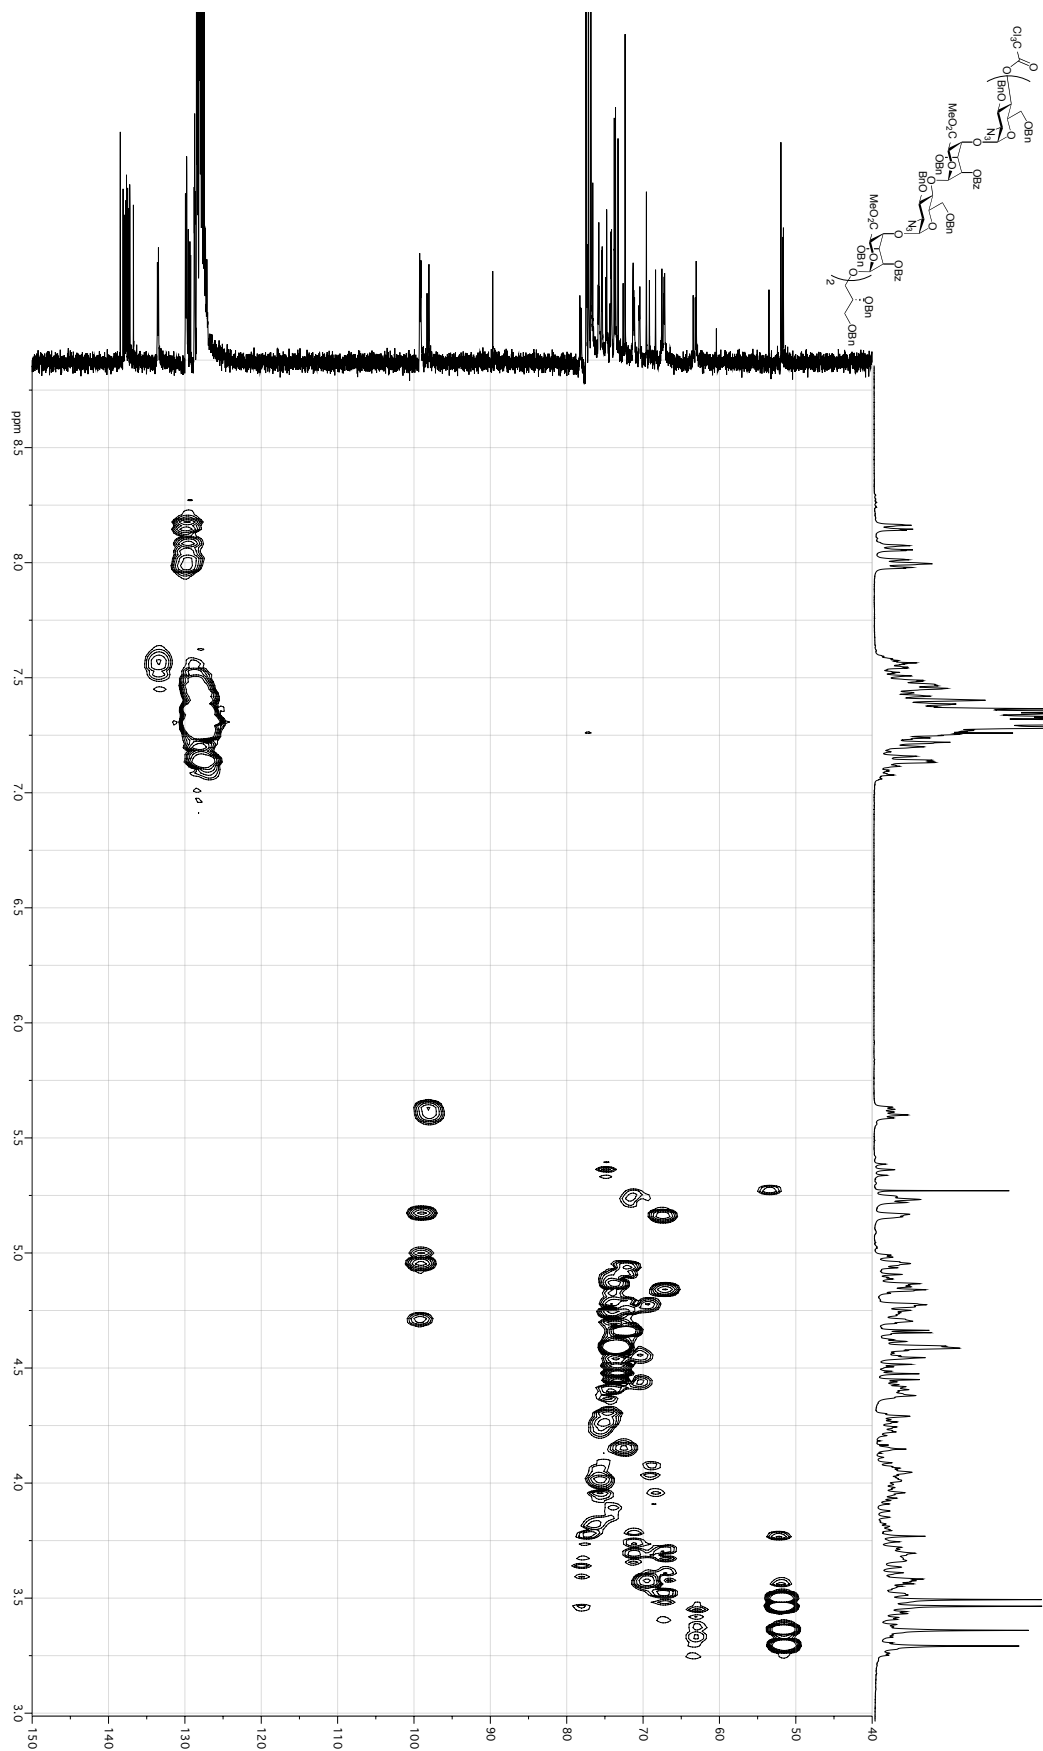

Supplementary Figure S42. HMQC NMR spectrum for 11

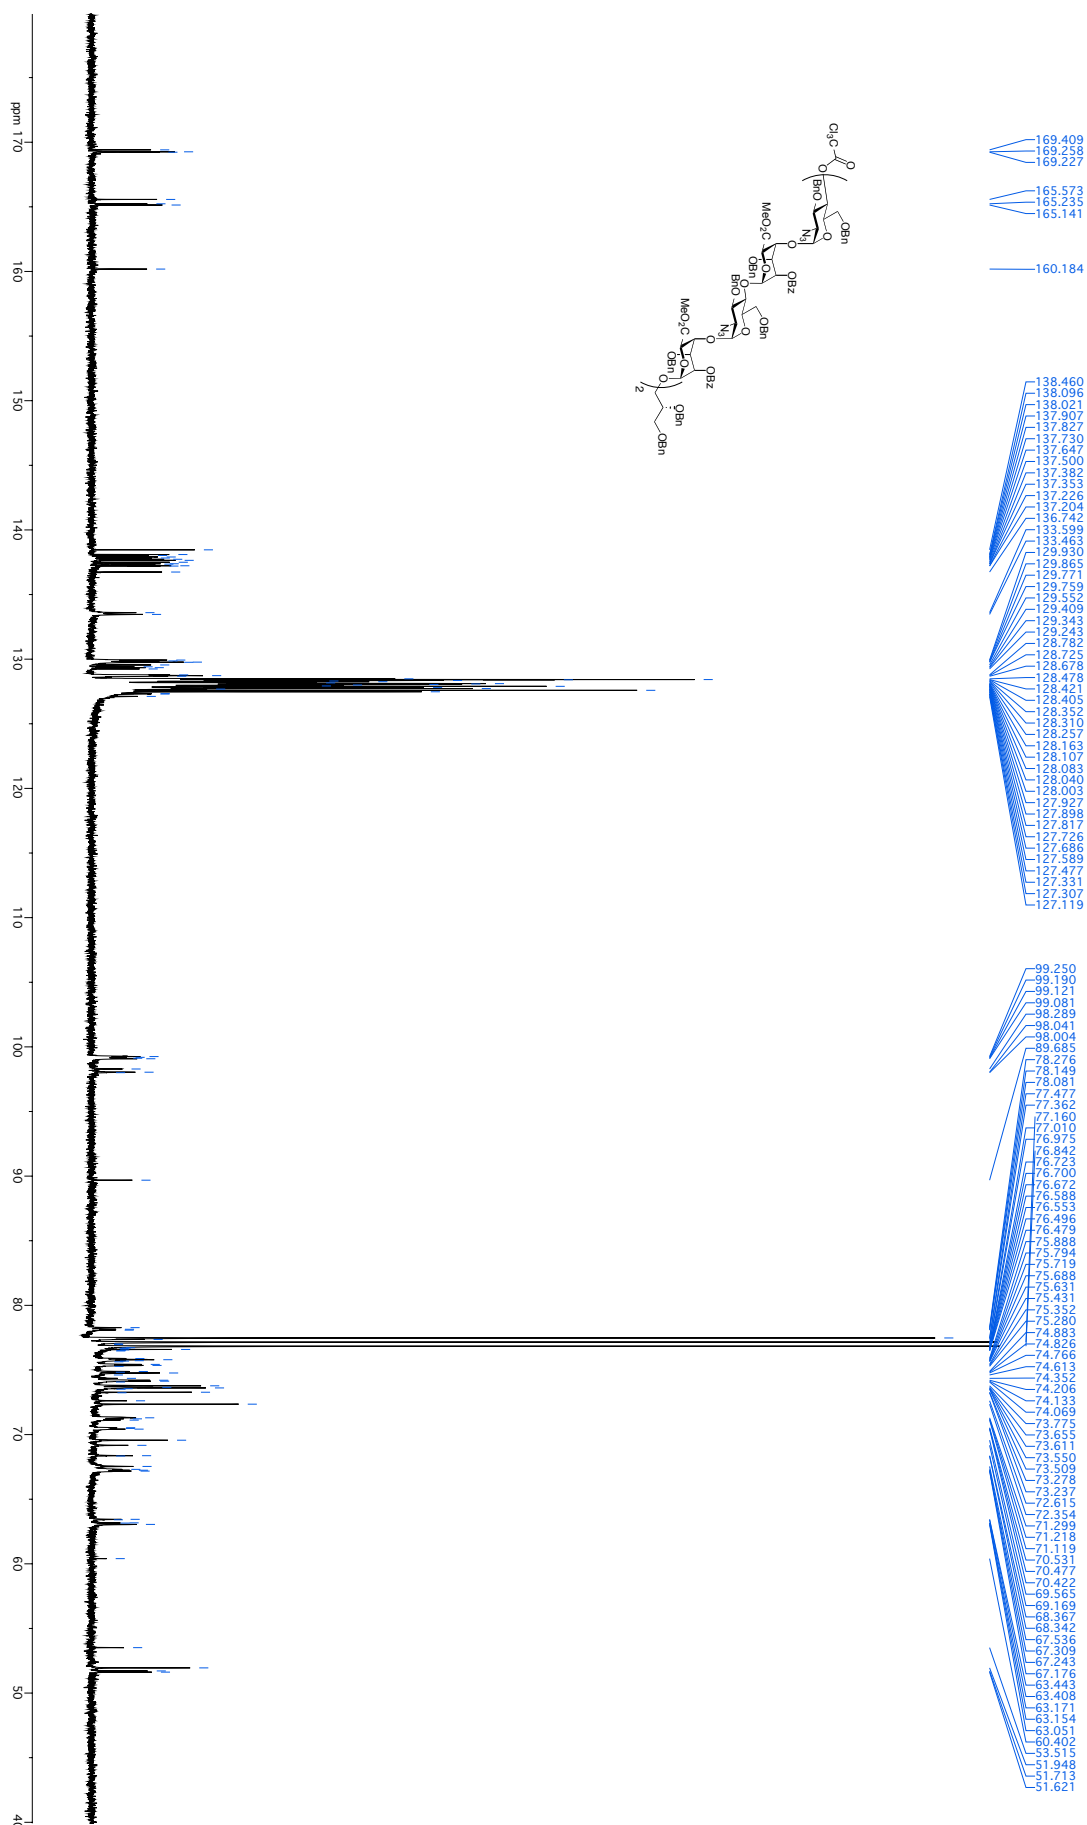

Supplementary Figure S43. <sup>13</sup>C NMR (100 MHz; CDCl<sub>3</sub>) spectrum for **11**



EPSRC National Mass Spectrometry Service Centre (NMSSC), Swansea  
<<MANGAR065-VM-MAP\_0001>> Voyager Spec #1=>AdvBC(64,0.5,0.1)=>NF0.7[BP = 3447.1, 2820]

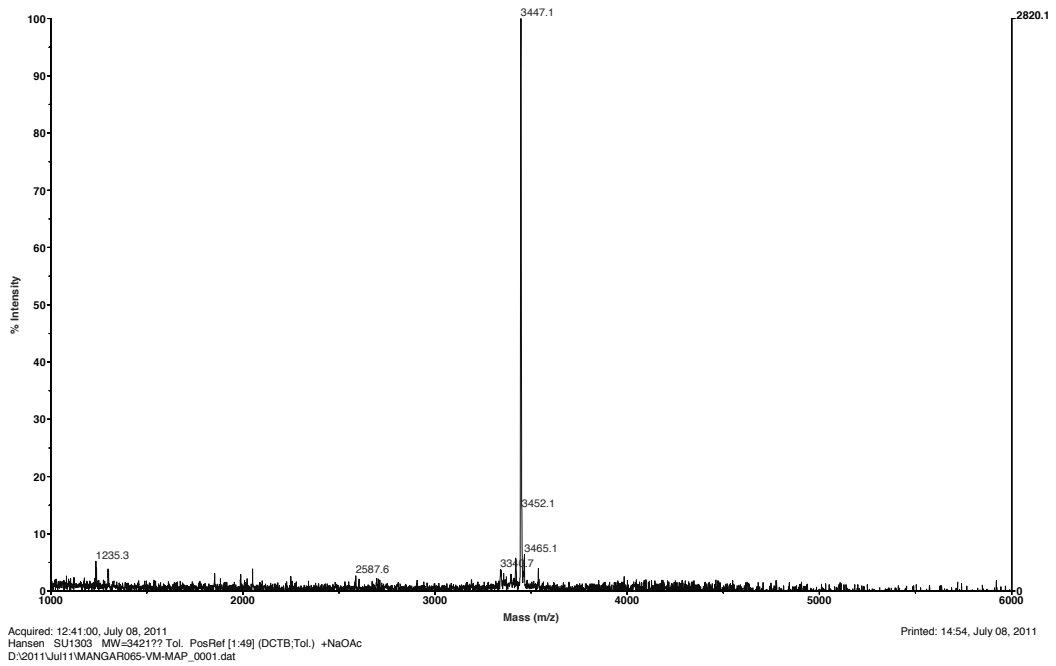

EPSRC National Mass Spectrometry Service Centre (NMSSC), Swansea  
ISO:C183H183N12O48Cl3 + (Na)

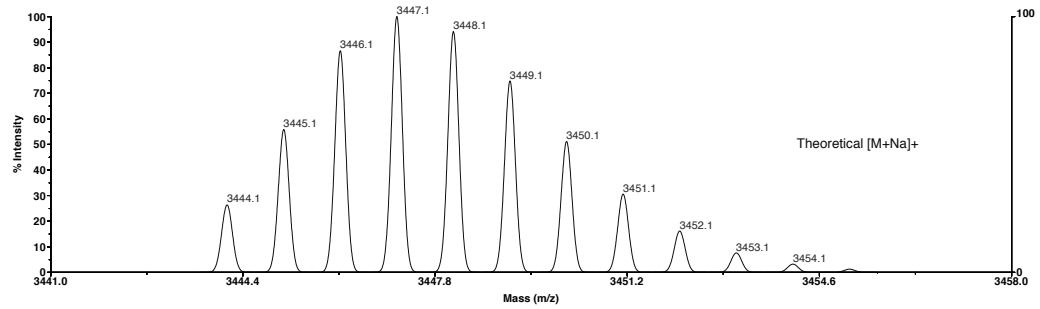

<<MANGAR065-VM-MAP\_0001>> Voyager Spec #1=>AdvBC(64,0.5,0.1)=>NF0.7[BP = 3447.1, 2820]

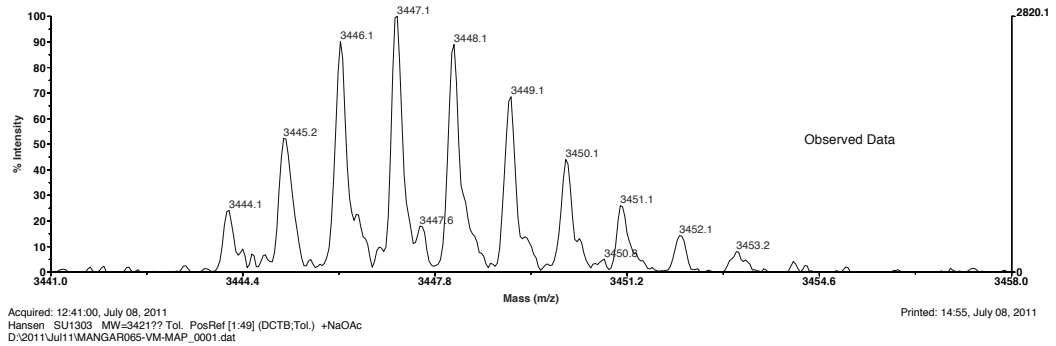

Supplementary Figure S44. MALDI-TOF MS spectrum for 11

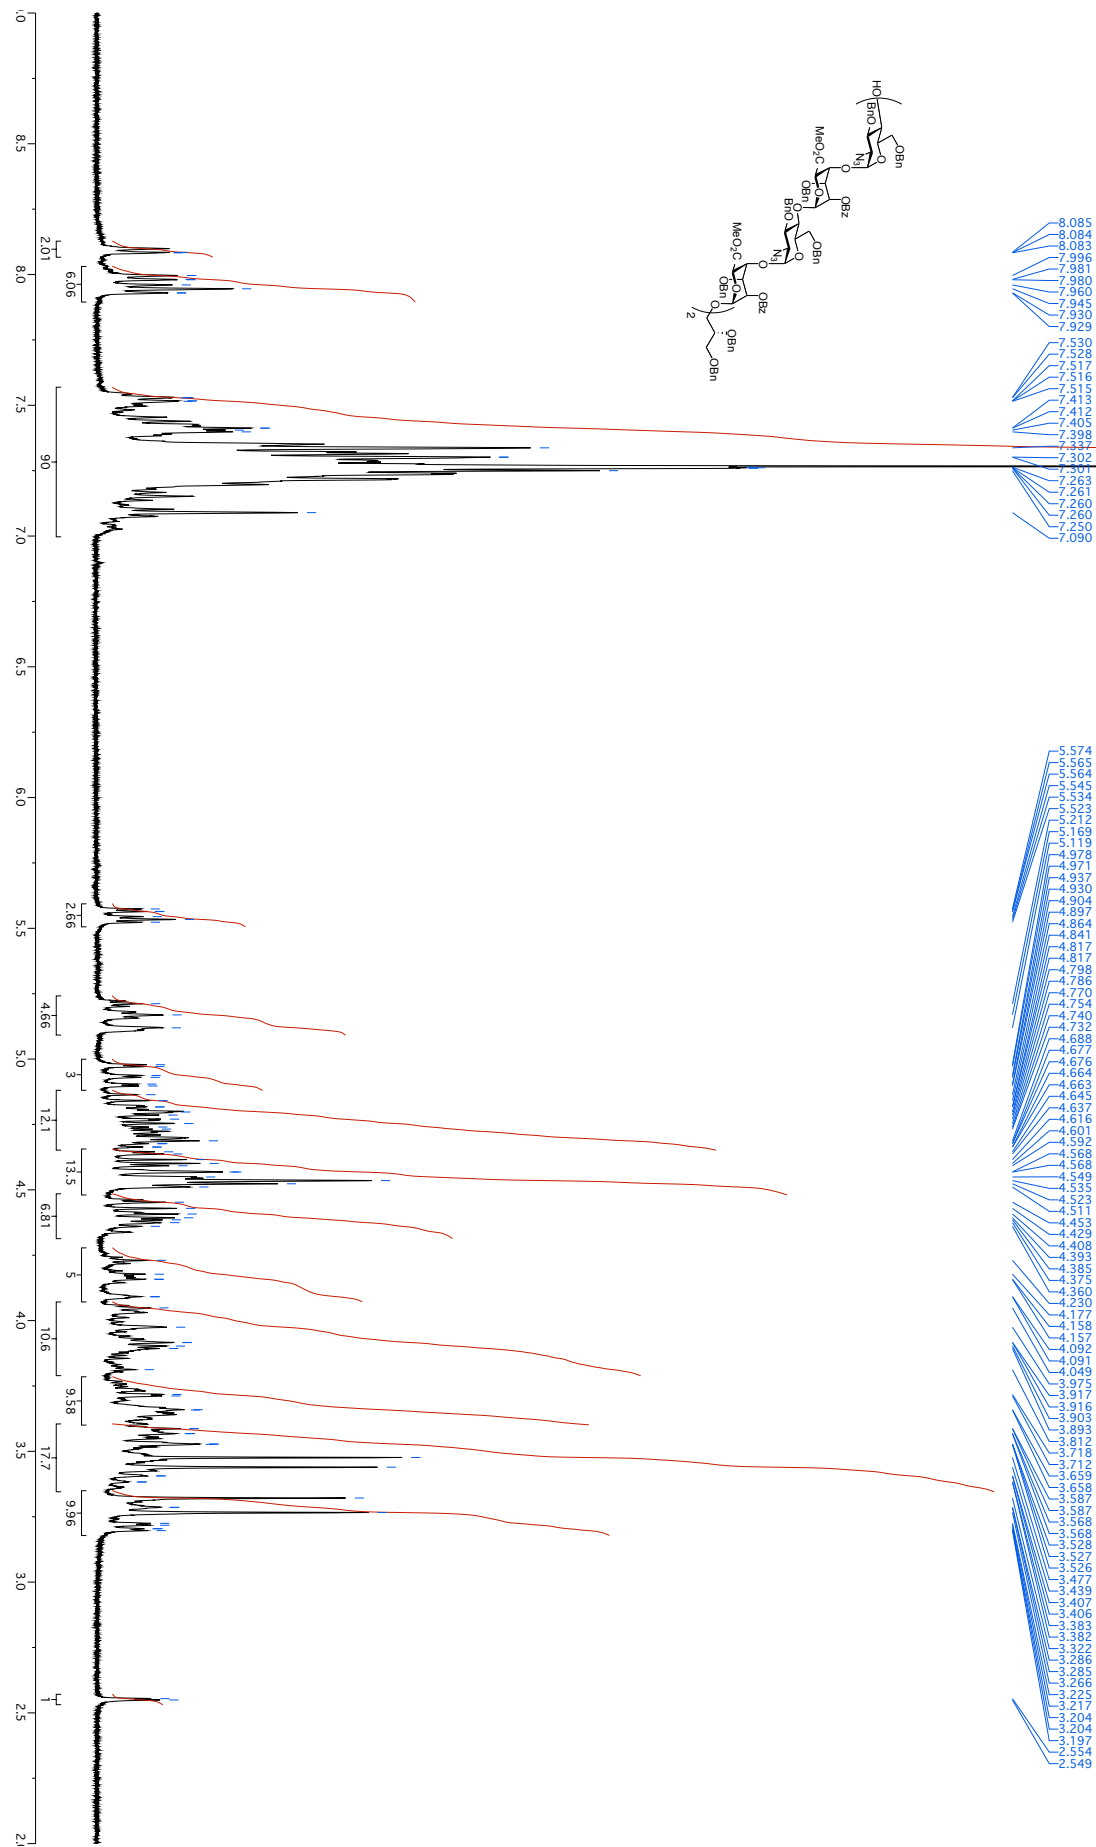

Supplementary Figure S45. <sup>1</sup>H NMR (500 MHz; CDCl<sub>3</sub>) spectrum for **12**

SU1294D1

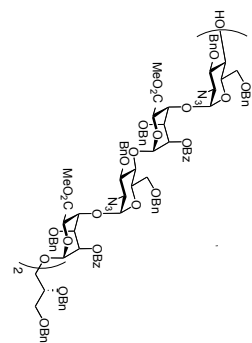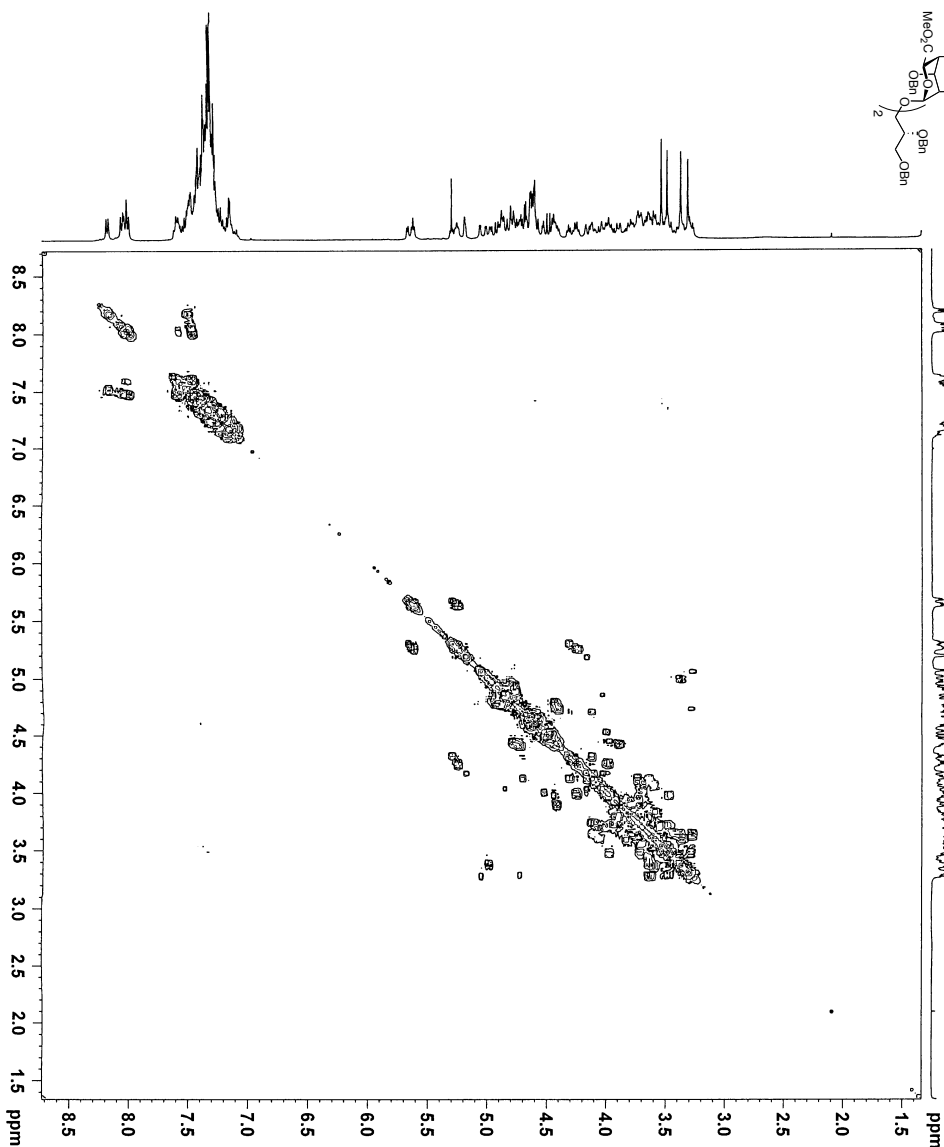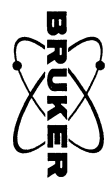

```

Current Data Parameters
NAME      SU1294D1
EXPNO     1
PROCNO    1
Date_     20100531
Time      20:27
INSTRUM   spect
PROBHD    5 mm Multinuc1
PULPROG   cosypprf
SOLVENT   CDCl3
NS         1
DS         8
SWH        295.083 Hz
F2         147.542 MHz
AQ         0.3465716 sec
RG         16
DM         169.200 usec
TE         295.2 K
dD         0.00000300 sec
d13        1.31247304 sec
D13        0.00000400 sec
DELTA     0.00000000 sec
IN0        0.00038840 sec

===== CHANNEL f1 =====
NUC1      13C
P0         10.00 usec
P1         10.00 usec
PL1        -0.10 dB
SFO1      400.1320130 MHz

===== GRADIENT CHANNEL =====
GRNAM1    SINE_100
GRNAM2    SINE_100
GPRG1     10.00 %
GPRG2     10.00 %
PI6        1000.00 usec

F1 - Acquisition parameters
NUC1      13C
TD         128
SFO1      400.132 MHz
SF02      23.086584 Hz
FIDRES    7.282 ppm
RMODE     0

F2 - Processing parameters
SI         32768
SF         400.130000 MHz
WDW        SSB
SSB        0
LB         0.00 Hz
GB         0
PC         1.40

F1 - Processing parameters
SI         1024
SF         400.130000 MHz
WDW        SSB
SSB        0
LB         0.00 Hz
GB         0
  
```

Supplementary Figure S46. COSY NMR spectrum for 12

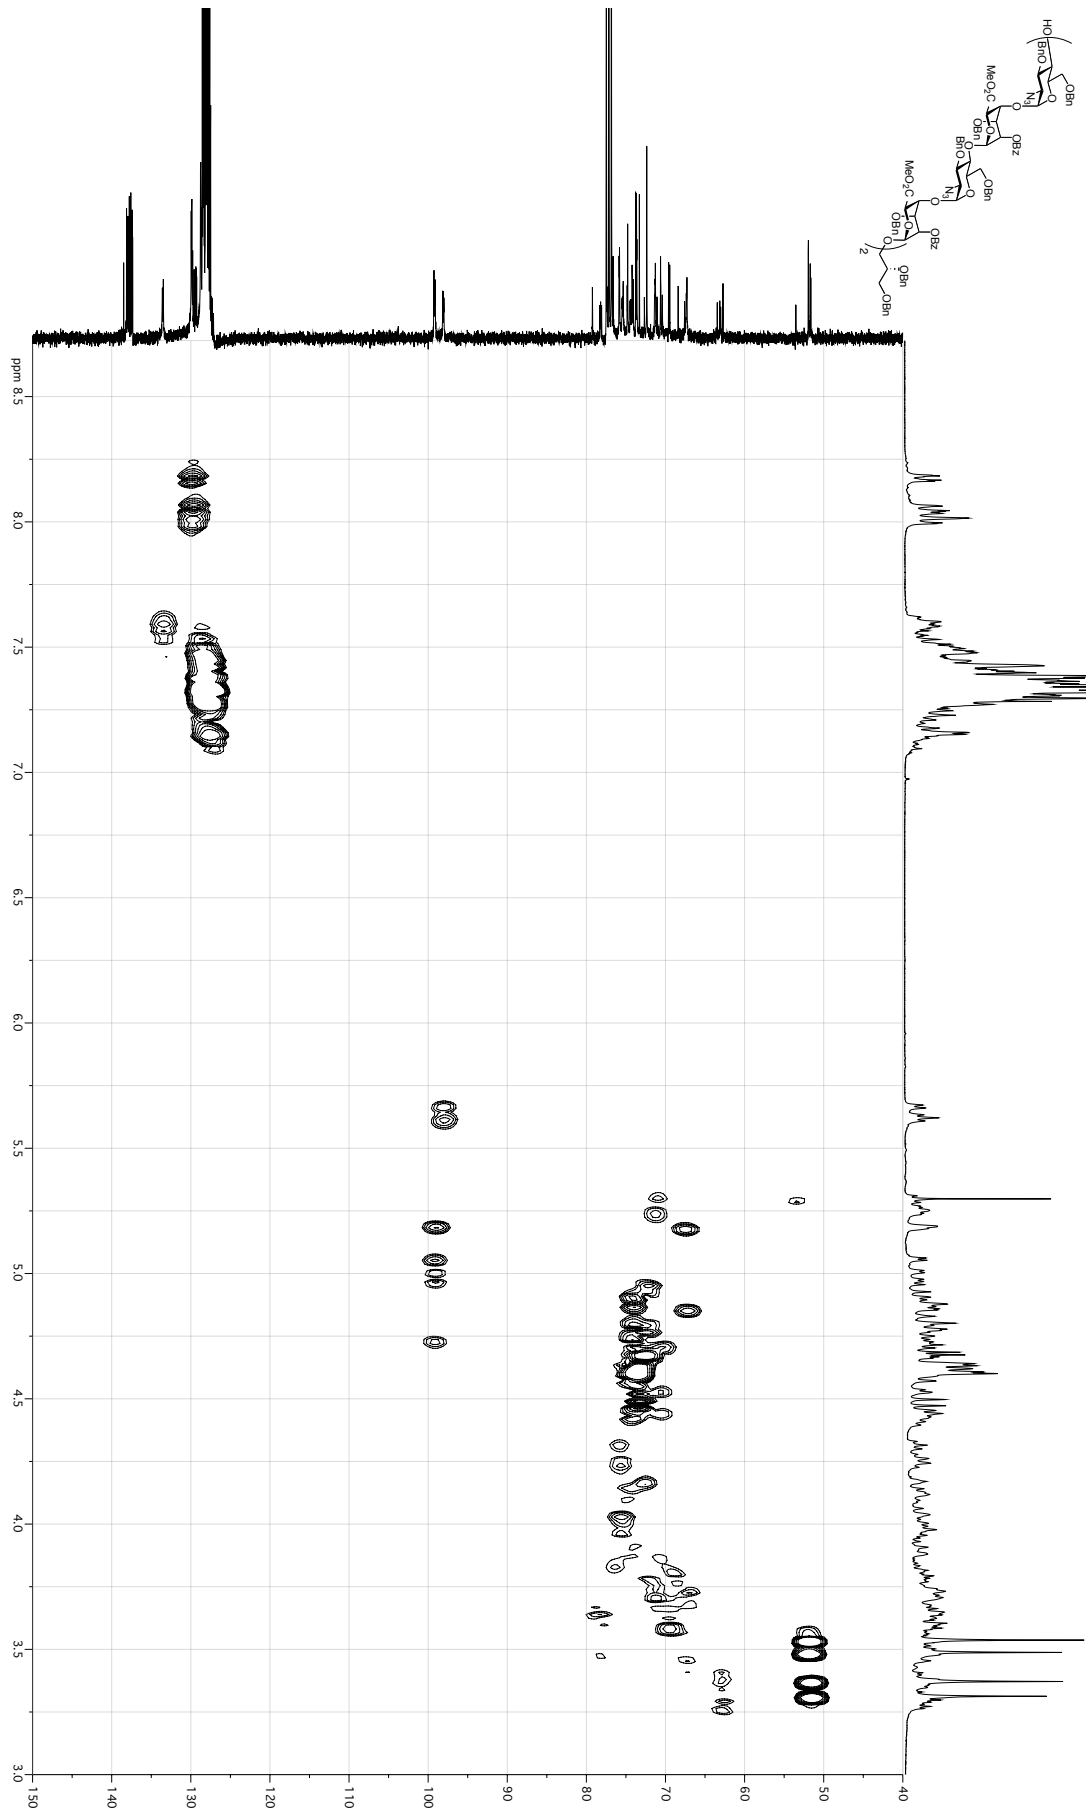

Supplementary Figure S47. HMQC NMR spectrum for 12

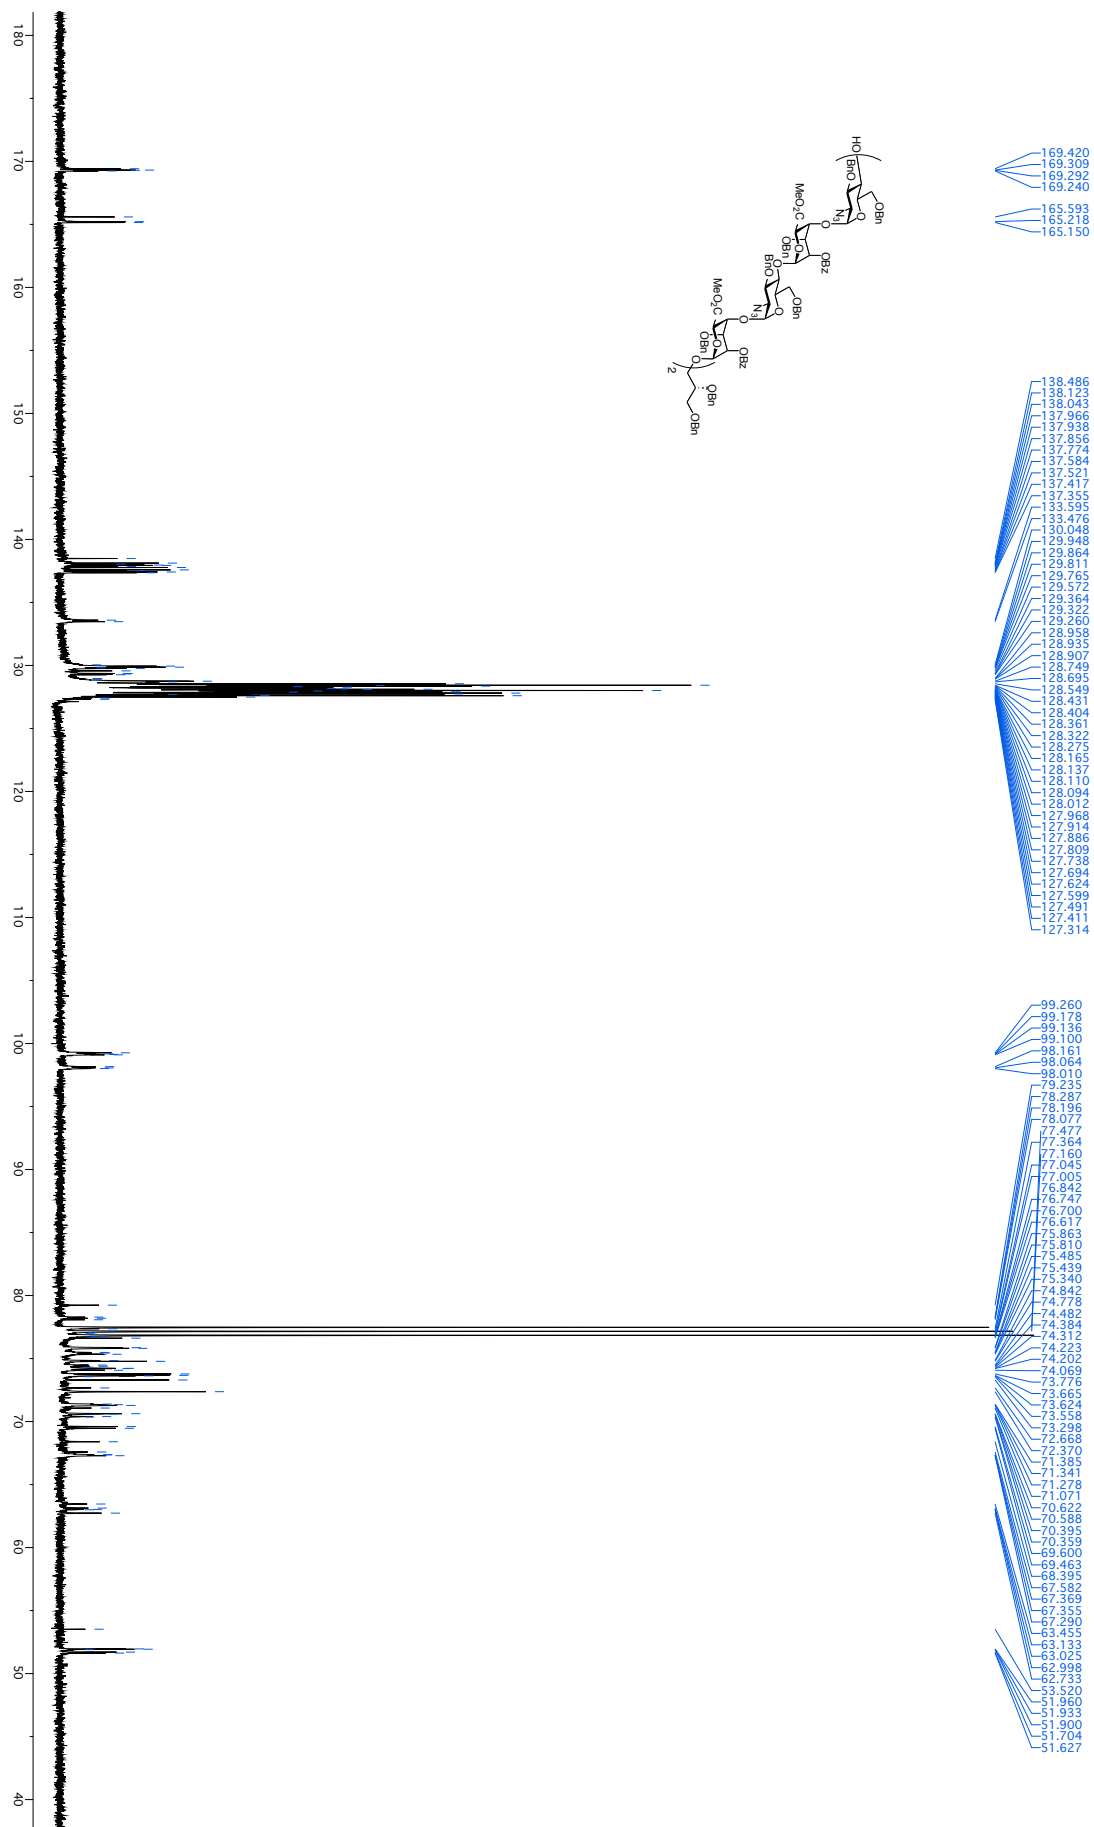

Supplementary Figure S48. HMQC NMR spectrum for **12** <sup>13</sup>C NMR (100 MHz; CDCl<sub>3</sub>) spectrum for **12**

EPSRC National Mass Spectrometry Service Centre (NMSSC), Swansea  
<<MANGAR066-VM-MAP\_0001>> Voyager Spec #1=>AdvBC(64,0.5,0.1)=>NF0.7[BP = 3301.2, 2043]

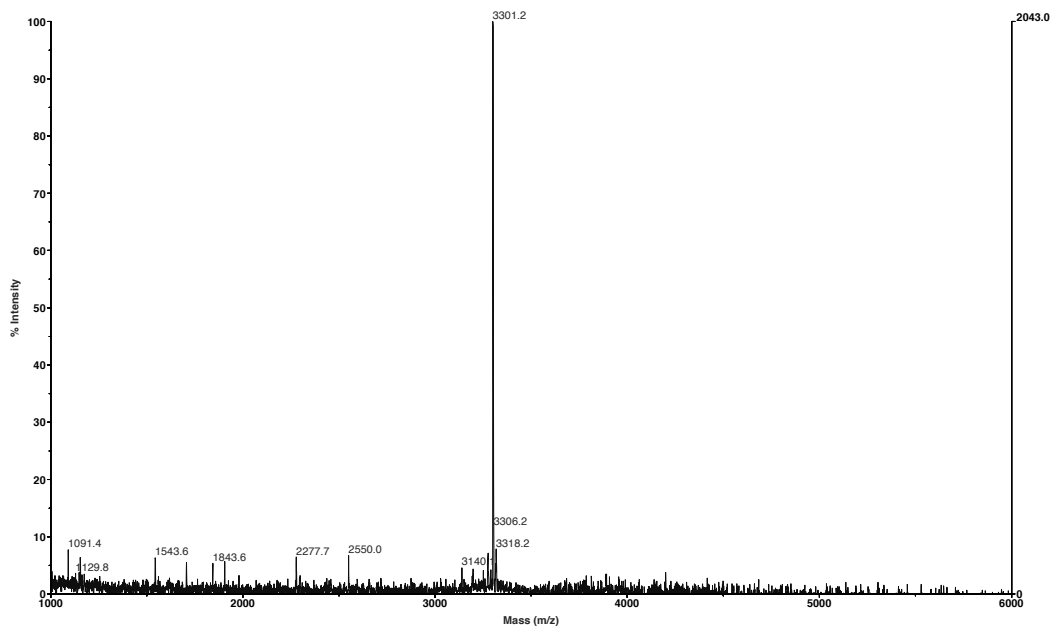

Acquired: 12:49:00, July 08, 2011  
Hansen SU1304 MW=3277?? Tol. PosRef [1:49] (DCTB;Tol.) +NaOAc  
D:\2011\Jul11\MANGAR066-VM-MAP\_0001.dat

Printed: 15:03, July 08, 2011

EPSRC National Mass Spectrometry Service Centre (NMSSC), Swansea  
ISO:C181H184N12O47 + (Na)<sup>1</sup>

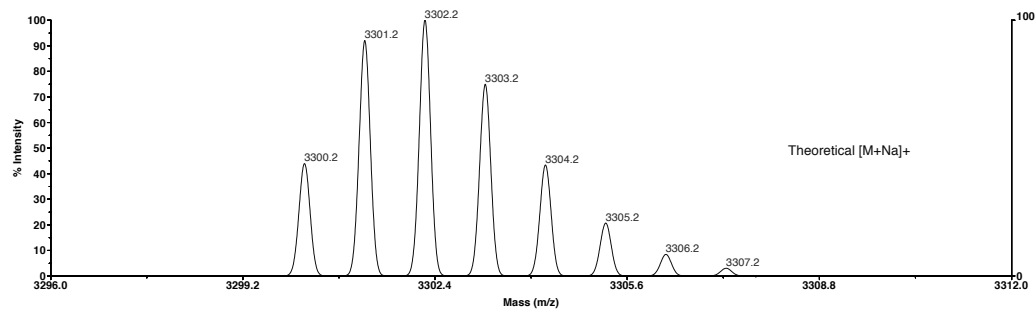

<<MANGAR066-VM-MAP\_0001>> Voyager Spec #1=>AdvBC(64,0.5,0.1)=>NF0.7[BP = 3301.2, 2043]

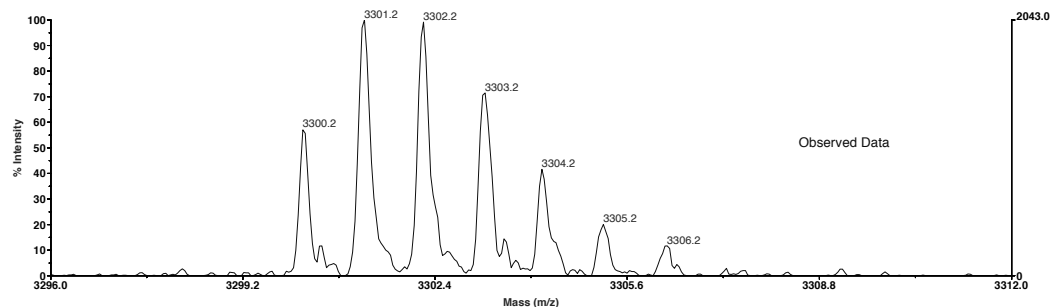

Acquired: 12:49:00, July 08, 2011  
Hansen SU1304 MW=3277?? Tol. PosRef [1:49] (DCTB;Tol.) +NaOAc  
D:\2011\Jul11\MANGAR066-VM-MAP\_0001.dat

Printed: 15:04, July 08, 2011

Supplementary Figure S49. MALDI-TOF MS spectrum for 12

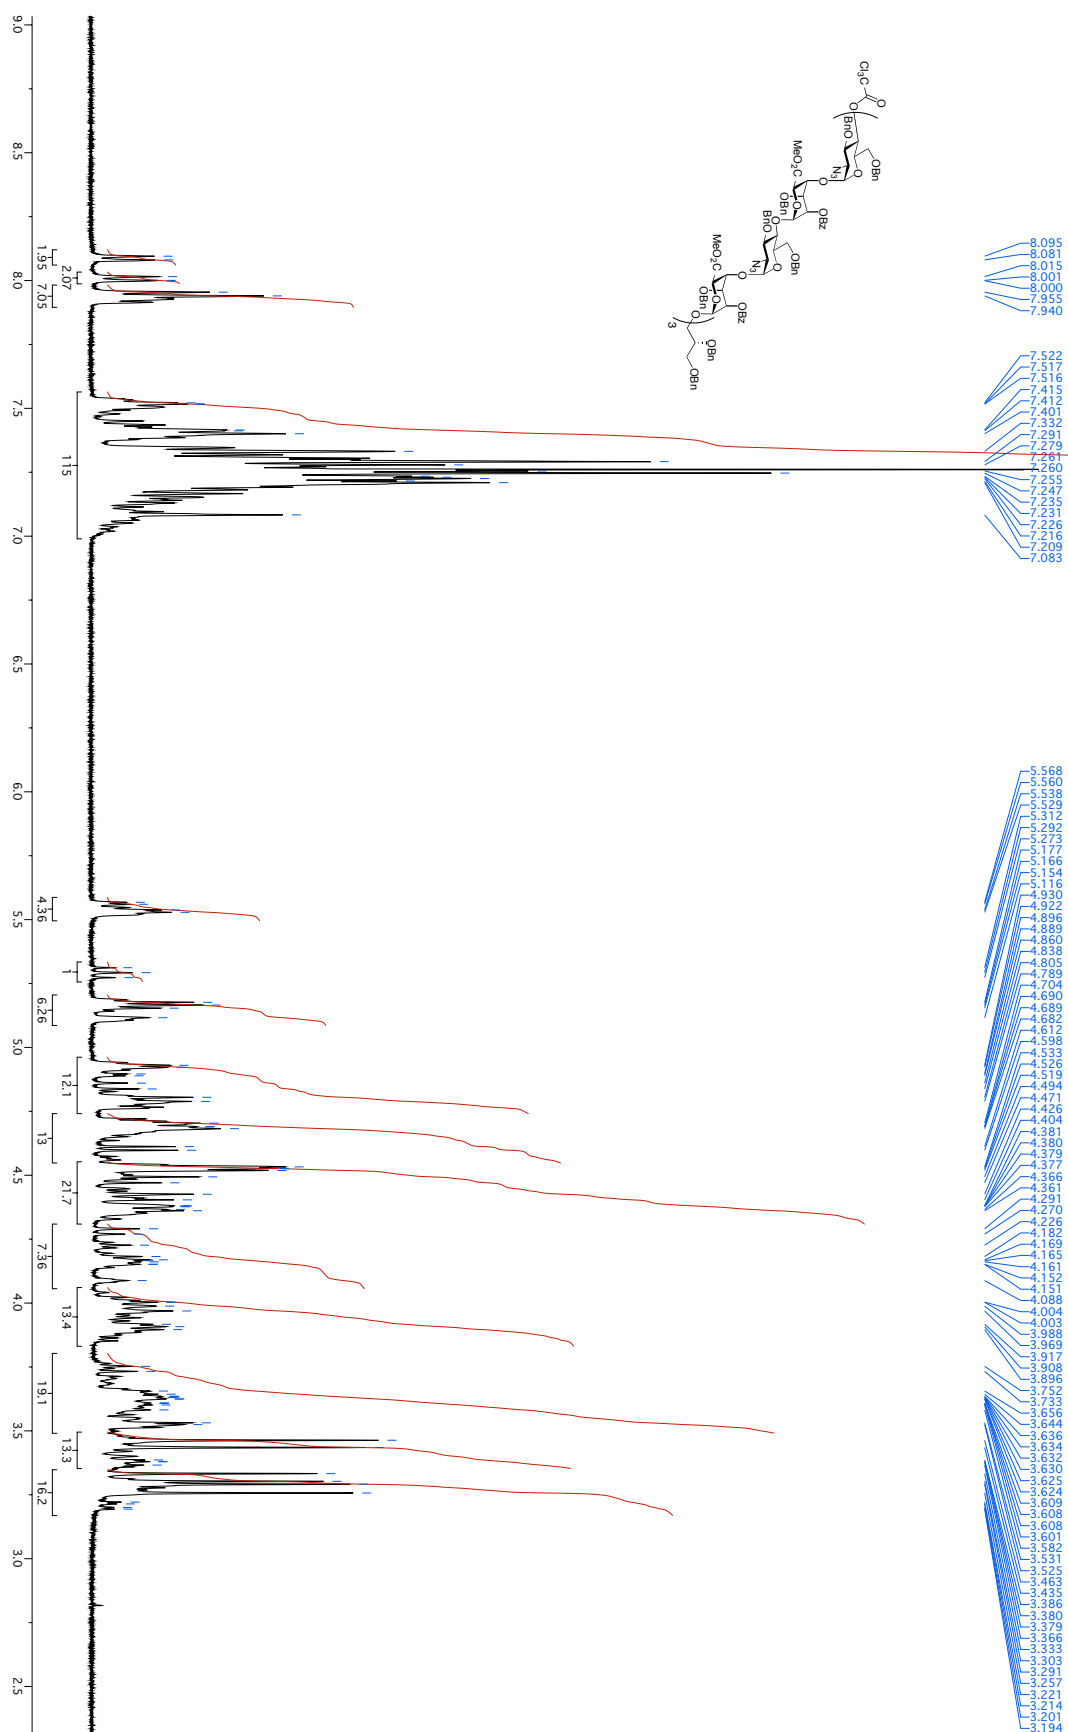

Supplementary Figure S50.  $^1\text{H}$  NMR (500 MHz;  $\text{CDCl}_3$ ) spectrum for **13**

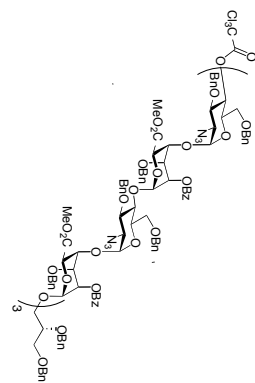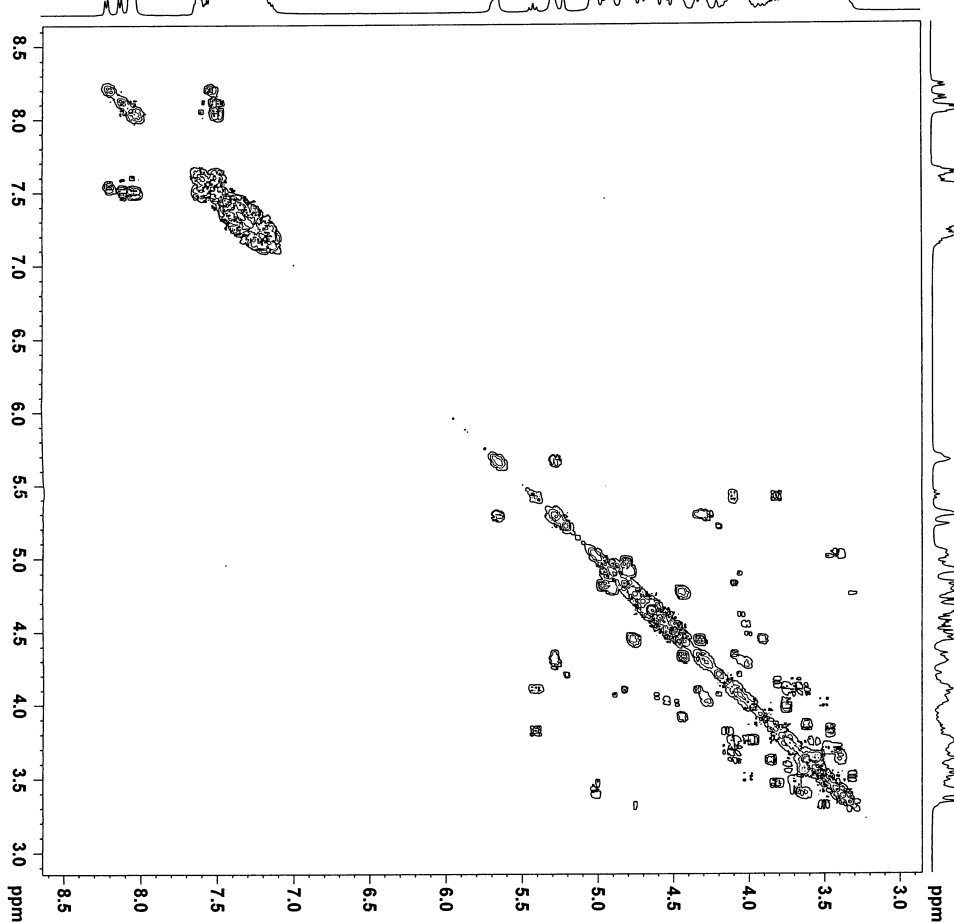

Current Data Parameters  
 Name: 20100608  
 EXPNO: 1  
 PROCNO: 1  
 P2 - Acquisition Parameters  
 Date\_ Time: 20100608 0:20  
 INSTRUM: spect  
 PROBRD: 5 mm MULTISQ  
 PULPROG: zgpg30  
 TD: 655376  
 SOLVENT: CDCl3  
 NS: 1  
 DS: 1  
 SWH: 2314.815 Hz  
 FIDRES: 1.130281 Hz  
 AQ: 0.4424180 sec  
 RG: 327.5  
 ACQ: 216.013 usec  
 DE: 6.00 usec  
 TE: 294.2 K  
 D0: 0.0000000 sec  
 d13: 0.0000000 sec  
 d16: 0.0002000 sec  
 INO: 0.00043200 sec  
 ===== CHANNEL f1 =====  
 NUC1: 1H  
 P0: 10.00 usec  
 P1: 10.00 usec  
 P2: 10.00 usec  
 SFO1: 400.1322955 MHz  
 ===== GRADIENT CHANNEL =====  
 GBRM1: SINE 100  
 GRNM1: SINE 100  
 GP21: 10.00 %  
 GP22: 10.00 %  
 P16: 1000.00 usec  
 F1 - Acquisition parameters  
 ND0: 1  
 TD: 128  
 FIDRES: 400.1322955 Hz  
 SW: 5.785 ppm  
 FWHM: 5.785 ppm  
 QF: 0  
 P2 - Processing parameters  
 SI: 1024  
 SF: 400.1300000 MHz  
 WDM: SINE  
 SSB: 0 Hz  
 GB: 0 Hz  
 PC: 1.40  
 F1 - Processing parameters  
 S: 655376  
 MC2: 1024  
 SF: 400.1300000 MHz  
 WDM: SINE  
 L8: 0.00 Hz  
 GB: 0

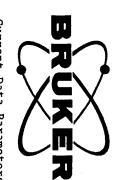

Supplementary Figure S51. COSY NMR spectrum for 13



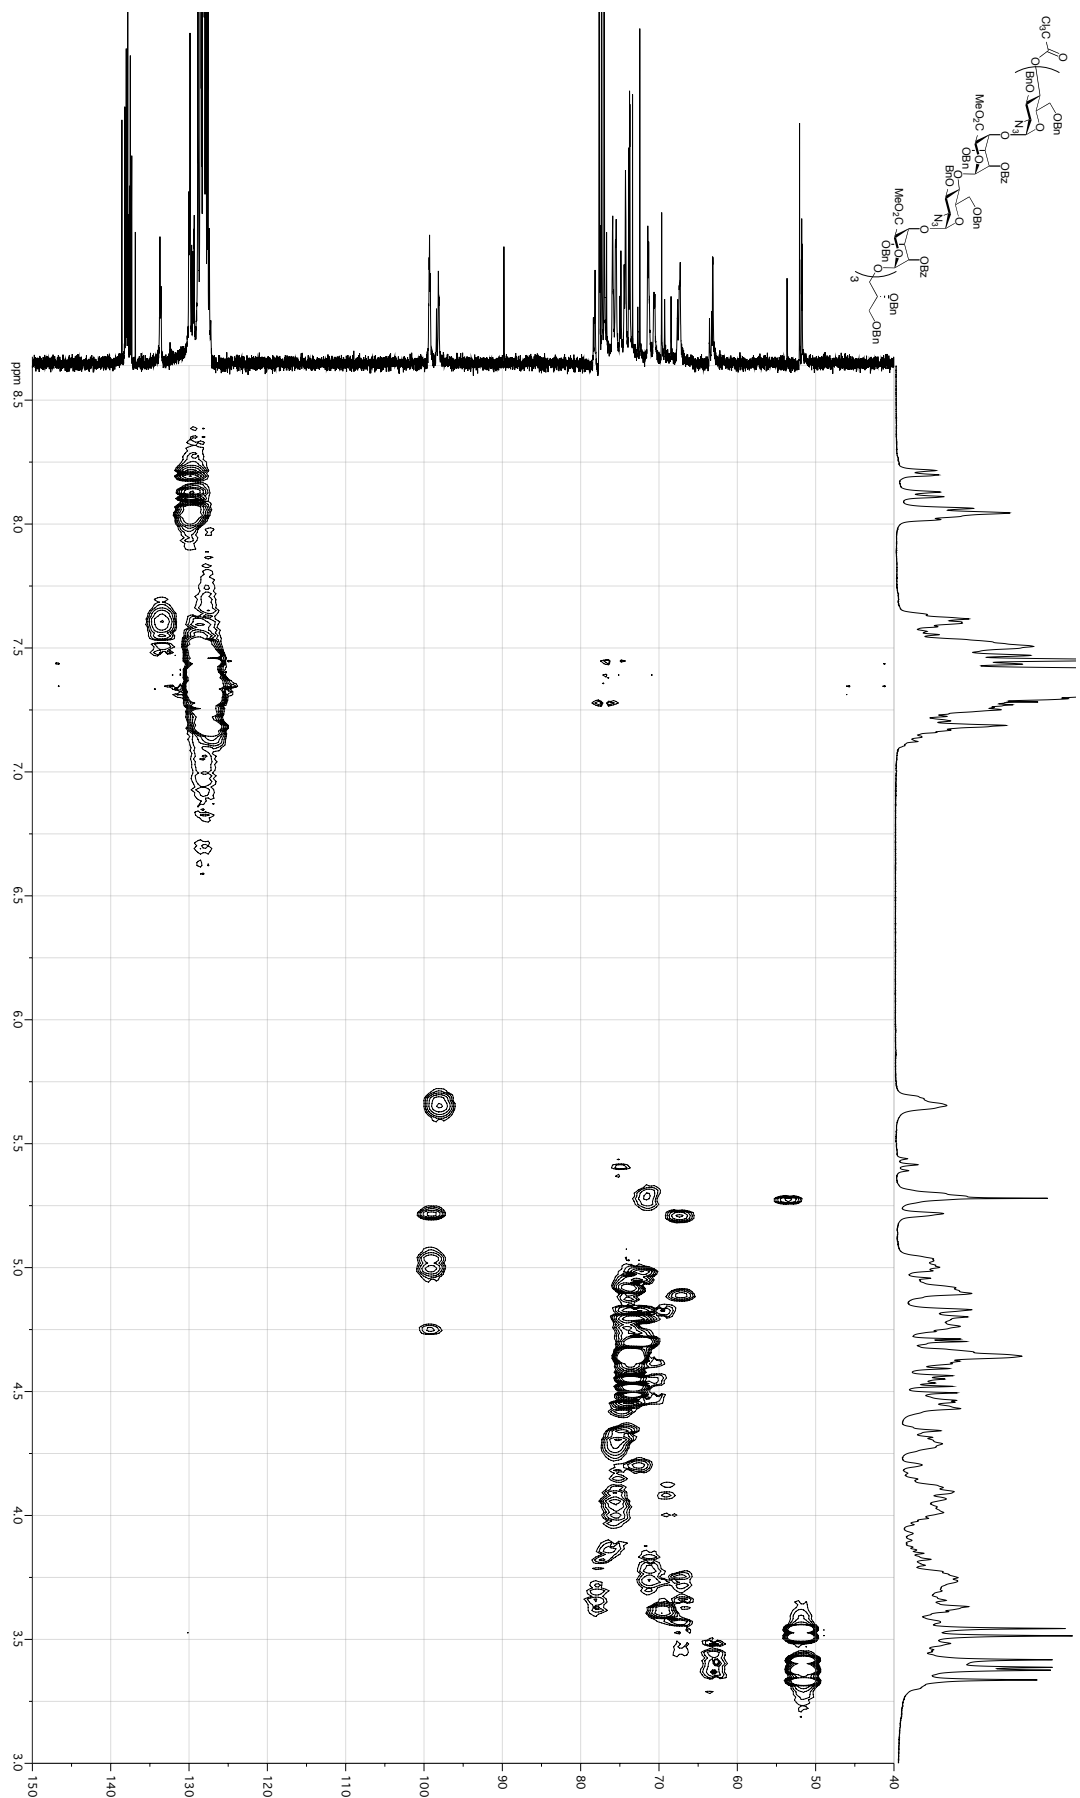

Supplementary Figure S52. HMQC NMR spectrum for 13

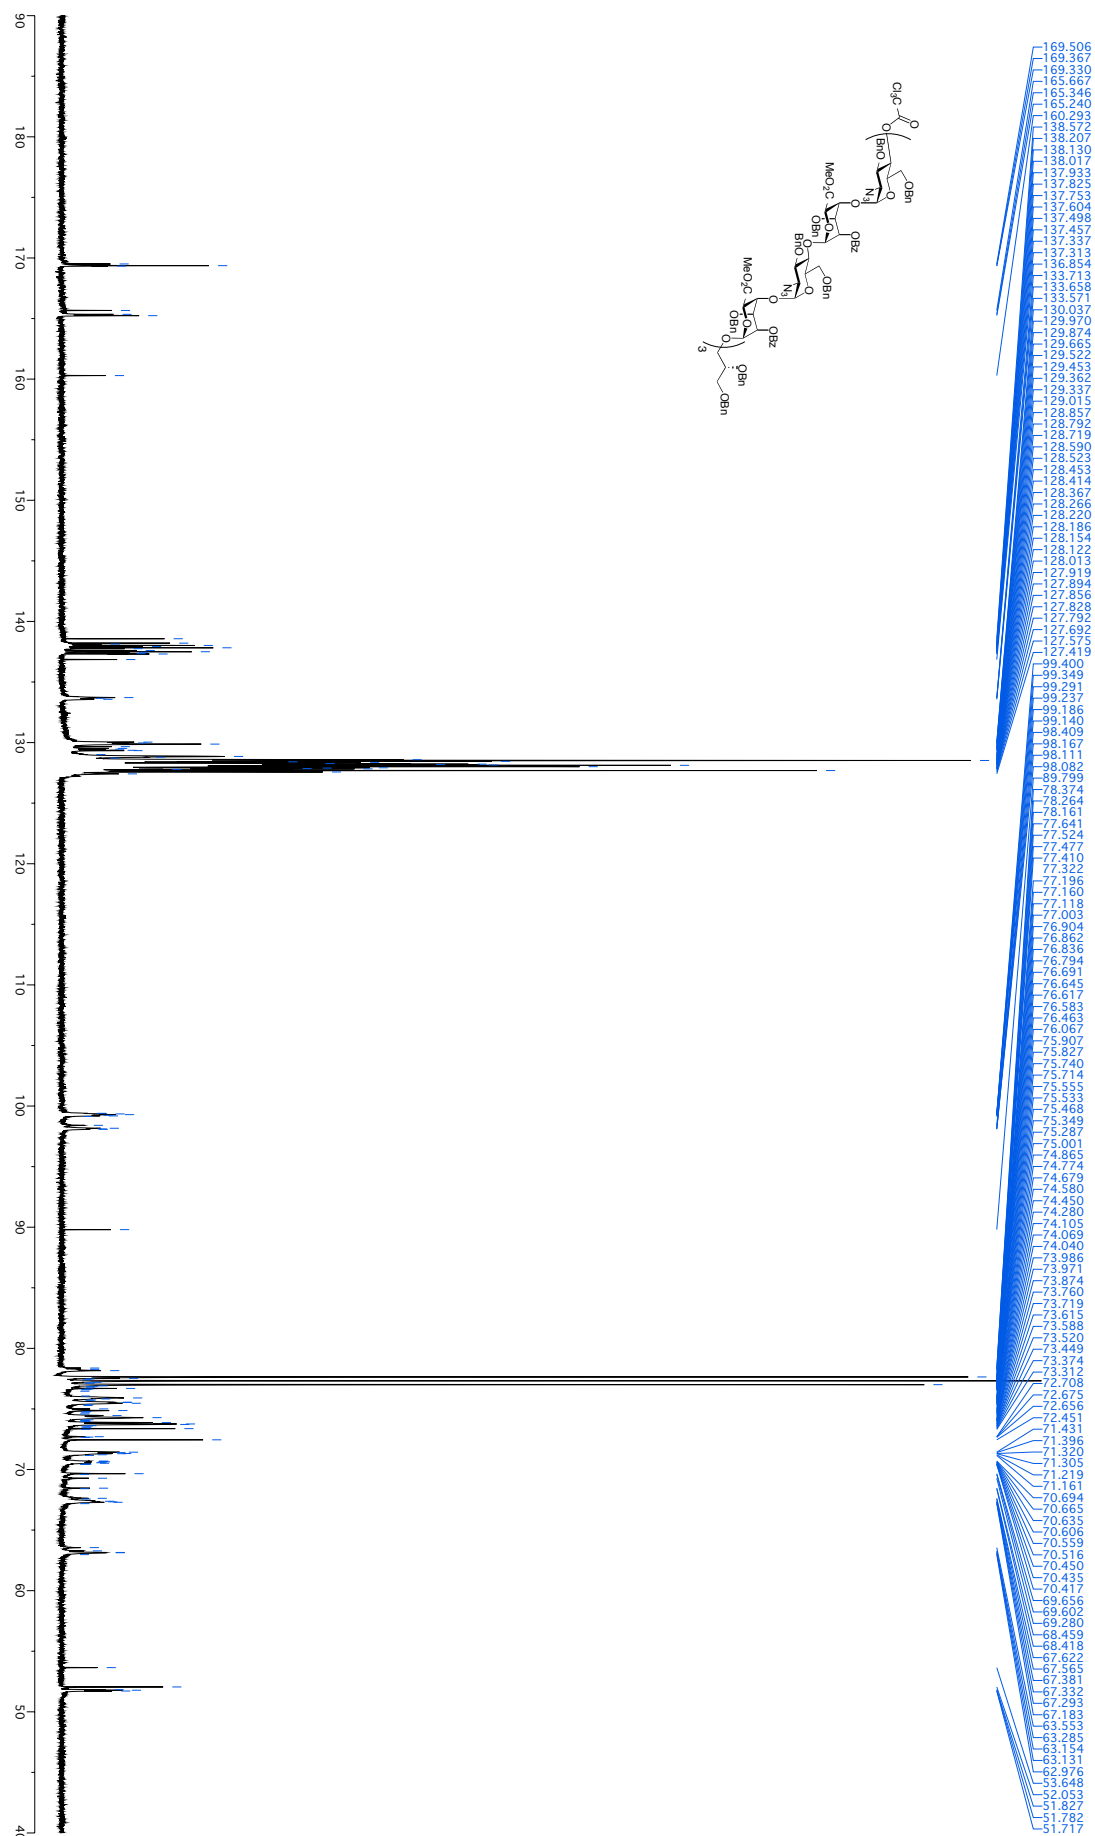

Supplementary Figure S53.  $^{13}\text{C}$  NMR (100 MHz;  $\text{CDCl}_3$ ) spectrum for **13**

EPSRC National Mass Spectrometry Service Centre (NMSSC), Swansea

<<MANGAR040\_0001>> Voyager Spec #1=>AdvBC(64,0.5,0.1)=>SM5[BP = 569.9, 4307]

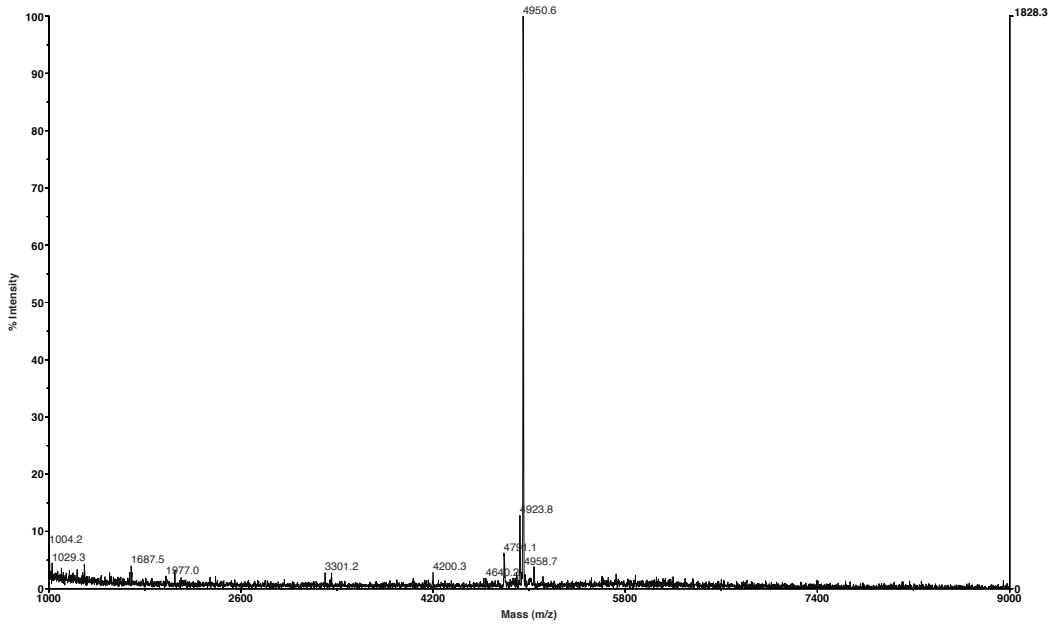

Acquired: 18:03:00, July 20, 2010  
Hansen SU1305 MW=4923? DCM PosRef [1:49] (DCTB:DCM) +NaOAc  
D:\2010\Jul10\MANGAR040\_0001.dat

Printed: 10:00, July 21, 2010

EPSRC National Mass Spectrometry Service Centre (NMSSC), Swansea

ISO:C265H265Cl3N18O70 + (Na)1

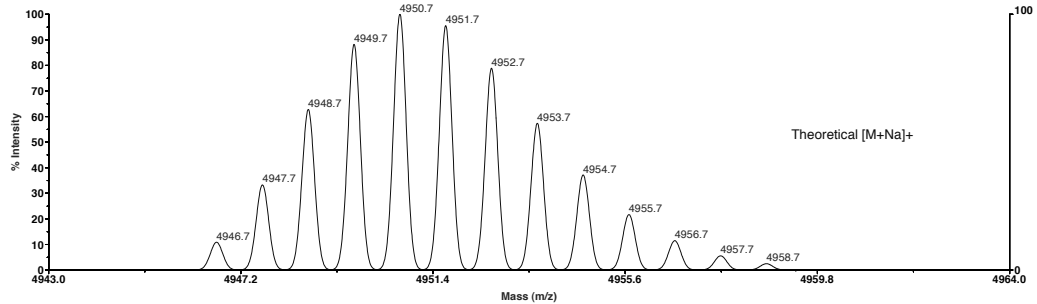

<<MANGAR040\_0001>> Voyager Spec #1=>AdvBC(64,0.5,0.1)=>SM5[BP = 569.9, 4307]

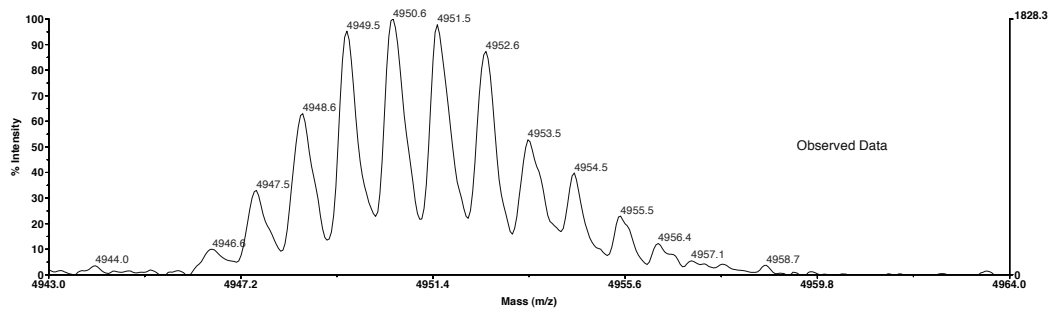

Acquired: 18:03:00, July 20, 2010  
Hansen SU1305 MW=4923? DCM PosRef [1:49] (DCTB:DCM) +NaOAc  
D:\2010\Jul10\MANGAR040\_0001.dat

Printed: 10:01, July 21, 2010

Supplementary Figure S54. MALDI-TOF MS spectrum for 13

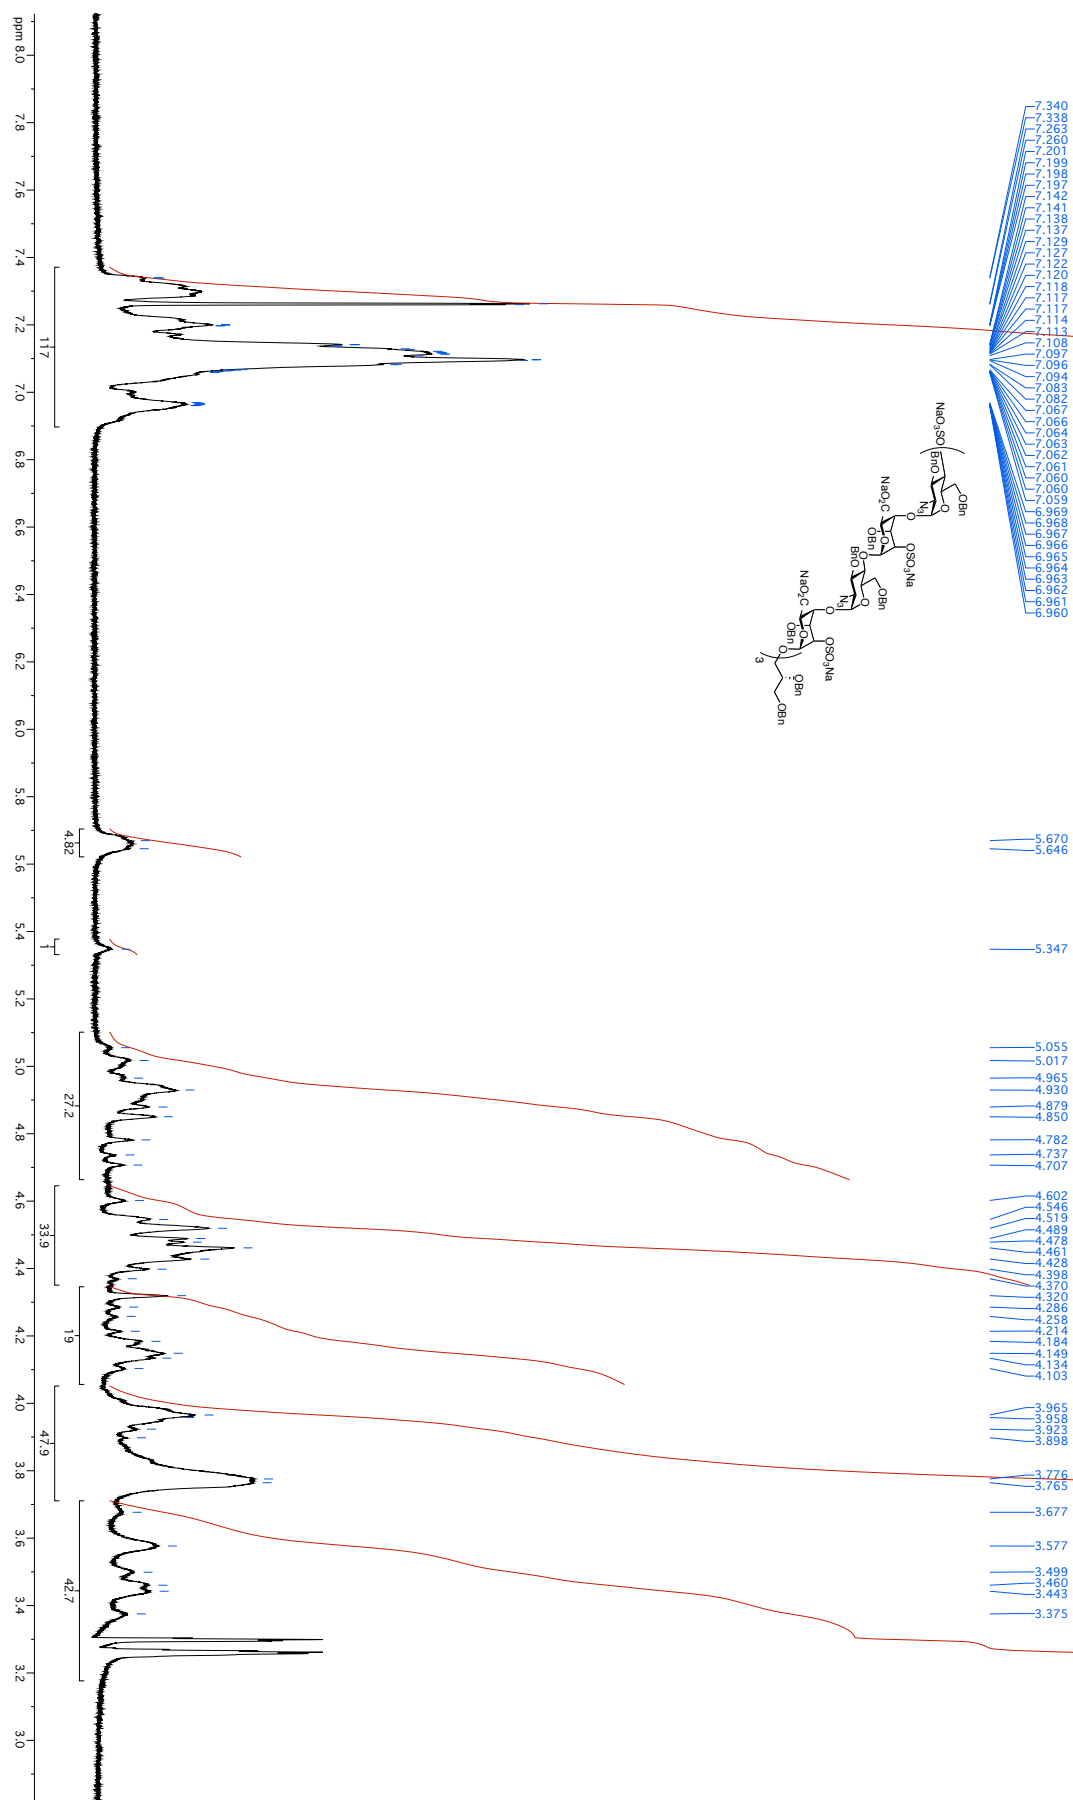

Supplementary Figure S55. <sup>1</sup>H NMR (400 MHz; CDCl<sub>3</sub>/CD<sub>3</sub>OD 10:1) spectrum for B

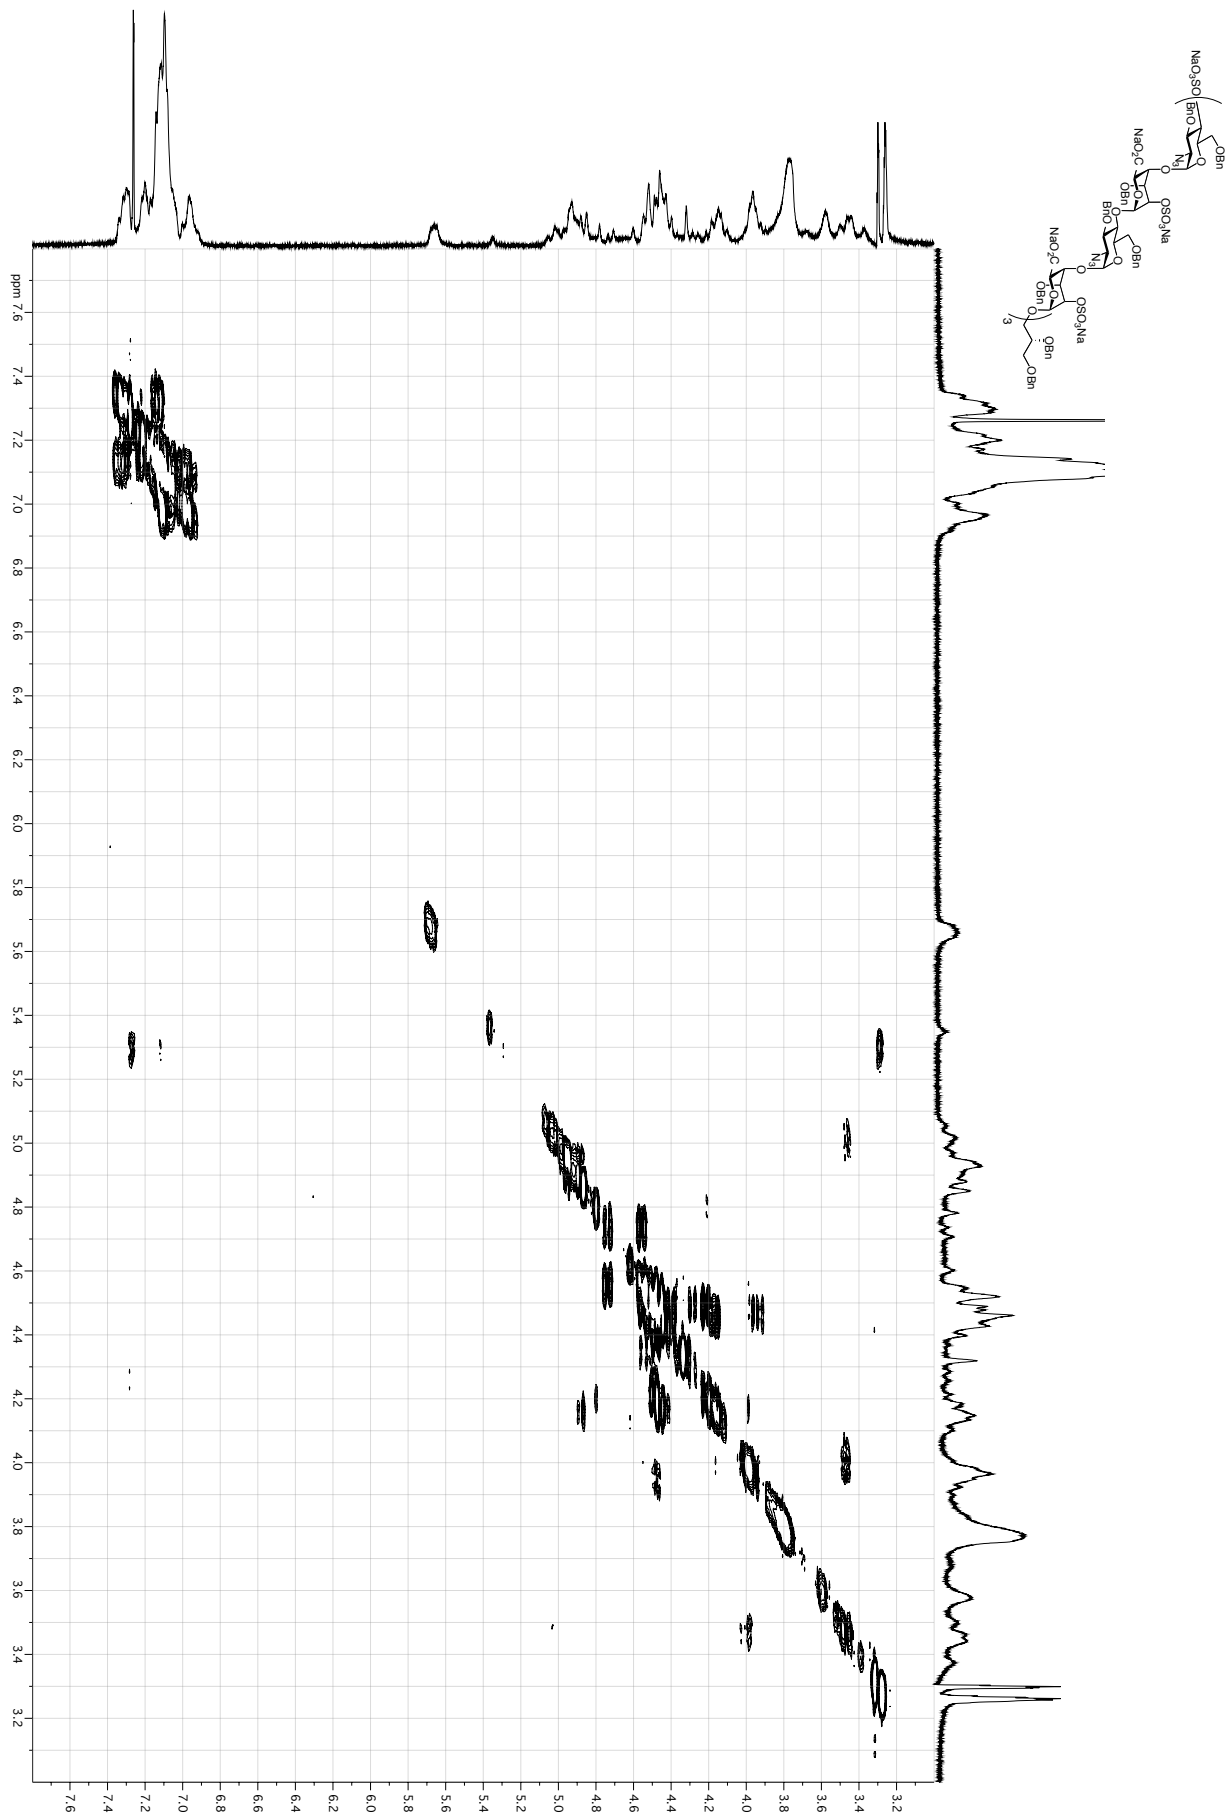

**Supplementary Figure S56.** COSY NMR spectrum for **B**

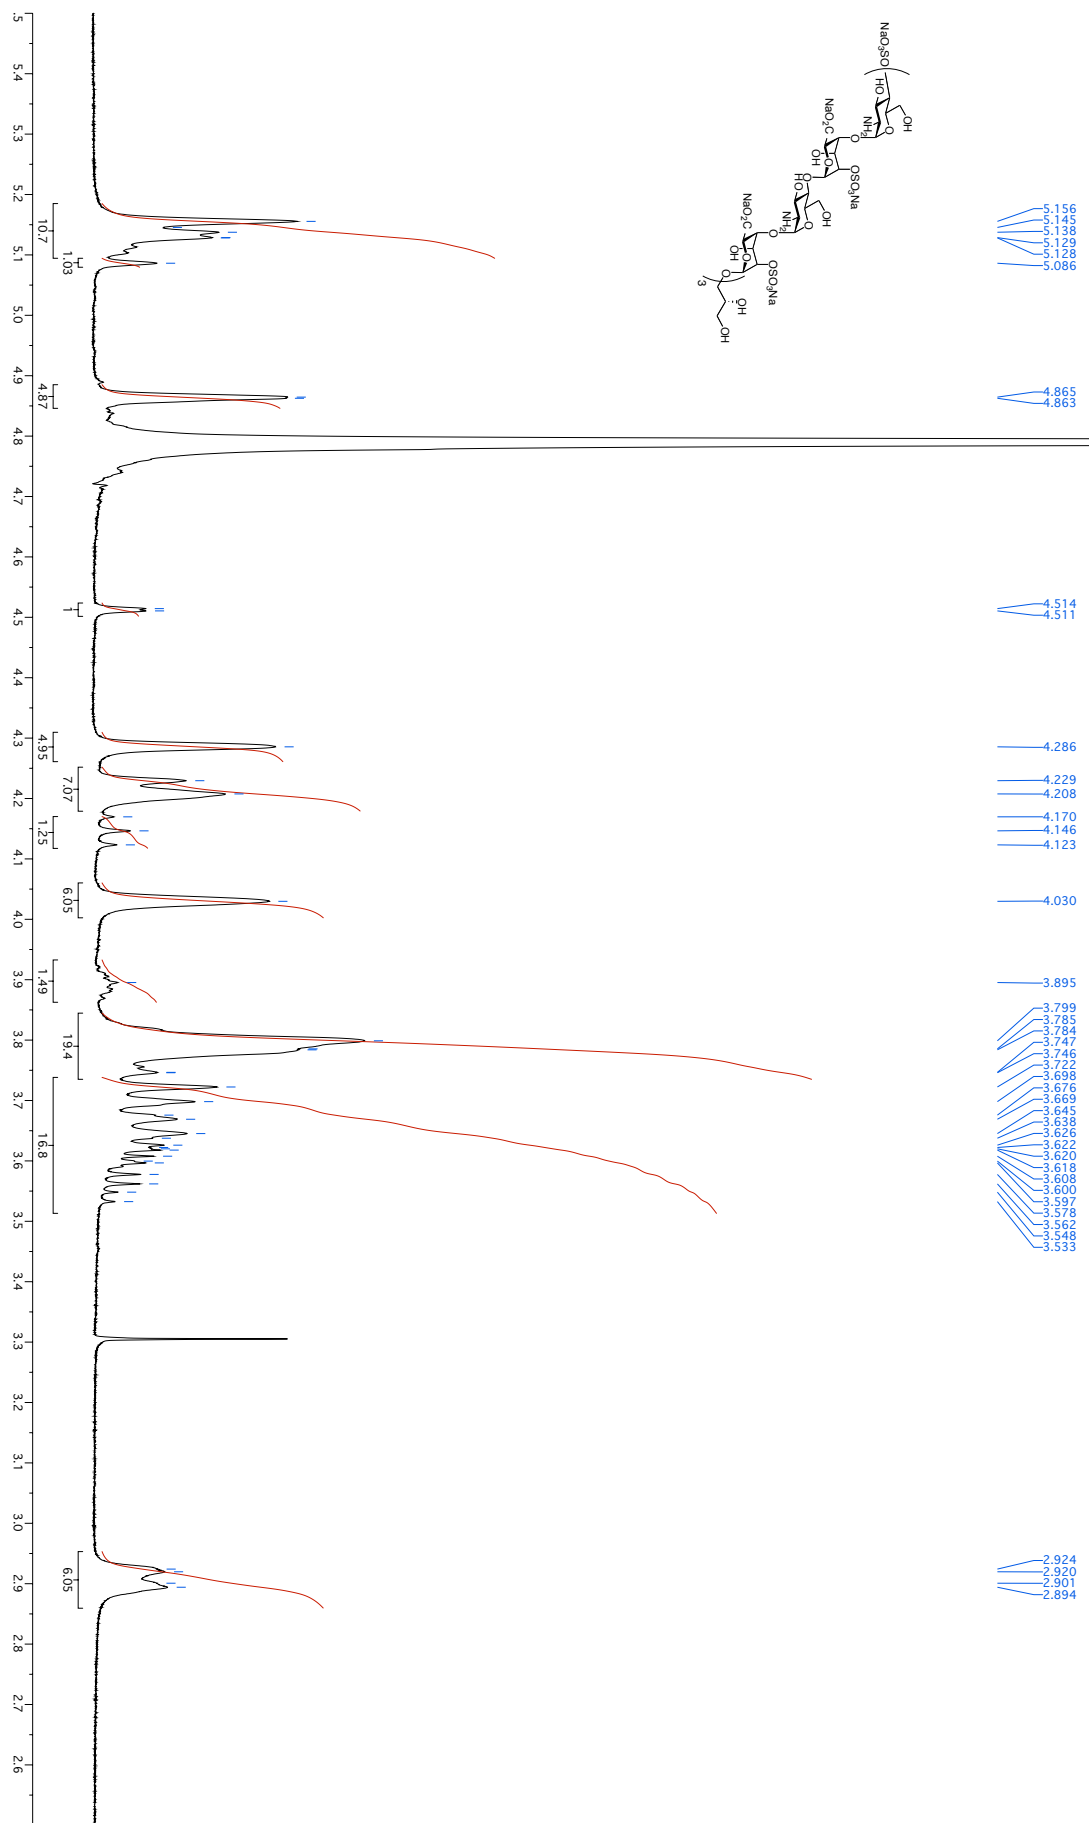

**Supplementary Figure S57.** <sup>1</sup>H NMR (400 MHz; D<sub>2</sub>O) spectrum for dodecasaccharide NH<sub>2</sub> intermediate C

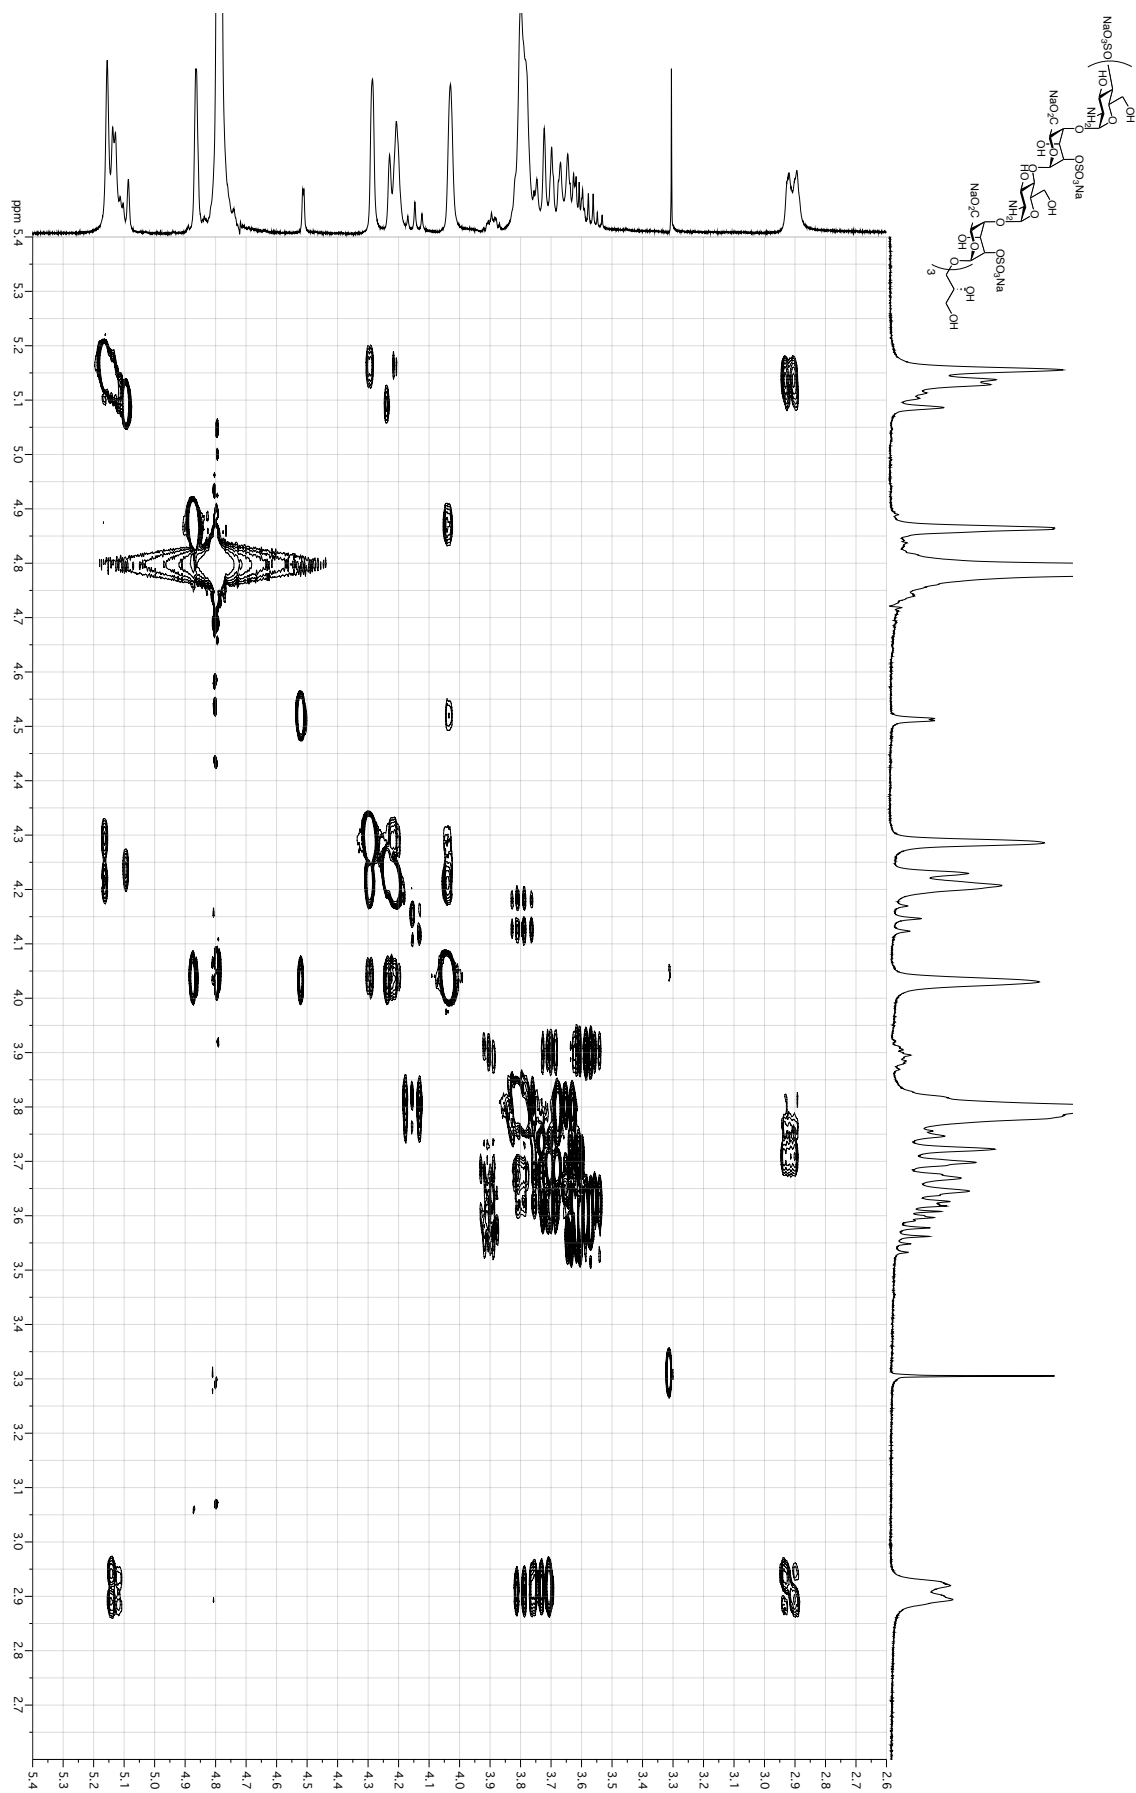

Supplementary Figure S58. COSY NMR spectrum for dodecasaccharide NH<sub>2</sub> intermediate C

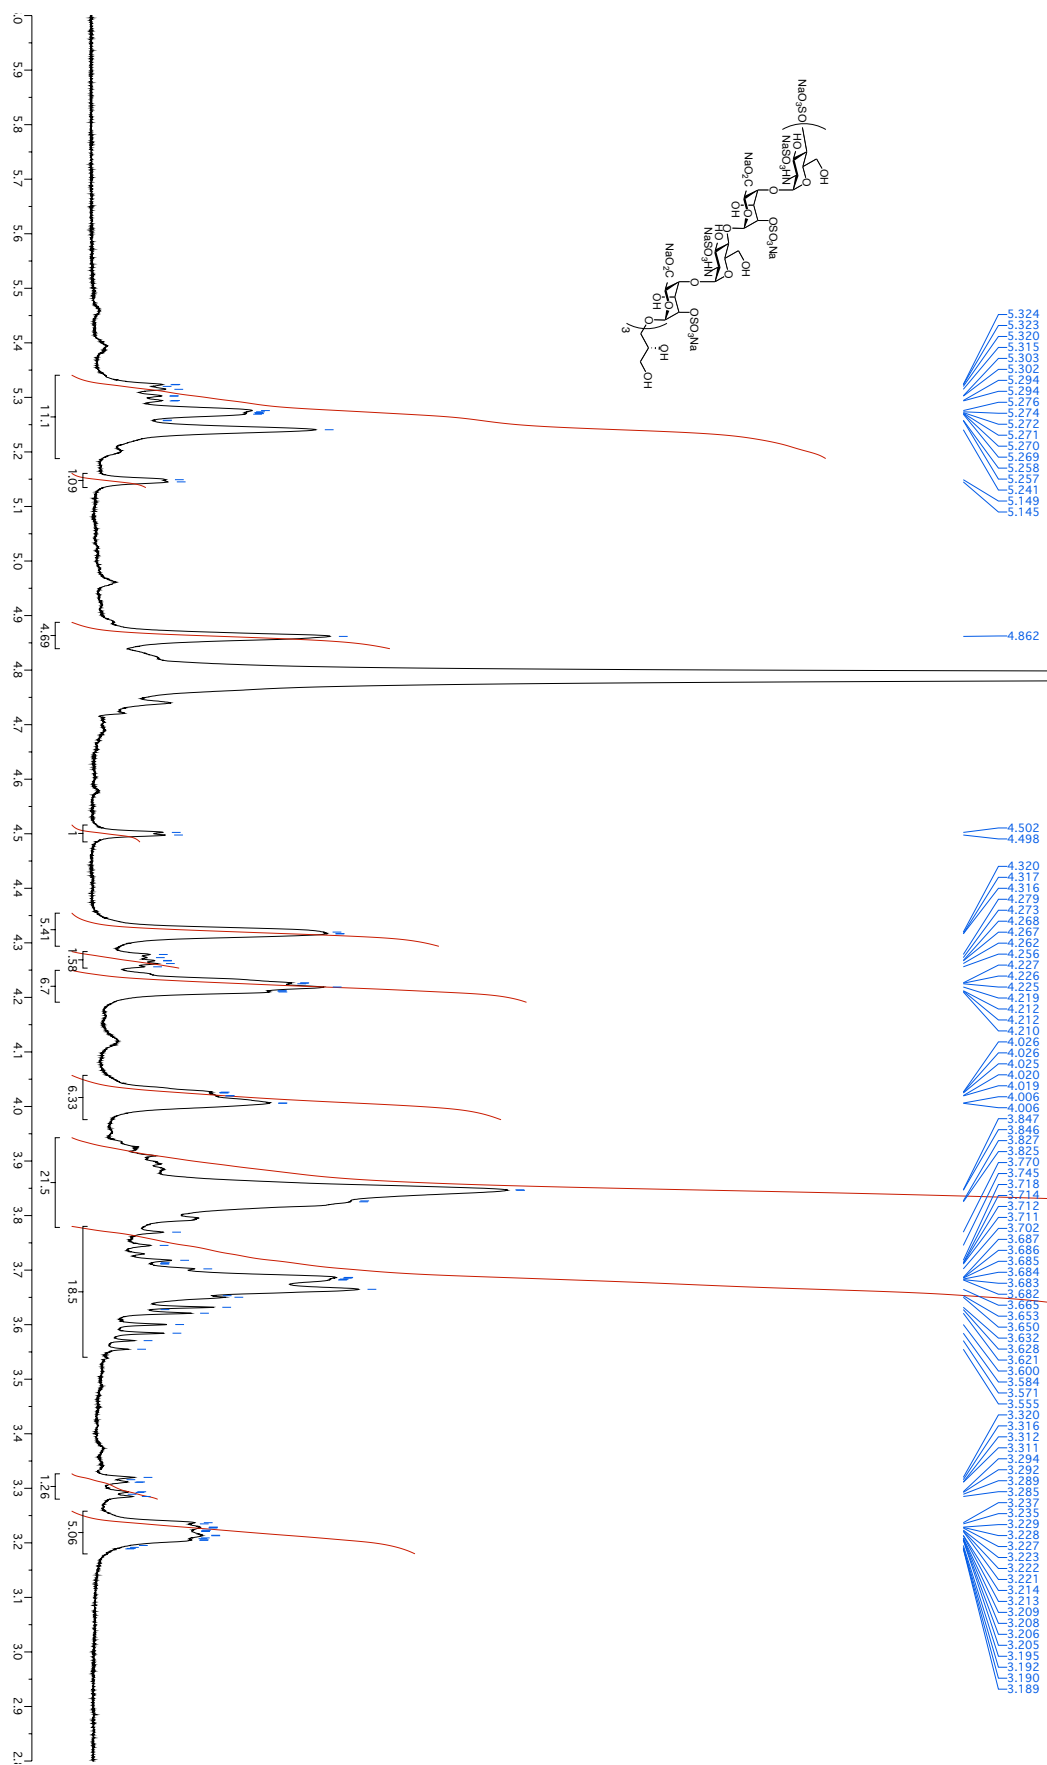

Supplementary Figure S59.  $^1\text{H}$  NMR (400 MHz;  $\text{D}_2\text{O}$ ) spectrum for 14



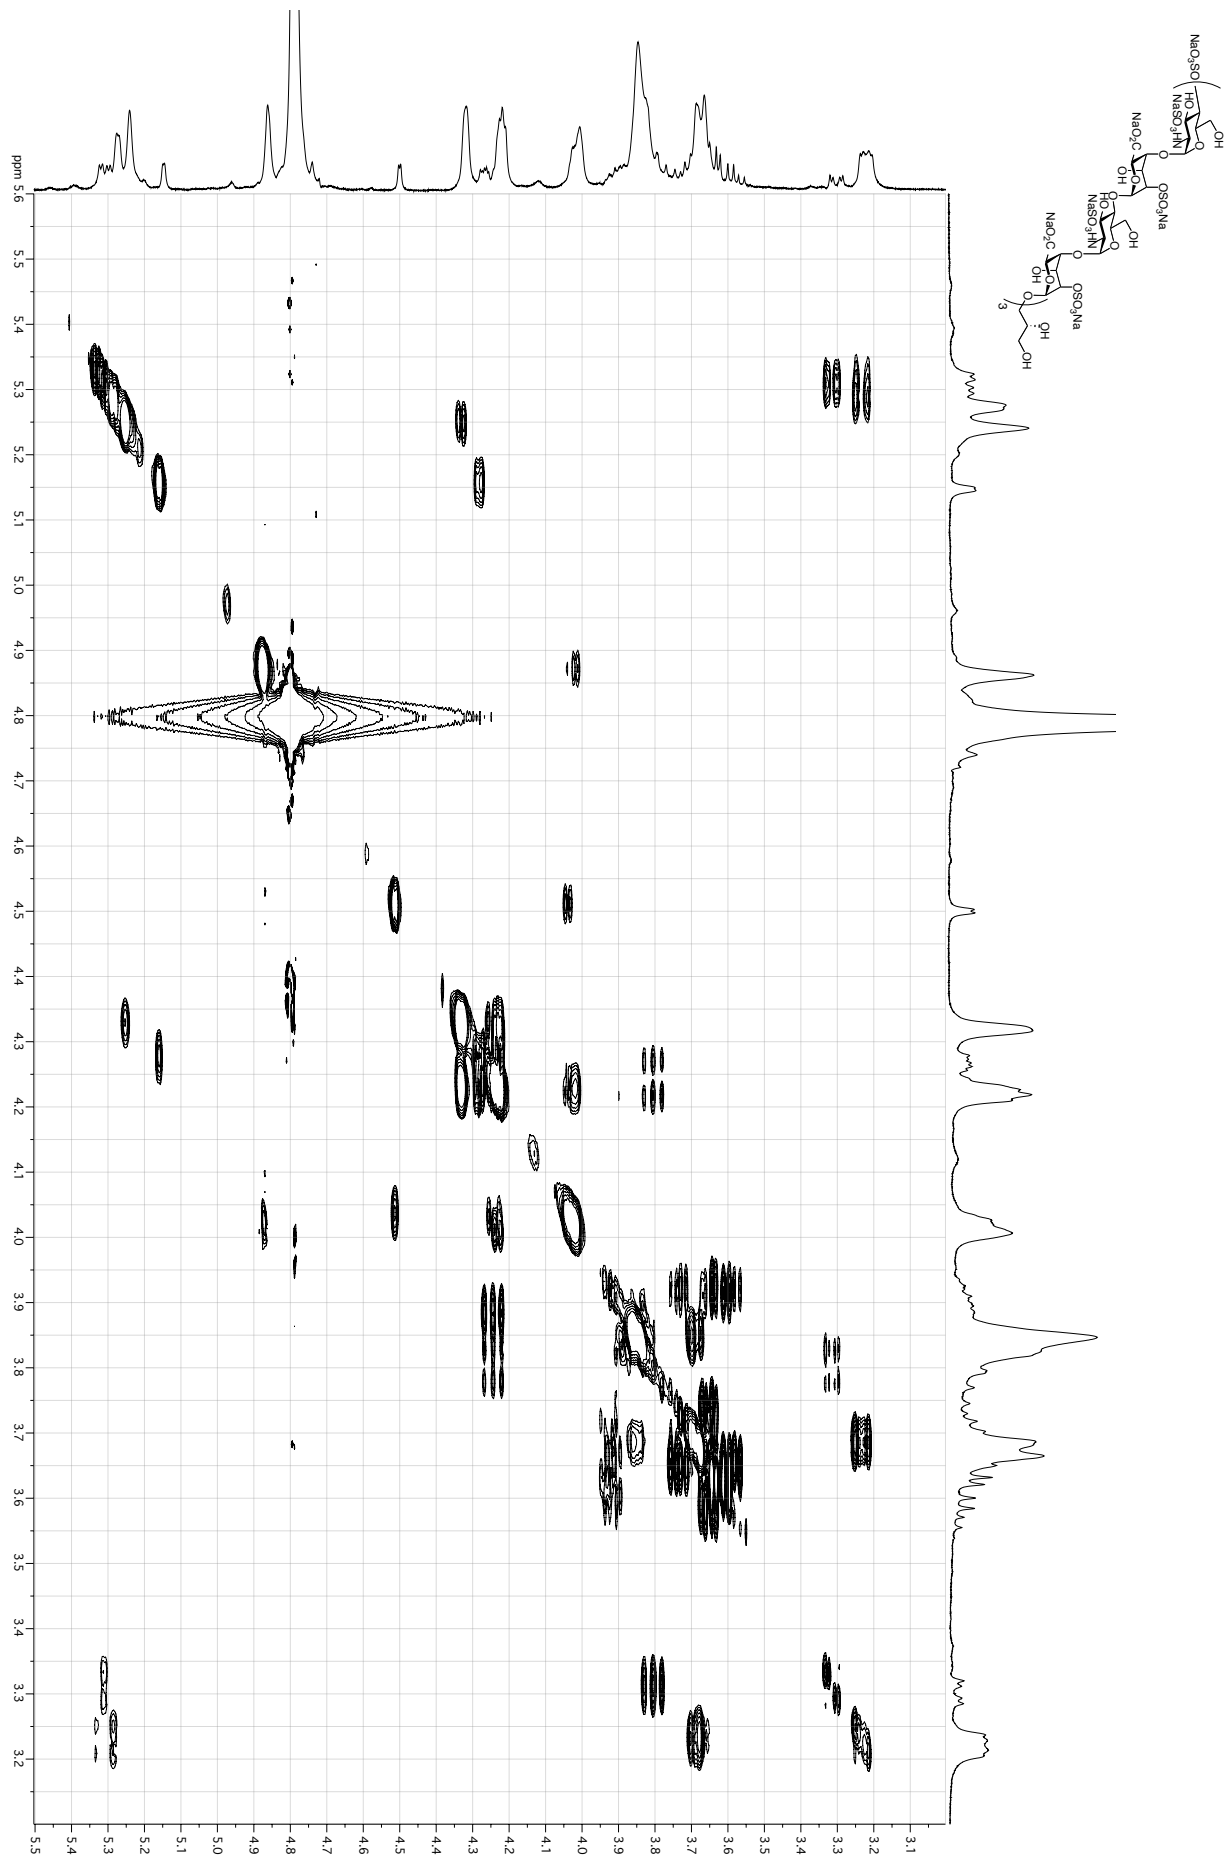

Supplementary Figure S60. COSY NMR spectrum for 14

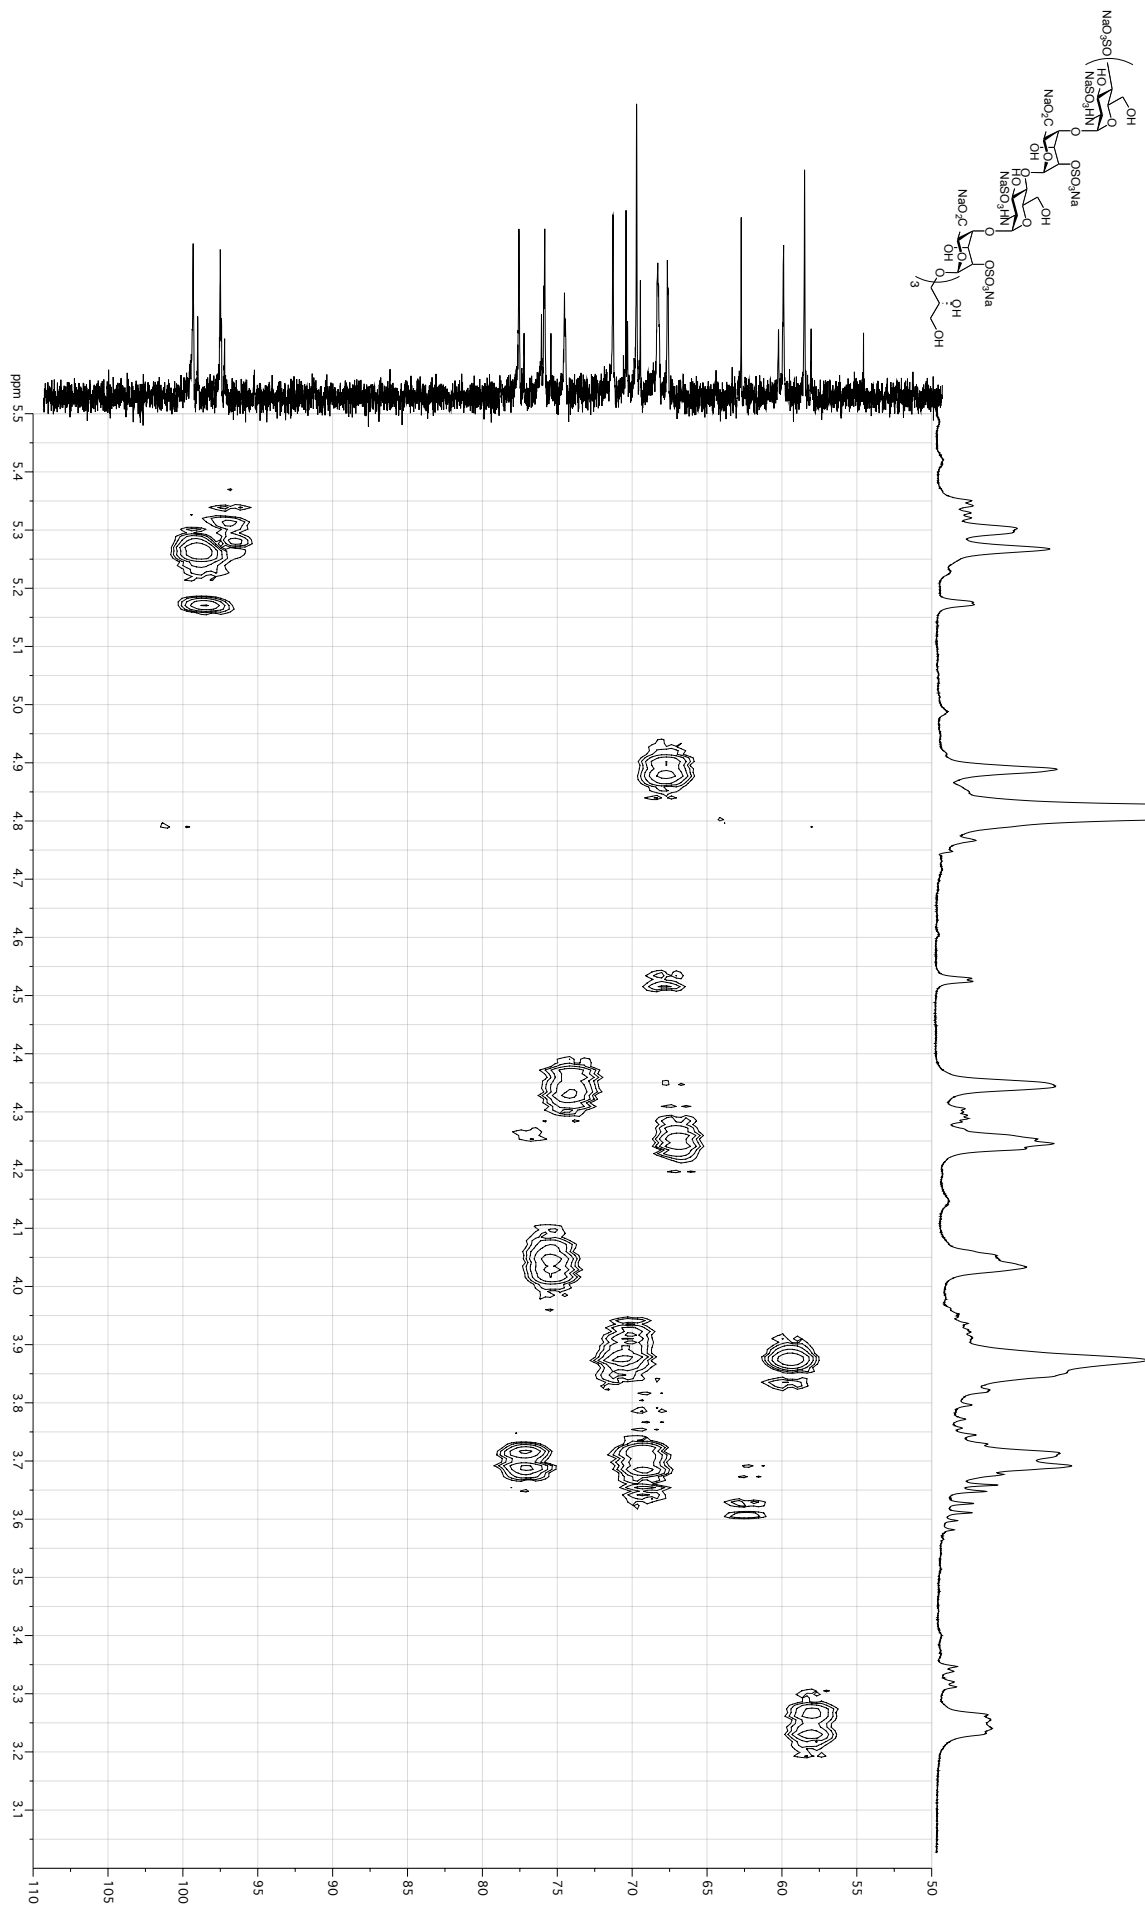

Supplementary Figure S61. HMBC NMR spectrum for 14

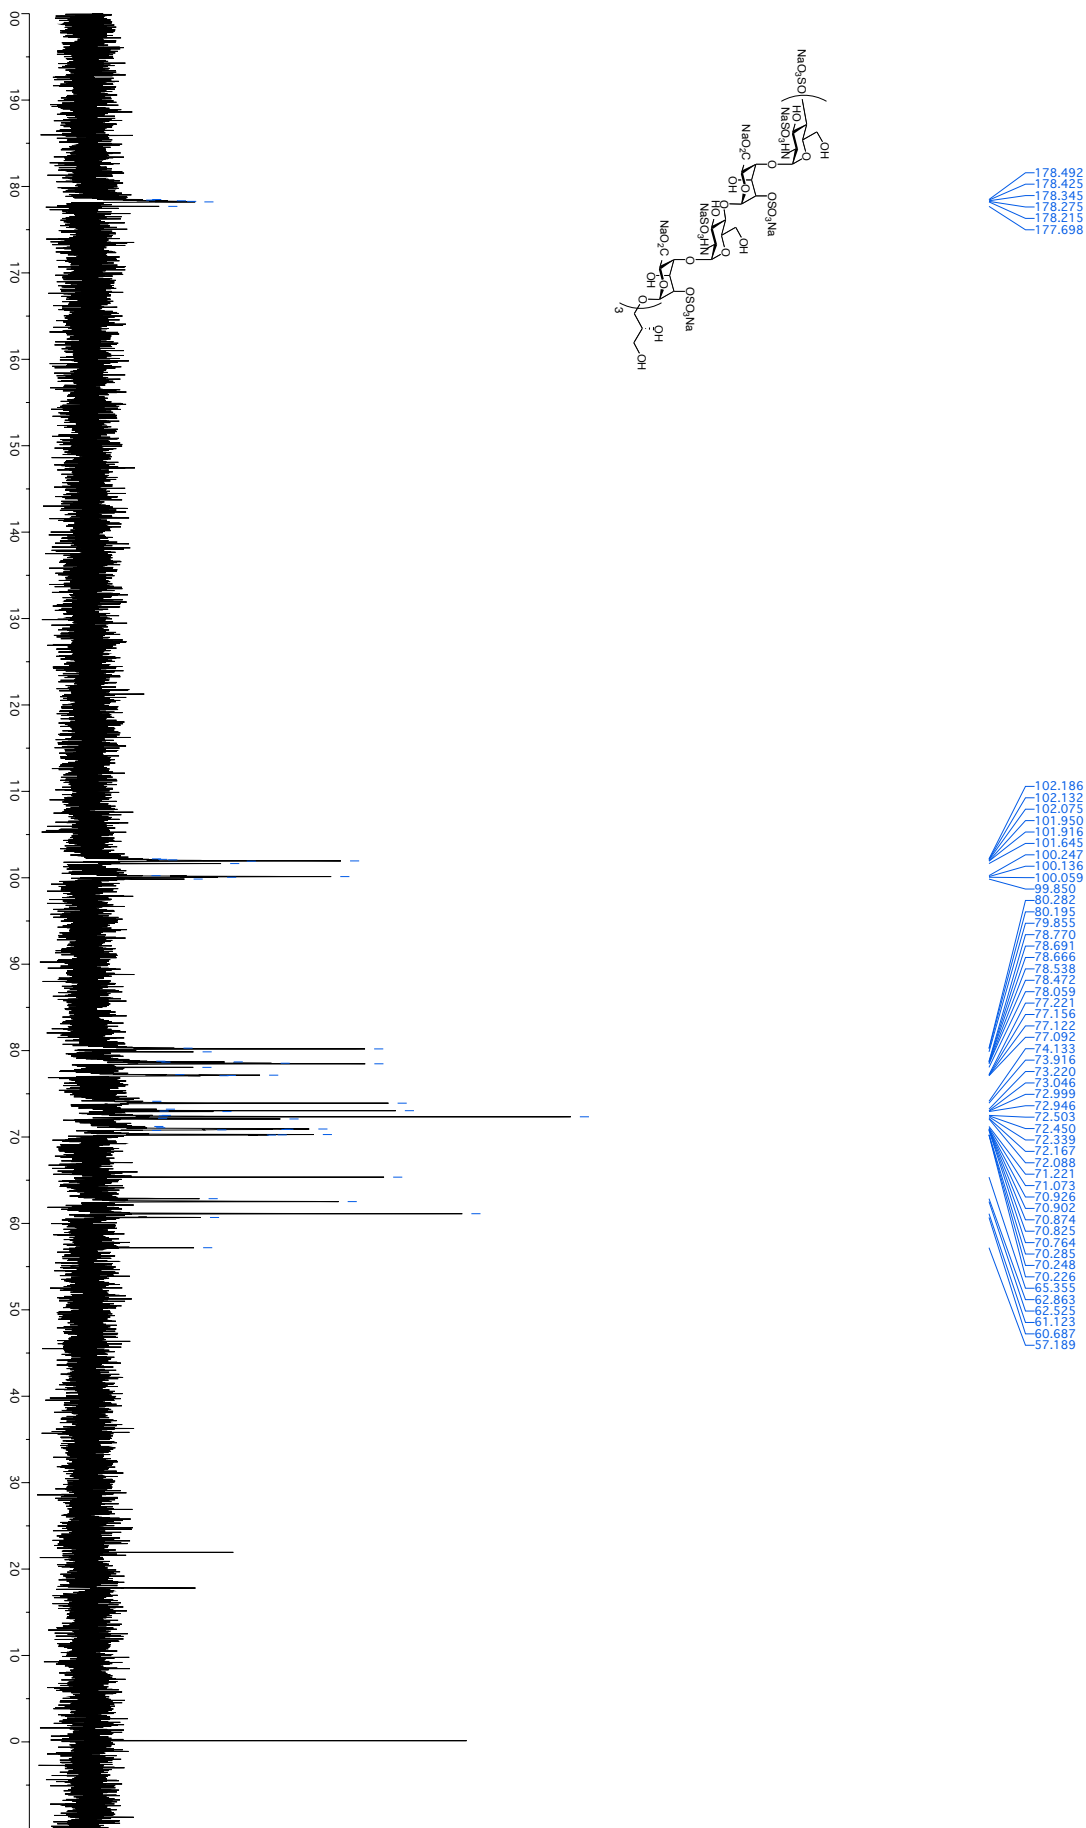

Supplementary Figure S62.  $^{13}\text{C}$  NMR (100 MHz;  $\text{D}_2\text{O}$ ) spectrum for 14

SU1311 MW=3571?  
(H<sub>2</sub>O)/MeOH

EPSRC National Centre Swansea  
LTQ Orbitrap XL

Steen Hansen  
12/07/2010 11:05:16

MANGAR041-OM-HNESN #1-23 RT: 0.20-1.19 AV: 23 SM: 7G NL: 1.36E5  
F: FTMS - p NSI Full ms [200.00-4000.00]

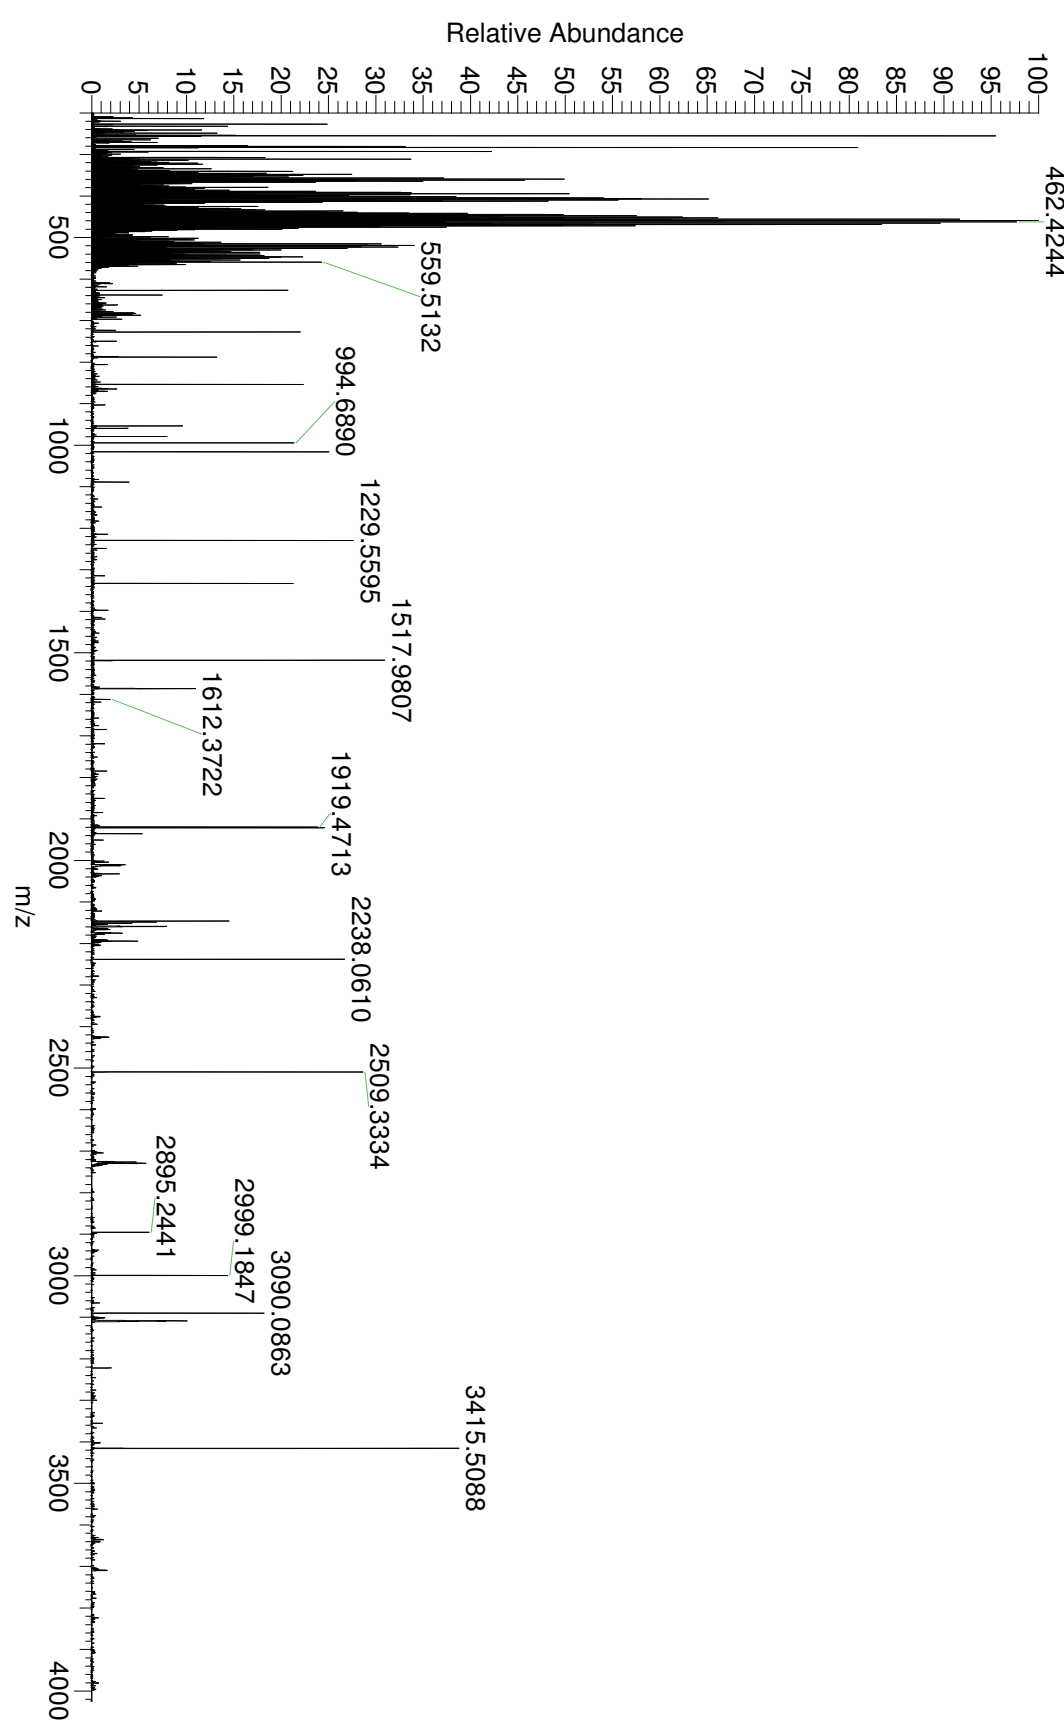

Supplementary Figure S63. FT MS negative mode spectrum for 14

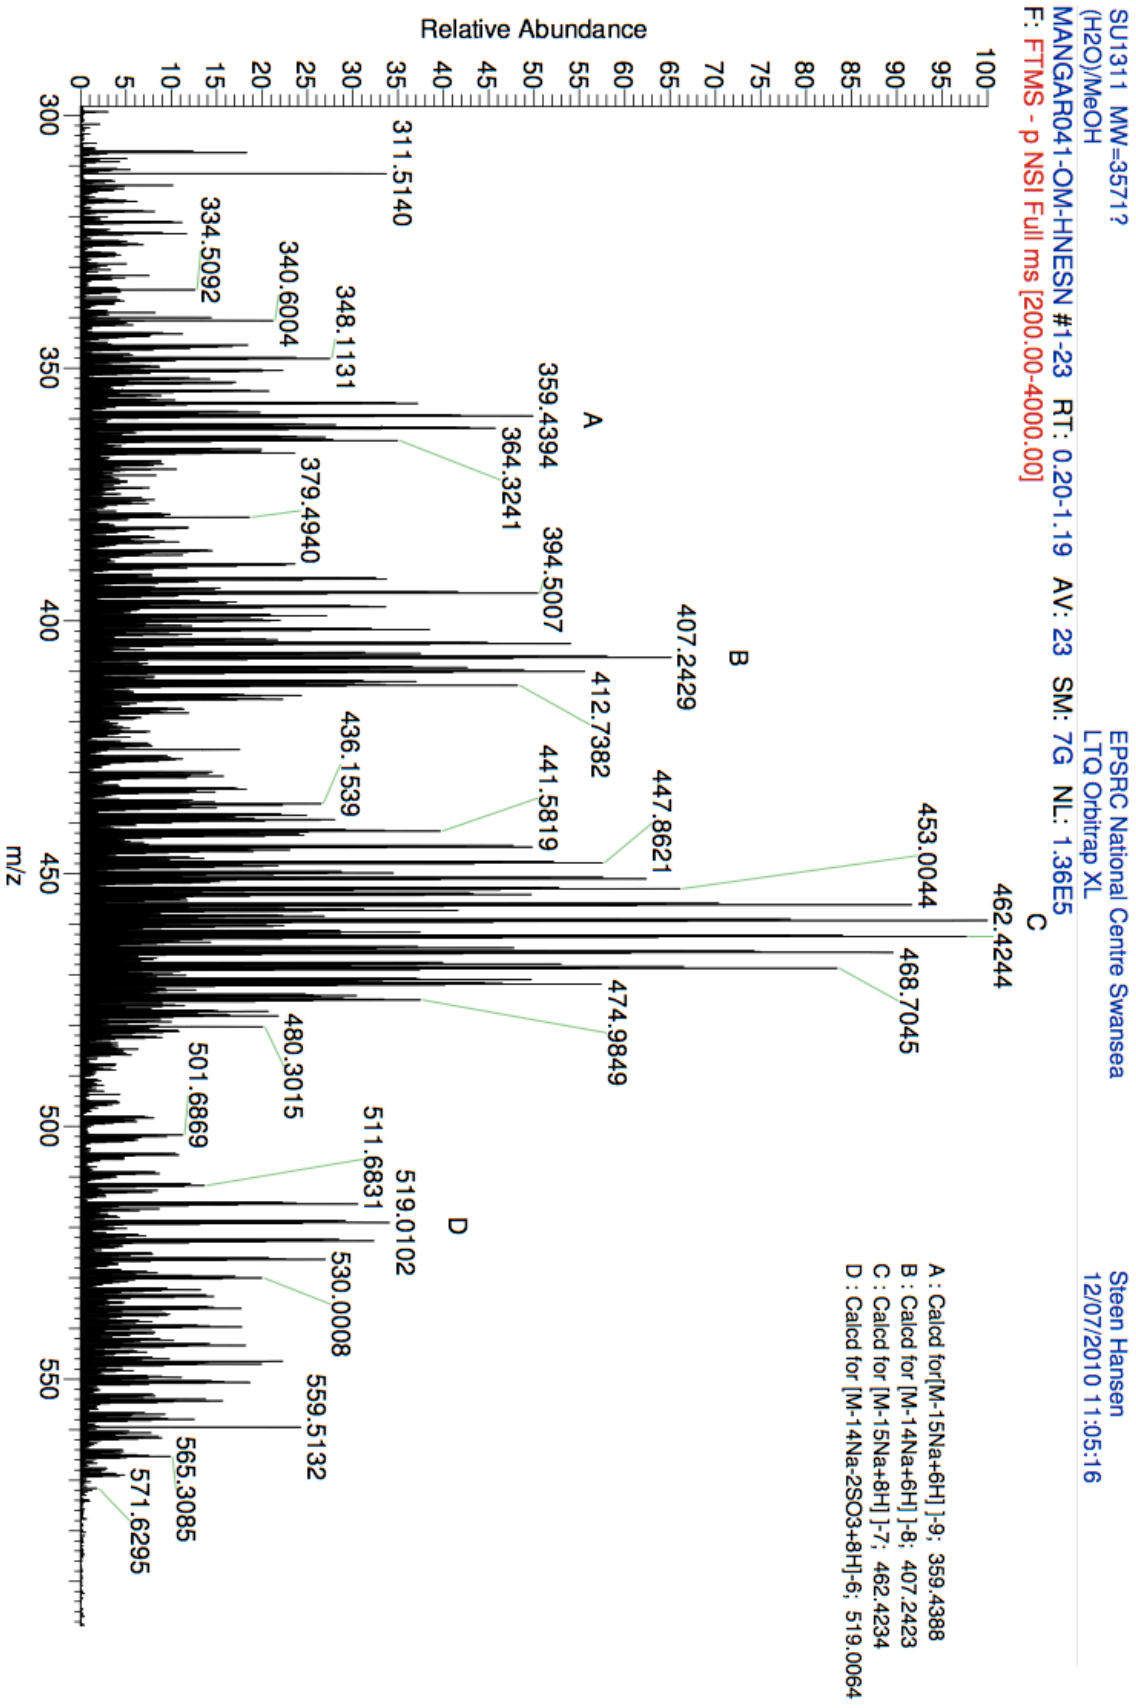

Supplementary Figure S64. FT MS negative mode assigned spectrum for 14

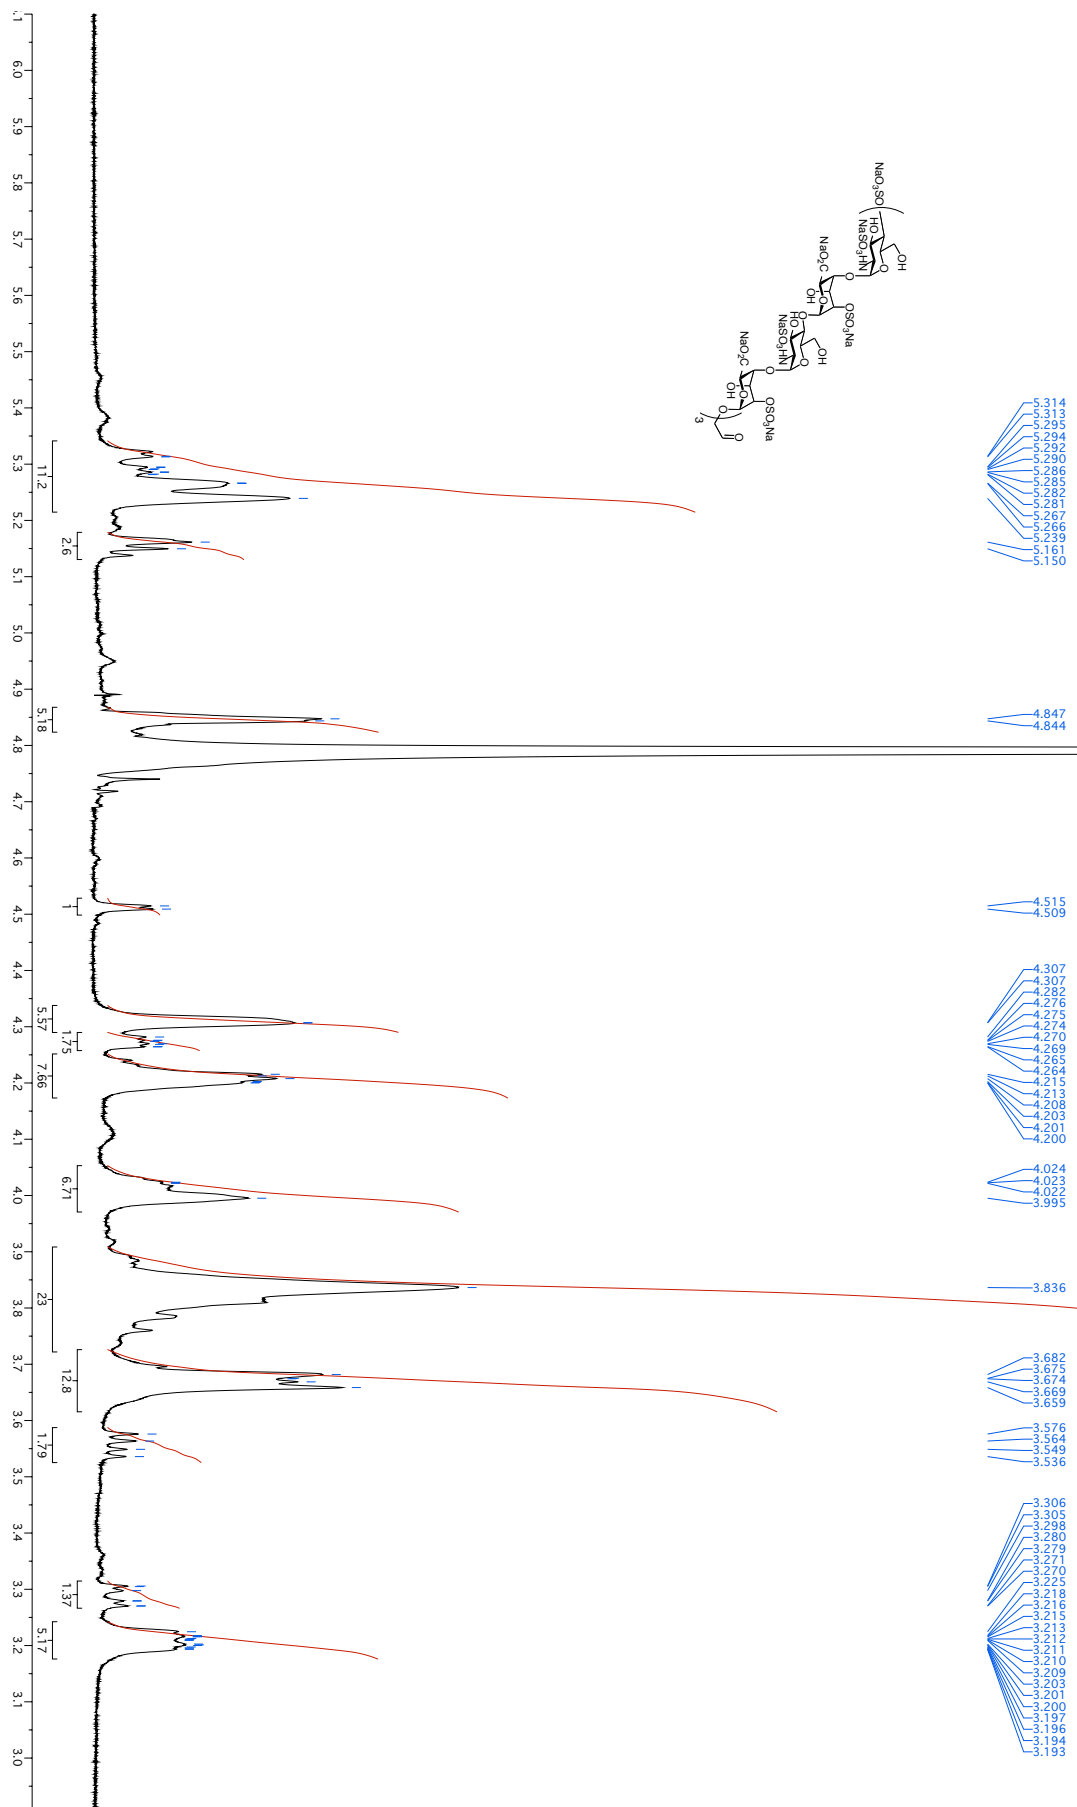

Supplementary Figure S65.  $^1\text{H}$  NMR (400 MHz;  $\text{D}_2\text{O}$ ) spectrum for 15

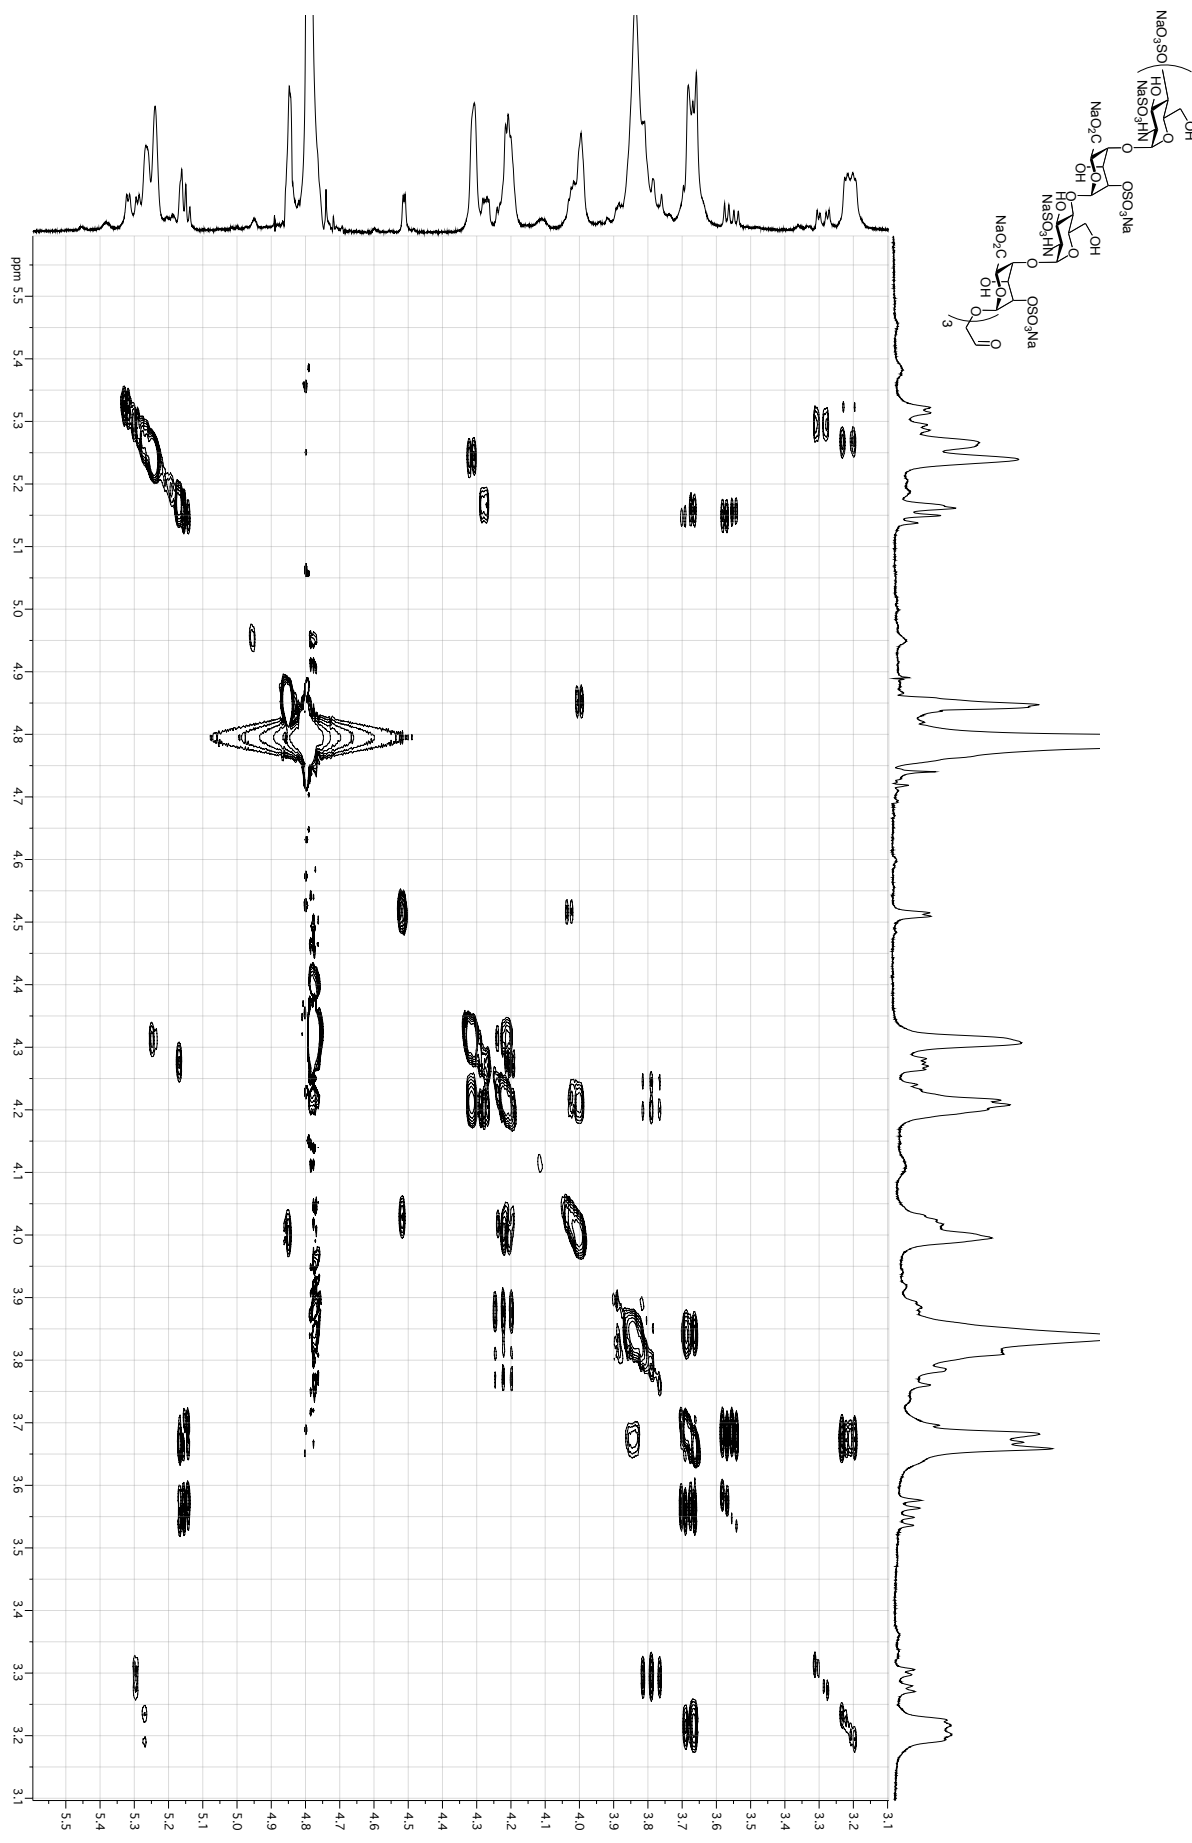

Supplementary Figure S66. COSY NMR spectrum for 15

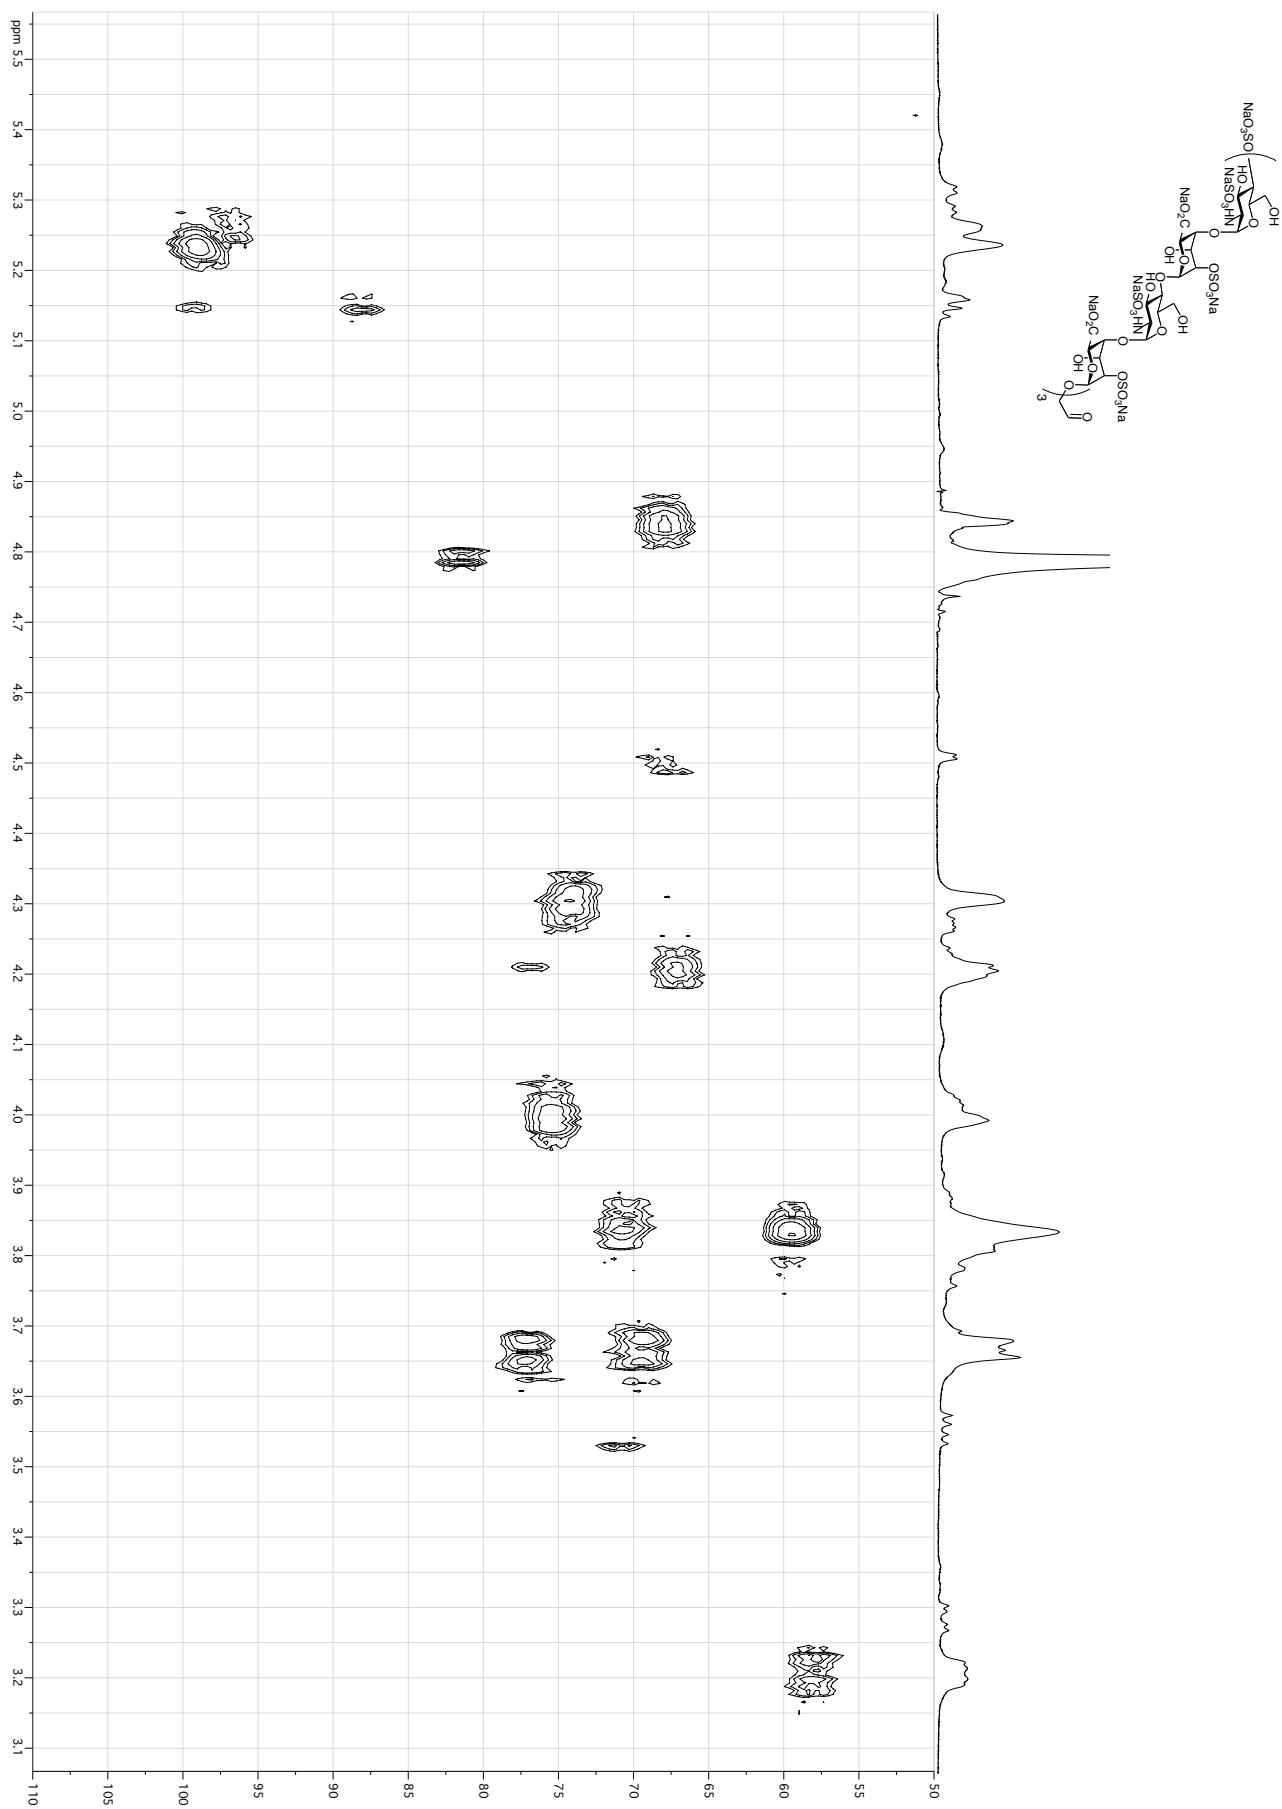

Supplementary Figure S67. HMPC NMR spectrum for 15



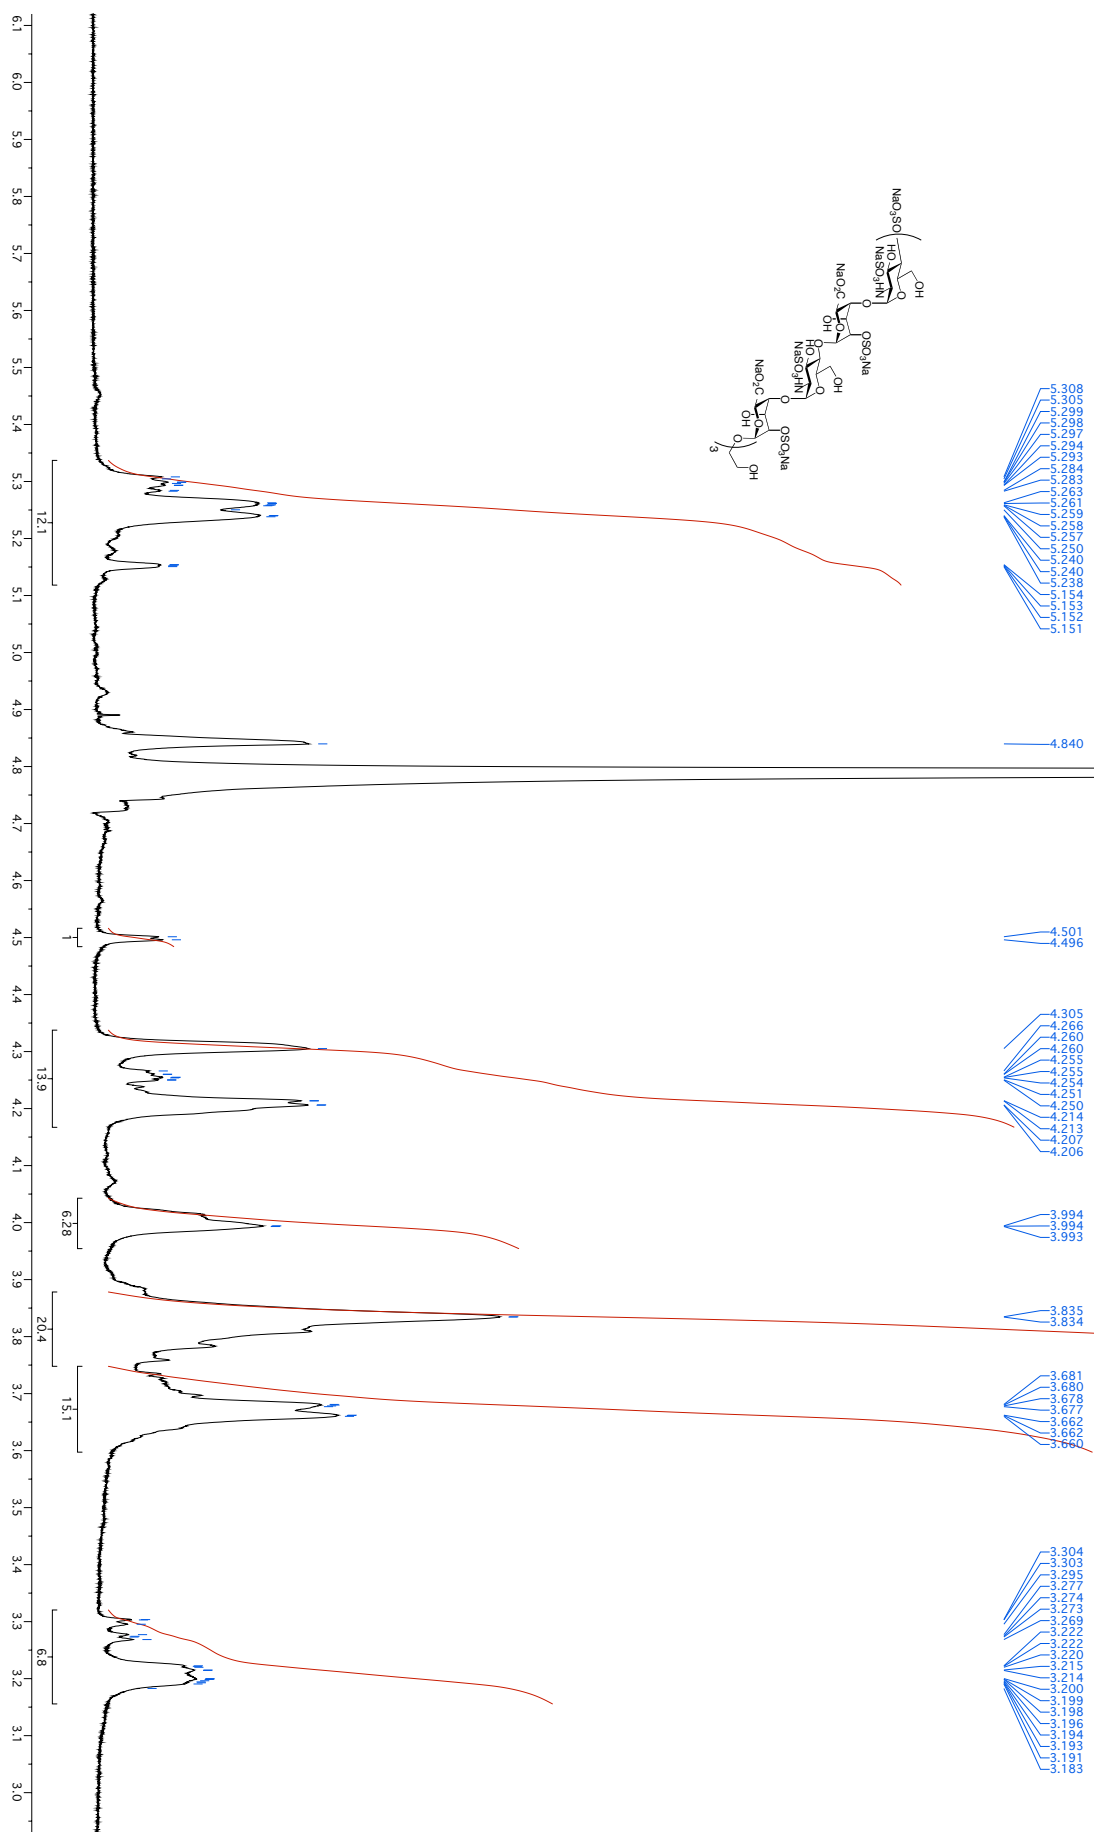

Supplementary Figure S68. <sup>1</sup>H NMR (400 MHz; D<sub>2</sub>O) spectrum for 16

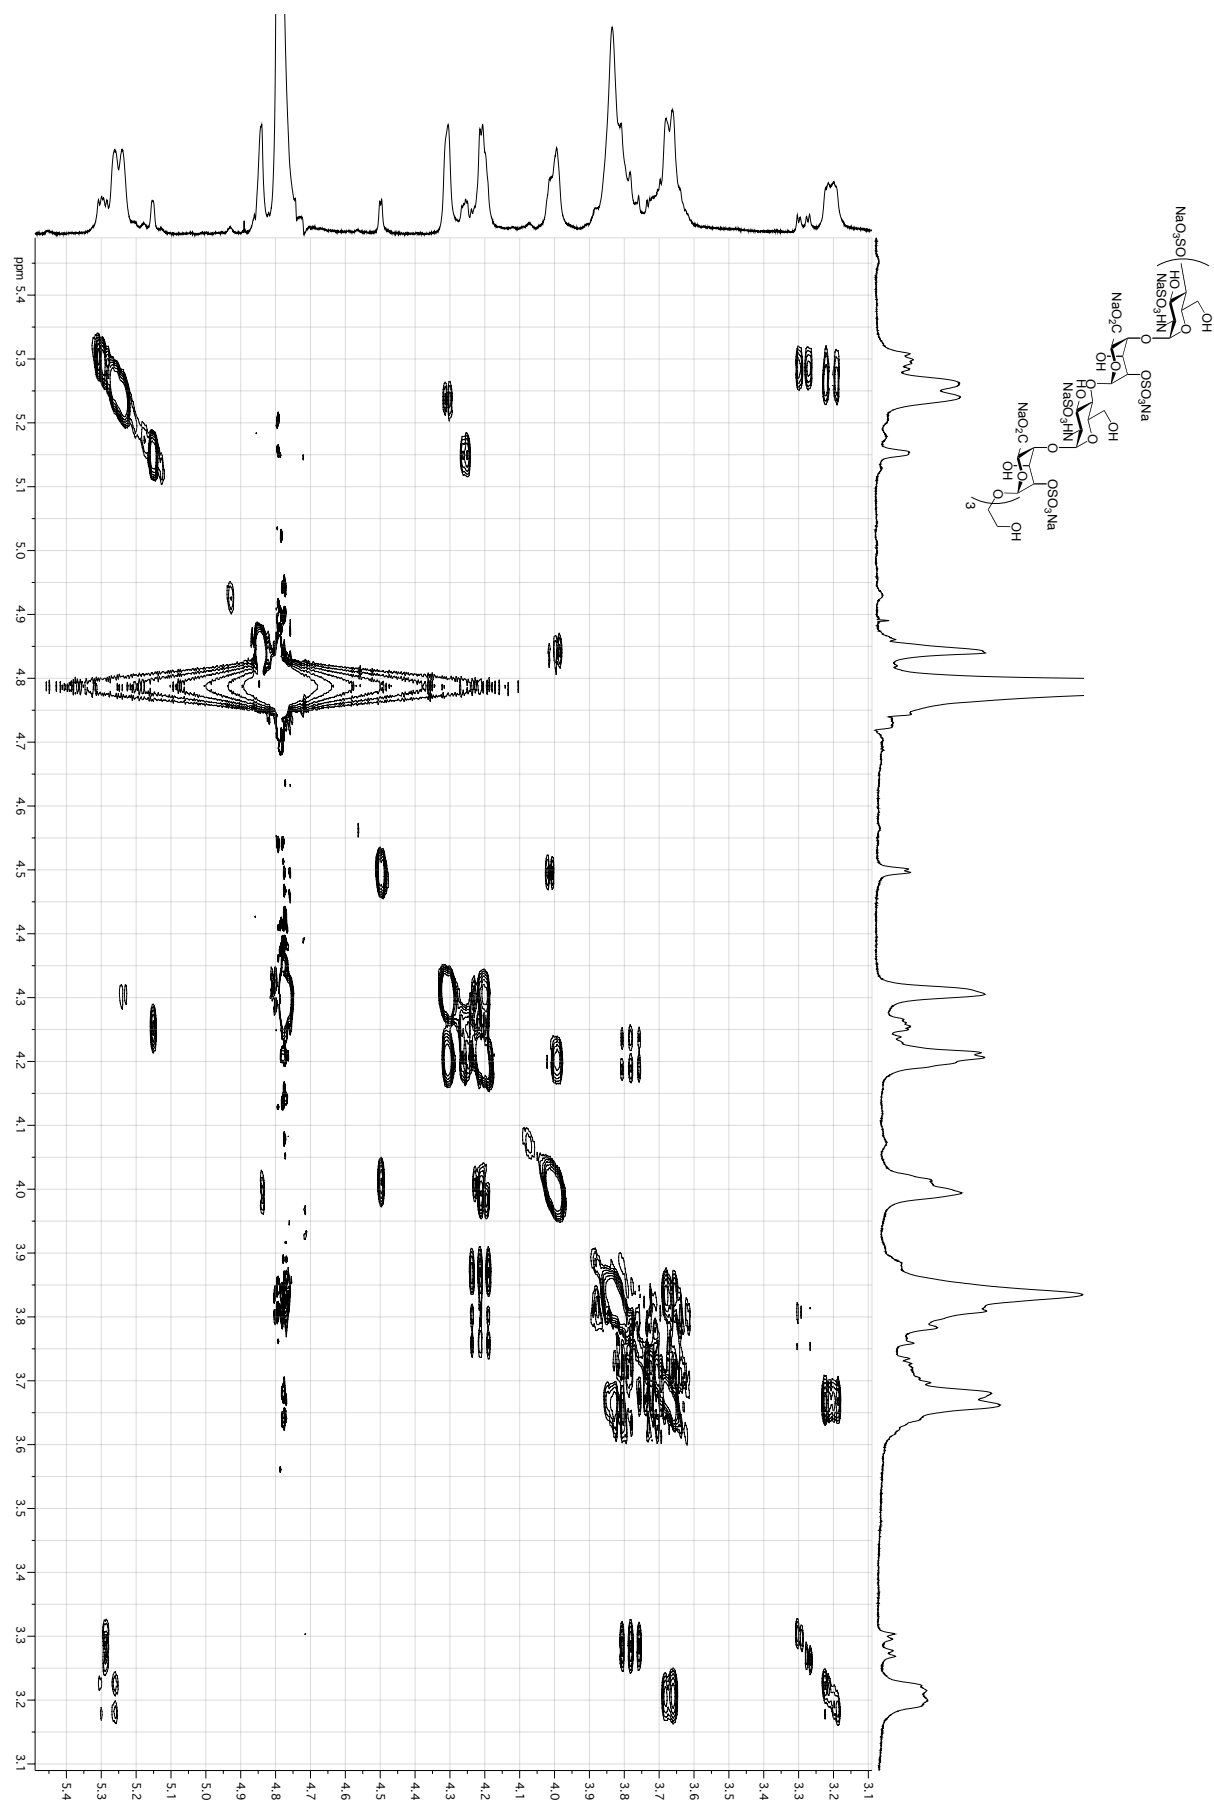

Supplementary Figure S69. COSY NMR spectrum for 16

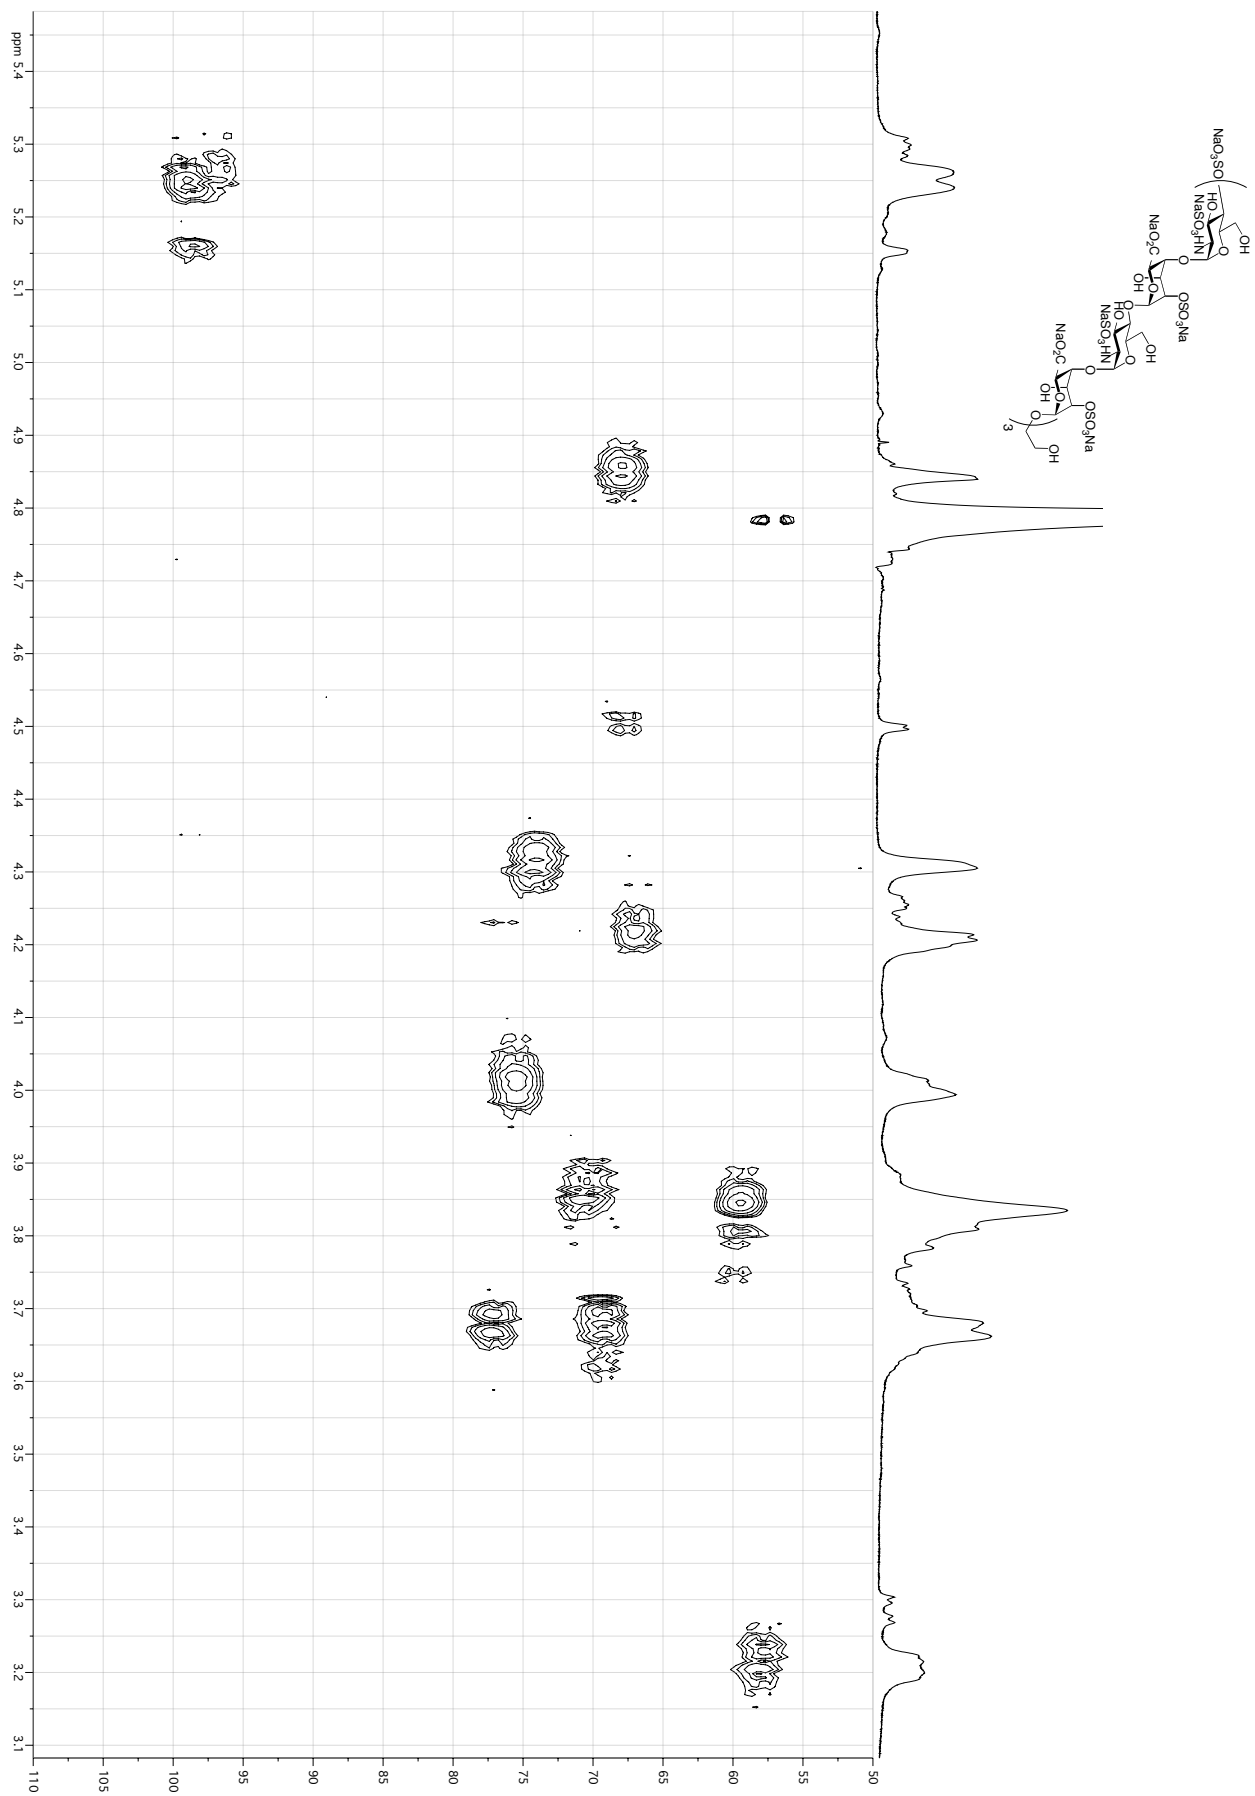

Supplementary Figure S70. HMQC NMR spectrum for 16

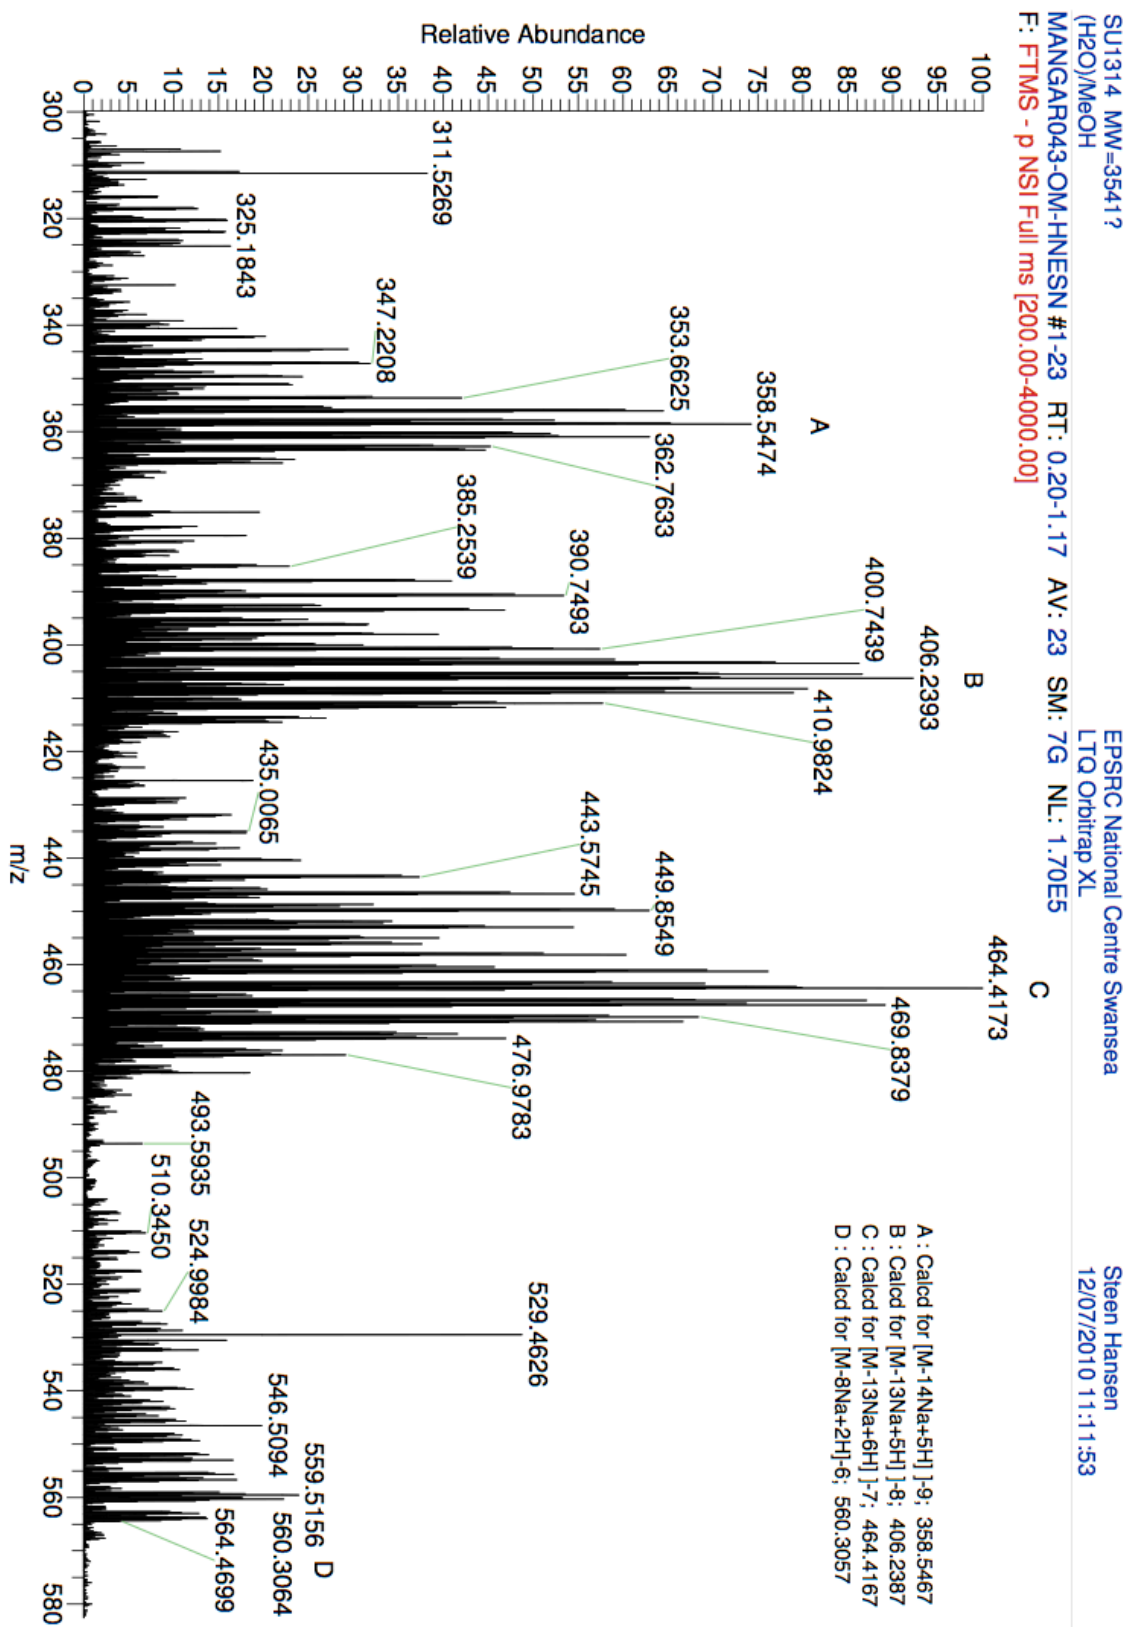

Supplementary Figure S71. FT MS negative mode assigned spectrum for 16

## Supplementary methods

### General methods

All the chemicals used were purchased from commercial sources without further purification. All reactions were monitored by TLC on Merck silica gel plates <sup>60</sup>F<sub>254</sub>. Silica gel 60 (particle size 0.035-0.070 mm) was used for column chromatography. <sup>1</sup>H NMR spectra were recorded at 500 or 400 MHz and <sup>13</sup>C spectra at 100 MHz respectively on Bruker DPX spectrometers. Mass spectra (MS) were recorded using a Micromass Platform II spectrometer using an electro spray ionization source or via the EPSRC National Mass Spectrometry Service (Swansea). Isotope patterns for compounds with mass > 1000 are included in the SI. Optical rotations were obtained using an AA-1000 polarimeter. Elemental analyses were performed by Micro Analytical Laboratory, School of Chemistry, The University of Manchester.

NMR Data were reprocessed using iNMR 4 from Nucleomatica.

### Synthesis of Oligosaccharides

#### **Methyl 2-azido-3,6-di-*O*-benzyl-2-deoxy-4-*O*-*p*-methoxybenzyl- $\alpha$ -D-glucopyranosyl-(1 $\rightarrow$ 4)-(methyl 2-*O*-benzoyl-3-*O*-benzyl-L-idopyranose uronate) (3)**

To **2** (1.85 g, 1.88 mmol) was added acetone 50 mL and cooled to 0 °C in an ice-bath. *N*-Bromosuccinimide (335 mg, 1.88 mmol) was then added and the mixture stirred for 45 min. The reaction was quenched by addition of saturated NaHCO<sub>3</sub> solution (5 mL), the acetone evaporated and DCM (200 mL) and water (200 mL) added. The organic phase was separated, dried (MgSO<sub>4</sub>), filtered and evaporated. The crude product was purified using flash column chromatography (EtOAc/hexane 1:2) to yield 1.45 g (87%) of **3** as a white foam ( $\alpha/\beta \sim 1:1$ ). *R*<sub>f</sub> 0.17 (EtOAc/Hexane 1:2). <sup>1</sup>H NMR (400 MHz; CDCl<sub>3</sub>)  $\delta$  8.11-8.07 (m, 2H, Bz), 7.40-7.17 (m, 16H, Ph), 7.11-7.07 (m, 2H, Bz), 7.02 (d, *J* = 8.8 Hz, 2H, PMB), 6.84 (d, *J* = 8.8 Hz, 2H, PMB), 5.46-5.43 (m, 1H, H-1 $\alpha$ ), 5.22 (dd, *J* = 11.6 Hz, 2 Hz, 1H, H-1 $\beta$ ), 5.08-5.06 (m, 2H, H-2 $\alpha$ , H-2 $\beta$ ), 4.91-4.90 (m, 1H, H-5 $\alpha$ ), 4.90-4.75 (m, 2H, CH<sub>2</sub>Ph), 4.69 (d, *J* = 3.6 Hz, 1H, H'-1), 4.66 (d, *J* = 3.6 Hz, 1H, H'-1), 4.62-4.35 (m, 4H, CH<sub>2</sub>Ph, CH<sub>2</sub>PMP), 4.60-4.59 (m, 1H, H-5 $\beta$ ), 4.33 (t, *J* = 2.8 Hz, 1H, H-3 $\beta$ ), 4.30 (dt, *J* = 2.8 Hz, 1.2 Hz, 1H, H-3 $\alpha$ ), 4.20 (d, *J* = 9.2 Hz, 1H, OH $\alpha$ ), 4.06-3.59 (m, 14H, H-4, H'-4, H'-5, H'-6, CH<sub>2</sub>Ph), 3.82 (s, 3H, PhOCH<sub>3</sub>), 3.81 (s, 3H, PhOCH<sub>3</sub>), 3.74 (s, 3H, COOCH<sub>3</sub>), 3.73 (s, 3H, COOCH<sub>3</sub>), 3.41-3.36 (m, 2H, H'-3), 3.25-3.21 (m, 2H, H'-2). <sup>13</sup>C NMR (100 MHz; CDCl<sub>3</sub>)  $\delta$  169.5, 168.7, 165.9, 165.7, 159.2, 137.9, 137.9, 137.8, 137.0, 136.5, 133.4, 133.3, 130.4, 130.0, 129.5, 129.4, 129.0, 128.9, 128.8, 128.7, 128.6, 128.5, 128.4, 128.4, 128.3, 128.3, 128.2, 128.1, 127.8, 127.7, 127.7, 127.6, 113.6, 100.4, 93.8, 92.6, 80.2, 80.0, 77.4, 77.3, 77.3, 76.2, 75.9, 74.5, 74.5, 74.0, 73.7, 73.6, 73.4, 73.0, 71.8, 71.7, 68.6, 67.6, 67.5, 67.0, 63.7, 63.7, 56.3, 55.3, 52.5, 52.4. HRMS (FT MS): *m/z*: calcd for C<sub>49</sub>H<sub>55</sub>N<sub>4</sub>O<sub>13</sub> [*M*+NH<sub>4</sub>]<sup>+</sup>: 907.3760; found: 907.3766.

#### **Methyl 2-azido-3,6-di-*O*-benzyl-2-deoxy-4-*O*-*p*-methoxybenzyl- $\alpha$ -D-glucopyranosyl-(1 $\rightarrow$ 4)-(methyl 2-*O*-benzoyl-3-*O*-benzyl-1-trichloroacetimidate- $\alpha/\beta$ -L-idopyranuronate) (4)**

To **3** (505 mg, 0.57 mmol) was added dry DCM (10 mL), CCl<sub>3</sub>CN (0.40 mL, 3.99 mmol), 1,8-diazabicyclo[5.4.0]undec-7-ene (DBU) (10  $\mu$ L, 0.07 mmol) and the mixture stirred under N<sub>2</sub> for 1 h. The solution was evaporated and the crude product was purified using flash column

chromatography (EtOAc/hexane 1:3 with 1% NEt<sub>3</sub>), yielding 535 mg (91%) of **4** as an oil ( $\alpha/\beta \sim 3:1$ ).  $\alpha$ -**4**: *R<sub>f</sub>* 0.30 (EtOAc/Hexane 1:3). <sup>1</sup>H NMR (400 MHz; CDCl<sub>3</sub>)  $\delta$  8.70 (s, 1H, C=NH), 8.15-8.12 (m, 2H, Bz), 7.44-7.11 (m, 18H, Ph), 7.07 (d, *J* = 8.6 Hz, 2H, PMB), 6.87 (d, *J* = 8.6 Hz, 2H, PMB), 6.57-6.56 (m, 1H, H-1), 5.36-5.35 (m, 1H, H-2), 5.03 (d, *J* = 2.6 Hz, 1H, H-5), 4.96-4.77 (m, 2H, CH<sub>2</sub>Ph), 4.81 (d, *J* = 3.5 Hz, 1H, H<sup>'</sup>-1), 4.63-4.40 (m, 4H, CH<sub>2</sub>Ph, CH<sub>2</sub>PMP), 4.27-4.26 (m, 1H, H-3), 4.20-4.19 (m, 1H, H-4), 4.13-4.11 (m, 1H, CH<sub>2</sub>Ph), 3.93-3.81 (m, 4H, H<sup>'</sup>-5, H<sup>'</sup>-6a, H<sup>'</sup>-6b, CH<sub>2</sub>Ph), 3.83 (s, 3H, PhOCH<sub>3</sub>), 3.75 (s, 3H, COOCH<sub>3</sub>), 3.71-3.66 (m, 1H, H<sup>'</sup>-4), 3.50 (t, *J* = 10.0 Hz, 1H, H<sup>'</sup>-3), 3.25 (dd, *J* = 10.3 Hz, *J* = 3.5 Hz, 1H, H<sup>'</sup>-2). <sup>13</sup>C NMR (100 MHz; CDCl<sub>3</sub>)  $\delta$  168.7, 165.5, 160.2, 159.3, 137.9, 137.8, 137.3, 133.5, 130.5, 130.1, 129.5, 129.3, 128.9, 128.4, 128.4, 128.2, 128.0, 127.9, 127.8, 127.7, 127.7, 113.7, 100.3, 96.1, 90.8, 80.1, 77.4, 77.1, 76.7, 75.8, 74.6, 74.5, 73.6, 72.5, 72.2, 71.8, 69.0, 67.7, 65.7, 63.7, 55.4, 52.5.

$\beta$ -**4**: *R<sub>f</sub>* 0.16 (EtOAc/Hexane 1:3). <sup>1</sup>H NMR (400 MHz; CDCl<sub>3</sub>)  $\delta$  8.68 (s, 1H, C=NH), 8.14-8.12 (m, 2H, Bz), 7.43-7.12 (m, 18H, Ph), 7.04 (d, *J* = 8.6 Hz, 2H, PMB), 6.85 (d, *J* = 8.6 Hz, 2H, PMB), 6.31 (d, *J* = 1.9 Hz, 1H, H-1), 5.48 (dd, *J* = 3.0 Hz, *J* = 1.9 Hz, 1H, H-2), 4.92-4.79 (m, 2H, CH<sub>2</sub>Ph), 4.62-4.37 (m, 5H, H-3, CH<sub>2</sub>Ph, CH<sub>2</sub>PMP), 4.13-4.11 (m, 1H, CH<sub>2</sub>Ph), 4.04-4.03 (m, 1H, H-4), 3.88-3.61 (m, 5H, H<sup>'</sup>-4, H<sup>'</sup>-5, H<sup>'</sup>-6a, H<sup>'</sup>-6b, CH<sub>2</sub>Ph), 3.82 (s, 3H, PhOCH<sub>3</sub>), 3.75 (s, 3H, COOCH<sub>3</sub>), 3.48 (t, *J* = 10.2 Hz, 1H, H<sup>'</sup>-3), 3.28 (dd, *J* = 10.2 Hz, *J* = 3.5 Hz, 1H, H<sup>'</sup>-2). <sup>13</sup>C NMR (100 MHz; CDCl<sub>3</sub>)  $\delta$  167.9, 166.3, 163.6, 160.4, 159.3, 137.9, 137.8, 136.9, 133.3, 130.4, 130.1, 129.6, 128.8, 128.7, 128.5, 128.4, 128.4, 128.3, 128.3, 128.2, 127.9, 127.8, 127.7, 113.7, 100.5, 95.2, 90.5, 80.2, 77.4, 77.1, 76.8, 76.7, 76.2, 74.7, 74.6, 74.5, 73.8, 73.6, 73.3, 71.8, 67.7, 66.5, 63.8, 55.4, 52.5. HRMS (FT MS): *m/z*: calcd for C<sub>51</sub>H<sub>51</sub>Cl<sub>3</sub>N<sub>4</sub>O<sub>13</sub> [M+NH<sub>4</sub>]<sup>+</sup>: 1052.2844; found: 1052.2842.

**Methyl [2-azido-3,6-di-*O*-benzyl-2-deoxy-4-*O*-*p*-methoxybenzyl- $\alpha$ -D-glucopyranosyl-(1 $\rightarrow$ 4)-(methyl 2-*O*-benzoyl-3-*O*-benzyl- $\alpha$ -L-idopyranosyl uronate)-(1 $\rightarrow$ 4)-2-azido-3,6-di-*O*-benzyl-2-deoxy- $\alpha$ -D-glucopyranosyl-(1 $\rightarrow$ 4)-(phenyl 2-*O*-benzoyl-3-*O*-benzyl-1-thio- $\beta$ -L-idopyranoside)] uronate ( $\beta$ -6)**

To **5** (1.05 g, 1.21 mmol) and **4** (1.43 g, 1.38 mmol) was added dry DCM (20 mL), the mixture cooled to -25 °C and TMSOTf (2  $\mu$ L, 0.01 mmol) added and the mixture stirred under a N<sub>2</sub> atmosphere for 30 min. More TMSOTf (2  $\mu$ L, 0.01 mmol) was then added, the mixture left another 30 min. and then quenched by addition of a few drops of NEt<sub>3</sub>. The solution was evaporated and the crude product was purified using flash column chromatography (EtOAc/hexane 1:3). A second column (DCM/EtOAc 20:1) removed remaining Cl<sub>3</sub>CONH<sub>2</sub>. This yielded 1.80 g (85%) of the product  $\beta$ -**6** as a foam. *R<sub>f</sub>* 0.16 (EtOAc/Hexane 1:3). [ $\alpha$ ]<sub>D</sub><sup>20</sup> = +21.1 (*c* = 0.85, CH<sub>2</sub>Cl<sub>2</sub>). <sup>1</sup>H NMR (400 MHz; CDCl<sub>3</sub>)  $\delta$  8.23-8.21 (m, 2H, Bz), 7.96-7.94 (m, 2H, Bz), 7.56-7.53 (m, 2H, Bz), 7.41-7.21 (m, 35H, Ph), 7.09-7.05 (m, 4H, Bz, PMB), 6.84 (d, *J* = 8.4 Hz, 2H, PMB), 5.50 (d, *J* = 4.0 Hz, 1H, H<sup>'</sup>-1), 5.26 (d, *J* = 2.0 Hz, 1H, H-1), 5.23-5.22 (m, 1H, H-2), 5.19 (t, *J* = 4.4 Hz, 1H, H<sup>'</sup>-2), 4.96 (d, 1H, *J* = 3.6 Hz, H<sup>'</sup>-1), 4.88-4.74 (m, 4H, CH<sub>2</sub>Ph, CH<sub>2</sub>PMP), 4.65-4.42 (m, 12H, H<sup>'</sup>-1, H-4, H-5, H<sup>'</sup>-5, 4xCH<sub>2</sub>Ph), 4.62-4.35 (m, 4H, CH<sub>2</sub>Ph, CH<sub>2</sub>PMP), 4.60-4.59 (m, 1H, H-5 $\beta$ ), 4.33 (t, *J* = 2.8 Hz, 1H, H-3 $\beta$ ), 4.30-4.21 (m, 4H, H-3, H<sup>'</sup>-3, CH<sub>2</sub>Ph), 4.04 (t, *J* = 4.4 Hz, 1H, H<sup>'</sup>-4), 3.93-3.37 (m, 10H, H<sup>'</sup>-3, H<sup>'</sup>-4, H<sup>'</sup>-5, H<sup>'</sup>-6, H<sup>'</sup>-3, H<sup>'</sup>-4, H<sup>'</sup>-5, H<sup>'</sup>-6), 3.81 (s, 3H, PhOCH<sub>3</sub>), 3.48 (s, 3H, COOCH<sub>3</sub>), 3.43 (s, 3H, COOCH<sub>3</sub>), 3.27-3.21 (m, 2H, H<sup>'</sup>-2, H<sup>'</sup>-2). <sup>13</sup>C NMR (100 MHz; CDCl<sub>3</sub>)  $\delta$  169.2, 168.6, 166.4, 165.2, 159.3, 138.0, 137.9, 137.9, 137.4, 137.0, 134.8, 133.4, 133.3, 131.5, 130.4, 130.1, 129.9, 129.7, 129.5, 129.4, 129.0, 128.7, 128.6, 128.5, 128.4, 128.4, 128.3, 128.3, 128.2, 128.1, 128.1, 128.0, 127.9, 127.8, 127.8, 127.7, 127.7, 127.2, 113.7, 99.7, 99.0, 98.3, 86.0, 79.9, 78.7, 77.6, 77.5, 77.4, 77.2, 76.8, 75.7, 75.5, 75.4, 75.1, 74.9,

74.6, 74.4, 73.9, 73.6, 72.9, 72.4, 71.7, 71.4, 70.2, 70.0, 69.7, 67.7, 67.6, 63.8, 63.5, 55.4, 52.1, 51.9. HRMS (FT MS):  $m/z$ : calcd for  $C_{96}H_{100}N_7O_{23}S$  [ $M+NH_4$ ] $^+$ : 1750.6586; found: 1750.6578.

**Methyl [2-azido-3,6-di-*O*-benzyl-2-deoxy- $\alpha$ -D-glucopyranosyl-(1 $\rightarrow$ 4)-(methyl 2-*O*-benzoyl-3-*O*-benzyl- $\alpha$ -L-idopyranosyl uronate)-(1 $\rightarrow$ 4)-2-azido-3,6-di-*O*-benzyl-2-deoxy- $\alpha$ -D-glucopyranosyl-(1 $\rightarrow$ 4)-(phenyl 2-*O*-benzoyl-3-*O*-benzyl-1-thio- $\beta$ -L-idopyranoside)] uronate ( $\beta$ -7)**

To  $\beta$ -6 (952 mg, 0.55 mmol) was added  $CH_3CN$  (33 mL) and water (3 mL) followed by ammonium cerium(IV) nitrate (99.99+%, 751 mg, 1.37 mmol). The orange solution was stirred for 90 min and was then extracted with DCM (200 mL, 50 mL) and water (200 mL), dried ( $MgSO_4$ ), filtered and evaporated. The crude product was purified using flash column chromatography (EtOAc/hexane 1:3) yielding  $\beta$ -7 (596 mg, 67%) as a white foam and recovered starting material (259 mg, 27%).  $R_f$  0.20 (EtOAc/Hexane 1:2).  $[\alpha]_D^{20} = +10.4$  ( $c = 0.12$ ,  $CH_2Cl_2$ ).  $^1H$  NMR (400 MHz;  $CDCl_3$ )  $\delta$  8.21-8.18 (m, 2H, Bz), 7.97-7.94 (m, 2H, Bz), 7.53-7.50 (m, 2H, Bz), 7.42-7.05 (m, 35H, Ph), 5.55 (d,  $J = 4.8$  Hz, 1H,  $H''-1$ ), 5.23 (d,  $J = 1.6$  Hz, 1H, H-1), 5.21-5.18 (m, 2H, H-2,  $H''-2$ ), 4.95 (d, 1H,  $J = 3.6$  Hz,  $H'-1$ ), 4.86-4.72 (m, 4H,  $2 \times CH_2Ph$ ), 4.59-4.46 (m, 9H,  $H'''-1$ ,  $H'''-5$ , H-5,  $3 \times CH_2Ph$ ), 4.26-4.20 (m, 2H, H-3,  $H''-3$ ), 4.26-3.34 (m, 13H, H-4,  $H''-4$ ,  $H'-3$ ,  $H'-4$ ,  $H'-5$ ,  $H'-6$ ,  $H'''-3$ ,  $H'''-5$ ,  $H'''-6$ ,  $CH_2Ph$ ), 3.43 (s, 3H,  $COOCH_3$ ), 3.41 (s, 3H,  $COOCH_3$ ), 3.23-3.17 (m, 3H,  $H'-2$ ,  $H'''-2$ ,  $H'''-4$ ).  $^{13}C$  NMR (100 MHz;  $CDCl_3$ )  $\delta$  169.3, 168.6, 166.4, 165.2, 138.0, 138.0, 137.9, 137.6, 137.4, 136.9, 134.7, 133.4, 133.3, 131.4, 131.1, 130.1, 130.0, 129.9, 129.9, 129.6, 129.4, 129.0, 128.9, 128.8, 128.6, 128.6, 128.6, 128.6, 128.5, 128.5, 128.4, 128.3, 128.3, 128.3, 128.1, 128.0, 128.0, 127.9, 127.8, 127.8, 127.7, 127.7, 127.6, 127.2, 99.3, 99.0, 98.1, 85.9, 79.2, 78.5, 77.4, 77.1, 77.1, 76.8, 75.8, 75.7, 75.6, 75.0, 75.0, 74.8, 74.5, 74.1, 73.8, 73.6, 72.8, 72.5, 72.3, 71.3, 70.8, 70.5, 70.2, 70.0, 69.4, 67.4, 63.6, 62.7, 52.1, 51.9. HRMS (FT MS):  $m/z$ : calcd for  $C_{88}H_{92}N_7O_{22}S$  [ $M+NH_4$ ] $^+$ : 1630.6011; found: 1630.6009.

**Methyl [2-azido-3,6-di-*O*-benzyl-2-deoxy-4-*O*-trichloroacetyl- $\alpha$ -D-glucopyranosyl-(1 $\rightarrow$ 4)-(methyl 2-*O*-benzoyl-3-*O*-benzyl- $\alpha$ -L-idopyranosyl uronate)-(1 $\rightarrow$ 4)-2-azido-3,6-di-*O*-benzyl-2-deoxy- $\alpha$ -D-glucopyranosyl-(1 $\rightarrow$ 4)-(phenyl 2-*O*-benzoyl-3-*O*-benzyl-1-thio-L-idopyranoside)] uronate ( $\alpha$ -8 and  $\beta$ -8)**

The tetrasaccharide  $\alpha$ -7 (596 mg, 0.37 mmol) was dissolved in dry DCM (5 mL), cooled to 0 °C in an icebath, then dry pyridine (0.15 mL, 1.85 mmol) and trichloroacetyl chloride (0.10 mL, 0.93 mmol) was added. The solution was stirred for 1 h. The solution was extracted with DCM (50 mL) and water (50 mL), dried ( $MgSO_4$ ), filtered and evaporated. The crude product was purified using flash column chromatography (EtOAc/hexane 1:3). This yielded  $\alpha$ -8 (610 mg, 94%) as a white foam. The same procedure was used for converting  $\beta$ -7 into  $\beta$ -8.

$\alpha$ -8:  $R_f$  0.23 (EtOAc/Hexane 1:3).  $[\alpha]_D^{20} = -18.3$  ( $c = 0.84$ ,  $CH_2Cl_2$ ).  $^1H$  NMR (500 MHz;  $CDCl_3$ )  $\delta$  8.13-8.11 (m, 2H, Bz), 8.02-8.00 (m, 2H, Bz), 7.53-7.12 (m, 35H, Ph), 5.78-5.77 (m, 1H, H-1), 5.55 (d,  $J = 3.8$  Hz, 1H,  $H''-1$ ), 5.37-5.38 (m, 1H, H-2), 5.31-5.27 (m, 2H,  $H'''-4$ , H-5), 5.17 (t, 1H,  $J = 4.4$  Hz,  $H''-2$ ), 4.97-4.75 (m, 4H,  $2 \times CH_2Ph$ ), 4.90 (d,  $J = 3.6$  Hz, 1H,  $H'-1$  or  $H'''-1$ ), 4.69 (d,  $J = 3.6$  Hz, 1H,  $H'-1$  or  $H'''-1$ ), 4.64 (d,  $J = 4.1$  Hz, 1H,  $H''-5$ ), 4.53-4.25 (m, 6H,  $3 \times CH_2Ph$ ), 4.21 (t,  $J = 5.2$  Hz, 1H,  $H''-3$ ), 4.19-4.18 (m, 1H, H-3), 4.02-4.01 (m, 1H, H-4), 3.99-3.41 (m, 13H,  $H''-4$ ,  $H'-3$ ,  $H'-4$ ,  $H'-5$ ,  $H'-6$ ,  $H'''-3$ ,  $H'''-4$ ,  $H'''-5$ ,  $H'''-6$ ,  $CH_2Ph$ ), 3.55 (s, 3H,  $COOCH_3$ ), 3.45 (s, 3H,  $COOCH_3$ ), 3.37 (dd, 1H,  $J = 10.1$  Hz, 3.4 Hz  $H'-2$  or  $H'''-2$ ), 3.27 (dd, 1H,  $J = 10.3$  Hz, 3.6 Hz  $H'-2$  or  $H'''-2$ ).  $^{13}C$  NMR (100 MHz;  $CDCl_3$ )  $\delta$  169.3, 169.2, 165.6, 165.3, 160.2, 138.0, 137.8, 137.3, 137.1, 136.8, 135.4, 133.6, 133.5, 131.3, 130.0, 129.9, 129.6, 129.5, 129.1, 128.8, 128.6,

128.6, 128.5, 128.5, 128.4, 128.3, 128.2, 128.2, 128.1, 128.0, 128.0, 127.9, 127.7, 127.6, 127.4, 127.2, 99.8, 99.2, 98.5, 89.7, 86.8, 78.6, 77.6, 77.5, 77.2, 76.8, 76.5, 76.0, 75.9, 74.9, 74.8, 74.8, 74.1, 73.9, 73.8, 73.6, 72.8, 71.9, 71.4, 70.5, 69.6, 69.3, 69.2, 68.5, 67.7, 67.2, 63.8, 63.1, 60.5, 52.1, 51.9. ES MS: m/z: calcd for C<sub>90</sub>H<sub>87</sub>Cl<sub>3</sub>N<sub>6</sub>O<sub>23</sub>SNa [M+Na]<sup>+</sup>: 1779.5; found: 1779.5. Elemental analysis calcd (%) for C<sub>90</sub>H<sub>87</sub>Cl<sub>3</sub>N<sub>6</sub>O<sub>23</sub>S: C 61.45, H 4.98, N 4.78; found C 61.71, H 5.05, N 4.69. **β-8**: *R<sub>f</sub>* 0.18 (EtOAc/Hexane 1:3). [α]<sub>D</sub><sup>20</sup> = +32.9 (*c* = 0.61, CH<sub>2</sub>Cl<sub>2</sub>). <sup>1</sup>H NMR (400 MHz; CDCl<sub>3</sub>) δ 8.24-8.21 (m, 2H, Bz), 8.03-8.00 (m, 2H, Bz), 7.57-7.54 (m, 2H, Bz), 7.45-7.07 (m, 35H, Ph), 5.56 (d, *J* = 3.8 Hz, 1H, H<sup>''-1</sup>), 5.32 (t, *J* = 9.4 Hz, 1H, H<sup>'''-4</sup>), 5.27 (d, *J* = 1.9 Hz, 1H, H-1), 5.24-5.23 (m, 1H, H-2), 5.18 (t, *J* = 4.4 Hz, H<sup>''-2</sup>), 4.90-4.75 (m, 5H, H<sup>'-1</sup>, 2xCH<sub>2</sub>Ph), 4.64 (d, *J* = 4.4 Hz, H-5 or H-5<sup>''</sup>), 4.55-4.45 (m, 6H, H<sup>'''-1</sup>, H<sup>''-5</sup> or H-5, 2xCH<sub>2</sub>Ph), 4.33-4.18 (m, 4H, H-3, H<sup>''-3</sup>, CH<sub>2</sub>Ph), 4.01-3.90 (m, 4H, H-4, H<sup>''-4</sup>, CH<sub>2</sub>Ph), 3.74-3.37 (m, 10H, H<sup>'-2</sup>, H<sup>'-3</sup>, H<sup>'-4</sup>, H<sup>'-5</sup>, H<sup>'-6</sup>, H<sup>'''-3</sup>, H<sup>'''-5</sup>, H<sup>'''-6</sup>), 3.50 (s, 3H, COOCH<sub>3</sub>), 3.39 (s, 3H, COOCH<sub>3</sub>), 3.25 (dd, *J* = 10.3 Hz, *J* = 3.6 Hz, 1H, H<sup>'''-2</sup>). <sup>13</sup>C NMR (100 MHz; CDCl<sub>3</sub>) δ 169.2, 168.6, 166.4, 165.3, 160.2, 138.0, 137.8, 137.3, 137.3, 137.0, 136.8, 134.7, 133.4, 133.4, 131.5, 130.1, 129.9, 129.7, 129.5, 129.0, 128.8, 128.7, 128.7, 128.7, 128.6, 128.6, 128.5, 128.5, 128.4, 128.3, 128.3, 128.2, 128.1, 128.0, 128.0, 127.9, 127.9, 127.7, 127.7, 127.6, 127.5, 127.4, 127.1, 99.3, 99.2, 98.3, 89.7, 85.9, 78.5, 77.5, 77.4, 76.1, 75.7, 75.3, 74.9, 74.8, 74.6, 74.2, 73.8, 73.8, 73.6, 72.9, 72.5, 71.3, 70.2, 70.0, 69.4, 69.1, 67.8, 67.2, 63.9, 63.1, 52.1, 51.9.

**Methyl [2-azido-3,6-di-*O*-benzyl-2-deoxy- $\alpha$ -D-glucopyranosyl-(1 $\rightarrow$ 4)-(methyl 2-*O*-benzoyl-3-*O*-benzyl- $\alpha$ -L-idopyranosyl uronate)-(1 $\rightarrow$ 4)- 2-azido-3,6-di-*O*-benzyl-2-deoxy- $\alpha$ -D-glucopyranosyl-(1 $\rightarrow$ 4)-((*S*)-2,3-bis(benzyloxy)propyl 2-*O*-benzoyl-3-*O*-benzyl- $\alpha$ -L-idopyranoside)] uronate (**9**)**

Tetrasaccharide **α-7** (145 mg, 0.082 mmol) was dissolved in dry DCM (2 mL) under N<sub>2</sub>. (*S*)-2,3-Bis(benzyloxy)propanol (44 mg, 0.163 mmol) was added and the clear solution cooled to 0 °C. Freshly activated 4Å powdered molecular sieves (137 mg) were added, after 10 min. NIS (50 mg, 2.22 mmol) and after another 10 min. AgOTf (catalytic amount). The suspension changed colour from pale yellow to deep red and was stirred for a further 20 min. The reaction was quenched into NaHCO<sub>3</sub> (250 mg) and Na<sub>2</sub>S<sub>2</sub>O<sub>3</sub> (250 mg) in water (5 mL). After stirring for 10 mins and the reaction colour changing to pale yellow the suspension was filtered through a short pad of Celite® washing with water and DCM. The layers were separated and the aqueous extracted with DCM (10 mL). The organics were combined, dried (MgSO<sub>4</sub>) and solvent removed *in vacuo* to reveal the crude product as a pale yellow oil. This was purified by flash column chromatography (EtOAc/Hexane 3:5) to give **9** (130 mg, 82%) as a white foam. *R<sub>f</sub>* 0.22 (EtOAc/Hexane 1:2). [α]<sub>D</sub><sup>20</sup> = +0.7 (*c* = 0.37, CH<sub>2</sub>Cl<sub>2</sub>). <sup>1</sup>H NMR (500 MHz; CDCl<sub>3</sub>) δ 8.11-8.09 (m, 2H, Bz), 8.00-7.98 (m, 2H, Bz), 7.54-7.14 (m, 40H, Ph), 5.55 (d, *J* = 4.7 Hz, H<sup>''-1</sup>), 5.21 (t, 1H, *J* = 5.4 Hz, H<sup>''-2</sup>), 5.14-5.13 (m, 1H, H-1), 5.12-5.11 (m, H-2), 4.94 (d, *J* = 3.6 Hz, 1H, H<sup>'-1</sup>), 4.87-4.41 (m, 19H, H<sup>'''-1</sup>, H-5, H<sup>''-5</sup>, 8xCH<sub>2</sub>Ph), 4.21 (t, *J* = 6.0 Hz, 1H, H<sup>''-3</sup>), 4.10-4.09 (m, 1H, H-3), 4.04-4.01 (m, 1H, H<sup>''-4</sup>), 3.99-3.98 (m, 1H, H-4), 3.96-3.42 (m, 15H, H<sup>'-3</sup>, H<sup>'-4</sup>, H<sup>'-5</sup>, H<sup>'-6</sup>, H<sup>'''-3</sup>, H<sup>'''-4</sup>, H<sup>'''-5</sup>, H<sup>'''-6</sup>, CH<sub>2</sub>CHOBNCH<sub>2</sub>OBN), 3.46 (s, 3H, COOCH<sub>3</sub>), 3.44 (s, 3H, COOCH<sub>3</sub>), 3.23 (dd, 1H, *J* = 10.2 Hz, 3.6 Hz H<sup>'-2</sup> or H<sup>'''-2</sup>), 3.19 (dd, 1H, *J* = 10.3 Hz, 3.6 Hz H<sup>'-2</sup> or H<sup>'''-2</sup>). <sup>13</sup>C NMR (100 MHz; CDCl<sub>3</sub>) δ 169.6, 169.5, 169.4, 165.8, 165.4, 138.6, 138.3, 138.2, 138.1, 138.0, 137.7, 137.7, 137.5, 133.6, 130.1, 129.8, 129.6, 128.9, 128.7, 128.7, 128.6, 128.6, 128.5, 128.5, 128.4, 128.4, 128.3, 128.2, 128.1, 128.1, 128.0, 127.9, 127.8, 127.8, 127.7, 127.4, 99.4, 99.3, 98.4, 79.4, 78.6, 77.5, 76.8, 76.0, 75.9, 75.8, 75.1, 74.9, 74.5, 74.2, 73.9, 73.8, 73.5, 72.8, 72.5, 71.5, 71.2, 70.7, 70.5, 69.8, 69.6, 68.6, 67.8, 67.6, 67.5, 63.7, 62.9, 60.6, 52.1, 52.0. HRMS (FT MS): m/z: calcd for



C<sub>99</sub>H<sub>106</sub>N<sub>7</sub>O<sub>25</sub> [*M*+NH<sub>4</sub><sup>+</sup>]: 1792.7233; found: 1792.7212. Elemental analysis calcd (%) for C<sub>99</sub>H<sub>102</sub>N<sub>6</sub>O<sub>25</sub>: C 66.96, H 5.79, N 4.73; found C 66.71, H 5.69, N 4.68.

**Methyl [2-azido-3,6-di-*O*-benzyl-2-deoxy-4-*O*-*p*-methoxybenzyl- $\alpha$ -D-glucopyranosyl-(1 $\rightarrow$ 4)-(methyl 2-*O*-benzoyl-3-*O*-benzyl- $\alpha$ -L-idopyranosyl uronate)-(1 $\rightarrow$ 4)-2-azido-3,6-di-*O*-benzyl-2-deoxy- $\alpha$ -D-glucopyranosyl-(1 $\rightarrow$ 4)-(methyl 2-*O*-benzoyl-3-*O*-benzyl- $\alpha$ -L-idopyranosyl uronate)-(1 $\rightarrow$ 4)-2-azido-3,6-di-*O*-benzyl-2-deoxy- $\alpha$ -D-glucopyranosyl-(1 $\rightarrow$ 4)-(methyl 2-*O*-benzoyl-3-*O*-benzyl- $\alpha$ -L-idopyranosyl uronate)-(1 $\rightarrow$ 4)-2-azido-3,6-di-*O*-benzyl-2-deoxy- $\alpha$ -D-glucopyranosyl-(1 $\rightarrow$ 4)-((*S*)-2,3-bis(benzyloxy)propyl 2-*O*-benzoyl-3-*O*-benzyl- $\alpha$ -L-idopyranoside)] uronate (10)**

Tetrasaccharide **9** (55 mg, 0.031 mmol) and donor  $\beta$ -**6** (65 mg, 0.037 mmol) was dissolved in dry DCM (1 mL) under N<sub>2</sub>. Freshly activated 4Å powdered molecular sieves (100 mg) were added and the solution cooled to 0 °C in an ice-bath. After 10 min. NIS (13 mg, 0.046 mmol) was added, and after another 10 min. AgOTf (catalytic amount) was added. The suspension changed colour from pale yellow to deep red and was stirred for a further 35 min. The reaction was quenched by pouring into a separating funnel containing a mixture of DCM (20 mL), saturated aqueous NaHCO<sub>3</sub> (20 mL) and Na<sub>2</sub>S<sub>2</sub>O<sub>3</sub> (2 mL, 10% aqueous). After shaking until the iodine colour was removed the suspension was filtered through a short pad of Celite® washing with water and DCM. The layers were separated and the aqueous extracted with DCM (10 mL). The organic layers were combined, dried (MgSO<sub>4</sub>) and solvent removed *in vacuo*. The crude product was purified by silica gel flash column chromatography (EtOAc/hexane 3:7) to give **10** (85 mg, 81%) as a white foam. *R*<sub>f</sub> 0.24 (EtOAc/Hexane 1:2). [ $\alpha$ ]<sub>D</sub><sup>20</sup> = +9.1 (*c* = 0.78, CH<sub>2</sub>Cl<sub>2</sub>). <sup>1</sup>H NMR (400 MHz; CDCl<sub>3</sub>)  $\delta$  8.10-8.08 (m, 2H, Bz), 7.95-7.91 (m, 6H, Bz), 7.55-7.00 (m, 84H, Ph, PMB), 6.83 (d, 1H, *J* = 8.8 Hz, PMB), 5.55-5.51 (m, 3H, H<sup>''-1</sup>, H<sup>'''-1</sup>, H<sup>''''-1</sup>), 5.19-5.15 (m, 3H, H<sup>''-2</sup>, H<sup>'''-2</sup>, H<sup>''''-2</sup>), 5.11-5.10 (m, 2H, H-1, H-2), 4.97 (d, 1H, *J* = 3.5 Hz, H<sup>''-1</sup> or H<sup>'''-1</sup> or H<sup>''''-1</sup>), 4.93 (d, 1H, *J* = 3.5 Hz, H<sup>''-1</sup> or H<sup>'''-1</sup> or H<sup>''''-1</sup>), 4.89 (d, 1H, *J* = 3.8 Hz, H<sup>''-1</sup> or H<sup>'''-1</sup> or H<sup>''''-1</sup>), 4.88-4.29 (m, 33H, H<sup>''''''-1</sup>, H-5, H<sup>''-5</sup>, H<sup>'''-5</sup>, H<sup>''''-5</sup>, 14xCH<sub>2</sub>Ph), 4.23-4.07 (m, 4H, H-3, H<sup>''-3</sup>, H<sup>'''-3</sup>, H<sup>''''-3</sup>), 4.05-3.19 (m, 32H, H<sup>''-2</sup>, H<sup>'''-2</sup>, H<sup>''''-2</sup>, H<sup>''''''-2</sup>, H<sup>''-3</sup>, H<sup>'''-3</sup>, H<sup>''''-3</sup>, H<sup>''''''-3</sup>, H-4, H<sup>''-4</sup>, H<sup>'''-4</sup>, H<sup>''''-4</sup>, H<sup>''''''-4</sup>, H<sup>''-4</sup>, H<sup>'''-4</sup>, H<sup>''''-4</sup>, H<sup>''''''-4</sup>, H<sup>''-5</sup>, H<sup>'''-5</sup>, H<sup>''''-5</sup>, H<sup>''''''-5</sup>, H<sup>''-6</sup>, H<sup>'''-6</sup>, H<sup>''''-6</sup>, H<sup>''''''-6</sup>, CH<sub>2</sub>CHOBnCH<sub>2</sub>OBN), 3.81 (s, 3H, PhOCH<sub>3</sub>), 3.46 (s, 3H, COOCH<sub>3</sub>), 3.41 (s, 3H, COOCH<sub>3</sub>), 3.30 (s, 3H, COOCH<sub>3</sub>), 3.23 (s, 3H, COOCH<sub>3</sub>). HRMS (FTMS) : *m/z*: calcd for C<sub>189</sub>H<sub>200</sub>N<sub>14</sub>O<sub>48</sub> [*M*+2NH<sub>4</sub>]<sup>2+</sup>: 1717.6848; found: 1717.6827.

**Methyl [2-azido-3,6-di-*O*-benzyl-2-deoxy-4-*O*-trichloroacetyl- $\alpha$ -D-glucopyranosyl-(1 $\rightarrow$ 4)-(methyl 2-*O*-benzoyl-3-*O*-benzyl- $\alpha$ -L-idopyranosyl uronate)-(1 $\rightarrow$ 4)-2-azido-3,6-di-*O*-benzyl-2-deoxy- $\alpha$ -D-glucopyranosyl-(1 $\rightarrow$ 4)-(methyl 2-*O*-benzoyl-3-*O*-benzyl- $\alpha$ -L-idopyranosyl uronate)-(1 $\rightarrow$ 4)-2-azido-3,6-di-*O*-benzyl-2-deoxy- $\alpha$ -D-glucopyranosyl-(1 $\rightarrow$ 4)-(methyl 2-*O*-benzoyl-3-*O*-benzyl- $\alpha$ -L-idopyranosyl uronate)-(1 $\rightarrow$ 4)-2-azido-3,6-di-*O*-benzyl-2-deoxy- $\alpha$ -D-glucopyranosyl-(1 $\rightarrow$ 4)-((*S*)-2,3-bis(benzyloxy)propyl 2-*O*-benzoyl-3-*O*-benzyl- $\alpha$ -L-idopyranoside)] uronate (11)**

Tetrasaccharide **9** (68 mg, 0.038 mmol) and donor  $\alpha$ -**8** (81 mg, 0.046 mmol) was dissolved in dry DCM (1.5 mL) under N<sub>2</sub>. Freshly activated 4Å powdered molecular sieves (111 mg) were added and the solution cooled to 0 °C in an icebath. After 10 min. NIS (17 mg, 0.076 mmol) was added, and after another 10 min. AgOTf (catalytic amount) was added. The suspension changed colour from pale yellow to deep red and was stirred for a further 45 min. The reaction was quenched into a

separating funnel containing a mixture of DCM (30 mL), saturated aqueous NaHCO<sub>3</sub> (25 mL) and Na<sub>2</sub>S<sub>2</sub>O<sub>3</sub> (2 mL, 10% aqueous). After shaking until the iodine colour was removed the suspension was filtered through a short pad of Celite® washing with water and DCM. The layers were separated and the aqueous extracted with DCM (10 mL). The organic layers were combined, dried (MgSO<sub>4</sub>) and solvent removed *in vacuo*. The crude was purified by silica gel flash column chromatography (toluene/acetone 20:1) to give **11** (120 mg, 92%) of as a white foam. *R<sub>f</sub>* 0.23 (EtOAc/Hexane 1:2). [α]<sub>D</sub><sup>20</sup> = +12.9 (*c* = 0.35, CH<sub>2</sub>Cl<sub>2</sub>). <sup>1</sup>H NMR (500 MHz; CDCl<sub>3</sub>) δ 8.10-8.08 (m, 2H, Bz), 8.02-8.00 (m, 2H, Bz), 7.96-7.93 (m, 4H, Bz), 7.53-7.03 (m, 82H, Ph), 5.57-5.52 (m, 3H, H<sup>''</sup>-1, H<sup>''''</sup>-1, H<sup>''''''</sup>-1), 5.30 (t, 1H, *J* = 9.8 Hz, H<sup>''''''''</sup>-4), 5.19-5.16 (m, 3H, H<sup>''</sup>-2, H<sup>''''</sup>-2, H<sup>''''''</sup>-2), 5.12-5.11 (m, 2H, H-1, H-2), 4.94-4.90 (m, 3H, H<sup>'</sup>-1, H<sup>''</sup>-1, H<sup>''''</sup>-1), 4.87-4.24 (m, 33H, H<sup>''''''''</sup>-1, H-5, H<sup>''</sup>-5, H<sup>''''</sup>-5, H<sup>''''''</sup>-5, 14xCH<sub>2</sub>Ph), 4.24-4.09 (m, 4H, H-3, H<sup>''</sup>-3, H<sup>''''</sup>-3, H<sup>''''''</sup>-3), 4.04-3.20 (m, 32H, H<sup>'</sup>-2, H<sup>''</sup>-2, H<sup>''''</sup>-2, H<sup>''''''</sup>-2, H<sup>''''''''</sup>-2, H<sup>'</sup>-3, H<sup>''</sup>-3, H-3<sup>''''</sup>, H<sup>''''''</sup>-3, H-4, H<sup>''</sup>-4, H<sup>''''</sup>-4, H<sup>''''''</sup>-4, H<sup>'</sup>-4, H<sup>''</sup>-4, H<sup>''''</sup>-4, H<sup>''''''</sup>-4, H<sup>'</sup>-5, H<sup>''</sup>-5, H<sup>''''</sup>-5, H<sup>''''''</sup>-5, H<sup>'</sup>-6, H<sup>''</sup>-6, H<sup>''''</sup>-6, H<sup>''''''</sup>-6, CH<sub>2</sub>CHOBnCH<sub>2</sub>OBn), 3.47 (s, 3H, COOCH<sub>3</sub>), 3.44 (s, 3H, COOCH<sub>3</sub>), 3.33 (s, 3H, COOCH<sub>3</sub>), 3.27 (s, 3H, COOCH<sub>3</sub>). <sup>13</sup>C NMR (100 MHz; CDCl<sub>3</sub>) δ 169.4, 169.3, 169.2, 165.6, 165.2, 165.1, 160.2, 138.5, 138.1, 138.0, 137.9, 137.8, 137.7, 137.7, 137.5, 137.4, 137.4, 137.2, 137.2, 136.7, 133.6, 133.5, 129.9, 129.9, 129.8, 129.8, 129.6, 129.4, 129.3, 129.2, 128.8, 128.7, 128.7, 128.5, 128.4, 128.4, 128.4, 128.3, 128.3, 128.2, 128.1, 128.1, 128.0, 128.0, 127.9, 127.9, 127.8, 127.7, 127.7, 127.6, 127.5, 127.3, 127.3, 127.1, 99.3, 99.3, 99.2, 99.1, 99.1, 98.3, 98.0, 98.0, 89.7, 78.3, 78.2, 78.1, 77.5, 77.4, 77.2, 77.0, 77.0, 76.8, 76.7, 76.7, 76.7, 76.6, 76.6, 76.5, 76.5, 75.9, 75.8, 75.7, 75.7, 75.6, 75.4, 75.4, 75.3, 74.9, 74.8, 74.8, 74.6, 74.4, 74.2, 74.1, 74.1, 73.8, 73.7, 73.6, 73.6, 73.5, 73.3, 73.2, 72.6, 72.4, 71.3, 71.2, 71.1, 70.5, 70.5, 70.4, 69.6, 69.2, 68.4, 68.3, 67.5, 67.3, 67.2, 67.2, 63.4, 63.4, 63.2, 63.2, 63.1, 60.4, 53.5, 51.9, 51.7, 51.6. MS (MALDI-TOF): *m/z*: calcd for C<sub>183</sub>H<sub>183</sub>Cl<sub>3</sub>N<sub>12</sub>NaO<sub>48</sub> [M+Na]<sup>+</sup>: 3444.1; found: 3444.1. Elemental analysis calcd (%) for C<sub>183</sub>H<sub>183</sub>Cl<sub>3</sub>N<sub>12</sub>O<sub>48</sub>: C 64.18, H 5.39, N 4.91; found C 64.10, H 5.32, N 4.89.

**Methyl [2-azido-3,6-di-*O*-benzyl-2-deoxy-α-D-glucopyranosyl-(1→4)-(methyl 2-*O*-benzoyl-3-*O*-benzyl-α-L-idopyranosyl uronate )-(1→4)-2-azido-3,6-di-*O*-benzyl-2-deoxy-α-D-glucopyranosyl-(1→4)-(methyl 2-*O*-benzoyl-3-*O*-benzyl-α-L-idopyranosyl uronate)-(1→4)-2-azido-3,6-di-*O*-benzyl-2-deoxy-α-D-glucopyranosyl-(1→4)-(methyl 2-*O*-benzoyl-3-*O*-benzyl-α-L-idopyranosyl uronate)-(1→4)-2-azido-3,6-di-*O*-benzyl-2-deoxy-α-D-glucopyranosyl-(1→4)-((*S*)-2,3-bis(benzyloxy)propyl 2-*O*-benzoyl-3-*O*-benzyl-α-L-idopyranoside)] uronate (**12**)**

The octasaccharide **11** (346 mg, 0.10 mmol) was dissolved in a mixture of MeOH/pyridine (5 mL/2 mL) and heated to 50 °C for 4 h. The solvents were evaporated and co-evaporated with toluene (2x20 mL). The crude product was purified using flash column chromatography (EtOAc/hexane 1:2 and 3:5). This yielded **12** (300 mg, 91%) as a white foam, along with recovered starting material (20 mg, 5%). *R<sub>f</sub>* 0.10 (EtOAc/Hexane 1:2). [α]<sub>D</sub><sup>20</sup> = +9.8 (*c* = 0.32, CH<sub>2</sub>Cl<sub>2</sub>). <sup>1</sup>H NMR (500 MHz; CDCl<sub>3</sub>) δ 8.10-8.08 (m, 2H, Bz), 8.00-7.93 (m, 6H, Bz), 7.54-7.03 (m, 82H, Ph), 5.57-5.52 (m, 3H, H<sup>''</sup>-1, H<sup>''''</sup>-1, H<sup>''''''</sup>-1), 5.22-5.15 (m, 3H, H<sup>''</sup>-2, H<sup>''''</sup>-2, H<sup>''''''</sup>-2), 5.12-5.11 (m, 2H, H-1, H-2), 4.97 (d, 1H, *J* = 3.5 Hz, H<sup>'</sup>-1 or H<sup>''</sup>-1 or H<sup>''''</sup>-1), 4.93 (d, 1H, *J* = 3.6 Hz, H<sup>'</sup>-1 or H<sup>''</sup>-1 or H<sup>''''</sup>-1), 4.90 (d, 1H, *J* = 3.6 Hz, H<sup>'</sup>-1 or H<sup>''</sup>-1 or H<sup>''''</sup>-1), 4.86-4.34 (m, 33H, H<sup>''''''''</sup>-1, H-5, H<sup>''</sup>-5, H<sup>''''</sup>-5, H<sup>''''''</sup>-5, 14xCH<sub>2</sub>Ph), 4.24-4.08 (m, 4H, H-3, H<sup>''</sup>-3, H<sup>''''</sup>-3, H<sup>''''''</sup>-3), 4.05-3.20 (m, 32H, H<sup>'</sup>-2, H<sup>''</sup>-2, H<sup>''''</sup>-2, H<sup>''''''</sup>-2, H<sup>'</sup>-3, H<sup>''</sup>-3, H-3<sup>''''</sup>, H<sup>''''''</sup>-3, H-4, H<sup>''</sup>-4, H<sup>''''</sup>-4, H<sup>''''''</sup>-4, H<sup>'</sup>-4, H<sup>''</sup>-4, H<sup>''''</sup>-4, H<sup>''''''</sup>-4, H<sup>'</sup>-5, H<sup>''</sup>-5, H<sup>''''</sup>-5, H<sup>''''''</sup>-5, H<sup>'</sup>-6, H<sup>''</sup>-6, H<sup>''''</sup>-6, H<sup>''''''</sup>-6, CH<sub>2</sub>CHOBnCH<sub>2</sub>OBn), 3.48 (s, 3H, COOCH<sub>3</sub>), 3.44 (s, 3H, COOCH<sub>3</sub>), 3.32 (s, 3H, COOCH<sub>3</sub>), 3.27
